# Supplementary material for: Life history and ancestry of the late Upper Palaeolithic infant from Grotta delle Mura, Italy
Source: Springer Nature journal article supplement (doi:10.1038/s41467-024-51150-x), 2024-09-20
Supplement: MOESM3 [file 41467_2024_51150_MOESM3_ESM.pdf]

## Description of Additional Supplementary Files

“Life history and ancestry of the Late Upper Palaeolithic infant from Grotta delle Mura, Italy”

### Supplementary Data

- Supplementary Data 1. Samples and results for AMS radiocarbon dating.
- Supplementary Data 2. Parameters of crown growth and development for buccal and lingual aspects of the ULdi1 and of the URM1 paracone of Le Mura 1, and comparison with histology-derived parameters reported in the literature. DSR (daily secretion rate), EER (enamel extension rate), Ci (crown initiation), Crc (crown completion), CFT (crown formation time), U (upper), L(left), R(right). † From average timing in literature (AlQahtani et al., 2010; Hillson, 1996; Antoine, 2001; Reid et al., 1998). \* Crown at ~ Cr 1/2 (Moorrees, 1963) as it was still in formation at the moment of death. Values from the literature denote reported averages, while values enclosed in brackets signify the range of extreme values.
- Supplementary Data 3. Descriptive statistics of elemental analyses along the buccal LA tracks. Source Data can be found in Supplementary Data 4.
- Supplementary Data 4. Elemental content along the LA-ICPMS tracks following the buccal EDJ of the ULdi1 and URM1 (BDL = Below Detection Limit).
- Supplementary Data 5. Isotopic signal along the LA-MC-ICPMS tracks on the ULdi1 and URM1.
- Supplementary Data 6. Mapping statistics on the hg19 human reference genome.
- Supplementary Data 7. Contamination estimation on nuclear genome.
- Supplementary Data 8. Biological sex identification results.
- Supplementary Data 9. Y chromosome variants identified using Yleaf v2.0 software.
- Supplementary Data 10. Individuals used in the MDS analysis.
- Supplementary Data 11. Outgroup f3-statistics in the form f3(Le Mura 1, X; Mbuti.SDG).
- Supplementary Data 12. Individuals used in the PCA analysis.
- Supplementary Data 13. f4-statistics in the form f4(Le Mura 1, Group3; X, Mbuti).
- Supplementary Data 14. f4-statistics analysis in the form f4(Group2, Group3; Le Mura 1, Mbuti.SDG).
- Supplementary Data 15. qpAdm performed using f-statistics.
- Supplementary Data 16. qpWave performed using f-statistics.
- Supplementary Data 17. qpGraph.
- Supplementary Data 18. PMR analysis results.
- Supplementary Data 19. hapROH summary.
- Supplementary Data 20. f4 statistics in the form f4(Pop1, Pop2; El Mirón/GoyetQ2, Mbuti).

- Supplementary Data 21.  $f_4$ -statistics in the form  $f_4(\text{Le Mura 1, X; Gravettian-related individuals, Mbuti})$ .
- Supplementary Data 22. Neanderthal admixture analysis results.
- Supplementary Data 23. HIrisPlex-S results.
- Supplementary Data 24. Functional and phenotypically interesting SNPs.
- Supplementary Data 25. Bioinformatic analysis results for mitochondrial genome reconstruction
- Supplementary Data 26. Pre-Neolithic mitogenomes used in phylogenetic analysis for the Maximum Parsimony tree.
- Supplementary Data 27. Modern and ancient mitogenomes used for BEAST analysis.
- Supplementary Data 28. Divergence time for U2'3'4'7'8'9 lineages estimated by the Bayesian analysis.
