# Supplementary material for: Life history and ancestry of the late Upper Palaeolithic infant from Grotta delle Mura, Italy
Source: Springer Nature journal article supplement (doi:10.1038/s41467-024-51150-x), 2024-09-20
Supplement: MOESM4 [file 41467_2024_51150_MOESM4_ESM.xlsx]

## Sheet: 1. AMS radiocarbon dating
Supplementary Data 1. Samples and results for AMS radiocarbon dating.
Treated with Talamo's method for very small ammount of samples (Fewlass et al., 2019)
MPI code	Submitter Code	Sample Weight (g)	collagen mass (mg)	%Coll	δ13 C	δ15 N	%C	%N	C:N	AMS Code	14C Age	C Age	R_Combine 14C Age ± 1s Err	Cal BP 68.3%	Cal BP 95.4%
R-EVA 3275	Mura 1	146.7	4	03:13:00	-19.1	15.4	40.8	15.0	3.2	MAMS-42397	14050	50	14005±36	17080-16980	17320-16910
R-EVA 3276	Mura 2	179.7	3.6	2	-18.9	15.1	30.5	11.7	3.0	MAMS-42398	13960	50

## Sheet: 2. Crown developmental paramet
Supplementary Data 2. Parameters of crown growth and development for buccal and lingual aspects of the ULdi1 and of the URM1 paracone of Le Mura 1, and comparison with histology-derived parameters reported in the literature.
DSR (daily secretion rate), EER (enamel extension rate), Ci (crown initiation), Crc (crown completion), CFT (crown formation time), U (upper), L (left), R(right).
† From average timing in literature (AlQahtani et al., 2010; Hillson, 1996; Antoine, 2001; Reid et al., 1998).
* Crown at ~ Cr 1/2 (Moorrees, 1963) as it was still in formation at the moment of death.
Values from the literature denote reported averages, while values enclosed in brackets signify the range of extreme values.
		Le Mura 1			Mahoney, 2012; 2015	Nava et al., 2017 (Velia)	Nava et al., 2017 (Ostuni)	Gustafson and Koch, 1974	Dean et al., 1993	Reid et al., 1998	Reid and Dean, 2006	Smith et al., 2010
		ULdi1		URM1	U di1	U di1	U di1	U M1	U M1	U M1	U M1	U M1
		Buccal	Lingual	Paracone	Buccal	Buccal	Buccal	Paracone	Paracone	Paracone	Paracone	Paracone
DSR (µmd-1)	Min	2.35	2.04	2.28	02:00:00	x	x	x	x	x	x	x
	Max	3.43	3.39	3.68	x	x	x	x	x	x	x	x
	Mean	2.86	2.74	3.11	03:51:00	x	x	x	x	x	x	x
	sd	0.24	0.23	0.26	x	x	x	x	x	x	x	x
	n	124	160	149	x	x	x	x	x	x	x	x
EER (µmd-1)	Min	10.95	6.89	3.20	14.16	12.3	NA	x	x	x	x	x
	Max	78.84	47.35	35.18	52.03	84.3	56.2	x	x	x	x	x
	Mean	22.31	23.76	7.13	x	x	x	x	x	x	x	06:23:00
Ci (weeks)		-30	-30	Birth†	-27 (-29 to -23)	-18 (-26 to -10)	x	Birth†	Birth†	Birth†	Birth†	Birth†
Crc (weeks)		12	12	70*	28	x	NA	162	126	133	150	140 (118 to 149)
CFT (weeks)		42	42	NA	55	x	NA	162	126	148 (136 to 165)	150	140 (118 to 149)

## Sheet: 3. Descriptive statistics
Supplementary Data 3. Descriptive statistics of elemental analyses along the buccal LA tracks. Source Data can be found in Supplementary Data 4.
		Mg					Al					Mn					Zn					Sr					Y					Ba					Ce					Pb					U
Tooth	LA track	Mean	SD	Min	Max	Median	Mean	SD	Min	Max	Median	Mean	SD	Min	Max	Median	Mean	SD	Min	Max	Median	Mean	SD	Min	Max	Median	Mean	SD	Min	Max	Median	Mean	SD	Min	Max	Median	Mean	SD	Min	Max	Median	Mean	SD	Min	Max	Median	Mean	SD	Min
ULdi1	EDJ1 - buccal	1846	158	1551	2309	1830	33.5	21.1	13.6	400.3	28.7	4.6	5.9	1.7	58.4	3.0	34.7	11.6	18.4	140.3	32.3	194.5	12.0	171.8	255.3	192.9	00:45:00	00:37:00	00:09:00	02:15:00	00:33:00	11.4	6.3	3.5	66.1	10.2	00:30:00	00:28:00	00:06:00	01:56:00	00:20:00	00:16:00	00:14:00	00:07:00	01:41:00	00:12:00	01:14:00	01:19:00	00:01:00
URM1	EDJ2 - buccal	2650	201	2198	4339	2619	50.6	6.5	40.0	149.5	50.5	10.6	65.0	2.9	1426.5	6.1	137.7	14.4	111.1	251.7	135.6	275.6	24.5	223.6	384.4	273.8	01:01:00	02:27:00	00:06:00	11:12:00	00:26:00	54.8	3.7	46.4	85.5	54.7	01:28:00	03:39:00	00:04:00	1 day, 0:01:00	00:19:00	02:38:00	02:25:00	01:14:00	1 day, 1:28:00	01:50:00	22:38:00	02:15:00	15:23:00
All data are reported as µg/g.
[truncated: 2 more columns]

## Sheet: 4.Elemental content
Supplementary Data 4. Elemental content along the LA-ICPMS tracks following the buccal EDJ of the ULdi1 and URM1 (BDL = Below Detection Limit)
Distance (µm)	Mg (µg/g)	Al (µg/g)	Mn (µg/g)	Zn (µg/g)	Sr (µg/g)	Y (µg/g)	Ba (µg/g)	Ce (µg/g)	Pb (µg/g)	U (µg/g)	Mg/Ca	Zn/Ca	Sr/Ca	Ba/Ca	Tooth	Laser track	Aspect	Days
00:00:00	95 days, 10:44:00	2 days, 6:46:00	04:43:00	1 day, 18:10:00	7 days, 11:23:00	BDL	08:31:00	BDL	BDL	BDL	01:02:00	00:11:00	00:48:00	00:21:00	ULdi1	EDJ1	buccal	-8 days, 5:52:00
08:06:00	96 days, 5:26:00	2 days, 8:06:00	04:35:00	1 day, 17:46:00	7 days, 12:49:00	BDL	08:22:00	BDL	BDL	00:01:00	01:02:00	00:11:00	00:49:00	00:22:00	ULdi1	EDJ1	buccal	-8 days, 5:55:00
15:33:00	90 days, 20:30:00	2 days, 8:13:00	03:05:00	1 day, 13:24:00	7 days, 19:25:00	BDL	10:27:00	BDL	BDL	00:07:00	00:59:00	00:10:00	00:50:00	00:27:00	ULdi1	EDJ1	buccal	-8 days, 5:58:00
23:00:00	91 days, 23:08:00	2 days, 12:00:00	04:38:00	1 day, 12:02:00	7 days, 12:24:00	BDL	09:20:00	BDL	BDL	00:29:00	01:00:00	00:10:00	00:49:00	00:25:00	ULdi1	EDJ1	buccal	-8 days, 6:00:00
1 day, 7:06:00	87 days, 12:25:00	2 days, 17:30:00	04:02:00	1 day, 13:16:00	7 days, 15:36:00	BDL	09:49:00	BDL	BDL	00:22:00	00:57:00	00:10:00	00:49:00	00:26:00	ULdi1	EDJ1	buccal	-8 days, 5:23:00
1 day, 14:33:00	87 days, 22:24:00	2 days, 13:04:00	04:19:00	1 day, 10:23:00	7 days, 13:04:00	00:10:00	09:03:00	BDL	00:12:00	00:08:00	00:57:00	00:09:00	00:49:00	00:23:00	ULdi1	EDJ1	buccal	-8 days, 5:26:00
1 day, 22:00:00	89 days, 5:51:00	2 days, 8:44:00	03:39:00	1 day, 12:00:00	7 days, 13:09:00	BDL	08:15:00	BDL	00:12:00	00:03:00	00:58:00	00:10:00	00:49:00	00:21:00	ULdi1	EDJ1	buccal	-8 days, 5:29:00
2 days, 6:07:00	89 days, 22:33:00	2 days, 11:04:00	03:36:00	1 day, 18:34:00	7 days, 16:12:00	BDL	07:21:00	BDL	BDL	00:04:00	00:58:00	00:11:00	00:50:00	00:18:00	ULdi1	EDJ1	buccal	-8 days, 5:33:00
2 days, 13:33:00	86 days, 4:16:00	2 days, 5:29:00	02:24:00	1 day, 8:57:00	7 days, 12:34:00	BDL	07:21:00	BDL	BDL	00:02:00	00:56:00	00:09:00	00:49:00	00:18:00	ULdi1	EDJ1	buccal	-8 days, 5:36:00
2 days, 21:00:00	87 days, 11:26:00	2 days, 9:38:00	03:30:00	1 day, 15:36:00	7 days, 4:17:00	BDL	07:32:00	BDL	BDL	00:01:00	00:57:00	00:11:00	00:46:00	00:19:00	ULdi1	EDJ1	buccal	-8 days, 5:39:00
3 days, 5:06:00	86 days, 12:26:00	2 days, 1:39:00	03:13:00	1 day, 10:44:00	7 days, 8:36:00	BDL	07:28:00	BDL	00:10:00	00:11:00	00:56:00	00:09:00	00:48:00	00:19:00	ULdi1	EDJ1	buccal	-8 days, 5:43:00
3 days, 12:33:00	85 days, 17:38:00	2 days, 9:24:00	03:01:00	1 day, 16:19:00	7 days, 12:32:00	BDL	08:37:00	00:08:00	00:09:00	00:29:00	00:56:00	00:11:00	00:49:00	00:23:00	ULdi1	EDJ1	buccal	-8 days, 5:46:00
3 days, 20:39:00	85 days, 10:54:00	2 days, 17:10:00	04:31:00	1 day, 12:33:00	7 days, 12:53:00	00:30:00	08:09:00	00:09:00	00:21:00	00:59:00	00:55:00	00:10:00	00:49:00	00:21:00	ULdi1	EDJ1	buccal	-8 days, 5:50:00
4 days, 4:07:00	87 days, 22:15:00	2 days, 22:35:00	04:06:00	1 day, 17:04:00	7 days, 11:47:00	00:31:00	09:07:00	00:18:00	00:18:00	00:35:00	00:57:00	00:11:00	00:49:00	00:23:00	ULdi1	EDJ1	buccal	-8 days, 5:54:00
4 days, 11:33:00	86 days, 7:21:00	2 days, 10:49:00	03:34:00	1 day, 14:31:00	7 days, 15:34:00	00:13:00	08:06:00	BDL	00:12:00	00:20:00	00:56:00	00:10:00	00:50:00	00:22:00	ULdi1	EDJ1	buccal	-8 days, 5:57:00
4 days, 19:00:00	84 days, 7:04:00	2 days, 14:42:00	03:08:00	1 day, 4:21:00	7 days, 8:54:00	BDL	08:39:00	BDL	BDL	00:26:00	00:55:00	00:08:00	00:48:00	00:22:00	ULdi1	EDJ1	buccal	-8 days, 6:01:00
5 days, 3:06:00	83 days, 2:13:00	2 days, 9:24:00	03:23:00	1 day, 7:27:00	7 days, 8:02:00	00:14:00	08:15:00	00:07:00	BDL	00:34:00	00:54:00	00:08:00	00:48:00	00:21:00	ULdi1	EDJ1	buccal	-8 days, 6:05:00
5 days, 10:33:00	85 days, 21:24:00	2 days, 12:16:00	05:03:00	1 day, 14:16:00	7 days, 12:04:00	00:20:00	09:35:00	00:08:00	00:14:00	00:59:00	00:56:00	00:10:00	00:49:00	00:24:00	ULdi1	EDJ1	buccal	-8 days, 6:09:00
5 days, 18:39:00	88 days, 15:18:00	2 days, 16:42:00	03:49:00	1 day, 18:23:00	7 days, 10:30:00	00:42:00	09:41:00	00:11:00	00:09:00	00:47:00	00:57:00	00:11:00	00:48:00	00:25:00	ULdi1	EDJ1	buccal	-8 days, 6:13:00
6 days, 2:06:00	84 days, 2:51:00	2 days, 11:31:00	04:10:00	1 day, 8:21:00	7 days, 8:29:00	00:22:00	08:31:00	BDL	BDL	00:08:00	00:55:00	00:09:00	00:48:00	00:21:00	ULdi1	EDJ1	buccal	-8 days, 6:17:00
6 days, 9:33:00	84 days, 7:30:00	2 days, 4:55:00	05:25:00	1 day, 6:17:00	7 days, 6:38:00	BDL	08:31:00	BDL	BDL	00:17:00	00:55:00	00:08:00	00:47:00	00:21:00	ULdi1	EDJ1	buccal	-8 days, 6:22:00
6 days, 17:39:00	84 days, 12:06:00	2 days, 8:21:00	05:16:00	1 day, 15:02:00	7 days, 8:10:00	BDL	08:21:00	BDL	BDL	00:18:00	00:55:00	00:10:00	00:47:00	00:22:00	ULdi1	EDJ1	buccal	-8 days, 6:26:00
7 days, 1:06:00	84 days, 5:02:00	2 days, 13:27:00	05:40:00	1 day, 16:02:00	7 days, 12:23:00	BDL	08:59:00	BDL	00:13:00	00:23:00	00:55:00	00:11:00	00:49:00	00:23:00	ULdi1	EDJ1	buccal	-8 days, 6:31:00
7 days, 8:32:00	85 days, 11:02:00	2 days, 12:10:00	06:19:00	1 day, 13:10:00	7 days, 9:56:00	BDL	09:08:00	BDL	BDL	00:28:00	00:55:00	00:10:00	00:48:00	00:25:00	ULdi1	EDJ1	buccal	-8 days, 6:35:00
7 days, 16:00:00	82 days, 2:25:00	2 days, 14:13:00	03:03:00	1 day, 10:32:00	7 days, 5:39:00	BDL	08:48:00	BDL	BDL	00:45:00	00:53:00	00:09:00	00:47:00	00:23:00	ULdi1	EDJ1	buccal	-8 days, 6:40:00
8 days, 0:06:00	84 days, 2:12:00	2 days, 14:58:00	05:12:00	1 day, 5:13:00	7 days, 9:22:00	BDL	09:16:00	BDL	BDL	00:36:00	00:55:00	00:08:00	00:48:00	00:25:00	ULdi1	EDJ1	buccal	-8 days, 6:45:00
8 days, 7:33:00	88 days, 0:08:00	2 days, 15:31:00	04:23:00	1 day, 11:29:00	7 days, 11:13:00	BDL	09:12:00	BDL	00:12:00	00:33:00	00:57:00	00:09:00	00:48:00	00:25:00	ULdi1	EDJ1	buccal	-8 days, 6:49:00
8 days, 15:39:00	87 days, 19:11:00	2 days, 11:05:00	05:26:00	1 day, 18:09:00	7 days, 10:40:00	BDL	09:16:00	BDL	00:08:00	00:37:00	00:57:00	00:11:00	00:48:00	00:25:00	ULdi1	EDJ1	buccal	-8 days, 6:54:00
8 days, 23:06:00	88 days, 22:21:00	2 days, 15:44:00	06:38:00	1 day, 18:40:00	7 days, 9:45:00	BDL	09:28:00	BDL	BDL	00:28:00	00:58:00	00:11:00	00:48:00	00:24:00	ULdi1	EDJ1	buccal	-8 days, 6:59:00
9 days, 6:32:00	87 days, 8:09:00	2 days, 15:38:00	05:24:00	1 day, 19:43:00	7 days, 14:24:00	BDL	08:12:00	BDL	BDL	00:16:00	00:57:00	00:12:00	00:49:00	00:22:00	ULdi1	EDJ1	buccal	-8 days, 6:24:00
9 days, 14:39:00	86 days, 13:14:00	2 days, 2:05:00	05:06:00	1 day, 15:19:00	7 days, 5:18:00	BDL	08:24:00	BDL	BDL	00:14:00	00:56:00	00:10:00	00:47:00	00:22:00	ULdi1	EDJ1	buccal	-8 days, 6:29:00
9 days, 22:06:00	87 days, 13:10:00	2 days, 10:00:00	04:44:00	2 days, 1:59:00	7 days, 7:18:00	BDL	08:17:00	BDL	BDL	00:02:00	00:57:00	00:13:00	00:47:00	00:22:00	ULdi1	EDJ1	buccal	-8 days, 6:35:00
10 days, 5:33:00	87 days, 5:20:00	2 days, 6:04:00	04:23:00	1 day, 12:26:00	7 days, 9:23:00	BDL	07:25:00	BDL	BDL	00:04:00	00:57:00	00:10:00	00:48:00	00:20:00	ULdi1	EDJ1	buccal	-8 days, 6:40:00
10 days, 13:39:00	90 days, 1:46:00	2 days, 10:24:00	05:18:00	1 day, 14:24:00	7 days, 8:10:00	BDL	08:05:00	BDL	BDL	00:11:00	00:58:00	00:10:00	00:47:00	00:21:00	ULdi1	EDJ1	buccal	-8 days, 6:45:00
10 days, 21:06:00	90 days, 17:44:00	2 days, 0:19:00	05:34:00	1 day, 16:24:00	7 days, 8:18:00	BDL	07:35:00	BDL	BDL	00:01:00	00:59:00	00:11:00	00:48:00	00:19:00	ULdi1	EDJ1	buccal	-8 days, 6:51:00
11 days, 4:32:00	89 days, 15:28:00	2 days, 7:10:00	04:27:00	1 day, 17:04:00	7 days, 10:28:00	BDL	07:14:00	BDL	BDL	00:01:00	00:58:00	00:11:00	00:48:00	00:18:00	ULdi1	EDJ1	buccal	-8 days, 6:56:00
11 days, 12:39:00	89 days, 2:38:00	2 days, 5:02:00	05:24:00	1 day, 18:35:00	7 days, 6:12:00	BDL	07:22:00	BDL	BDL	00:05:00	00:58:00	00:11:00	00:47:00	00:20:00	ULdi1	EDJ1	buccal	-8 days, 7:02:00
11 days, 20:05:00	90 days, 7:55:00	2 days, 7:06:00	04:22:00	1 day, 9:19:00	7 days, 9:37:00	BDL	07:45:00	BDL	00:11:00	00:09:00	00:59:00	00:09:00	00:48:00	00:20:00	ULdi1	EDJ1	buccal	-8 days, 7:08:00
12 days, 3:32:00	85 days, 12:44:00	2 days, 7:25:00	04:27:00	1 day, 13:26:00	7 days, 10:02:00	BDL	10:01:00	BDL	BDL	00:24:00	00:55:00	00:10:00	00:48:00	00:26:00	ULdi1	EDJ1	buccal	-8 days, 7:14:00
12 days, 11:39:00	85 days, 21:10:00	2 days, 8:27:00	03:50:00	1 day, 11:06:00	7 days, 5:50:00	BDL	11:02:00	BDL	00:10:00	00:24:00	00:56:00	00:09:00	00:47:00	00:29:00	ULdi1	EDJ1	buccal	-8 days, 7:19:00
12 days, 19:05:00	89 days, 9:11:00	2 days, 10:11:00	04:04:00	1 day, 15:04:00	7 days, 8:06:00	BDL	11:31:00	BDL	BDL	00:40:00	00:58:00	00:10:00	00:48:00	00:31:00	ULdi1	EDJ1	buccal	-8 days, 7:25:00
13 days, 2:33:00	86 days, 3:37:00	2 days, 13:23:00	04:31:00	1 day, 8:08:00	7 days, 11:32:00	BDL	12:30:00	BDL	BDL	00:34:00	00:56:00	00:09:00	00:48:00	00:33:00	ULdi1	EDJ1	buccal	-8 days, 7:31:00
13 days, 10:39:00	87 days, 13:26:00	2 days, 9:51:00	04:06:00	1 day, 7:15:00	7 days, 9:40:00	BDL	12:19:00	BDL	00:12:00	00:28:00	00:57:00	00:08:00	00:48:00	00:32:00	ULdi1	EDJ1	buccal	-8 days, 7:38:00
13 days, 18:05:00	88 days, 16:37:00	2 days, 10:35:00	04:08:00	1 day, 13:02:00	7 days, 14:44:00	BDL	12:14:00	BDL	00:18:00	00:24:00	00:58:00	00:10:00	00:49:00	00:33:00	ULdi1	EDJ1	buccal	-8 days, 7:44:00
14 days, 1:32:00	88 days, 14:02:00	2 days, 7:24:00	04:09:00	1 day, 7:39:00	7 days, 7:59:00	BDL	12:20:00	BDL	00:21:00	00:14:00	00:57:00	00:08:00	00:47:00	00:32:00	ULdi1	EDJ1	buccal	-8 days, 7:50:00
14 days, 9:39:00	90 days, 17:09:00	2 days, 15:15:00	03:09:00	1 day, 3:07:00	7 days, 10:27:00	BDL	11:35:00	BDL	BDL	00:11:00	00:59:00	00:07:00	00:48:00	00:30:00	ULdi1	EDJ1	buccal	-8 days, 7:57:00
14 days, 17:05:00	88 days, 22:51:00	2 days, 5:32:00	03:55:00	1 day, 18:06:00	7 days, 9:24:00	BDL	10:26:00	BDL	00:28:00	00:17:00	00:58:00	00:11:00	00:48:00	00:28:00	ULdi1	EDJ1	buccal	-8 days, 7:23:00
15 days, 0:32:00	90 days, 23:23:00	2 days, 10:19:00	03:18:00	1 day, 11:13:00	7 days, 16:55:00	00:12:00	10:48:00	BDL	00:20:00	00:28:00	00:59:00	00:09:00	00:50:00	00:28:00	ULdi1	EDJ1	buccal	-8 days, 7:30:00
15 days, 8:39:00	92 days, 18:26:00	2 days, 10:28:00	03:38:00	1 day, 15:24:00	7 days, 13:16:00	BDL	11:22:00	BDL	00:21:00	00:31:00	01:00:00	00:11:00	00:49:00	00:29:00	ULdi1	EDJ1	buccal	-8 days, 7:36:00
15 days, 16:06:00	89 days, 6:24:00	2 days, 7:03:00	03:26:00	1 day, 14:28:00	7 days, 14:20:00	BDL	10:38:00	BDL	BDL	00:19:00	00:58:00	00:10:00	00:49:00	00:28:00	ULdi1	EDJ1	buccal	-8 days, 7:43:00
15 days, 23:32:00	89 days, 20:26:00	2 days, 2:38:00	04:14:00	1 day, 5:16:00	7 days, 11:22:00	BDL	10:19:00	BDL	BDL	00:43:00	00:58:00	00:08:00	00:48:00	00:28:00	ULdi1	EDJ1	buccal	-8 days, 7:50:00
16 days, 7:39:00	90 days, 17:07:00	2 days, 16:38:00	02:16:00	1 day, 8:09:00	7 days, 11:08:00	00:09:00	10:36:00	BDL	00:10:00	00:20:00	00:59:00	00:09:00	00:48:00	00:27:00	ULdi1	EDJ1	buccal	-8 days, 7:57:00
16 days, 15:05:00	85 days, 21:09:00	2 days, 5:16:00	03:10:00	1 day, 14:52:00	7 days, 7:13:00	BDL	09:15:00	BDL	BDL	00:09:00	00:56:00	00:10:00	00:47:00	00:24:00	ULdi1	EDJ1	buccal	-8 days, 8:04:00
16 days, 22:32:00	87 days, 21:53:00	2 days, 10:38:00	02:54:00	1 day, 4:22:00	7 days, 9:42:00	BDL	09:12:00	BDL	00:08:00	00:06:00	00:57:00	00:08:00	00:48:00	00:24:00	ULdi1	EDJ1	buccal	-8 days, 8:11:00
17 days, 6:38:00	86 days, 18:19:00	1 day, 21:27:00	02:35:00	1 day, 9:01:00	7 days, 7:04:00	BDL	09:19:00	BDL	BDL	00:08:00	00:56:00	00:09:00	00:47:00	00:24:00	ULdi1	EDJ1	buccal	-8 days, 8:18:00
17 days, 14:05:00	87 days, 1:14:00	2 days, 7:19:00	02:25:00	1 day, 9:24:00	7 days, 11:50:00	BDL	07:32:00	BDL	BDL	00:07:00	00:56:00	00:09:00	00:49:00	00:20:00	ULdi1	EDJ1	buccal	-8 days, 8:25:00
17 days, 21:32:00	93 days, 18:28:00	2 days, 9:55:00	03:31:00	1 day, 10:22:00	7 days, 13:15:00	BDL	09:31:00	BDL	BDL	00:21:00	01:01:00	00:09:00	00:49:00	00:25:00	ULdi1	EDJ1	buccal	-8 days, 8:33:00
18 days, 5:39:00	85 days, 13:25:00	2 days, 0:13:00	03:41:00	1 day, 11:26:00	7 days, 14:07:00	BDL	09:23:00	BDL	BDL	00:15:00	00:55:00	00:10:00	00:49:00	00:25:00	ULdi1	EDJ1	buccal	-8 days, 8:40:00
18 days, 13:05:00	88 days, 14:13:00	1 day, 17:49:00	03:55:00	1 day, 10:53:00	7 days, 12:22:00	BDL	10:20:00	BDL	BDL	00:21:00	00:57:00	00:09:00	00:49:00	00:26:00	ULdi1	EDJ1	buccal	-8 days, 8:47:00
18 days, 20:32:00	85 days, 9:29:00	2 days, 0:06:00	03:03:00	1 day, 11:16:00	7 days, 8:19:00	BDL	09:18:00	BDL	00:10:00	00:17:00	00:55:00	00:10:00	00:48:00	00:25:00	ULdi1	EDJ1	buccal	-8 days, 8:55:00
19 days, 4:38:00	91 days, 0:33:00	2 days, 7:27:00	03:25:00	1 day, 9:35:00	7 days, 9:59:00	BDL	10:17:00	BDL	BDL	00:23:00	00:59:00	00:09:00	00:48:00	00:27:00	ULdi1	EDJ1	buccal	-8 days, 8:23:00
19 days, 12:05:00	88 days, 14:28:00	2 days, 7:39:00	02:35:00	1 day, 0:47:00	7 days, 15:28:00	BDL	11:39:00	BDL	BDL	00:21:00	00:57:00	00:07:00	00:49:00	00:30:00	ULdi1	EDJ1	buccal	-8 days, 8:30:00
19 days, 19:32:00	88 days, 13:31:00	1 day, 17:47:00	03:32:00	1 day, 13:43:00	7 days, 13:35:00	BDL	11:23:00	BDL	BDL	00:47:00	00:57:00	00:10:00	00:49:00	00:29:00	ULdi1	EDJ1	buccal	-8 days, 8:38:00
20 days, 3:38:00	84 days, 3:16:00	2 days, 1:11:00	03:24:00	1 day, 12:22:00	7 days, 16:54:00	BDL	10:57:00	BDL	BDL	00:25:00	00:55:00	00:10:00	00:50:00	00:29:00	ULdi1	EDJ1	buccal	-8 days, 8:46:00
20 days, 11:05:00	86 days, 2:21:00	2 days, 10:29:00	02:37:00	1 day, 16:14:00	7 days, 11:18:00	BDL	10:49:00	BDL	BDL	00:37:00	00:56:00	00:11:00	00:48:00	00:28:00	ULdi1	EDJ1	buccal	-8 days, 8:54:00
20 days, 18:31:00	85 days, 6:34:00	2 days, 9:08:00	03:47:00	1 day, 16:08:00	7 days, 13:03:00	BDL	11:27:00	BDL	00:08:00	00:33:00	00:55:00	00:11:00	00:49:00	00:29:00	ULdi1	EDJ1	buccal	-8 days, 9:02:00
21 days, 2:39:00	86 days, 22:46:00	2 days, 10:13:00	02:54:00	1 day, 12:29:00	7 days, 12:55:00	BDL	11:00:00	BDL	BDL	00:29:00	00:56:00	00:10:00	00:49:00	00:29:00	ULdi1	EDJ1	buccal	-8 days, 9:10:00
21 days, 10:05:00	83 days, 21:06:00	2 days, 15:01:00	02:37:00	1 day, 5:43:00	7 days, 10:37:00	BDL	11:38:00	BDL	BDL	00:36:00	00:54:00	00:08:00	00:48:00	00:30:00	ULdi1	EDJ1	buccal	-8 days, 9:18:00
21 days, 17:32:00	87 days, 18:15:00	2 days, 8:00:00	04:30:00	1 day, 9:06:00	7 days, 11:06:00	BDL	09:51:00	BDL	00:10:00	00:19:00	00:57:00	00:09:00	00:48:00	00:26:00	ULdi1	EDJ1	buccal	-8 days, 9:27:00
22 days, 1:38:00	87 days, 0:28:00	2 days, 13:12:00	03:21:00	1 day, 17:45:00	7 days, 17:23:00	BDL	12:01:00	BDL	BDL	00:32:00	00:56:00	00:11:00	00:50:00	00:31:00	ULdi1	EDJ1	buccal	-8 days, 9:35:00
22 days, 9:05:00	88 days, 4:02:00	2 days, 15:05:00	03:33:00	1 day, 7:29:00	7 days, 13:31:00	BDL	10:57:00	BDL	00:11:00	00:31:00	00:57:00	00:08:00	00:49:00	00:29:00	ULdi1	EDJ1	buccal	-8 days, 9:44:00
22 days, 16:31:00	86 days, 12:35:00	2 days, 15:10:00	02:34:00	1 day, 7:51:00	7 days, 14:00:00	BDL	10:07:00	BDL	00:08:00	00:32:00	00:56:00	00:09:00	00:49:00	00:27:00	ULdi1	EDJ1	buccal	-8 days, 9:52:00
23 days, 0:38:00	85 days, 12:22:00	2 days, 3:32:00	02:51:00	1 day, 9:53:00	7 days, 10:10:00	BDL	09:31:00	BDL	00:12:00	00:26:00	00:55:00	00:09:00	00:48:00	00:24:00	ULdi1	EDJ1	buccal	-8 days, 9:21:00
23 days, 8:05:00	87 days, 19:45:00	2 days, 8:19:00	03:28:00	1 day, 12:14:00	7 days, 13:59:00	BDL	09:24:00	BDL	BDL	00:33:00	00:57:00	00:10:00	00:49:00	00:25:00	ULdi1	EDJ1	buccal	-8 days, 9:30:00
23 days, 15:32:00	87 days, 19:19:00	2 days, 2:56:00	03:02:00	1 day, 7:47:00	7 days, 13:13:00	BDL	10:30:00	BDL	00:08:00	00:21:00	00:57:00	00:09:00	00:49:00	00:27:00	ULdi1	EDJ1	buccal	-8 days, 9:38:00
23 days, 23:38:00	91 days, 14:43:00	2 days, 10:11:00	03:13:00	1 day, 12:34:00	7 days, 17:41:00	BDL	10:24:00	BDL	00:13:00	00:18:00	00:59:00	00:10:00	00:50:00	00:27:00	ULdi1	EDJ1	buccal	-8 days, 9:47:00
24 days, 7:05:00	85 days, 12:42:00	2 days, 1:23:00	02:34:00	1 day, 12:21:00	7 days, 8:34:00	BDL	09:27:00	BDL	BDL	00:23:00	00:55:00	00:10:00	00:48:00	00:24:00	ULdi1	EDJ1	buccal	-8 days, 9:56:00
24 days, 14:31:00	87 days, 9:33:00	2 days, 6:14:00	02:30:00	1 day, 6:42:00	7 days, 18:06:00	BDL	09:47:00	BDL	00:08:00	00:32:00	00:57:00	00:08:00	00:50:00	00:26:00	ULdi1	EDJ1	buccal	-8 days, 10:05:00
24 days, 22:38:00	88 days, 16:45:00	2 days, 5:58:00	03:32:00	1 day, 18:59:00	7 days, 15:34:00	BDL	08:57:00	BDL	00:09:00	00:21:00	00:58:00	00:12:00	00:49:00	00:23:00	ULdi1	EDJ1	buccal	-8 days, 10:14:00
25 days, 6:04:00	88 days, 7:14:00	2 days, 2:10:00	03:27:00	1 day, 10:35:00	7 days, 13:15:00	BDL	08:07:00	BDL	00:09:00	00:26:00	00:57:00	00:09:00	00:49:00	00:21:00	ULdi1	EDJ1	buccal	-8 days, 10:24:00
25 days, 13:31:00	90 days, 0:06:00	2 days, 0:13:00	BDL	1 day, 4:58:00	7 days, 9:20:00	BDL	07:30:00	BDL	BDL	00:03:00	00:58:00	00:08:00	00:48:00	00:19:00	ULdi1	EDJ1	buccal	-8 days, 10:33:00
25 days, 21:38:00	90 days, 23:12:00	2 days, 3:31:00	BDL	1 day, 10:08:00	7 days, 12:24:00	BDL	07:21:00	BDL	BDL	00:08:00	00:59:00	00:09:00	00:49:00	00:18:00	ULdi1	EDJ1	buccal	-8 days, 10:42:00
26 days, 5:04:00	89 days, 6:49:00	1 day, 21:55:00	BDL	1 day, 15:24:00	7 days, 15:12:00	BDL	07:24:00	BDL	BDL	00:03:00	00:58:00	00:10:00	00:49:00	00:18:00	ULdi1	EDJ1	buccal	-8 days, 10:52:00
26 days, 12:32:00	89 days, 20:20:00	2 days, 1:27:00	03:13:00	1 day, 12:15:00	7 days, 8:29:00	BDL	07:27:00	BDL	00:11:00	00:04:00	00:58:00	00:10:00	00:48:00	00:19:00	ULdi1	EDJ1	buccal	-8 days, 10:21:00
26 days, 20:38:00	89 days, 17:28:00	2 days, 3:05:00	02:22:00	1 day, 4:58:00	7 days, 7:33:00	BDL	05:53:00	BDL	BDL	00:05:00	00:58:00	00:08:00	00:47:00	00:15:00	ULdi1	EDJ1	buccal	-8 days, 10:31:00
27 days, 4:04:00	90 days, 21:06:00	1 day, 23:20:00	02:43:00	1 day, 9:28:00	7 days, 10:48:00	BDL	06:24:00	BDL	00:13:00	00:01:00	00:59:00	00:09:00	00:48:00	00:17:00	ULdi1	EDJ1	buccal	-8 days, 10:41:00
27 days, 11:31:00	89 days, 20:41:00	2 days, 4:24:00	02:15:00	1 day, 11:37:00	7 days, 14:41:00	BDL	06:25:00	BDL	BDL	00:10:00	00:58:00	00:10:00	00:49:00	00:17:00	ULdi1	EDJ1	buccal	-8 days, 10:50:00
27 days, 19:38:00	90 days, 1:37:00	2 days, 0:35:00	02:30:00	1 day, 5:13:00	7 days, 10:36:00	BDL	05:53:00	BDL	BDL	00:01:00	00:58:00	00:08:00	00:48:00	00:15:00	ULdi1	EDJ1	buccal	-8 days, 11:00:00
28 days, 3:04:00	92 days, 15:56:00	1 day, 18:30:00	02:11:00	1 day, 8:57:00	7 days, 10:10:00	BDL	06:37:00	BDL	BDL	BDL	01:00:00	00:09:00	00:48:00	00:16:00	ULdi1	EDJ1	buccal	-8 days, 11:10:00
28 days, 10:31:00	92 days, 15:06:00	1 day, 16:39:00	02:10:00	1 day, 13:16:00	7 days, 10:25:00	BDL	05:25:00	BDL	BDL	BDL	01:00:00	00:10:00	00:48:00	00:14:00	ULdi1	EDJ1	buccal	-8 days, 11:20:00
28 days, 18:38:00	89 days, 12:45:00	1 day, 18:18:00	03:02:00	1 day, 14:15:00	7 days, 11:11:00	BDL	06:29:00	BDL	BDL	00:03:00	00:58:00	00:10:00	00:48:00	00:16:00	ULdi1	EDJ1	buccal	-8 days, 11:30:00
29 days, 2:05:00	89 days, 5:12:00	1 day, 15:39:00	03:24:00	1 day, 10:35:00	7 days, 10:41:00	BDL	05:37:00	BDL	BDL	BDL	00:58:00	00:09:00	00:48:00	00:15:00	ULdi1	EDJ1	buccal	-8 days, 11:41:00
29 days, 9:31:00	89 days, 16:23:00	1 day, 17:49:00	BDL	1 day, 4:36:00	7 days, 9:38:00	BDL	05:25:00	BDL	BDL	BDL	00:58:00	00:08:00	00:48:00	00:14:00	ULdi1	EDJ1	buccal	-8 days, 11:51:00
29 days, 17:38:00	89 days, 16:07:00	1 day, 23:28:00	BDL	1 day, 9:44:00	7 days, 12:30:00	BDL	04:57:00	BDL	00:08:00	BDL	00:58:00	00:09:00	00:49:00	00:12:00	ULdi1	EDJ1	buccal	-8 days, 11:21:00
30 days, 1:04:00	92 days, 13:02:00	1 day, 23:05:00	BDL	1 day, 6:30:00	7 days, 13:32:00	BDL	05:08:00	BDL	00:09:00	BDL	01:00:00	00:08:00	00:49:00	00:14:00	ULdi1	EDJ1	buccal	-8 days, 11:32:00
30 days, 8:31:00	88 days, 22:39:00	1 day, 23:59:00	BDL	1 day, 5:21:00	7 days, 9:30:00	BDL	04:41:00	BDL	BDL	BDL	00:58:00	00:08:00	00:48:00	00:12:00	ULdi1	EDJ1	buccal	-8 days, 11:42:00
30 days, 16:37:00	91 days, 9:22:00	1 day, 21:44:00	BDL	1 day, 8:12:00	7 days, 13:15:00	BDL	05:17:00	BDL	00:08:00	BDL	00:59:00	00:09:00	00:49:00	00:14:00	ULdi1	EDJ1	buccal	-8 days, 11:53:00
31 days, 0:04:00	90 days, 3:13:00	1 day, 14:46:00	02:23:00	1 day, 4:16:00	7 days, 12:13:00	BDL	05:28:00	BDL	BDL	BDL	00:58:00	00:08:00	00:49:00	00:13:00	ULdi1	EDJ1	buccal	-8 days, 12:03:00
31 days, 7:31:00	89 days, 12:23:00	1 day, 11:32:00	BDL	1 day, 3:05:00	7 days, 9:25:00	BDL	05:25:00	BDL	BDL	00:01:00	00:58:00	00:07:00	00:48:00	00:14:00	ULdi1	EDJ1	buccal	-8 days, 12:14:00
31 days, 15:38:00	91 days, 5:11:00	1 day, 16:48:00	02:36:00	1 day, 8:55:00	7 days, 8:06:00	BDL	06:34:00	BDL	BDL	BDL	00:59:00	00:09:00	00:48:00	00:16:00	ULdi1	EDJ1	buccal	-8 days, 12:25:00
31 days, 23:04:00	88 days, 4:07:00	1 day, 13:51:00	02:18:00	1 day, 9:26:00	7 days, 15:13:00	BDL	07:11:00	BDL	BDL	00:01:00	00:57:00	00:09:00	00:49:00	00:18:00	ULdi1	EDJ1	buccal	-8 days, 12:36:00
32 days, 6:31:00	82 days, 21:34:00	1 day, 13:56:00	BDL	1 day, 6:31:00	7 days, 5:43:00	BDL	07:08:00	BDL	00:09:00	BDL	00:54:00	00:08:00	00:47:00	00:18:00	ULdi1	EDJ1	buccal	-8 days, 12:47:00
32 days, 14:37:00	89 days, 5:30:00	1 day, 21:29:00	BDL	1 day, 12:11:00	7 days, 11:32:00	BDL	07:14:00	BDL	BDL	00:02:00	00:58:00	00:10:00	00:48:00	00:19:00	ULdi1	EDJ1	buccal	-8 days, 12:58:00
32 days, 22:04:00	85 days, 11:09:00	1 day, 18:03:00	02:21:00	1 day, 12:35:00	7 days, 7:44:00	BDL	07:06:00	BDL	BDL	00:02:00	00:55:00	00:10:00	00:47:00	00:18:00	ULdi1	EDJ1	buccal	-8 days, 12:29:00
33 days, 5:31:00	86 days, 11:37:00	1 day, 18:25:00	BDL	1 day, 7:27:00	7 days, 13:44:00	BDL	07:06:00	BDL	BDL	00:01:00	00:56:00	00:08:00	00:49:00	00:18:00	ULdi1	EDJ1	buccal	-8 days, 12:40:00
33 days, 13:37:00	87 days, 3:38:00	1 day, 18:12:00	BDL	1 day, 10:14:00	7 days, 10:54:00	BDL	06:11:00	BDL	BDL	00:01:00	00:57:00	00:09:00	00:48:00	00:15:00	ULdi1	EDJ1	buccal	-8 days, 12:52:00
33 days, 21:04:00	89 days, 9:28:00	1 day, 17:30:00	02:32:00	1 day, 9:09:00	7 days, 10:14:00	BDL	06:01:00	BDL	BDL	BDL	00:58:00	00:09:00	00:48:00	00:15:00	ULdi1	EDJ1	buccal	-8 days, 13:03:00
34 days, 4:30:00	86 days, 22:14:00	1 day, 19:07:00	BDL	1 day, 3:28:00	7 days, 7:39:00	BDL	05:37:00	BDL	00:08:00	00:01:00	00:56:00	00:07:00	00:47:00	00:15:00	ULdi1	EDJ1	buccal	-8 days, 13:15:00
34 days, 12:38:00	88 days, 7:41:00	1 day, 13:20:00	BDL	1 day, 3:28:00	7 days, 6:18:00	BDL	06:11:00	BDL	BDL	00:01:00	00:57:00	00:07:00	00:47:00	00:15:00	ULdi1	EDJ1	buccal	-8 days, 13:26:00
34 days, 20:04:00	87 days, 17:07:00	1 day, 18:11:00	BDL	1 day, 5:26:00	7 days, 15:57:00	BDL	06:04:00	BDL	BDL	00:01:00	00:57:00	00:08:00	00:50:00	00:16:00	ULdi1	EDJ1	buccal	-8 days, 13:38:00
35 days, 3:31:00	89 days, 23:18:00	1 day, 22:08:00	BDL	1 day, 8:12:00	7 days, 19:06:00	BDL	06:54:00	BDL	BDL	BDL	00:58:00	00:09:00	00:50:00	00:18:00	ULdi1	EDJ1	buccal	-8 days, 13:50:00
35 days, 11:37:00	86 days, 5:01:00	1 day, 21:07:00	02:06:00	1 day, 1:25:00	7 days, 9:00:00	BDL	06:38:00	BDL	BDL	BDL	00:56:00	00:07:00	00:48:00	00:16:00	ULdi1	EDJ1	buccal	-8 days, 13:21:00
35 days, 19:04:00	87 days, 3:09:00	1 day, 18:29:00	BDL	1 day, 1:59:00	7 days, 7:50:00	BDL	05:44:00	BDL	BDL	BDL	00:57:00	00:07:00	00:47:00	00:15:00	ULdi1	EDJ1	buccal	-8 days, 13:33:00
36 days, 2:30:00	91 days, 20:40:00	1 day, 15:51:00	02:29:00	1 day, 10:32:00	7 days, 9:42:00	BDL	05:51:00	BDL	BDL	BDL	01:00:00	00:09:00	00:48:00	00:15:00	ULdi1	EDJ1	buccal	-8 days, 13:45:00
36 days, 10:37:00	90 days, 5:39:00	1 day, 9:11:00	BDL	1 day, 8:06:00	7 days, 13:19:00	BDL	06:02:00	BDL	BDL	BDL	00:59:00	00:09:00	00:49:00	00:15:00	ULdi1	EDJ1	buccal	-8 days, 13:57:00
36 days, 18:04:00	87 days, 19:54:00	1 day, 21:17:00	BDL	1 day, 5:22:00	7 days, 15:40:00	BDL	06:31:00	BDL	BDL	BDL	00:57:00	00:08:00	00:50:00	00:16:00	ULdi1	EDJ1	buccal	-8 days, 14:09:00
37 days, 1:31:00	86 days, 4:46:00	1 day, 17:10:00	BDL	1 day, 2:58:00	7 days, 12:34:00	BDL	06:07:00	BDL	BDL	BDL	00:56:00	00:07:00	00:49:00	00:15:00	ULdi1	EDJ1	buccal	-8 days, 14:22:00
37 days, 9:37:00	86 days, 21:33:00	1 day, 12:30:00	BDL	1 day, 5:53:00	7 days, 11:58:00	BDL	05:10:00	BDL	BDL	BDL	00:56:00	00:08:00	00:49:00	00:14:00	ULdi1	EDJ1	buccal	-8 days, 14:34:00
37 days, 17:04:00	85 days, 17:39:00	1 day, 11:07:00	BDL	1 day, 4:21:00	7 days, 12:39:00	BDL	05:38:00	BDL	BDL	BDL	00:56:00	00:08:00	00:49:00	00:13:00	ULdi1	EDJ1	buccal	-8 days, 14:46:00
38 days, 0:30:00	87 days, 6:37:00	1 day, 13:00:00	BDL	1 day, 3:15:00	7 days, 10:04:00	BDL	05:37:00	BDL	BDL	BDL	00:57:00	00:07:00	00:48:00	00:13:00	ULdi1	EDJ1	buccal	-8 days, 14:59:00
38 days, 8:37:00	89 days, 7:36:00	1 day, 10:57:00	BDL	1 day, 3:00:00	7 days, 11:07:00	BDL	05:37:00	BDL	BDL	BDL	00:58:00	00:07:00	00:48:00	00:13:00	ULdi1	EDJ1	buccal	-8 days, 14:31:00
38 days, 16:03:00	89 days, 20:12:00	1 day, 15:17:00	BDL	1 day, 3:24:00	7 days, 14:56:00	BDL	05:14:00	BDL	BDL	BDL	00:58:00	00:07:00	00:49:00	00:13:00	ULdi1	EDJ1	buccal	-8 days, 14:44:00
38 days, 23:30:00	84 days, 3:24:00	1 day, 13:12:00	BDL	1 day, 5:09:00	7 days, 11:44:00	BDL	05:20:00	BDL	BDL	BDL	00:55:00	00:08:00	00:48:00	00:13:00	ULdi1	EDJ1	buccal	-8 days, 14:57:00
39 days, 7:37:00	88 days, 5:23:00	1 day, 15:08:00	BDL	20:35:00	7 days, 11:39:00	BDL	04:58:00	BDL	BDL	BDL	00:57:00	00:05:00	00:48:00	00:12:00	ULdi1	EDJ1	buccal	-8 days, 15:09:00
39 days, 15:03:00	91 days, 13:08:00	1 day, 18:59:00	BDL	1 day, 9:20:00	7 days, 18:33:00	BDL	05:22:00	BDL	BDL	BDL	00:59:00	00:09:00	00:50:00	00:13:00	ULdi1	EDJ1	buccal	-8 days, 15:22:00
39 days, 22:31:00	91 days, 0:33:00	1 day, 14:43:00	BDL	1 day, 0:30:00	7 days, 10:59:00	BDL	05:37:00	BDL	BDL	00:01:00	00:59:00	00:06:00	00:48:00	00:13:00	ULdi1	EDJ1	buccal	-8 days, 15:35:00
40 days, 6:37:00	88 days, 20:47:00	1 day, 6:22:00	BDL	1 day, 3:35:00	7 days, 13:38:00	00:11:00	05:20:00	BDL	BDL	BDL	00:58:00	00:07:00	00:49:00	00:13:00	ULdi1	EDJ1	buccal	-8 days, 15:48:00
40 days, 14:03:00	90 days, 11:14:00	1 day, 21:19:00	BDL	1 day, 7:24:00	7 days, 10:16:00	BDL	05:14:00	BDL	BDL	BDL	00:59:00	00:08:00	00:48:00	00:13:00	ULdi1	EDJ1	buccal	-8 days, 15:21:00
40 days, 21:30:00	85 days, 23:47:00	1 day, 14:34:00	BDL	1 day, 9:04:00	7 days, 10:22:00	BDL	04:29:00	BDL	BDL	BDL	00:56:00	00:09:00	00:48:00	00:12:00	ULdi1	EDJ1	buccal	-8 days, 15:34:00
41 days, 5:37:00	89 days, 9:22:00	1 day, 17:28:00	02:26:00	1 day, 16:40:00	7 days, 7:53:00	BDL	05:04:00	BDL	BDL	BDL	00:58:00	00:11:00	00:47:00	00:13:00	ULdi1	EDJ1	buccal	-8 days, 15:48:00
41 days, 13:03:00	82 days, 17:09:00	1 day, 10:21:00	BDL	21:43:00	7 days, 8:16:00	BDL	04:02:00	BDL	BDL	BDL	00:54:00	00:06:00	00:48:00	00:11:00	ULdi1	EDJ1	buccal	-8 days, 16:01:00
41 days, 20:30:00	84 days, 1:36:00	1 day, 9:27:00	02:39:00	1 day, 5:59:00	7 days, 6:29:00	BDL	05:05:00	BDL	BDL	BDL	00:55:00	00:08:00	00:47:00	00:13:00	ULdi1	EDJ1	buccal	-8 days, 16:14:00
42 days, 4:37:00	84 days, 22:00:00	1 day, 8:24:00	BDL	1 day, 1:38:00	7 days, 5:40:00	BDL	04:13:00	BDL	00:08:00	BDL	00:55:00	00:07:00	00:47:00	00:10:00	ULdi1	EDJ1	buccal	-8 days, 16:28:00
42 days, 12:04:00	86 days, 2:35:00	1 day, 13:17:00	BDL	23:27:00	7 days, 16:42:00	BDL	03:56:00	BDL	BDL	BDL	00:56:00	00:06:00	00:50:00	00:10:00	ULdi1	EDJ1	buccal	-8 days, 16:41:00
42 days, 19:30:00	83 days, 15:10:00	1 day, 17:26:00	BDL	1 day, 4:30:00	7 days, 8:12:00	BDL	04:42:00	BDL	BDL	BDL	00:54:00	00:08:00	00:48:00	00:12:00	ULdi1	EDJ1	buccal	-8 days, 16:55:00
43 days, 3:37:00	87 days, 16:26:00	1 day, 15:44:00	BDL	1 day, 12:15:00	7 days, 12:37:00	BDL	04:21:00	BDL	BDL	BDL	00:57:00	00:10:00	00:49:00	00:10:00	ULdi1	EDJ1	buccal	-8 days, 16:29:00
43 days, 11:03:00	82 days, 2:11:00	1 day, 11:32:00	02:00:00	1 day, 3:40:00	7 days, 7:54:00	BDL	04:01:00	00:07:00	BDL	BDL	00:53:00	00:07:00	00:47:00	00:11:00	ULdi1	EDJ1	buccal	-8 days, 16:43:00
43 days, 18:30:00	85 days, 17:23:00	1 day, 9:30:00	02:31:00	1 day, 0:19:00	7 days, 11:14:00	BDL	04:21:00	BDL	BDL	00:01:00	00:56:00	00:07:00	00:48:00	00:11:00	ULdi1	EDJ1	buccal	-8 days, 16:56:00
44 days, 2:36:00	86 days, 1:24:00	1 day, 19:43:00	BDL	1 day, 14:21:00	7 days, 9:59:00	BDL	05:21:00	BDL	BDL	BDL	00:56:00	00:10:00	00:48:00	00:13:00	ULdi1	EDJ1	buccal	-8 days, 17:10:00
44 days, 10:03:00	85 days, 14:35:00	1 day, 15:22:00	BDL	1 day, 0:30:00	7 days, 8:09:00	BDL	04:02:00	BDL	BDL	BDL	00:56:00	00:06:00	00:48:00	00:11:00	ULdi1	EDJ1	buccal	-8 days, 17:24:00
44 days, 17:30:00	89 days, 23:37:00	1 day, 17:11:00	BDL	1 day, 2:40:00	7 days, 14:31:00	BDL	05:14:00	BDL	BDL	BDL	00:58:00	00:07:00	00:49:00	00:13:00	ULdi1	EDJ1	buccal	-8 days, 17:38:00
45 days, 1:37:00	84 days, 12:17:00	1 day, 21:25:00	BDL	1 day, 6:00:00	7 days, 8:28:00	BDL	04:44:00	BDL	00:08:00	BDL	00:55:00	00:08:00	00:48:00	00:12:00	ULdi1	EDJ1	buccal	-8 days, 17:53:00
45 days, 9:03:00	88 days, 19:49:00	1 day, 15:31:00	BDL	1 day, 21:28:00	7 days, 18:15:00	BDL	04:29:00	BDL	BDL	BDL	00:58:00	00:12:00	00:50:00	00:12:00	ULdi1	EDJ1	buccal	-8 days, 17:27:00
45 days, 16:30:00	86 days, 11:38:00	1 day, 15:09:00	BDL	1 day, 8:20:00	7 days, 9:41:00	BDL	05:07:00	BDL	00:11:00	00:01:00	00:56:00	00:09:00	00:48:00	00:14:00	ULdi1	EDJ1	buccal	-8 days, 17:41:00
46 days, 0:36:00	84 days, 13:25:00	1 day, 21:13:00	BDL	1 day, 5:22:00	7 days, 14:30:00	BDL	05:17:00	BDL	BDL	00:01:00	00:55:00	00:08:00	00:49:00	00:14:00	ULdi1	EDJ1	buccal	-8 days, 17:56:00
46 days, 8:03:00	84 days, 14:22:00	1 day, 18:25:00	BDL	1 day, 2:01:00	7 days, 13:25:00	BDL	05:09:00	BDL	BDL	BDL	00:55:00	00:07:00	00:49:00	00:14:00	ULdi1	EDJ1	buccal	-8 days, 18:10:00
46 days, 15:30:00	84 days, 7:24:00	1 day, 11:06:00	BDL	1 day, 6:45:00	7 days, 11:56:00	BDL	05:30:00	BDL	BDL	BDL	00:55:00	00:08:00	00:49:00	00:13:00	ULdi1	EDJ1	buccal	-8 days, 18:25:00
46 days, 23:36:00	84 days, 14:41:00	1 day, 9:16:00	BDL	22:36:00	7 days, 14:00:00	BDL	05:34:00	BDL	BDL	BDL	00:55:00	00:06:00	00:49:00	00:13:00	ULdi1	EDJ1	buccal	-8 days, 18:39:00
47 days, 7:03:00	85 days, 20:33:00	1 day, 12:21:00	BDL	1 day, 1:09:00	7 days, 11:35:00	BDL	05:03:00	BDL	BDL	BDL	00:56:00	00:07:00	00:48:00	00:14:00	ULdi1	EDJ1	buccal	-8 days, 18:54:00
47 days, 14:29:00	82 days, 13:02:00	1 day, 8:04:00	BDL	1 day, 5:48:00	7 days, 9:00:00	BDL	05:35:00	BDL	BDL	BDL	00:54:00	00:08:00	00:48:00	00:13:00	ULdi1	EDJ1	buccal	-8 days, 18:29:00
47 days, 22:37:00	80 days, 4:23:00	1 day, 12:40:00	BDL	1 day, 6:26:00	7 days, 10:00:00	BDL	05:35:00	BDL	BDL	BDL	00:52:00	00:08:00	00:48:00	00:13:00	ULdi1	EDJ1	buccal	-8 days, 18:44:00
48 days, 6:03:00	81 days, 8:00:00	1 day, 15:07:00	BDL	1 day, 5:37:00	7 days, 12:43:00	BDL	05:46:00	BDL	00:08:00	BDL	00:53:00	00:08:00	00:49:00	00:15:00	ULdi1	EDJ1	buccal	-8 days, 18:59:00
48 days, 13:30:00	81 days, 6:01:00	1 day, 8:47:00	BDL	22:59:00	7 days, 12:36:00	BDL	06:18:00	BDL	BDL	BDL	00:53:00	00:06:00	00:49:00	00:16:00	ULdi1	EDJ1	buccal	-8 days, 19:14:00
48 days, 21:36:00	80 days, 5:01:00	1 day, 15:43:00	BDL	1 day, 1:19:00	7 days, 15:35:00	BDL	06:05:00	BDL	BDL	BDL	00:52:00	00:07:00	00:49:00	00:16:00	ULdi1	EDJ1	buccal	-8 days, 19:29:00
49 days, 5:03:00	81 days, 20:19:00	1 day, 11:01:00	BDL	19:23:00	7 days, 12:36:00	BDL	07:21:00	BDL	BDL	BDL	00:53:00	00:05:00	00:49:00	00:18:00	ULdi1	EDJ1	buccal	-8 days, 19:44:00
49 days, 12:29:00	80 days, 16:16:00	1 day, 11:39:00	BDL	1 day, 4:11:00	7 days, 20:03:00	BDL	07:29:00	BDL	BDL	BDL	00:52:00	00:07:00	00:51:00	00:19:00	ULdi1	EDJ1	buccal	-8 days, 20:00:00
49 days, 20:36:00	79 days, 9:39:00	1 day, 10:01:00	BDL	1 day, 6:03:00	7 days, 11:37:00	BDL	06:08:00	BDL	BDL	BDL	00:51:00	00:08:00	00:48:00	00:16:00	ULdi1	EDJ1	buccal	-8 days, 19:35:00
50 days, 4:03:00	78 days, 22:00:00	1 day, 12:09:00	BDL	1 day, 5:18:00	7 days, 12:12:00	BDL	06:47:00	BDL	BDL	BDL	00:51:00	00:08:00	00:49:00	00:17:00	ULdi1	EDJ1	buccal	-8 days, 19:50:00
50 days, 11:30:00	81 days, 14:37:00	1 day, 17:58:00	BDL	1 day, 0:46:00	7 days, 23:10:00	BDL	06:35:00	BDL	00:09:00	BDL	00:53:00	00:07:00	00:52:00	00:17:00	ULdi1	EDJ1	buccal	-8 days, 20:06:00
50 days, 19:36:00	81 days, 3:35:00	1 day, 8:47:00	02:11:00	1 day, 5:42:00	7 days, 11:38:00	BDL	07:02:00	BDL	BDL	00:01:00	00:53:00	00:08:00	00:48:00	00:18:00	ULdi1	EDJ1	buccal	-8 days, 20:21:00
51 days, 3:03:00	81 days, 12:29:00	1 day, 9:05:00	BDL	1 day, 4:28:00	7 days, 13:34:00	BDL	07:30:00	BDL	BDL	BDL	00:53:00	00:08:00	00:49:00	00:19:00	ULdi1	EDJ1	buccal	-8 days, 20:37:00
51 days, 10:29:00	81 days, 13:34:00	1 day, 14:48:00	BDL	1 day, 9:46:00	7 days, 15:10:00	BDL	07:37:00	BDL	BDL	BDL	00:53:00	00:09:00	00:49:00	00:20:00	ULdi1	EDJ1	buccal	-8 days, 20:53:00
51 days, 18:36:00	78 days, 18:58:00	1 day, 10:25:00	BDL	1 day, 5:05:00	7 days, 19:14:00	BDL	06:58:00	BDL	00:08:00	BDL	00:51:00	00:08:00	00:50:00	00:18:00	ULdi1	EDJ1	buccal	-8 days, 20:29:00
52 days, 2:02:00	81 days, 7:37:00	1 day, 12:10:00	02:07:00	1 day, 6:50:00	7 days, 19:18:00	BDL	06:49:00	BDL	BDL	00:01:00	00:53:00	00:08:00	00:51:00	00:18:00	ULdi1	EDJ1	buccal	-8 days, 20:45:00
52 days, 9:29:00	79 days, 5:58:00	1 day, 13:35:00	BDL	1 day, 5:20:00	7 days, 15:28:00	BDL	06:50:00	BDL	00:18:00	BDL	00:51:00	00:08:00	00:49:00	00:18:00	ULdi1	EDJ1	buccal	-8 days, 21:01:00
52 days, 17:36:00	79 days, 9:08:00	1 day, 10:37:00	BDL	1 day, 7:38:00	7 days, 12:54:00	BDL	06:53:00	BDL	BDL	BDL	00:51:00	00:08:00	00:49:00	00:18:00	ULdi1	EDJ1	buccal	-8 days, 21:17:00
53 days, 1:02:00	83 days, 22:50:00	1 day, 10:20:00	BDL	1 day, 4:22:00	7 days, 14:35:00	BDL	06:01:00	BDL	BDL	BDL	00:54:00	00:08:00	00:49:00	00:16:00	ULdi1	EDJ1	buccal	-8 days, 21:33:00
53 days, 8:30:00	79 days, 7:30:00	1 day, 11:18:00	BDL	1 day, 2:24:00	7 days, 17:57:00	BDL	06:09:00	BDL	BDL	BDL	00:51:00	00:07:00	00:50:00	00:16:00	ULdi1	EDJ1	buccal	-8 days, 21:49:00
53 days, 16:36:00	78 days, 4:53:00	1 day, 7:18:00	BDL	22:20:00	7 days, 16:15:00	BDL	06:30:00	BDL	BDL	BDL	00:51:00	00:06:00	00:50:00	00:16:00	ULdi1	EDJ1	buccal	-8 days, 21:25:00
54 days, 0:03:00	82 days, 6:10:00	1 day, 11:07:00	BDL	1 day, 3:19:00	7 days, 17:17:00	BDL	06:22:00	BDL	BDL	BDL	00:53:00	00:07:00	00:50:00	00:16:00	ULdi1	EDJ1	buccal	-8 days, 21:42:00
54 days, 7:29:00	81 days, 19:44:00	1 day, 8:23:00	BDL	1 day, 4:24:00	7 days, 21:13:00	BDL	06:01:00	BDL	BDL	BDL	00:53:00	00:08:00	00:51:00	00:15:00	ULdi1	EDJ1	buccal	-8 days, 21:58:00
54 days, 15:36:00	81 days, 0:32:00	1 day, 10:31:00	BDL	1 day, 0:48:00	7 days, 12:40:00	BDL	06:00:00	BDL	00:17:00	BDL	00:53:00	00:07:00	00:49:00	00:15:00	ULdi1	EDJ1	buccal	-8 days, 22:15:00
54 days, 23:02:00	80 days, 14:37:00	1 day, 8:06:00	BDL	1 day, 3:19:00	7 days, 16:09:00	BDL	05:49:00	BDL	BDL	00:01:00	00:52:00	00:07:00	00:50:00	00:15:00	ULdi1	EDJ1	buccal	-8 days, 22:31:00
55 days, 6:29:00	78 days, 17:52:00	1 day, 11:34:00	BDL	1 day, 7:26:00	7 days, 19:34:00	BDL	06:11:00	BDL	BDL	BDL	00:51:00	00:08:00	00:51:00	00:15:00	ULdi1	EDJ1	buccal	-8 days, 22:48:00
55 days, 14:36:00	79 days, 17:25:00	1 day, 12:46:00	BDL	1 day, 7:04:00	7 days, 14:39:00	BDL	05:30:00	BDL	BDL	BDL	00:52:00	00:08:00	00:49:00	00:14:00	ULdi1	EDJ1	buccal	-8 days, 22:25:00
55 days, 22:03:00	80 days, 22:54:00	1 day, 9:06:00	BDL	1 day, 8:57:00	7 days, 16:37:00	BDL	06:12:00	BDL	BDL	BDL	00:53:00	00:09:00	00:50:00	00:15:00	ULdi1	EDJ1	buccal	-8 days, 22:42:00
56 days, 5:29:00	80 days, 17:49:00	1 day, 3:31:00	BDL	1 day, 3:30:00	7 days, 16:47:00	BDL	06:09:00	BDL	BDL	BDL	00:52:00	00:07:00	00:50:00	00:16:00	ULdi1	EDJ1	buccal	-8 days, 22:58:00
56 days, 13:36:00	78 days, 20:54:00	1 day, 11:19:00	BDL	1 day, 5:36:00	7 days, 18:22:00	BDL	07:34:00	BDL	BDL	BDL	00:51:00	00:08:00	00:50:00	00:19:00	ULdi1	EDJ1	buccal	-8 days, 23:15:00
56 days, 21:02:00	82 days, 16:23:00	1 day, 10:26:00	BDL	1 day, 15:58:00	7 days, 9:02:00	BDL	06:47:00	BDL	00:12:00	BDL	00:54:00	00:11:00	00:48:00	00:17:00	ULdi1	EDJ1	buccal	-8 days, 23:33:00
57 days, 4:29:00	81 days, 12:29:00	1 day, 2:03:00	02:13:00	1 day, 1:33:00	7 days, 15:33:00	BDL	06:36:00	BDL	BDL	BDL	00:53:00	00:07:00	00:49:00	00:16:00	ULdi1	EDJ1	buccal	-8 days, 23:50:00
57 days, 12:35:00	80 days, 12:49:00	1 day, 5:35:00	BDL	1 day, 4:03:00	7 days, 13:50:00	BDL	07:25:00	BDL	BDL	BDL	00:52:00	00:07:00	00:49:00	00:19:00	ULdi1	EDJ1	buccal	-8 days, 23:27:00
57 days, 20:02:00	82 days, 10:51:00	1 day, 7:46:00	BDL	1 day, 2:16:00	8 days, 3:29:00	BDL	06:48:00	BDL	BDL	BDL	00:53:00	00:07:00	00:53:00	00:18:00	ULdi1	EDJ1	buccal	-8 days, 23:44:00
58 days, 3:29:00	80 days, 9:33:00	1 day, 6:57:00	BDL	1 day, 6:04:00	7 days, 14:28:00	BDL	05:42:00	BDL	BDL	BDL	00:52:00	00:08:00	00:49:00	00:15:00	ULdi1	EDJ1	buccal	-7 days, 0:02:00
58 days, 11:36:00	80 days, 5:03:00	1 day, 15:01:00	BDL	1 day, 4:40:00	7 days, 13:48:00	BDL	06:17:00	BDL	00:09:00	BDL	00:52:00	00:08:00	00:49:00	00:17:00	ULdi1	EDJ1	buccal	-7 days, 0:19:00
58 days, 19:02:00	82 days, 0:00:00	1 day, 8:52:00	BDL	21:54:00	7 days, 21:05:00	BDL	06:30:00	BDL	BDL	BDL	00:53:00	00:06:00	00:51:00	00:17:00	ULdi1	EDJ1	buccal	-7 days, 0:36:00
59 days, 2:29:00	83 days, 8:36:00	1 day, 4:09:00	BDL	1 day, 6:24:00	7 days, 17:28:00	BDL	06:09:00	BDL	BDL	BDL	00:54:00	00:08:00	00:50:00	00:15:00	ULdi1	EDJ1	buccal	-7 days, 0:54:00
59 days, 10:35:00	81 days, 12:53:00	1 day, 8:29:00	BDL	22:34:00	7 days, 23:10:00	BDL	06:34:00	BDL	BDL	BDL	00:53:00	00:06:00	00:52:00	00:17:00	ULdi1	EDJ1	buccal	-7 days, 0:32:00
59 days, 18:02:00	85 days, 12:27:00	1 day, 10:05:00	BDL	1 day, 8:27:00	7 days, 19:31:00	BDL	06:01:00	BDL	BDL	BDL	00:55:00	00:09:00	00:51:00	00:16:00	ULdi1	EDJ1	buccal	-7 days, 0:50:00
60 days, 1:29:00	81 days, 11:10:00	1 day, 6:27:00	BDL	1 day, 0:21:00	7 days, 16:16:00	BDL	06:43:00	BDL	BDL	BDL	00:53:00	00:07:00	00:50:00	00:17:00	ULdi1	EDJ1	buccal	-7 days, 1:07:00
60 days, 9:35:00	82 days, 17:29:00	1 day, 8:59:00	BDL	1 day, 6:27:00	7 days, 18:09:00	BDL	06:31:00	BDL	BDL	BDL	00:54:00	00:08:00	00:50:00	00:16:00	ULdi1	EDJ1	buccal	-7 days, 1:25:00
60 days, 17:02:00	85 days, 7:22:00	1 day, 6:27:00	BDL	23:05:00	7 days, 17:50:00	BDL	06:17:00	BDL	BDL	BDL	00:55:00	00:06:00	00:50:00	00:16:00	ULdi1	EDJ1	buccal	-7 days, 1:43:00
61 days, 0:28:00	84 days, 3:38:00	1 day, 9:53:00	BDL	1 day, 7:29:00	7 days, 16:07:00	BDL	06:52:00	BDL	BDL	BDL	00:55:00	00:08:00	00:50:00	00:18:00	ULdi1	EDJ1	buccal	-7 days, 1:21:00
61 days, 8:36:00	82 days, 3:19:00	1 day, 5:20:00	BDL	1 day, 5:20:00	7 days, 18:17:00	BDL	08:04:00	BDL	BDL	BDL	00:53:00	00:08:00	00:50:00	00:21:00	ULdi1	EDJ1	buccal	-7 days, 1:39:00
61 days, 16:02:00	82 days, 13:24:00	1 day, 4:15:00	BDL	1 day, 9:00:00	7 days, 19:35:00	BDL	07:40:00	BDL	BDL	BDL	00:54:00	00:09:00	00:51:00	00:20:00	ULdi1	EDJ1	buccal	-7 days, 1:58:00
61 days, 23:29:00	81 days, 23:08:00	1 day, 3:33:00	02:01:00	1 day, 3:13:00	7 days, 21:07:00	BDL	07:13:00	BDL	BDL	BDL	00:53:00	00:07:00	00:51:00	00:18:00	ULdi1	EDJ1	buccal	-7 days, 2:16:00
62 days, 7:35:00	81 days, 23:32:00	1 day, 3:14:00	BDL	1 day, 7:19:00	7 days, 14:30:00	BDL	07:18:00	BDL	BDL	BDL	00:53:00	00:08:00	00:49:00	00:18:00	ULdi1	EDJ1	buccal	-7 days, 2:34:00
62 days, 15:02:00	79 days, 6:35:00	1 day, 5:05:00	BDL	1 day, 3:04:00	7 days, 19:21:00	BDL	06:31:00	BDL	BDL	BDL	00:51:00	00:07:00	00:50:00	00:17:00	ULdi1	EDJ1	buccal	-7 days, 2:53:00
62 days, 22:28:00	81 days, 0:34:00	1 day, 4:39:00	02:24:00	23:30:00	7 days, 21:12:00	BDL	07:25:00	BDL	BDL	BDL	00:53:00	00:06:00	00:51:00	00:20:00	ULdi1	EDJ1	buccal	-7 days, 2:31:00
63 days, 6:35:00	80 days, 16:02:00	1 day, 10:01:00	BDL	1 day, 9:24:00	7 days, 20:00:00	BDL	07:08:00	BDL	BDL	BDL	00:52:00	00:09:00	00:51:00	00:18:00	ULdi1	EDJ1	buccal	-7 days, 2:50:00
63 days, 14:02:00	81 days, 8:17:00	1 day, 5:24:00	BDL	1 day, 13:26:00	7 days, 20:39:00	BDL	06:51:00	BDL	BDL	BDL	00:53:00	00:10:00	00:51:00	00:18:00	ULdi1	EDJ1	buccal	-7 days, 3:08:00
63 days, 21:29:00	81 days, 18:49:00	1 day, 9:00:00	BDL	1 day, 7:11:00	7 days, 17:22:00	BDL	06:39:00	BDL	BDL	BDL	00:53:00	00:08:00	00:50:00	00:17:00	ULdi1	EDJ1	buccal	-7 days, 3:27:00
64 days, 5:35:00	80 days, 4:37:00	1 day, 8:05:00	BDL	20:06:00	7 days, 14:12:00	BDL	06:47:00	BDL	00:14:00	BDL	00:52:00	00:05:00	00:49:00	00:17:00	ULdi1	EDJ1	buccal	-7 days, 3:46:00
64 days, 13:02:00	79 days, 7:02:00	23:23:00	BDL	1 day, 7:33:00	7 days, 12:49:00	BDL	07:39:00	BDL	00:09:00	00:01:00	00:51:00	00:08:00	00:49:00	00:19:00	ULdi1	EDJ1	buccal	-7 days, 3:25:00
64 days, 20:28:00	81 days, 23:19:00	1 day, 5:38:00	BDL	1 day, 8:29:00	7 days, 21:51:00	BDL	07:04:00	BDL	BDL	BDL	00:53:00	00:09:00	00:51:00	00:18:00	ULdi1	EDJ1	buccal	-7 days, 3:44:00
65 days, 4:35:00	85 days, 0:28:00	1 day, 8:29:00	BDL	1 day, 6:10:00	7 days, 17:38:00	BDL	06:42:00	BDL	BDL	BDL	00:55:00	00:08:00	00:50:00	00:17:00	ULdi1	EDJ1	buccal	-7 days, 4:03:00
65 days, 12:01:00	84 days, 10:57:00	1 day, 6:16:00	BDL	1 day, 9:16:00	7 days, 17:32:00	BDL	06:46:00	BDL	BDL	BDL	00:55:00	00:09:00	00:50:00	00:17:00	ULdi1	EDJ1	buccal	-7 days, 4:22:00
65 days, 19:28:00	80 days, 10:23:00	1 day, 5:47:00	BDL	1 day, 2:38:00	7 days, 16:02:00	BDL	06:36:00	BDL	BDL	BDL	00:52:00	00:07:00	00:50:00	00:17:00	ULdi1	EDJ1	buccal	-7 days, 4:41:00
66 days, 3:35:00	79 days, 17:17:00	1 day, 5:32:00	BDL	1 day, 4:50:00	7 days, 13:01:00	BDL	06:35:00	BDL	BDL	BDL	00:52:00	00:08:00	00:49:00	00:16:00	ULdi1	EDJ1	buccal	-7 days, 5:00:00
66 days, 11:01:00	83 days, 3:22:00	1 day, 8:30:00	BDL	1 day, 4:10:00	7 days, 16:49:00	BDL	06:25:00	BDL	BDL	BDL	00:54:00	00:08:00	00:50:00	00:16:00	ULdi1	EDJ1	buccal	-7 days, 4:40:00
66 days, 18:29:00	82 days, 1:53:00	1 day, 5:37:00	BDL	1 day, 5:33:00	7 days, 15:01:00	BDL	07:23:00	BDL	00:12:00	BDL	00:53:00	00:08:00	00:49:00	00:18:00	ULdi1	EDJ1	buccal	-7 days, 5:00:00
67 days, 2:35:00	83 days, 0:04:00	1 day, 4:47:00	BDL	1 day, 4:23:00	7 days, 21:59:00	BDL	07:09:00	BDL	BDL	BDL	00:54:00	00:08:00	00:51:00	00:19:00	ULdi1	EDJ1	buccal	-7 days, 5:19:00
67 days, 10:02:00	82 days, 20:37:00	1 day, 6:20:00	BDL	1 day, 11:21:00	7 days, 18:15:00	BDL	07:35:00	BDL	BDL	BDL	00:54:00	00:10:00	00:50:00	00:20:00	ULdi1	EDJ1	buccal	-7 days, 5:39:00
67 days, 17:28:00	81 days, 7:28:00	1 day, 4:49:00	02:39:00	1 day, 1:39:00	7 days, 18:26:00	BDL	07:36:00	BDL	00:14:00	BDL	00:53:00	00:07:00	00:50:00	00:19:00	ULdi1	EDJ1	buccal	-7 days, 5:59:00
68 days, 1:35:00	80 days, 14:08:00	1 day, 10:54:00	BDL	1 day, 5:17:00	7 days, 15:01:00	BDL	06:21:00	BDL	BDL	BDL	00:52:00	00:08:00	00:49:00	00:17:00	ULdi1	EDJ1	buccal	-7 days, 5:39:00
68 days, 9:01:00	78 days, 14:28:00	1 day, 7:04:00	BDL	1 day, 5:26:00	7 days, 12:34:00	BDL	06:36:00	BDL	BDL	BDL	00:51:00	00:08:00	00:49:00	00:17:00	ULdi1	EDJ1	buccal	-7 days, 6:00:00
68 days, 16:28:00	81 days, 18:30:00	1 day, 13:21:00	BDL	1 day, 9:49:00	7 days, 14:14:00	BDL	06:49:00	BDL	BDL	BDL	00:53:00	00:09:00	00:49:00	00:18:00	ULdi1	EDJ1	buccal	-7 days, 6:20:00
69 days, 0:35:00	83 days, 12:56:00	1 day, 4:12:00	BDL	1 day, 5:12:00	7 days, 17:45:00	BDL	07:25:00	BDL	BDL	BDL	00:54:00	00:08:00	00:50:00	00:19:00	ULdi1	EDJ1	buccal	-7 days, 6:41:00
69 days, 8:02:00	81 days, 9:02:00	1 day, 7:24:00	BDL	23:17:00	7 days, 17:26:00	BDL	06:32:00	BDL	BDL	BDL	00:53:00	00:06:00	00:50:00	00:17:00	ULdi1	EDJ1	buccal	-7 days, 6:21:00
69 days, 15:28:00	83 days, 20:33:00	23:58:00	BDL	1 day, 1:32:00	7 days, 18:25:00	BDL	06:57:00	BDL	BDL	BDL	00:54:00	00:07:00	00:50:00	00:18:00	ULdi1	EDJ1	buccal	-7 days, 6:42:00
69 days, 23:35:00	83 days, 6:01:00	1 day, 7:02:00	BDL	1 day, 9:25:00	7 days, 20:07:00	BDL	06:35:00	BDL	BDL	BDL	00:54:00	00:09:00	00:51:00	00:16:00	ULdi1	EDJ1	buccal	-7 days, 7:03:00
70 days, 7:01:00	82 days, 1:35:00	1 day, 11:14:00	BDL	1 day, 1:59:00	7 days, 17:15:00	BDL	06:29:00	BDL	BDL	BDL	00:53:00	00:07:00	00:50:00	00:17:00	ULdi1	EDJ1	buccal	-7 days, 7:24:00
70 days, 14:28:00	82 days, 7:48:00	1 day, 7:26:00	BDL	1 day, 5:36:00	7 days, 23:29:00	BDL	06:07:00	BDL	BDL	BDL	00:53:00	00:08:00	00:52:00	00:16:00	ULdi1	EDJ1	buccal	-7 days, 7:45:00
70 days, 22:34:00	84 days, 2:10:00	1 day, 8:24:00	BDL	1 day, 5:55:00	7 days, 15:29:00	BDL	07:19:00	BDL	BDL	BDL	00:55:00	00:08:00	00:49:00	00:18:00	ULdi1	EDJ1	buccal	-7 days, 7:27:00
71 days, 6:01:00	82 days, 8:47:00	1 day, 13:20:00	BDL	1 day, 5:23:00	7 days, 16:14:00	BDL	07:04:00	BDL	BDL	BDL	00:53:00	00:08:00	00:50:00	00:18:00	ULdi1	EDJ1	buccal	-7 days, 7:48:00
71 days, 13:28:00	79 days, 5:06:00	1 day, 8:14:00	BDL	1 day, 15:16:00	7 days, 18:17:00	BDL	07:01:00	BDL	BDL	BDL	00:51:00	00:10:00	00:50:00	00:18:00	ULdi1	EDJ1	buccal	-7 days, 8:10:00
71 days, 21:35:00	82 days, 5:14:00	1 day, 10:20:00	BDL	1 day, 5:20:00	7 days, 18:58:00	BDL	07:26:00	BDL	BDL	00:01:00	00:53:00	00:08:00	00:50:00	00:19:00	ULdi1	EDJ1	buccal	-7 days, 8:32:00
72 days, 5:01:00	80 days, 2:49:00	1 day, 8:37:00	BDL	22:15:00	7 days, 16:29:00	BDL	06:32:00	BDL	BDL	BDL	00:52:00	00:06:00	00:50:00	00:17:00	ULdi1	EDJ1	buccal	-7 days, 8:53:00
72 days, 12:28:00	79 days, 19:17:00	1 day, 2:28:00	BDL	20:22:00	7 days, 15:46:00	BDL	07:34:00	BDL	BDL	BDL	00:52:00	00:05:00	00:50:00	00:20:00	ULdi1	EDJ1	buccal	-7 days, 8:35:00
72 days, 20:34:00	80 days, 20:21:00	1 day, 10:38:00	BDL	23:54:00	7 days, 16:00:00	BDL	06:52:00	BDL	BDL	BDL	00:52:00	00:06:00	00:50:00	00:18:00	ULdi1	EDJ1	buccal	-7 days, 8:57:00
73 days, 4:01:00	79 days, 0:20:00	1 day, 2:12:00	BDL	23:52:00	7 days, 14:20:00	BDL	06:18:00	BDL	00:08:00	BDL	00:51:00	00:06:00	00:49:00	00:17:00	ULdi1	EDJ1	buccal	-7 days, 9:20:00
73 days, 11:28:00	76 days, 2:08:00	1 day, 7:04:00	BDL	1 day, 4:13:00	7 days, 13:18:00	BDL	07:21:00	BDL	BDL	BDL	00:49:00	00:08:00	00:49:00	00:19:00	ULdi1	EDJ1	buccal	-7 days, 9:42:00
73 days, 19:34:00	82 days, 11:15:00	1 day, 1:39:00	BDL	1 day, 6:20:00	7 days, 15:07:00	BDL	07:10:00	BDL	BDL	BDL	00:53:00	00:08:00	00:49:00	00:18:00	ULdi1	EDJ1	buccal	-7 days, 9:24:00
74 days, 3:01:00	81 days, 13:18:00	1 day, 11:54:00	BDL	1 day, 4:17:00	7 days, 13:49:00	BDL	07:16:00	BDL	BDL	BDL	00:53:00	00:08:00	00:49:00	00:18:00	ULdi1	EDJ1	buccal	-7 days, 9:47:00
74 days, 10:27:00	80 days, 7:38:00	1 day, 9:36:00	BDL	1 day, 4:35:00	7 days, 17:19:00	BDL	06:14:00	BDL	BDL	BDL	00:52:00	00:08:00	00:50:00	00:17:00	ULdi1	EDJ1	buccal	-7 days, 10:10:00
74 days, 18:35:00	75 days, 18:00:00	1 day, 9:32:00	BDL	1 day, 0:05:00	7 days, 13:09:00	BDL	06:50:00	BDL	BDL	BDL	00:49:00	00:07:00	00:49:00	00:18:00	ULdi1	EDJ1	buccal	-7 days, 10:32:00
75 days, 2:01:00	79 days, 6:23:00	1 day, 6:12:00	BDL	1 day, 5:55:00	7 days, 22:21:00	BDL	07:06:00	BDL	00:08:00	BDL	00:51:00	00:08:00	00:51:00	00:19:00	ULdi1	EDJ1	buccal	-7 days, 10:55:00
75 days, 9:28:00	81 days, 0:00:00	1 day, 8:55:00	02:12:00	20:34:00	7 days, 16:03:00	BDL	07:03:00	BDL	BDL	BDL	00:53:00	00:05:00	00:50:00	00:19:00	ULdi1	EDJ1	buccal	-7 days, 10:38:00
75 days, 17:34:00	84 days, 3:40:00	1 day, 5:15:00	BDL	1 day, 10:03:00	7 days, 20:43:00	BDL	06:41:00	BDL	BDL	BDL	00:55:00	00:09:00	00:51:00	00:17:00	ULdi1	EDJ1	buccal	-7 days, 11:01:00
76 days, 1:01:00	81 days, 20:05:00	1 day, 5:00:00	BDL	1 day, 5:32:00	7 days, 19:47:00	BDL	06:02:00	00:06:00	BDL	BDL	00:53:00	00:08:00	00:51:00	00:16:00	ULdi1	EDJ1	buccal	-7 days, 11:25:00
76 days, 8:27:00	80 days, 4:40:00	1 day, 9:34:00	BDL	21:09:00	7 days, 22:04:00	BDL	06:21:00	BDL	BDL	BDL	00:52:00	00:06:00	00:51:00	00:17:00	ULdi1	EDJ1	buccal	-7 days, 11:48:00
76 days, 16:34:00	80 days, 11:53:00	23:03:00	BDL	1 day, 1:00:00	7 days, 21:02:00	BDL	07:03:00	BDL	00:08:00	BDL	00:52:00	00:07:00	00:51:00	00:19:00	ULdi1	EDJ1	buccal	-7 days, 11:31:00
77 days, 0:01:00	79 days, 21:41:00	1 day, 2:55:00	BDL	1 day, 8:16:00	7 days, 17:28:00	BDL	07:02:00	BDL	BDL	BDL	00:52:00	00:09:00	00:50:00	00:19:00	ULdi1	EDJ1	buccal	-7 days, 11:55:00
77 days, 7:28:00	79 days, 15:31:00	1 day, 2:23:00	BDL	1 day, 4:15:00	7 days, 17:19:00	BDL	07:17:00	BDL	BDL	BDL	00:52:00	00:08:00	00:50:00	00:18:00	ULdi1	EDJ1	buccal	-7 days, 12:19:00
77 days, 15:34:00	82 days, 4:41:00	1 day, 7:19:00	BDL	22:24:00	7 days, 15:39:00	BDL	06:29:00	BDL	00:11:00	BDL	00:53:00	00:06:00	00:50:00	00:16:00	ULdi1	EDJ1	buccal	-7 days, 12:42:00
77 days, 23:01:00	79 days, 22:25:00	1 day, 9:50:00	BDL	1 day, 8:06:00	7 days, 21:12:00	BDL	07:03:00	BDL	BDL	BDL	00:52:00	00:09:00	00:51:00	00:18:00	ULdi1	EDJ1	buccal	-7 days, 12:26:00
78 days, 6:27:00	82 days, 14:40:00	1 day, 4:20:00	BDL	1 day, 0:46:00	7 days, 21:55:00	BDL	06:18:00	BDL	BDL	BDL	00:54:00	00:07:00	00:51:00	00:17:00	ULdi1	EDJ1	buccal	-7 days, 12:50:00
78 days, 14:34:00	81 days, 20:00:00	1 day, 4:22:00	BDL	1 day, 4:32:00	7 days, 15:27:00	BDL	06:43:00	BDL	BDL	BDL	00:53:00	00:08:00	00:50:00	00:17:00	ULdi1	EDJ1	buccal	-7 days, 13:14:00
78 days, 22:00:00	81 days, 14:35:00	1 day, 2:58:00	BDL	1 day, 9:46:00	7 days, 19:24:00	BDL	06:13:00	BDL	BDL	BDL	00:53:00	00:09:00	00:50:00	00:17:00	ULdi1	EDJ1	buccal	-7 days, 13:38:00
79 days, 5:27:00	79 days, 20:57:00	1 day, 9:59:00	BDL	1 day, 6:40:00	7 days, 20:13:00	BDL	06:25:00	BDL	BDL	BDL	00:52:00	00:08:00	00:51:00	00:17:00	ULdi1	EDJ1	buccal	-7 days, 13:22:00
79 days, 13:34:00	78 days, 16:17:00	22:07:00	BDL	1 day, 3:23:00	7 days, 20:13:00	BDL	06:18:00	BDL	BDL	00:01:00	00:51:00	00:07:00	00:51:00	00:17:00	ULdi1	EDJ1	buccal	-7 days, 13:46:00
79 days, 21:00:00	80 days, 3:35:00	23:47:00	BDL	1 day, 4:19:00	8 days, 3:32:00	BDL	06:02:00	BDL	BDL	BDL	00:52:00	00:08:00	00:53:00	00:16:00	ULdi1	EDJ1	buccal	-7 days, 14:11:00
80 days, 4:28:00	78 days, 18:38:00	1 day, 4:48:00	BDL	1 day, 5:49:00	7 days, 17:25:00	BDL	06:18:00	BDL	BDL	BDL	00:51:00	00:08:00	00:50:00	00:16:00	ULdi1	EDJ1	buccal	-7 days, 14:35:00
80 days, 12:34:00	79 days, 12:27:00	1 day, 5:03:00	BDL	23:01:00	7 days, 20:20:00	BDL	06:05:00	BDL	BDL	BDL	00:52:00	00:06:00	00:51:00	00:15:00	ULdi1	EDJ1	buccal	-7 days, 15:00:00
80 days, 20:01:00	83 days, 7:32:00	1 day, 8:27:00	BDL	1 day, 2:29:00	7 days, 22:05:00	BDL	06:38:00	BDL	BDL	BDL	00:54:00	00:07:00	00:51:00	00:16:00	ULdi1	EDJ1	buccal	-7 days, 14:44:00
81 days, 3:27:00	78 days, 20:53:00	1 day, 3:38:00	BDL	1 day, 8:18:00	7 days, 22:21:00	BDL	05:42:00	BDL	BDL	BDL	00:51:00	00:09:00	00:51:00	00:15:00	ULdi1	EDJ1	buccal	-7 days, 15:09:00
81 days, 11:34:00	78 days, 18:02:00	1 day, 7:11:00	BDL	1 day, 8:03:00	7 days, 16:43:00	BDL	06:00:00	BDL	BDL	BDL	00:51:00	00:09:00	00:50:00	00:15:00	ULdi1	EDJ1	buccal	-7 days, 15:34:00
81 days, 19:00:00	81 days, 20:47:00	1 day, 6:05:00	BDL	1 day, 15:24:00	7 days, 20:54:00	BDL	06:37:00	BDL	BDL	BDL	00:53:00	00:10:00	00:51:00	00:17:00	ULdi1	EDJ1	buccal	-7 days, 15:59:00
82 days, 2:27:00	81 days, 6:35:00	1 day, 8:40:00	BDL	1 day, 6:04:00	7 days, 20:11:00	BDL	05:58:00	BDL	BDL	BDL	00:53:00	00:08:00	00:51:00	00:15:00	ULdi1	EDJ1	buccal	-7 days, 15:44:00
82 days, 10:34:00	84 days, 5:39:00	1 day, 5:35:00	BDL	1 day, 4:01:00	7 days, 18:50:00	BDL	06:09:00	BDL	BDL	BDL	00:55:00	00:07:00	00:50:00	00:16:00	ULdi1	EDJ1	buccal	-7 days, 16:09:00
82 days, 18:01:00	82 days, 11:30:00	1 day, 4:26:00	BDL	1 day, 7:25:00	7 days, 20:10:00	BDL	07:21:00	BDL	BDL	BDL	00:53:00	00:08:00	00:51:00	00:18:00	ULdi1	EDJ1	buccal	-7 days, 16:34:00
83 days, 1:27:00	80 days, 21:04:00	1 day, 4:11:00	BDL	1 day, 0:08:00	7 days, 20:02:00	BDL	06:33:00	BDL	BDL	BDL	00:52:00	00:06:00	00:51:00	00:17:00	ULdi1	EDJ1	buccal	-7 days, 16:59:00
83 days, 9:34:00	76 days, 21:25:00	23:49:00	BDL	23:00:00	7 days, 20:02:00	BDL	06:27:00	BDL	BDL	00:01:00	00:50:00	00:06:00	00:51:00	00:16:00	ULdi1	EDJ1	buccal	-7 days, 16:44:00
83 days, 17:00:00	80 days, 17:10:00	1 day, 0:03:00	BDL	1 day, 8:51:00	7 days, 23:31:00	BDL	07:35:00	BDL	BDL	BDL	00:52:00	00:09:00	00:52:00	00:19:00	ULdi1	EDJ1	buccal	-7 days, 17:09:00
84 days, 0:27:00	80 days, 17:15:00	1 day, 5:37:00	BDL	1 day, 3:46:00	7 days, 22:15:00	BDL	06:27:00	BDL	BDL	BDL	00:52:00	00:07:00	00:51:00	00:16:00	ULdi1	EDJ1	buccal	-7 days, 17:35:00
84 days, 8:33:00	78 days, 7:14:00	23:08:00	BDL	20:18:00	7 days, 21:25:00	BDL	06:23:00	BDL	BDL	BDL	00:51:00	00:05:00	00:51:00	00:16:00	ULdi1	EDJ1	buccal	-7 days, 18:00:00
84 days, 16:00:00	76 days, 13:14:00	1 day, 5:23:00	02:25:00	1 day, 8:39:00	7 days, 21:22:00	BDL	07:20:00	BDL	BDL	BDL	00:50:00	00:09:00	00:51:00	00:18:00	ULdi1	EDJ1	buccal	-7 days, 17:46:00
84 days, 23:27:00	76 days, 15:58:00	1 day, 4:37:00	BDL	1 day, 7:32:00	7 days, 17:39:00	BDL	06:23:00	BDL	BDL	BDL	00:50:00	00:08:00	00:50:00	00:17:00	ULdi1	EDJ1	buccal	-7 days, 18:11:00
85 days, 7:34:00	79 days, 8:35:00	1 day, 1:52:00	BDL	1 day, 2:06:00	7 days, 18:39:00	BDL	06:59:00	BDL	BDL	BDL	00:51:00	00:07:00	00:50:00	00:18:00	ULdi1	EDJ1	buccal	-7 days, 18:37:00
85 days, 15:00:00	79 days, 1:28:00	1 day, 3:39:00	BDL	1 day, 0:02:00	7 days, 21:20:00	BDL	06:47:00	BDL	BDL	BDL	00:51:00	00:06:00	00:51:00	00:17:00	ULdi1	EDJ1	buccal	-7 days, 18:23:00
85 days, 22:27:00	79 days, 2:10:00	23:50:00	BDL	23:35:00	7 days, 22:15:00	BDL	06:30:00	BDL	BDL	BDL	00:51:00	00:06:00	00:51:00	00:17:00	ULdi1	EDJ1	buccal	-7 days, 18:48:00
86 days, 6:33:00	78 days, 11:38:00	1 day, 2:18:00	BDL	1 day, 6:42:00	8 days, 3:16:00	BDL	06:40:00	BDL	BDL	BDL	00:51:00	00:08:00	00:53:00	00:17:00	ULdi1	EDJ1	buccal	-7 days, 19:14:00
86 days, 14:00:00	78 days, 22:29:00	1 day, 2:21:00	BDL	22:18:00	7 days, 22:25:00	BDL	06:24:00	BDL	BDL	BDL	00:51:00	00:06:00	00:51:00	00:17:00	ULdi1	EDJ1	buccal	-7 days, 19:40:00
86 days, 21:27:00	78 days, 9:48:00	22:12:00	BDL	1 day, 8:30:00	7 days, 16:59:00	BDL	06:08:00	BDL	BDL	BDL	00:51:00	00:09:00	00:50:00	00:15:00	ULdi1	EDJ1	buccal	-7 days, 19:26:00
87 days, 5:33:00	78 days, 11:26:00	21:00:00	BDL	1 day, 13:10:00	7 days, 22:39:00	BDL	06:29:00	BDL	BDL	BDL	00:51:00	00:10:00	00:51:00	00:17:00	ULdi1	EDJ1	buccal	-7 days, 19:52:00
87 days, 13:00:00	79 days, 9:26:00	1 day, 1:17:00	BDL	1 day, 4:31:00	8 days, 1:17:00	BDL	06:36:00	BDL	BDL	00:02:00	00:51:00	00:08:00	00:52:00	00:17:00	ULdi1	EDJ1	buccal	-7 days, 20:18:00
87 days, 20:26:00	81 days, 16:29:00	22:39:00	BDL	1 day, 8:22:00	7 days, 23:07:00	BDL	06:42:00	BDL	BDL	BDL	00:53:00	00:09:00	00:52:00	00:17:00	ULdi1	EDJ1	buccal	-7 days, 20:44:00
88 days, 4:34:00	79 days, 13:14:00	22:30:00	BDL	1 day, 13:01:00	8 days, 2:19:00	BDL	06:20:00	BDL	BDL	BDL	00:52:00	00:10:00	00:52:00	00:16:00	ULdi1	EDJ1	buccal	-7 days, 20:30:00
88 days, 12:00:00	82 days, 23:09:00	1 day, 6:27:00	BDL	1 day, 13:28:00	8 days, 0:26:00	BDL	06:29:00	BDL	BDL	BDL	00:54:00	00:10:00	00:52:00	00:17:00	ULdi1	EDJ1	buccal	-7 days, 20:57:00
88 days, 19:27:00	78 days, 19:05:00	1 day, 2:19:00	BDL	1 day, 6:25:00	7 days, 17:34:00	BDL	06:18:00	BDL	BDL	00:01:00	00:51:00	00:08:00	00:50:00	00:17:00	ULdi1	EDJ1	buccal	-7 days, 21:23:00
89 days, 3:33:00	78 days, 20:00:00	22:14:00	BDL	1 day, 5:04:00	7 days, 19:39:00	BDL	06:11:00	00:07:00	BDL	BDL	00:51:00	00:08:00	00:51:00	00:15:00	ULdi1	EDJ1	buccal	-7 days, 21:49:00
89 days, 11:00:00	79 days, 14:47:00	1 day, 2:10:00	BDL	21:08:00	7 days, 23:43:00	BDL	07:06:00	BDL	BDL	BDL	00:52:00	00:06:00	00:52:00	00:18:00	ULdi1	EDJ1	buccal	-7 days, 21:35:00
89 days, 18:26:00	76 days, 13:22:00	1 day, 1:53:00	BDL	1 day, 4:53:00	7 days, 21:19:00	BDL	06:09:00	BDL	BDL	BDL	00:50:00	00:08:00	00:51:00	00:15:00	ULdi1	EDJ1	buccal	-7 days, 22:02:00
90 days, 2:33:00	75 days, 14:55:00	1 day, 4:32:00	BDL	1 day, 6:23:00	7 days, 23:33:00	BDL	06:02:00	BDL	BDL	BDL	00:49:00	00:08:00	00:52:00	00:16:00	ULdi1	EDJ1	buccal	-7 days, 22:28:00
90 days, 10:00:00	78 days, 12:05:00	1 day, 3:03:00	BDL	1 day, 5:32:00	8 days, 4:50:00	BDL	07:08:00	BDL	BDL	BDL	00:51:00	00:08:00	00:53:00	00:19:00	ULdi1	EDJ1	buccal	-7 days, 22:55:00
90 days, 17:27:00	81 days, 7:15:00	1 day, 5:31:00	BDL	1 day, 8:56:00	8 days, 2:18:00	BDL	06:37:00	BDL	BDL	BDL	00:53:00	00:09:00	00:52:00	00:16:00	ULdi1	EDJ1	buccal	-7 days, 22:41:00
91 days, 1:33:00	82 days, 6:31:00	1 day, 1:30:00	BDL	1 day, 0:35:00	8 days, 2:31:00	BDL	06:33:00	BDL	BDL	BDL	00:53:00	00:06:00	00:52:00	00:16:00	ULdi1	EDJ1	buccal	-7 days, 23:08:00
91 days, 9:00:00	77 days, 23:08:00	1 day, 1:15:00	BDL	1 day, 0:19:00	8 days, 6:25:00	BDL	07:22:00	BDL	BDL	BDL	00:51:00	00:07:00	00:53:00	00:20:00	ULdi1	EDJ1	buccal	-7 days, 23:34:00
91 days, 16:26:00	78 days, 13:23:00	1 day, 0:29:00	BDL	1 day, 1:28:00	8 days, 0:33:00	BDL	05:58:00	BDL	BDL	BDL	00:51:00	00:07:00	00:52:00	00:15:00	ULdi1	EDJ1	buccal	-7 days, 23:21:00
92 days, 0:33:00	77 days, 7:42:00	21:06:00	BDL	1 day, 5:25:00	8 days, 2:01:00	BDL	07:34:00	BDL	00:08:00	BDL	00:50:00	00:08:00	00:52:00	00:19:00	ULdi1	EDJ1	buccal	-7 days, 23:47:00
92 days, 7:59:00	79 days, 14:32:00	17:35:00	BDL	1 day, 4:52:00	8 days, 4:03:00	BDL	07:05:00	BDL	BDL	BDL	00:52:00	00:08:00	00:53:00	00:18:00	ULdi1	EDJ1	buccal	-6 days, 0:14:00
92 days, 15:26:00	77 days, 3:11:00	1 day, 1:13:00	BDL	1 day, 3:35:00	8 days, 5:00:00	BDL	06:38:00	BDL	BDL	BDL	00:50:00	00:07:00	00:53:00	00:17:00	ULdi1	EDJ1	buccal	-6 days, 0:41:00
92 days, 23:33:00	76 days, 5:00:00	19:17:00	BDL	1 day, 2:17:00	8 days, 2:34:00	BDL	07:23:00	BDL	BDL	BDL	00:49:00	00:07:00	00:53:00	00:18:00	ULdi1	EDJ1	buccal	-6 days, 0:28:00
93 days, 6:59:00	75 days, 22:48:00	20:05:00	BDL	23:26:00	8 days, 3:20:00	BDL	06:30:00	BDL	BDL	BDL	00:49:00	00:06:00	00:53:00	00:17:00	ULdi1	EDJ1	buccal	-6 days, 0:54:00
93 days, 14:27:00	80 days, 0:10:00	23:26:00	BDL	1 day, 9:30:00	8 days, 0:03:00	BDL	06:11:00	BDL	BDL	BDL	00:52:00	00:09:00	00:52:00	00:17:00	ULdi1	EDJ1	buccal	-6 days, 1:21:00
93 days, 22:33:00	78 days, 9:51:00	1 day, 2:05:00	BDL	1 day, 4:31:00	8 days, 1:12:00	BDL	06:39:00	BDL	00:08:00	BDL	00:51:00	00:08:00	00:52:00	00:17:00	ULdi1	EDJ1	buccal	-6 days, 1:48:00
94 days, 6:00:00	75 days, 12:24:00	1 day, 0:40:00	BDL	1 day, 8:03:00	8 days, 5:51:00	BDL	06:05:00	BDL	BDL	BDL	00:49:00	00:09:00	00:53:00	00:16:00	ULdi1	EDJ1	buccal	-6 days, 1:35:00
94 days, 13:26:00	78 days, 2:08:00	1 day, 0:03:00	BDL	1 day, 6:28:00	7 days, 23:05:00	BDL	06:17:00	BDL	BDL	BDL	00:51:00	00:08:00	00:52:00	00:16:00	ULdi1	EDJ1	buccal	-6 days, 2:02:00
94 days, 21:33:00	73 days, 22:31:00	23:32:00	BDL	1 day, 7:20:00	8 days, 1:28:00	BDL	06:27:00	BDL	BDL	BDL	00:48:00	00:08:00	00:52:00	00:17:00	ULdi1	EDJ1	buccal	-6 days, 2:29:00
95 days, 4:59:00	75 days, 23:30:00	1 day, 5:19:00	BDL	20:50:00	8 days, 4:38:00	BDL	06:48:00	BDL	BDL	BDL	00:49:00	00:06:00	00:53:00	00:18:00	ULdi1	EDJ1	buccal	-6 days, 2:55:00
95 days, 12:26:00	77 days, 5:39:00	1 day, 1:50:00	BDL	23:27:00	8 days, 4:18:00	BDL	07:27:00	BDL	BDL	BDL	00:50:00	00:06:00	00:53:00	00:19:00	ULdi1	EDJ1	buccal	-6 days, 2:42:00
95 days, 20:33:00	76 days, 2:29:00	1 day, 0:52:00	BDL	22:08:00	8 days, 9:08:00	BDL	07:12:00	BDL	BDL	BDL	00:49:00	00:06:00	00:54:00	00:19:00	ULdi1	EDJ1	buccal	-6 days, 3:09:00
96 days, 4:00:00	76 days, 19:40:00	1 day, 4:34:00	BDL	1 day, 1:39:00	8 days, 6:59:00	BDL	08:10:00	BDL	BDL	BDL	00:50:00	00:07:00	00:54:00	00:22:00	ULdi1	EDJ1	buccal	-6 days, 3:36:00
96 days, 11:26:00	78 days, 7:30:00	1 day, 3:03:00	BDL	1 day, 5:05:00	8 days, 7:28:00	BDL	07:58:00	BDL	00:08:00	00:01:00	00:51:00	00:08:00	00:54:00	00:20:00	ULdi1	EDJ1	buccal	-6 days, 3:23:00
96 days, 19:33:00	78 days, 13:14:00	1 day, 5:16:00	BDL	1 day, 11:51:00	8 days, 13:59:00	BDL	09:37:00	BDL	BDL	BDL	00:51:00	00:10:00	00:56:00	00:24:00	ULdi1	EDJ1	buccal	-6 days, 3:50:00
97 days, 2:59:00	79 days, 10:59:00	23:38:00	02:01:00	23:31:00	8 days, 18:20:00	BDL	09:08:00	BDL	BDL	00:01:00	00:52:00	00:06:00	00:57:00	00:23:00	ULdi1	EDJ1	buccal	-6 days, 4:17:00
97 days, 10:26:00	81 days, 1:03:00	1 day, 1:07:00	BDL	1 day, 10:28:00	8 days, 12:12:00	BDL	09:05:00	BDL	BDL	00:01:00	00:53:00	00:09:00	00:55:00	00:23:00	ULdi1	EDJ1	buccal	-6 days, 4:45:00
97 days, 18:32:00	76 days, 0:53:00	1 day, 1:18:00	BDL	1 day, 6:00:00	8 days, 12:36:00	BDL	08:34:00	BDL	00:08:00	00:03:00	00:49:00	00:08:00	00:55:00	00:23:00	ULdi1	EDJ1	buccal	-6 days, 4:32:00
98 days, 1:59:00	76 days, 1:27:00	1 day, 1:11:00	BDL	1 day, 1:34:00	8 days, 2:36:00	BDL	09:23:00	BDL	BDL	00:01:00	00:49:00	00:07:00	00:53:00	00:24:00	ULdi1	EDJ1	buccal	-6 days, 4:59:00
98 days, 9:26:00	78 days, 4:42:00	21:54:00	BDL	1 day, 8:11:00	8 days, 11:23:00	BDL	09:21:00	BDL	BDL	00:01:00	00:51:00	00:09:00	00:55:00	00:24:00	ULdi1	EDJ1	buccal	-6 days, 5:27:00
98 days, 17:33:00	79 days, 8:02:00	1 day, 2:27:00	02:11:00	21:45:00	8 days, 10:01:00	BDL	09:37:00	BDL	BDL	00:02:00	00:51:00	00:06:00	00:54:00	00:24:00	ULdi1	EDJ1	buccal	-6 days, 5:55:00
99 days, 0:59:00	82 days, 2:03:00	1 day, 0:25:00	BDL	1 day, 15:35:00	8 days, 10:15:00	BDL	09:05:00	BDL	BDL	00:01:00	00:53:00	00:11:00	00:55:00	00:24:00	ULdi1	EDJ1	buccal	-6 days, 5:42:00
99 days, 8:26:00	75 days, 12:20:00	15:30:00	BDL	19:35:00	8 days, 5:26:00	BDL	08:07:00	BDL	00:09:00	BDL	00:49:00	00:05:00	00:53:00	00:22:00	ULdi1	EDJ1	buccal	-6 days, 6:10:00
99 days, 16:32:00	80 days, 23:06:00	22:23:00	BDL	1 day, 6:16:00	8 days, 13:38:00	BDL	08:20:00	BDL	BDL	BDL	00:53:00	00:08:00	00:55:00	00:22:00	ULdi1	EDJ1	buccal	-6 days, 6:38:00
99 days, 23:59:00	79 days, 18:09:00	21:06:00	BDL	1 day, 14:14:00	8 days, 12:09:00	BDL	08:13:00	BDL	BDL	BDL	00:52:00	00:10:00	00:55:00	00:21:00	ULdi1	EDJ1	buccal	-6 days, 6:26:00
100 days, 7:26:00	77 days, 8:21:00	1 day, 3:06:00	BDL	1 day, 5:02:00	8 days, 9:52:00	BDL	08:23:00	BDL	BDL	BDL	00:50:00	00:08:00	00:54:00	00:22:00	ULdi1	EDJ1	buccal	-6 days, 6:54:00
100 days, 15:32:00	76 days, 7:37:00	18:33:00	BDL	1 day, 0:26:00	8 days, 5:41:00	BDL	08:55:00	BDL	BDL	BDL	00:49:00	00:06:00	00:53:00	00:23:00	ULdi1	EDJ1	buccal	-6 days, 7:22:00
100 days, 22:59:00	80 days, 2:05:00	23:36:00	BDL	1 day, 6:02:00	8 days, 13:37:00	BDL	07:36:00	BDL	BDL	00:01:00	00:52:00	00:08:00	00:55:00	00:20:00	ULdi1	EDJ1	buccal	-6 days, 7:51:00
101 days, 6:25:00	77 days, 7:17:00	20:59:00	BDL	1 day, 12:09:00	8 days, 12:10:00	BDL	08:53:00	BDL	BDL	BDL	00:50:00	00:10:00	00:55:00	00:23:00	ULdi1	EDJ1	buccal	-6 days, 7:39:00
101 days, 14:33:00	77 days, 14:17:00	18:14:00	BDL	1 day, 9:03:00	8 days, 6:39:00	BDL	08:58:00	BDL	BDL	BDL	00:50:00	00:09:00	00:54:00	00:23:00	ULdi1	EDJ1	buccal	-6 days, 8:07:00
101 days, 21:59:00	75 days, 18:20:00	1 day, 3:20:00	BDL	1 day, 10:13:00	8 days, 10:04:00	BDL	09:05:00	BDL	BDL	BDL	00:49:00	00:09:00	00:54:00	00:24:00	ULdi1	EDJ1	buccal	-6 days, 8:36:00
102 days, 5:26:00	76 days, 23:26:00	21:25:00	BDL	1 day, 1:01:00	8 days, 13:05:00	BDL	08:37:00	BDL	BDL	00:01:00	00:50:00	00:07:00	00:55:00	00:23:00	ULdi1	EDJ1	buccal	-6 days, 8:24:00
102 days, 13:32:00	77 days, 18:44:00	22:10:00	BDL	22:26:00	8 days, 9:44:00	BDL	09:06:00	BDL	BDL	BDL	00:50:00	00:06:00	00:54:00	00:23:00	ULdi1	EDJ1	buccal	-6 days, 8:53:00
102 days, 20:59:00	78 days, 11:55:00	1 day, 5:58:00	BDL	1 day, 5:35:00	8 days, 15:04:00	BDL	09:10:00	BDL	BDL	00:01:00	00:51:00	00:08:00	00:56:00	00:25:00	ULdi1	EDJ1	buccal	-6 days, 9:22:00
103 days, 4:25:00	73 days, 10:20:00	17:15:00	BDL	1 day, 7:12:00	8 days, 14:57:00	BDL	09:38:00	BDL	BDL	BDL	00:48:00	00:08:00	00:56:00	00:25:00	ULdi1	EDJ1	buccal	-6 days, 9:50:00
103 days, 12:32:00	76 days, 0:55:00	22:40:00	BDL	1 day, 8:24:00	8 days, 7:21:00	BDL	09:45:00	BDL	BDL	00:02:00	00:49:00	00:09:00	00:54:00	00:26:00	ULdi1	EDJ1	buccal	-6 days, 9:39:00
103 days, 19:59:00	78 days, 3:27:00	1 day, 0:39:00	BDL	1 day, 9:25:00	8 days, 19:37:00	BDL	09:37:00	BDL	BDL	00:04:00	00:51:00	00:09:00	00:57:00	00:25:00	ULdi1	EDJ1	buccal	-6 days, 10:08:00
104 days, 3:26:00	76 days, 2:22:00	1 day, 1:30:00	BDL	20:20:00	8 days, 13:16:00	BDL	09:25:00	BDL	BDL	00:05:00	00:49:00	00:05:00	00:55:00	00:25:00	ULdi1	EDJ1	buccal	-6 days, 10:37:00
104 days, 11:32:00	76 days, 16:01:00	23:57:00	BDL	1 day, 0:05:00	8 days, 13:22:00	BDL	09:50:00	BDL	BDL	00:02:00	00:50:00	00:06:00	00:55:00	00:26:00	ULdi1	EDJ1	buccal	-6 days, 10:26:00
104 days, 18:59:00	74 days, 21:17:00	22:03:00	BDL	1 day, 6:10:00	8 days, 12:47:00	BDL	10:36:00	BDL	00:10:00	00:03:00	00:49:00	00:08:00	00:55:00	00:27:00	ULdi1	EDJ1	buccal	-6 days, 10:55:00
105 days, 2:25:00	76 days, 1:09:00	1 day, 1:33:00	BDL	1 day, 6:20:00	8 days, 13:24:00	BDL	10:13:00	BDL	BDL	00:09:00	00:49:00	00:08:00	00:55:00	00:26:00	ULdi1	EDJ1	buccal	-6 days, 11:25:00
105 days, 10:32:00	77 days, 20:30:00	1 day, 2:23:00	BDL	1 day, 9:00:00	8 days, 10:39:00	BDL	10:07:00	BDL	BDL	00:02:00	00:50:00	00:09:00	00:55:00	00:26:00	ULdi1	EDJ1	buccal	-6 days, 11:54:00
105 days, 17:58:00	75 days, 22:59:00	19:39:00	BDL	1 day, 5:34:00	8 days, 14:16:00	BDL	09:18:00	BDL	BDL	00:01:00	00:49:00	00:08:00	00:56:00	00:25:00	ULdi1	EDJ1	buccal	-6 days, 11:43:00
106 days, 1:25:00	76 days, 12:48:00	1 day, 2:19:00	BDL	1 day, 7:04:00	8 days, 17:09:00	BDL	09:28:00	BDL	BDL	00:02:00	00:50:00	00:08:00	00:57:00	00:24:00	ULdi1	EDJ1	buccal	-6 days, 12:12:00
106 days, 9:32:00	77 days, 4:53:00	1 day, 1:13:00	BDL	1 day, 6:57:00	8 days, 21:34:00	BDL	09:40:00	BDL	BDL	BDL	00:50:00	00:08:00	00:58:00	00:25:00	ULdi1	EDJ1	buccal	-6 days, 12:42:00
106 days, 16:58:00	78 days, 4:56:00	1 day, 8:00:00	BDL	23:06:00	8 days, 22:23:00	BDL	09:30:00	BDL	BDL	00:01:00	00:51:00	00:06:00	00:58:00	00:25:00	ULdi1	EDJ1	buccal	-6 days, 12:31:00
107 days, 0:26:00	76 days, 12:24:00	1 day, 3:06:00	BDL	1 day, 2:01:00	8 days, 12:12:00	BDL	09:04:00	BDL	BDL	BDL	00:50:00	00:07:00	00:55:00	00:23:00	ULdi1	EDJ1	buccal	-6 days, 13:01:00
107 days, 8:32:00	77 days, 19:04:00	23:28:00	BDL	1 day, 6:08:00	8 days, 18:21:00	BDL	09:11:00	BDL	BDL	00:03:00	00:50:00	00:08:00	00:57:00	00:24:00	ULdi1	EDJ1	buccal	-6 days, 13:30:00
107 days, 15:59:00	75 days, 18:34:00	1 day, 1:05:00	BDL	1 day, 9:35:00	8 days, 18:34:00	BDL	08:59:00	00:08:00	BDL	BDL	00:49:00	00:09:00	00:57:00	00:23:00	ULdi1	EDJ1	buccal	-6 days, 14:00:00
107 days, 23:25:00	77 days, 4:33:00	19:04:00	BDL	1 day, 10:21:00	8 days, 14:01:00	BDL	08:56:00	BDL	00:08:00	BDL	00:50:00	00:09:00	00:56:00	00:23:00	ULdi1	EDJ1	buccal	-6 days, 13:50:00
108 days, 7:32:00	75 days, 12:54:00	17:52:00	BDL	1 day, 6:35:00	8 days, 14:32:00	BDL	07:57:00	BDL	BDL	BDL	00:49:00	00:08:00	00:56:00	00:20:00	ULdi1	EDJ1	buccal	-6 days, 14:19:00
108 days, 14:58:00	78 days, 6:39:00	1 day, 0:48:00	BDL	1 day, 0:39:00	8 days, 16:18:00	BDL	09:10:00	BDL	00:16:00	00:04:00	00:51:00	00:07:00	00:56:00	00:24:00	ULdi1	EDJ1	buccal	-6 days, 14:49:00
108 days, 22:25:00	76 days, 9:23:00	1 day, 0:22:00	BDL	1 day, 9:57:00	8 days, 20:16:00	BDL	09:38:00	BDL	00:08:00	00:02:00	00:50:00	00:09:00	00:57:00	00:25:00	ULdi1	EDJ1	buccal	-6 days, 14:39:00
109 days, 6:32:00	78 days, 10:15:00	19:09:00	BDL	1 day, 19:20:00	8 days, 16:56:00	BDL	09:34:00	BDL	BDL	00:01:00	00:51:00	00:12:00	00:56:00	00:24:00	ULdi1	EDJ1	buccal	-6 days, 15:09:00
109 days, 13:59:00	75 days, 16:57:00	23:34:00	BDL	1 day, 7:30:00	8 days, 19:12:00	BDL	08:42:00	BDL	BDL	BDL	00:49:00	00:08:00	00:57:00	00:23:00	ULdi1	EDJ1	buccal	-6 days, 15:39:00
109 days, 21:25:00	76 days, 23:18:00	1 day, 1:25:00	BDL	1 day, 19:27:00	8 days, 20:25:00	BDL	08:39:00	BDL	BDL	BDL	00:50:00	00:12:00	00:57:00	00:23:00	ULdi1	EDJ1	buccal	-6 days, 15:29:00
110 days, 5:32:00	79 days, 5:28:00	1 day, 3:23:00	BDL	1 day, 10:06:00	8 days, 21:15:00	BDL	08:12:00	BDL	BDL	BDL	00:51:00	00:09:00	00:58:00	00:21:00	ULdi1	EDJ1	buccal	-6 days, 15:59:00
110 days, 12:58:00	78 days, 23:01:00	22:45:00	BDL	1 day, 0:00:00	8 days, 9:07:00	BDL	06:48:00	BDL	BDL	BDL	00:51:00	00:06:00	00:54:00	00:18:00	ULdi1	EDJ1	buccal	-6 days, 16:29:00
110 days, 20:25:00	80 days, 3:06:00	1 day, 0:12:00	BDL	1 day, 12:36:00	8 days, 10:19:00	BDL	06:04:00	BDL	BDL	BDL	00:52:00	00:10:00	00:55:00	00:15:00	ULdi1	EDJ1	buccal	-6 days, 16:59:00
111 days, 4:31:00	82 days, 3:11:00	23:24:00	BDL	1 day, 3:16:00	8 days, 16:33:00	BDL	07:03:00	00:06:00	00:11:00	BDL	00:53:00	00:07:00	00:56:00	00:18:00	ULdi1	EDJ1	buccal	-6 days, 16:49:00
111 days, 11:58:00	76 days, 16:07:00	19:26:00	BDL	1 day, 7:54:00	8 days, 15:01:00	BDL	07:31:00	BDL	BDL	00:03:00	00:50:00	00:09:00	00:56:00	00:20:00	ULdi1	EDJ1	buccal	-6 days, 17:19:00
111 days, 19:25:00	79 days, 8:43:00	23:22:00	BDL	1 day, 10:01:00	8 days, 19:08:00	BDL	09:10:00	BDL	BDL	00:17:00	00:51:00	00:09:00	00:57:00	00:25:00	ULdi1	EDJ1	buccal	-6 days, 17:49:00
112 days, 3:32:00	76 days, 20:01:00	21:09:00	BDL	1 day, 4:11:00	8 days, 18:55:00	BDL	11:57:00	BDL	00:11:00	00:33:00	00:50:00	00:07:00	00:57:00	00:31:00	ULdi1	EDJ1	buccal	-6 days, 17:39:00
112 days, 10:58:00	75 days, 8:09:00	1 day, 5:06:00	BDL	1 day, 1:22:00	8 days, 17:09:00	BDL	12:19:00	BDL	BDL	00:26:00	00:49:00	00:07:00	00:57:00	00:33:00	ULdi1	EDJ1	buccal	-6 days, 18:09:00
112 days, 18:25:00	74 days, 20:24:00	1 day, 1:07:00	BDL	1 day, 12:15:00	8 days, 14:45:00	BDL	12:03:00	BDL	BDL	00:38:00	00:49:00	00:10:00	00:56:00	00:31:00	ULdi1	EDJ1	buccal	-6 days, 18:39:00
113 days, 2:31:00	74 days, 20:50:00	22:21:00	BDL	1 day, 9:25:00	8 days, 18:14:00	BDL	12:06:00	BDL	BDL	00:24:00	00:49:00	00:09:00	00:57:00	00:33:00	ULdi1	EDJ1	buccal	-6 days, 18:30:00
113 days, 9:58:00	76 days, 20:41:00	18:02:00	BDL	1 day, 6:39:00	8 days, 11:31:00	BDL	11:26:00	BDL	BDL	00:24:00	00:50:00	00:08:00	00:55:00	00:29:00	ULdi1	EDJ1	buccal	-6 days, 19:00:00
113 days, 17:25:00	76 days, 16:31:00	22:01:00	BDL	1 day, 7:21:00	8 days, 10:37:00	BDL	12:25:00	BDL	00:07:00	00:34:00	00:50:00	00:08:00	00:55:00	00:32:00	ULdi1	EDJ1	buccal	-6 days, 19:30:00
114 days, 1:31:00	75 days, 0:38:00	1 day, 3:04:00	BDL	1 day, 0:53:00	8 days, 16:39:00	BDL	12:26:00	BDL	BDL	00:18:00	00:49:00	00:07:00	00:56:00	00:33:00	ULdi1	EDJ1	buccal	-6 days, 20:00:00
114 days, 8:58:00	77 days, 2:14:00	22:16:00	BDL	1 day, 11:23:00	8 days, 17:52:00	BDL	11:35:00	BDL	BDL	00:16:00	00:50:00	00:10:00	00:57:00	00:31:00	ULdi1	EDJ1	buccal	-6 days, 19:51:00
114 days, 16:24:00	73 days, 8:18:00	1 day, 1:13:00	BDL	1 day, 5:23:00	8 days, 7:24:00	BDL	11:31:00	BDL	BDL	00:12:00	00:48:00	00:08:00	00:54:00	00:29:00	ULdi1	EDJ1	buccal	-6 days, 20:21:00
115 days, 0:32:00	79 days, 18:29:00	1 day, 5:17:00	BDL	1 day, 11:20:00	8 days, 16:16:00	BDL	11:20:00	BDL	00:11:00	00:11:00	00:52:00	00:10:00	00:56:00	00:29:00	ULdi1	EDJ1	buccal	-6 days, 20:51:00
115 days, 7:58:00	81 days, 15:09:00	1 day, 0:47:00	BDL	1 day, 1:57:00	8 days, 23:01:00	BDL	12:21:00	BDL	BDL	00:17:00	00:53:00	00:07:00	00:58:00	00:32:00	ULdi1	EDJ1	buccal	-6 days, 20:42:00
115 days, 15:25:00	75 days, 7:54:00	1 day, 4:13:00	BDL	1 day, 11:55:00	8 days, 16:53:00	BDL	11:04:00	BDL	BDL	00:17:00	00:49:00	00:10:00	00:56:00	00:29:00	ULdi1	EDJ1	buccal	-6 days, 21:12:00
115 days, 23:31:00	75 days, 1:59:00	1 day, 1:12:00	BDL	1 day, 11:28:00	8 days, 22:08:00	BDL	10:19:00	BDL	BDL	00:09:00	00:49:00	00:10:00	00:58:00	00:28:00	ULdi1	EDJ1	buccal	-6 days, 21:42:00
116 days, 6:58:00	73 days, 20:49:00	21:35:00	02:01:00	1 day, 1:26:00	8 days, 20:02:00	BDL	11:35:00	BDL	00:08:00	00:16:00	00:48:00	00:07:00	00:57:00	00:30:00	ULdi1	EDJ1	buccal	-6 days, 21:33:00
116 days, 14:24:00	77 days, 9:09:00	1 day, 0:07:00	02:14:00	1 day, 5:16:00	8 days, 20:30:00	BDL	11:26:00	BDL	BDL	00:13:00	00:50:00	00:08:00	00:57:00	00:29:00	ULdi1	EDJ1	buccal	-6 days, 22:03:00
116 days, 22:31:00	76 days, 11:58:00	19:19:00	02:03:00	1 day, 9:16:00	8 days, 13:15:00	BDL	10:12:00	BDL	00:09:00	00:27:00	00:50:00	00:09:00	00:55:00	00:26:00	ULdi1	EDJ1	buccal	-6 days, 22:33:00
117 days, 5:58:00	77 days, 15:39:00	20:02:00	BDL	1 day, 10:29:00	8 days, 19:10:00	BDL	11:09:00	BDL	BDL	00:13:00	00:50:00	00:09:00	00:57:00	00:29:00	ULdi1	EDJ1	buccal	-6 days, 22:24:00
117 days, 13:25:00	75 days, 16:33:00	23:45:00	BDL	1 day, 5:45:00	8 days, 19:46:00	BDL	11:03:00	BDL	00:08:00	00:16:00	00:49:00	00:08:00	00:57:00	00:30:00	ULdi1	EDJ1	buccal	-6 days, 22:54:00
117 days, 21:31:00	76 days, 8:31:00	1 day, 0:52:00	BDL	1 day, 6:04:00	8 days, 21:30:00	BDL	11:29:00	BDL	BDL	00:17:00	00:50:00	00:08:00	00:58:00	00:29:00	ULdi1	EDJ1	buccal	-6 days, 23:24:00
118 days, 4:58:00	74 days, 12:38:00	1 day, 0:30:00	BDL	22:54:00	8 days, 16:37:00	BDL	11:18:00	BDL	BDL	00:18:00	00:48:00	00:06:00	00:56:00	00:29:00	ULdi1	EDJ1	buccal	-6 days, 23:55:00
118 days, 12:24:00	75 days, 23:36:00	1 day, 5:04:00	BDL	1 day, 14:54:00	8 days, 8:55:00	BDL	09:38:00	BDL	BDL	00:22:00	00:49:00	00:10:00	00:54:00	00:25:00	ULdi1	EDJ1	buccal	-6 days, 23:45:00
118 days, 20:31:00	77 days, 1:18:00	21:17:00	02:49:00	1 day, 7:28:00	8 days, 8:05:00	BDL	08:18:00	BDL	BDL	00:07:00	00:50:00	00:08:00	00:54:00	00:22:00	ULdi1	EDJ1	buccal	-5 days, 0:15:00
119 days, 3:57:00	77 days, 10:19:00	1 day, 0:17:00	02:03:00	1 day, 3:31:00	8 days, 6:34:00	BDL	07:38:00	BDL	00:08:00	00:07:00	00:50:00	00:07:00	00:54:00	00:19:00	ULdi1	EDJ1	buccal	-5 days, 0:46:00
119 days, 11:24:00	77 days, 9:01:00	1 day, 0:35:00	BDL	1 day, 1:40:00	8 days, 1:10:00	BDL	06:07:00	BDL	00:09:00	BDL	00:50:00	00:07:00	00:52:00	00:16:00	ULdi1	EDJ1	buccal	-5 days, 0:36:00
119 days, 19:31:00	79 days, 19:24:00	23:01:00	BDL	1 day, 0:27:00	8 days, 7:58:00	BDL	06:59:00	BDL	BDL	00:01:00	00:52:00	00:07:00	00:54:00	00:18:00	ULdi1	EDJ1	buccal	-5 days, 1:06:00
120 days, 2:57:00	75 days, 11:03:00	21:32:00	03:13:00	22:38:00	8 days, 7:30:00	BDL	08:23:00	BDL	00:13:00	00:26:00	00:49:00	00:06:00	00:54:00	00:21:00	ULdi1	EDJ1	buccal	-5 days, 1:37:00
120 days, 10:25:00	77 days, 4:46:00	1 day, 8:47:00	03:18:00	1 day, 8:08:00	8 days, 6:54:00	BDL	10:05:00	BDL	00:10:00	00:43:00	00:50:00	00:09:00	00:54:00	00:26:00	ULdi1	EDJ1	buccal	-5 days, 1:27:00
120 days, 18:31:00	75 days, 1:05:00	1 day, 8:03:00	03:47:00	1 day, 9:17:00	8 days, 2:22:00	BDL	11:12:00	BDL	BDL	00:44:00	00:49:00	00:09:00	00:52:00	00:29:00	ULdi1	EDJ1	buccal	-5 days, 1:57:00
121 days, 1:58:00	74 days, 8:08:00	1 day, 12:42:00	03:53:00	1 day, 2:37:00	8 days, 11:00:00	BDL	10:14:00	BDL	BDL	00:27:00	00:48:00	00:07:00	00:55:00	00:27:00	ULdi1	EDJ1	buccal	-5 days, 2:28:00
121 days, 9:24:00	72 days, 0:44:00	1 day, 4:22:00	02:26:00	1 day, 7:40:00	7 days, 20:39:00	BDL	08:57:00	BDL	BDL	00:37:00	00:47:00	00:08:00	00:51:00	00:23:00	ULdi1	EDJ1	buccal	-5 days, 2:58:00
121 days, 17:31:00	74 days, 21:02:00	1 day, 4:12:00	02:11:00	1 day, 14:05:00	8 days, 9:34:00	BDL	09:46:00	BDL	BDL	00:35:00	00:49:00	00:10:00	00:54:00	00:26:00	ULdi1	EDJ1	buccal	-5 days, 2:48:00
122 days, 0:57:00	73 days, 18:07:00	1 day, 8:56:00	03:04:00	1 day, 14:54:00	8 days, 0:45:00	BDL	10:22:00	BDL	BDL	00:39:00	00:48:00	00:10:00	00:52:00	00:28:00	ULdi1	EDJ1	buccal	-5 days, 3:18:00
122 days, 8:24:00	71 days, 20:03:00	2 days, 2:42:00	05:52:00	1 day, 8:18:00	8 days, 3:01:00	BDL	12:17:00	00:11:00	00:10:00	01:22:00	00:47:00	00:09:00	00:53:00	00:33:00	ULdi1	EDJ1	buccal	-5 days, 3:48:00
122 days, 16:31:00	75 days, 0:35:00	4 days, 4:27:00	05:59:00	1 day, 14:01:00	8 days, 12:35:00	BDL	12:37:00	00:09:00	00:17:00	01:02:00	00:49:00	00:10:00	00:55:00	00:32:00	ULdi1	EDJ1	buccal	-5 days, 3:38:00
122 days, 23:58:00	73 days, 15:22:00	4 days, 9:35:00	04:39:00	1 day, 4:58:00	8 days, 7:17:00	00:11:00	11:52:00	BDL	00:23:00	01:15:00	00:48:00	00:08:00	00:54:00	00:31:00	ULdi1	EDJ1	buccal	-5 days, 4:09:00
123 days, 7:24:00	75 days, 21:38:00	5 days, 14:01:00	05:27:00	1 day, 5:24:00	8 days, 7:28:00	00:12:00	13:31:00	00:14:00	00:26:00	01:22:00	00:49:00	00:08:00	00:54:00	00:36:00	ULdi1	EDJ1	buccal	-5 days, 4:39:00
123 days, 15:31:00	75 days, 8:50:00	5 days, 7:00:00	05:08:00	1 day, 11:03:00	8 days, 8:59:00	00:13:00	12:32:00	BDL	00:19:00	01:28:00	00:49:00	00:09:00	00:54:00	00:32:00	ULdi1	EDJ1	buccal	-5 days, 4:29:00
123 days, 22:57:00	72 days, 12:18:00	5 days, 4:13:00	06:25:00	1 day, 11:56:00	8 days, 3:11:00	BDL	13:23:00	00:20:00	00:27:00	01:16:00	00:47:00	00:10:00	00:53:00	00:35:00	ULdi1	EDJ1	buccal	-5 days, 4:59:00
124 days, 6:24:00	78 days, 11:33:00	4 days, 13:05:00	10:17:00	1 day, 11:06:00	8 days, 6:01:00	00:18:00	14:36:00	00:14:00	00:30:00	01:14:00	00:51:00	00:09:00	00:54:00	00:38:00	ULdi1	EDJ1	buccal	-5 days, 5:29:00
124 days, 14:30:00	72 days, 12:37:00	3 days, 17:17:00	12:57:00	1 day, 6:00:00	8 days, 7:08:00	BDL	12:33:00	00:13:00	00:32:00	01:11:00	00:47:00	00:08:00	00:54:00	00:33:00	ULdi1	EDJ1	buccal	-5 days, 5:59:00
124 days, 21:57:00	75 days, 13:28:00	3 days, 8:06:00	13:32:00	1 day, 3:29:00	8 days, 5:08:00	00:10:00	13:17:00	00:20:00	00:43:00	01:15:00	00:49:00	00:07:00	00:53:00	00:35:00	ULdi1	EDJ1	buccal	-5 days, 5:49:00
125 days, 5:24:00	71 days, 22:29:00	3 days, 9:25:00	14:43:00	1 day, 13:16:00	8 days, 8:39:00	00:31:00	13:59:00	00:21:00	01:00:00	01:24:00	00:47:00	00:10:00	00:54:00	00:37:00	ULdi1	EDJ1	buccal	-5 days, 6:18:00
125 days, 13:30:00	72 days, 10:22:00	3 days, 1:04:00	12:29:00	1 day, 18:31:00	8 days, 0:45:00	00:31:00	13:13:00	00:36:00	00:31:00	01:02:00	00:47:00	00:11:00	00:52:00	00:35:00	ULdi1	EDJ1	buccal	-5 days, 6:48:00
125 days, 20:57:00	72 days, 22:39:00	2 days, 19:55:00	19:32:00	1 day, 7:22:00	8 days, 0:56:00	00:28:00	15:02:00	00:32:00	00:46:00	01:03:00	00:47:00	00:08:00	00:52:00	00:41:00	ULdi1	EDJ1	buccal	-5 days, 6:38:00
126 days, 4:24:00	74 days, 9:18:00	2 days, 8:20:00	14:28:00	1 day, 3:31:00	7 days, 23:49:00	00:17:00	11:33:00	00:21:00	00:20:00	01:16:00	00:48:00	00:07:00	00:52:00	00:31:00	ULdi1	EDJ1	buccal	-5 days, 7:08:00
126 days, 12:30:00	70 days, 0:02:00	1 day, 22:26:00	10:00:00	1 day, 3:41:00	7 days, 20:38:00	00:19:00	11:08:00	00:22:00	00:29:00	01:03:00	00:45:00	00:07:00	00:51:00	00:30:00	ULdi1	EDJ1	buccal	-5 days, 7:38:00
126 days, 19:57:00	73 days, 17:28:00	1 day, 14:17:00	09:26:00	1 day, 1:03:00	7 days, 23:54:00	00:17:00	11:21:00	00:17:00	00:18:00	00:43:00	00:48:00	00:07:00	00:52:00	00:30:00	ULdi1	EDJ1	buccal	-5 days, 7:27:00
127 days, 3:24:00	71 days, 8:35:00	1 day, 10:34:00	08:07:00	1 day, 15:34:00	7 days, 23:33:00	00:11:00	13:35:00	00:14:00	00:18:00	01:09:00	00:46:00	00:11:00	00:52:00	00:36:00	ULdi1	EDJ1	buccal	-5 days, 7:57:00
127 days, 11:30:00	72 days, 23:05:00	1 day, 14:08:00	11:40:00	1 day, 10:19:00	8 days, 8:13:00	00:15:00	11:55:00	00:21:00	00:23:00	00:49:00	00:47:00	00:09:00	00:54:00	00:31:00	ULdi1	EDJ1	buccal	-5 days, 8:26:00
127 days, 18:57:00	72 days, 0:29:00	1 day, 11:15:00	09:09:00	1 day, 8:14:00	8 days, 0:20:00	00:17:00	11:42:00	00:17:00	00:19:00	01:02:00	00:47:00	00:09:00	00:52:00	00:31:00	ULdi1	EDJ1	buccal	-5 days, 8:56:00
128 days, 2:23:00	69 days, 22:21:00	4 days, 22:50:00	1 day, 4:19:00	1 day, 21:08:00	7 days, 18:43:00	00:59:00	15:11:00	01:27:00	01:05:00	01:34:00	00:45:00	00:12:00	00:50:00	00:40:00	ULdi1	EDJ1	buccal	-5 days, 8:45:00
128 days, 10:31:00	76 days, 21:33:00	7 days, 3:11:00	1 day, 5:38:00	1 day, 18:04:00	8 days, 13:11:00	00:49:00	16:54:00	01:13:00	00:39:00	01:19:00	00:50:00	00:11:00	00:55:00	00:45:00	ULdi1	EDJ1	buccal	-5 days, 9:15:00
128 days, 17:57:00	73 days, 16:23:00	3 days, 13:48:00	16:08:00	1 day, 15:50:00	8 days, 1:22:00	00:46:00	13:12:00	00:38:00	00:29:00	01:02:00	00:48:00	00:11:00	00:52:00	00:34:00	ULdi1	EDJ1	buccal	-5 days, 9:44:00
129 days, 1:24:00	74 days, 7:27:00	2 days, 3:36:00	12:21:00	1 day, 19:07:00	8 days, 2:07:00	00:35:00	11:45:00	00:27:00	00:35:00	01:09:00	00:48:00	00:12:00	00:52:00	00:31:00	ULdi1	EDJ1	buccal	-5 days, 9:33:00
129 days, 9:30:00	74 days, 3:18:00	2 days, 6:36:00	12:02:00	2 days, 1:27:00	8 days, 1:09:00	00:31:00	11:59:00	00:12:00	00:27:00	01:37:00	00:48:00	00:13:00	00:52:00	00:31:00	ULdi1	EDJ1	buccal	-5 days, 10:02:00
129 days, 16:57:00	74 days, 21:27:00	4 days, 5:06:00	1 day, 0:37:00	1 day, 14:15:00	8 days, 4:37:00	00:46:00	13:41:00	01:15:00	01:06:00	01:12:00	00:49:00	00:10:00	00:53:00	00:36:00	ULdi1	EDJ1	buccal	-5 days, 10:32:00
130 days, 0:23:00	77 days, 16:21:00	5 days, 20:49:00	2 days, 10:37:00	1 day, 17:45:00	8 days, 9:48:00	00:53:00	18:01:00	01:09:00	01:08:00	01:48:00	00:50:00	00:11:00	00:54:00	00:48:00	ULdi1	EDJ1	buccal	-5 days, 10:21:00
130 days, 8:30:00	74 days, 12:29:00	4 days, 5:26:00	1 day, 8:04:00	1 day, 16:11:00	8 days, 11:12:00	00:51:00	15:10:00	01:08:00	00:40:00	01:25:00	00:48:00	00:11:00	00:55:00	00:41:00	ULdi1	EDJ1	buccal	-5 days, 10:50:00
130 days, 15:57:00	71 days, 4:38:00	1 day, 23:08:00	20:35:00	1 day, 9:56:00	8 days, 7:24:00	00:41:00	14:04:00	00:28:00	00:17:00	01:28:00	00:46:00	00:09:00	00:54:00	00:37:00	ULdi1	EDJ1	buccal	-5 days, 11:19:00
130 days, 23:24:00	72 days, 5:27:00	1 day, 16:04:00	09:42:00	1 day, 14:07:00	8 days, 7:09:00	00:19:00	12:26:00	00:12:00	00:08:00	00:58:00	00:47:00	00:10:00	00:54:00	00:32:00	ULdi1	EDJ1	buccal	-5 days, 11:48:00
131 days, 7:30:00	70 days, 23:57:00	1 day, 6:04:00	05:18:00	1 day, 15:27:00	8 days, 7:33:00	BDL	11:09:00	BDL	00:08:00	00:34:00	00:46:00	00:11:00	00:54:00	00:30:00	ULdi1	EDJ1	buccal	-5 days, 11:37:00
131 days, 14:57:00	70 days, 15:09:00	1 day, 3:25:00	02:27:00	1 day, 2:19:00	7 days, 22:17:00	BDL	10:27:00	BDL	00:10:00	00:37:00	00:46:00	00:07:00	00:51:00	00:28:00	ULdi1	EDJ1	buccal	-5 days, 12:06:00
131 days, 22:23:00	72 days, 18:47:00	1 day, 4:04:00	02:39:00	1 day, 8:36:00	7 days, 23:00:00	BDL	09:46:00	BDL	BDL	00:28:00	00:47:00	00:09:00	00:52:00	00:26:00	ULdi1	EDJ1	buccal	-5 days, 12:35:00
132 days, 6:30:00	70 days, 3:20:00	1 day, 2:49:00	BDL	1 day, 5:35:00	8 days, 3:29:00	BDL	09:35:00	BDL	BDL	00:32:00	00:45:00	00:08:00	00:53:00	00:25:00	ULdi1	EDJ1	buccal	-5 days, 12:24:00
132 days, 13:56:00	76 days, 7:23:00	1 day, 4:14:00	BDL	1 day, 9:19:00	8 days, 2:41:00	BDL	10:45:00	BDL	BDL	00:54:00	00:49:00	00:09:00	00:53:00	00:28:00	ULdi1	EDJ1	buccal	-5 days, 12:53:00
132 days, 21:23:00	71 days, 3:55:00	1 day, 7:05:00	BDL	1 day, 9:07:00	7 days, 22:30:00	BDL	10:06:00	BDL	BDL	00:37:00	00:46:00	00:09:00	00:51:00	00:27:00	ULdi1	EDJ1	buccal	-5 days, 13:22:00
133 days, 5:30:00	68 days, 13:02:00	1 day, 12:14:00	BDL	1 day, 5:03:00	7 days, 23:16:00	BDL	11:05:00	BDL	BDL	00:51:00	00:44:00	00:08:00	00:52:00	00:30:00	ULdi1	EDJ1	buccal	-5 days, 13:51:00
133 days, 12:56:00	68 days, 10:58:00	22:16:00	BDL	1 day, 5:01:00	7 days, 19:13:00	BDL	10:39:00	BDL	BDL	00:52:00	00:44:00	00:08:00	00:50:00	00:27:00	ULdi1	EDJ1	buccal	-5 days, 13:40:00
133 days, 20:24:00	73 days, 9:23:00	1 day, 8:32:00	BDL	1 day, 3:13:00	8 days, 0:45:00	BDL	10:11:00	BDL	BDL	00:36:00	00:48:00	00:07:00	00:52:00	00:27:00	ULdi1	EDJ1	buccal	-5 days, 14:08:00
134 days, 4:30:00	68 days, 15:28:00	1 day, 12:22:00	02:48:00	1 day, 3:11:00	7 days, 20:35:00	BDL	10:39:00	BDL	BDL	00:42:00	00:45:00	00:07:00	00:51:00	00:27:00	ULdi1	EDJ1	buccal	-5 days, 14:37:00
134 days, 11:57:00	69 days, 4:43:00	23:08:00	BDL	1 day, 2:07:00	8 days, 1:08:00	BDL	09:19:00	BDL	BDL	00:28:00	00:45:00	00:07:00	00:52:00	00:25:00	ULdi1	EDJ1	buccal	-5 days, 14:26:00
134 days, 19:23:00	69 days, 12:32:00	1 day, 6:10:00	02:45:00	1 day, 9:26:00	8 days, 2:12:00	BDL	10:07:00	BDL	00:18:00	00:30:00	00:45:00	00:09:00	00:52:00	00:26:00	ULdi1	EDJ1	buccal	-5 days, 14:55:00
135 days, 3:30:00	70 days, 2:20:00	1 day, 2:21:00	03:51:00	1 day, 9:26:00	8 days, 5:17:00	BDL	09:30:00	BDL	BDL	00:27:00	00:45:00	00:09:00	00:53:00	00:25:00	ULdi1	EDJ1	buccal	-5 days, 15:23:00
135 days, 10:56:00	72 days, 0:16:00	21:48:00	BDL	1 day, 5:57:00	7 days, 21:39:00	BDL	09:28:00	BDL	BDL	00:26:00	00:47:00	00:08:00	00:51:00	00:25:00	ULdi1	EDJ1	buccal	-5 days, 15:52:00
135 days, 18:23:00	73 days, 12:34:00	21:37:00	02:15:00	1 day, 2:15:00	7 days, 23:05:00	BDL	08:13:00	BDL	BDL	00:13:00	00:48:00	00:07:00	00:52:00	00:22:00	ULdi1	EDJ1	buccal	-5 days, 15:41:00
136 days, 2:30:00	68 days, 4:10:00	1 day, 3:09:00	02:45:00	1 day, 6:25:00	7 days, 23:07:00	BDL	09:13:00	BDL	BDL	00:10:00	00:44:00	00:08:00	00:52:00	00:24:00	ULdi1	EDJ1	buccal	-5 days, 16:10:00
136 days, 9:57:00	72 days, 14:08:00	1 day, 1:39:00	03:08:00	1 day, 7:18:00	7 days, 19:16:00	BDL	09:11:00	BDL	BDL	00:11:00	00:47:00	00:08:00	00:50:00	00:25:00	ULdi1	EDJ1	buccal	-5 days, 16:38:00
136 days, 17:23:00	73 days, 0:22:00	1 day, 1:18:00	03:10:00	1 day, 4:52:00	8 days, 7:16:00	BDL	09:18:00	BDL	BDL	00:15:00	00:47:00	00:08:00	00:54:00	00:24:00	ULdi1	EDJ1	buccal	-5 days, 16:27:00
137 days, 1:30:00	71 days, 5:31:00	20:20:00	03:10:00	1 day, 10:34:00	7 days, 20:56:00	BDL	09:30:00	BDL	BDL	00:13:00	00:46:00	00:09:00	00:51:00	00:24:00	ULdi1	EDJ1	buccal	-5 days, 16:56:00
137 days, 8:56:00	71 days, 6:56:00	1 day, 2:47:00	03:32:00	1 day, 8:28:00	8 days, 5:05:00	BDL	09:08:00	BDL	BDL	00:29:00	00:46:00	00:09:00	00:53:00	00:23:00	ULdi1	EDJ1	buccal	-5 days, 17:24:00
137 days, 16:23:00	72 days, 8:25:00	1 day, 4:45:00	04:11:00	1 day, 5:41:00	7 days, 23:03:00	BDL	09:09:00	BDL	BDL	00:20:00	00:47:00	00:08:00	00:52:00	00:25:00	ULdi1	EDJ1	buccal	-5 days, 17:53:00
138 days, 0:29:00	72 days, 9:31:00	23:04:00	05:38:00	1 day, 8:11:00	7 days, 23:25:00	BDL	08:47:00	BDL	BDL	00:24:00	00:47:00	00:09:00	00:52:00	00:23:00	ULdi1	EDJ1	buccal	-5 days, 17:42:00
138 days, 7:56:00	69 days, 16:24:00	1 day, 2:05:00	05:06:00	1 day, 5:38:00	7 days, 20:33:00	BDL	09:21:00	BDL	BDL	00:26:00	00:45:00	00:08:00	00:51:00	00:25:00	ULdi1	EDJ1	buccal	-5 days, 18:10:00
138 days, 15:23:00	68 days, 22:06:00	17:52:00	07:04:00	1 day, 4:32:00	8 days, 1:33:00	BDL	09:01:00	BDL	00:12:00	00:14:00	00:45:00	00:08:00	00:52:00	00:23:00	ULdi1	EDJ1	buccal	-5 days, 18:39:00
138 days, 23:29:00	72 days, 19:19:00	1 day, 0:34:00	07:26:00	1 day, 9:58:00	7 days, 22:13:00	BDL	09:58:00	00:12:00	BDL	00:26:00	00:47:00	00:09:00	00:51:00	00:26:00	ULdi1	EDJ1	buccal	-5 days, 18:28:00
139 days, 6:56:00	71 days, 22:54:00	1 day, 18:30:00	07:24:00	1 day, 6:47:00	7 days, 19:06:00	BDL	09:35:00	BDL	00:09:00	00:09:00	00:47:00	00:08:00	00:51:00	00:25:00	ULdi1	EDJ1	buccal	-5 days, 18:56:00
139 days, 14:23:00	73 days, 20:31:00	1 day, 1:01:00	02:13:00	1 day, 1:56:00	7 days, 19:13:00	BDL	08:08:00	BDL	00:09:00	00:14:00	00:48:00	00:07:00	00:51:00	00:21:00	ULdi1	EDJ1	buccal	-5 days, 19:25:00
139 days, 22:29:00	75 days, 0:02:00	18:10:00	BDL	1 day, 9:17:00	8 days, 0:40:00	BDL	07:00:00	BDL	BDL	00:01:00	00:49:00	00:09:00	00:52:00	00:19:00	ULdi1	EDJ1	buccal	-5 days, 19:54:00
140 days, 5:56:00	76 days, 13:37:00	21:47:00	BDL	1 day, 7:05:00	8 days, 5:39:00	BDL	07:31:00	BDL	BDL	00:01:00	00:50:00	00:08:00	00:53:00	00:19:00	ULdi1	EDJ1	buccal	-5 days, 19:43:00
140 days, 13:23:00	73 days, 7:21:00	14:33:00	BDL	1 day, 3:37:00	7 days, 23:33:00	BDL	07:07:00	BDL	BDL	BDL	00:48:00	00:07:00	00:52:00	00:18:00	ULdi1	EDJ1	buccal	-5 days, 20:11:00
140 days, 21:29:00	76 days, 11:15:00	22:24:00	BDL	1 day, 4:07:00	8 days, 0:31:00	BDL	07:26:00	BDL	BDL	00:05:00	00:50:00	00:07:00	00:52:00	00:20:00	ULdi1	EDJ1	buccal	-5 days, 20:40:00
141 days, 4:56:00	76 days, 19:26:00	15:02:00	02:15:00	1 day, 3:35:00	8 days, 1:27:00	BDL	09:00:00	BDL	00:09:00	00:13:00	00:50:00	00:07:00	00:52:00	00:23:00	ULdi1	EDJ1	buccal	-5 days, 20:29:00
141 days, 12:22:00	73 days, 12:37:00	3 days, 20:24:00	14:11:00	1 day, 8:21:00	8 days, 7:46:00	00:47:00	14:20:00	01:20:00	01:08:00	01:36:00	00:48:00	00:09:00	00:54:00	00:37:00	ULdi1	EDJ1	buccal	-5 days, 20:58:00
141 days, 20:30:00	77 days, 9:15:00	16 days, 16:30:00	2 days, 7:58:00	1 day, 18:31:00	8 days, 8:37:00	00:53:00	16:15:00	01:06:00	01:19:00	01:12:00	00:50:00	00:11:00	00:54:00	00:44:00	ULdi1	EDJ1	buccal	-5 days, 21:26:00
142 days, 3:56:00	74 days, 16:56:00	4 days, 22:03:00	19:02:00	1 day, 2:20:00	7 days, 23:25:00	00:26:00	09:53:00	00:40:00	00:13:00	00:38:00	00:48:00	00:07:00	00:52:00	00:26:00	ULdi1	EDJ1	buccal	-5 days, 21:55:00
142 days, 11:23:00	73 days, 0:36:00	1 day, 19:02:00	03:38:00	1 day, 1:17:00	8 days, 0:31:00	BDL	07:20:00	00:06:00	BDL	00:06:00	00:47:00	00:07:00	00:52:00	00:19:00	ULdi1	EDJ1	buccal	-5 days, 21:44:00
142 days, 19:29:00	73 days, 18:31:00	23:31:00	02:33:00	1 day, 4:32:00	7 days, 19:42:00	BDL	07:10:00	BDL	BDL	00:01:00	00:48:00	00:08:00	00:51:00	00:18:00	ULdi1	EDJ1	buccal	-5 days, 22:13:00
143 days, 2:56:00	71 days, 5:06:00	17:38:00	BDL	1 day, 5:45:00	7 days, 22:49:00	BDL	07:33:00	BDL	BDL	00:06:00	00:46:00	00:08:00	00:51:00	00:20:00	ULdi1	EDJ1	buccal	-5 days, 22:42:00
143 days, 10:22:00	74 days, 10:58:00	22:05:00	02:38:00	1 day, 5:37:00	8 days, 3:05:00	00:10:00	09:22:00	00:06:00	BDL	00:41:00	00:48:00	00:08:00	00:53:00	00:24:00	ULdi1	EDJ1	buccal	-5 days, 22:30:00
143 days, 18:29:00	74 days, 5:42:00	18:40:00	04:17:00	1 day, 8:39:00	8 days, 3:39:00	BDL	10:50:00	BDL	00:16:00	00:46:00	00:48:00	00:09:00	00:53:00	00:28:00	ULdi1	EDJ1	buccal	-5 days, 22:59:00
144 days, 1:56:00	71 days, 21:28:00	1 day, 0:40:00	04:18:00	1 day, 0:27:00	8 days, 1:02:00	00:12:00	10:57:00	00:08:00	BDL	00:43:00	00:47:00	00:07:00	00:52:00	00:29:00	ULdi1	EDJ1	buccal	-5 days, 23:28:00
144 days, 9:23:00	69 days, 16:01:00	22:31:00	02:17:00	1 day, 3:18:00	7 days, 22:05:00	BDL	10:29:00	BDL	BDL	00:53:00	00:45:00	00:07:00	00:51:00	00:28:00	ULdi1	EDJ1	buccal	-5 days, 23:57:00
144 days, 17:29:00	70 days, 4:33:00	1 day, 1:33:00	03:13:00	23:30:00	7 days, 21:02:00	00:15:00	10:02:00	BDL	00:08:00	00:50:00	00:46:00	00:06:00	00:51:00	00:26:00	ULdi1	EDJ1	buccal	-5 days, 23:46:00
145 days, 0:56:00	74 days, 8:26:00	22:10:00	04:12:00	1 day, 7:22:00	8 days, 11:10:00	00:15:00	11:28:00	00:06:00	00:08:00	01:20:00	00:48:00	00:08:00	00:55:00	00:29:00	ULdi1	EDJ1	buccal	-4 days, 0:15:00
145 days, 8:22:00	70 days, 1:38:00	23:26:00	04:22:00	1 day, 11:04:00	8 days, 3:29:00	00:14:00	11:27:00	00:19:00	00:18:00	01:20:00	00:45:00	00:09:00	00:53:00	00:30:00	ULdi1	EDJ1	buccal	-4 days, 0:44:00
145 days, 16:29:00	74 days, 13:07:00	1 day, 4:41:00	08:00:00	1 day, 12:09:00	8 days, 11:20:00	00:29:00	14:20:00	00:28:00	00:17:00	02:01:00	00:48:00	00:10:00	00:55:00	00:37:00	ULdi1	EDJ1	buccal	-4 days, 0:33:00
145 days, 23:55:00	72 days, 13:16:00	22:04:00	06:15:00	1 day, 4:56:00	7 days, 21:26:00	00:17:00	10:38:00	00:16:00	BDL	01:13:00	00:47:00	00:08:00	00:51:00	00:28:00	ULdi1	EDJ1	buccal	-4 days, 1:03:00
146 days, 7:22:00	73 days, 23:26:00	21:12:00	03:56:00	1 day, 10:49:00	8 days, 3:54:00	BDL	09:46:00	BDL	BDL	00:23:00	00:48:00	00:09:00	00:53:00	00:26:00	ULdi1	EDJ1	buccal	-4 days, 1:32:00
146 days, 15:29:00	73 days, 3:00:00	19:18:00	BDL	1 day, 3:59:00	7 days, 22:03:00	BDL	07:01:00	BDL	00:09:00	00:05:00	00:47:00	00:07:00	00:51:00	00:19:00	ULdi1	EDJ1	buccal	-4 days, 1:21:00
146 days, 22:55:00	77 days, 1:03:00	BDL	BDL	1 day, 2:50:00	8 days, 1:39:00	BDL	06:17:00	BDL	BDL	00:07:00	00:50:00	00:07:00	00:52:00	00:17:00	ULdi1	EDJ1	buccal	-4 days, 1:50:00
147 days, 6:23:00	71 days, 4:51:00	21:49:00	02:07:00	1 day, 7:32:00	7 days, 12:08:00	BDL	07:05:00	BDL	BDL	00:03:00	00:46:00	00:08:00	00:49:00	00:18:00	ULdi1	EDJ1	buccal	-4 days, 2:20:00
147 days, 14:29:00	71 days, 14:25:00	17:29:00	BDL	1 day, 6:50:00	8 days, 1:53:00	BDL	07:16:00	BDL	BDL	00:02:00	00:46:00	00:08:00	00:52:00	00:19:00	ULdi1	EDJ1	buccal	-4 days, 2:49:00
147 days, 21:56:00	74 days, 10:24:00	18:35:00	BDL	23:04:00	7 days, 15:34:00	BDL	07:01:00	BDL	BDL	00:02:00	00:48:00	00:06:00	00:49:00	00:18:00	ULdi1	EDJ1	buccal	-4 days, 2:38:00
148 days, 5:22:00	73 days, 19:01:00	15:31:00	BDL	1 day, 10:15:00	7 days, 20:08:00	BDL	06:18:00	BDL	BDL	00:01:00	00:48:00	00:09:00	00:51:00	00:17:00	ULdi1	EDJ1	buccal	-4 days, 3:08:00
148 days, 13:29:00	76 days, 13:20:00	18:18:00	BDL	1 day, 9:17:00	8 days, 5:42:00	BDL	05:58:00	BDL	BDL	BDL	00:50:00	00:09:00	00:53:00	00:15:00	ULdi1	EDJ1	buccal	-4 days, 3:37:00
148 days, 20:55:00	74 days, 17:32:00	14:31:00	BDL	1 day, 6:14:00	8 days, 1:52:00	BDL	06:20:00	BDL	BDL	BDL	00:48:00	00:08:00	00:52:00	00:16:00	ULdi1	EDJ1	buccal	-4 days, 3:27:00
149 days, 4:22:00	73 days, 2:37:00	16:05:00	BDL	1 day, 9:16:00	7 days, 23:39:00	BDL	05:29:00	BDL	BDL	BDL	00:47:00	00:09:00	00:52:00	00:14:00	ULdi1	EDJ1	buccal	-4 days, 3:56:00
149 days, 12:29:00	74 days, 23:13:00	BDL	BDL	23:13:00	7 days, 22:22:00	BDL	06:09:00	BDL	BDL	BDL	00:49:00	00:06:00	00:51:00	00:15:00	ULdi1	EDJ1	buccal	-4 days, 4:26:00
149 days, 19:56:00	73 days, 17:19:00	19:46:00	BDL	1 day, 6:03:00	7 days, 19:37:00	BDL	05:49:00	BDL	BDL	BDL	00:48:00	00:08:00	00:51:00	00:15:00	ULdi1	EDJ1	buccal	-4 days, 4:56:00
150 days, 3:22:00	72 days, 20:36:00	18:22:00	BDL	1 day, 6:24:00	7 days, 20:30:00	BDL	05:34:00	BDL	BDL	BDL	00:47:00	00:08:00	00:51:00	00:14:00	ULdi1	EDJ1	buccal	-4 days, 4:45:00
150 days, 11:29:00	73 days, 4:12:00	16:21:00	BDL	1 day, 5:17:00	7 days, 21:06:00	BDL	05:20:00	BDL	BDL	BDL	00:47:00	00:08:00	00:51:00	00:14:00	ULdi1	EDJ1	buccal	-4 days, 5:15:00
150 days, 18:55:00	75 days, 15:18:00	15:06:00	BDL	1 day, 1:39:00	8 days, 2:09:00	BDL	05:29:00	BDL	BDL	BDL	00:49:00	00:07:00	00:52:00	00:14:00	ULdi1	EDJ1	buccal	-4 days, 5:45:00
151 days, 2:22:00	73 days, 22:00:00	16:13:00	BDL	1 day, 8:39:00	7 days, 22:07:00	BDL	05:09:00	BDL	BDL	BDL	00:48:00	00:09:00	00:51:00	00:13:00	ULdi1	EDJ1	buccal	-4 days, 5:35:00
151 days, 10:28:00	72 days, 11:05:00	15:59:00	BDL	1 day, 7:15:00	7 days, 16:56:00	BDL	04:48:00	BDL	00:09:00	BDL	00:47:00	00:08:00	00:50:00	00:12:00	ULdi1	EDJ1	buccal	-4 days, 6:05:00
151 days, 17:55:00	74 days, 1:50:00	BDL	BDL	1 day, 7:09:00	7 days, 16:59:00	BDL	05:02:00	BDL	BDL	BDL	00:48:00	00:08:00	00:50:00	00:14:00	ULdi1	EDJ1	buccal	-4 days, 6:35:00
152 days, 1:22:00	73 days, 9:39:00	BDL	BDL	23:01:00	7 days, 19:12:00	BDL	05:34:00	BDL	BDL	BDL	00:48:00	00:06:00	00:50:00	00:13:00	ULdi1	EDJ1	buccal	-4 days, 6:25:00
152 days, 9:28:00	75 days, 22:19:00	18:12:00	BDL	1 day, 3:09:00	8 days, 9:02:00	BDL	05:22:00	BDL	BDL	BDL	00:49:00	00:07:00	00:54:00	00:13:00	ULdi1	EDJ1	buccal	-4 days, 6:55:00
152 days, 16:55:00	74 days, 14:31:00	BDL	BDL	22:56:00	8 days, 0:19:00	BDL	05:20:00	BDL	BDL	BDL	00:48:00	00:06:00	00:52:00	00:14:00	ULdi1	EDJ1	buccal	-4 days, 7:25:00
153 days, 0:22:00	75 days, 5:45:00	BDL	BDL	1 day, 1:30:00	7 days, 19:16:00	BDL	05:18:00	BDL	BDL	BDL	00:49:00	00:07:00	00:50:00	00:14:00	ULdi1	EDJ1	buccal	-4 days, 7:56:00
153 days, 8:28:00	71 days, 23:52:00	BDL	BDL	1 day, 6:13:00	7 days, 18:00:00	BDL	04:08:00	BDL	BDL	BDL	00:47:00	00:08:00	00:50:00	00:11:00	ULdi1	EDJ1	buccal	-4 days, 7:46:00
153 days, 15:55:00	73 days, 18:01:00	15:32:00	BDL	1 day, 7:36:00	7 days, 20:33:00	BDL	05:21:00	BDL	BDL	BDL	00:48:00	00:08:00	00:51:00	00:13:00	ULdi1	EDJ1	buccal	-4 days, 8:17:00
153 days, 23:22:00	75 days, 1:15:00	16:24:00	BDL	1 day, 9:54:00	7 days, 20:42:00	BDL	05:12:00	BDL	BDL	BDL	00:49:00	00:09:00	00:51:00	00:13:00	ULdi1	EDJ1	buccal	-4 days, 8:47:00
154 days, 7:28:00	75 days, 4:25:00	BDL	BDL	23:48:00	8 days, 0:16:00	BDL	04:27:00	BDL	BDL	BDL	00:49:00	00:06:00	00:52:00	00:12:00	ULdi1	EDJ1	buccal	-4 days, 8:38:00
154 days, 14:55:00	74 days, 20:14:00	15:42:00	BDL	1 day, 4:03:00	7 days, 20:32:00	BDL	05:01:00	BDL	BDL	BDL	00:49:00	00:07:00	00:51:00	00:12:00	ULdi1	EDJ1	buccal	-4 days, 9:08:00
154 days, 22:21:00	76 days, 7:10:00	14:21:00	BDL	1 day, 8:47:00	8 days, 0:09:00	BDL	04:16:00	BDL	BDL	BDL	00:49:00	00:09:00	00:52:00	00:11:00	ULdi1	EDJ1	buccal	-4 days, 9:39:00
155 days, 6:29:00	76 days, 6:39:00	14:16:00	BDL	1 day, 4:01:00	8 days, 1:22:00	BDL	05:05:00	BDL	BDL	BDL	00:49:00	00:08:00	00:52:00	00:13:00	ULdi1	EDJ1	buccal	-4 days, 9:30:00
155 days, 13:55:00	74 days, 5:08:00	BDL	BDL	1 day, 2:43:00	7 days, 17:32:00	BDL	04:11:00	BDL	BDL	BDL	00:48:00	00:07:00	00:50:00	00:10:00	ULdi1	EDJ1	buccal	-4 days, 10:01:00
155 days, 21:22:00	78 days, 10:53:00	16:15:00	BDL	1 day, 7:12:00	8 days, 3:27:00	BDL	05:20:00	BDL	BDL	BDL	00:51:00	00:08:00	00:53:00	00:13:00	ULdi1	EDJ1	buccal	-4 days, 10:32:00
156 days, 5:28:00	77 days, 17:09:00	17:12:00	BDL	1 day, 2:49:00	8 days, 3:09:00	BDL	04:14:00	BDL	BDL	BDL	00:50:00	00:07:00	00:53:00	00:10:00	ULdi1	EDJ1	buccal	-4 days, 10:23:00
156 days, 12:55:00	73 days, 18:36:00	BDL	BDL	22:03:00	7 days, 23:17:00	BDL	04:04:00	00:06:00	BDL	BDL	00:48:00	00:06:00	00:52:00	00:11:00	ULdi1	EDJ1	buccal	-4 days, 10:54:00
156 days, 20:21:00	76 days, 21:59:00	20:19:00	BDL	1 day, 5:23:00	7 days, 19:48:00	BDL	03:48:00	BDL	BDL	BDL	00:50:00	00:08:00	00:51:00	00:09:00	ULdi1	EDJ1	buccal	-4 days, 11:26:00
157 days, 4:28:00	77 days, 4:38:00	18:55:00	BDL	1 day, 3:55:00	8 days, 0:02:00	BDL	04:23:00	BDL	BDL	BDL	00:50:00	00:07:00	00:52:00	00:11:00	ULdi1	EDJ1	buccal	-4 days, 11:57:00
157 days, 11:55:00	76 days, 2:13:00	BDL	BDL	19:57:00	7 days, 20:53:00	BDL	04:09:00	BDL	BDL	BDL	00:49:00	00:05:00	00:51:00	00:10:00	ULdi1	EDJ1	buccal	-4 days, 11:48:00
157 days, 19:22:00	76 days, 7:49:00	18:34:00	BDL	1 day, 6:57:00	8 days, 3:51:00	BDL	04:22:00	BDL	BDL	BDL	00:49:00	00:08:00	00:53:00	00:11:00	ULdi1	EDJ1	buccal	-4 days, 12:20:00
158 days, 3:28:00	78 days, 18:35:00	BDL	BDL	1 day, 4:36:00	8 days, 4:21:00	BDL	04:31:00	BDL	BDL	BDL	00:51:00	00:08:00	00:53:00	00:11:00	ULdi1	EDJ1	buccal	-4 days, 12:52:00
158 days, 10:55:00	76 days, 10:06:00	20:40:00	BDL	1 day, 2:26:00	8 days, 5:09:00	BDL	04:14:00	BDL	BDL	BDL	00:50:00	00:07:00	00:53:00	00:11:00	ULdi1	EDJ1	buccal	-4 days, 12:43:00
158 days, 18:21:00	75 days, 5:16:00	BDL	BDL	1 day, 5:13:00	7 days, 21:05:00	BDL	05:15:00	BDL	BDL	BDL	00:49:00	00:08:00	00:51:00	00:13:00	ULdi1	EDJ1	buccal	-4 days, 13:15:00
159 days, 2:28:00	74 days, 23:09:00	14:38:00	BDL	23:36:00	7 days, 23:09:00	BDL	04:42:00	BDL	BDL	BDL	00:49:00	00:06:00	00:52:00	00:12:00	ULdi1	EDJ1	buccal	-4 days, 13:47:00
159 days, 9:54:00	76 days, 17:04:00	BDL	BDL	23:19:00	8 days, 0:49:00	BDL	05:23:00	BDL	BDL	BDL	00:50:00	00:06:00	00:52:00	00:13:00	ULdi1	EDJ1	buccal	-4 days, 13:39:00
159 days, 17:21:00	76 days, 0:41:00	BDL	BDL	1 day, 9:12:00	8 days, 1:35:00	BDL	05:28:00	BDL	BDL	BDL	00:49:00	00:09:00	00:52:00	00:13:00	ULdi1	EDJ1	buccal	-4 days, 14:11:00
160 days, 1:28:00	76 days, 4:27:00	15:19:00	BDL	23:27:00	7 days, 20:21:00	BDL	05:49:00	BDL	BDL	BDL	00:49:00	00:06:00	00:51:00	00:15:00	ULdi1	EDJ1	buccal	-4 days, 14:44:00
160 days, 8:54:00	74 days, 9:07:00	BDL	BDL	23:49:00	7 days, 22:08:00	BDL	05:07:00	BDL	BDL	BDL	00:48:00	00:06:00	00:51:00	00:14:00	ULdi1	EDJ1	buccal	-4 days, 14:36:00
160 days, 16:22:00	76 days, 5:10:00	15:55:00	BDL	1 day, 5:06:00	8 days, 2:27:00	BDL	05:07:00	BDL	BDL	BDL	00:49:00	00:08:00	00:52:00	00:14:00	ULdi1	EDJ1	buccal	-4 days, 15:08:00
161 days, 0:28:00	77 days, 13:23:00	14:43:00	BDL	1 day, 7:20:00	7 days, 21:04:00	BDL	05:29:00	BDL	BDL	BDL	00:50:00	00:08:00	00:51:00	00:13:00	ULdi1	EDJ1	buccal	-4 days, 15:41:00
161 days, 7:55:00	77 days, 6:28:00	BDL	BDL	21:53:00	8 days, 4:06:00	BDL	05:12:00	BDL	BDL	BDL	00:50:00	00:06:00	00:53:00	00:14:00	ULdi1	EDJ1	buccal	-4 days, 15:33:00
161 days, 15:21:00	79 days, 15:28:00	17:37:00	BDL	1 day, 8:48:00	8 days, 2:48:00	BDL	06:02:00	BDL	BDL	BDL	00:52:00	00:09:00	00:53:00	00:15:00	ULdi1	EDJ1	buccal	-4 days, 16:06:00
161 days, 23:28:00	75 days, 19:46:00	BDL	BDL	1 day, 11:24:00	7 days, 19:25:00	BDL	05:23:00	BDL	00:13:00	BDL	00:49:00	00:09:00	00:50:00	00:13:00	ULdi1	EDJ1	buccal	-4 days, 16:38:00
162 days, 6:54:00	78 days, 5:32:00	1 day, 1:11:00	BDL	1 day, 2:54:00	7 days, 19:05:00	BDL	04:28:00	BDL	BDL	BDL	00:51:00	00:07:00	00:51:00	00:12:00	ULdi1	EDJ1	buccal	-4 days, 16:31:00
162 days, 14:21:00	76 days, 8:17:00	BDL	BDL	23:39:00	7 days, 16:09:00	BDL	05:21:00	BDL	BDL	BDL	00:50:00	00:06:00	00:50:00	00:13:00	ULdi1	EDJ1	buccal	-4 days, 17:04:00
162 days, 22:28:00	76 days, 3:25:00	15:51:00	BDL	1 day, 0:47:00	7 days, 17:46:00	BDL	05:37:00	BDL	BDL	BDL	00:49:00	00:07:00	00:50:00	00:13:00	ULdi1	EDJ1	buccal	-4 days, 17:36:00
163 days, 5:55:00	73 days, 14:34:00	15:55:00	BDL	1 day, 10:39:00	7 days, 18:29:00	BDL	05:02:00	BDL	BDL	BDL	00:48:00	00:09:00	00:50:00	00:12:00	ULdi1	EDJ1	buccal	-4 days, 17:29:00
163 days, 13:21:00	73 days, 17:50:00	16:28:00	BDL	1 day, 4:11:00	7 days, 12:21:00	BDL	05:05:00	BDL	BDL	BDL	00:48:00	00:07:00	00:49:00	00:14:00	ULdi1	EDJ1	buccal	-4 days, 18:02:00
163 days, 21:28:00	76 days, 0:24:00	14:57:00	BDL	1 day, 6:39:00	7 days, 18:26:00	BDL	05:06:00	BDL	BDL	BDL	00:49:00	00:08:00	00:50:00	00:13:00	ULdi1	EDJ1	buccal	-4 days, 18:35:00
164 days, 4:54:00	73 days, 16:05:00	BDL	BDL	1 day, 2:50:00	7 days, 18:14:00	BDL	05:13:00	BDL	00:09:00	BDL	00:48:00	00:07:00	00:50:00	00:14:00	ULdi1	EDJ1	buccal	-4 days, 18:27:00
164 days, 12:21:00	76 days, 10:47:00	BDL	BDL	1 day, 6:46:00	7 days, 20:39:00	BDL	05:30:00	BDL	BDL	00:01:00	00:50:00	00:08:00	00:51:00	00:14:00	ULdi1	EDJ1	buccal	-4 days, 19:00:00
164 days, 20:27:00	78 days, 7:02:00	17:25:00	BDL	1 day, 3:18:00	8 days, 3:13:00	BDL	06:52:00	BDL	BDL	00:01:00	00:51:00	00:07:00	00:53:00	00:18:00	ULdi1	EDJ1	buccal	-4 days, 19:33:00
165 days, 3:54:00	74 days, 13:17:00	14:31:00	BDL	1 day, 4:01:00	7 days, 22:41:00	BDL	07:15:00	BDL	BDL	00:12:00	00:48:00	00:07:00	00:51:00	00:19:00	ULdi1	EDJ1	buccal	-4 days, 19:26:00
165 days, 11:21:00	73 days, 23:20:00	18:17:00	BDL	1 day, 5:03:00	7 days, 19:21:00	BDL	08:28:00	BDL	BDL	00:23:00	00:48:00	00:08:00	00:51:00	00:22:00	ULdi1	EDJ1	buccal	-4 days, 19:59:00
165 days, 19:27:00	72 days, 22:24:00	1 day, 0:13:00	02:19:00	1 day, 4:12:00	7 days, 19:04:00	BDL	11:15:00	BDL	BDL	00:38:00	00:47:00	00:08:00	00:50:00	00:29:00	ULdi1	EDJ1	buccal	-4 days, 20:32:00
166 days, 2:54:00	75 days, 17:13:00	1 day, 9:39:00	02:28:00	1 day, 9:26:00	8 days, 6:45:00	BDL	13:08:00	BDL	BDL	01:02:00	00:49:00	00:09:00	00:54:00	00:34:00	ULdi1	EDJ1	buccal	-4 days, 20:25:00
166 days, 10:21:00	75 days, 0:51:00	1 day, 5:29:00	BDL	1 day, 9:58:00	8 days, 7:32:00	BDL	12:01:00	BDL	BDL	01:06:00	00:49:00	00:09:00	00:54:00	00:32:00	ULdi1	EDJ1	buccal	-4 days, 20:58:00
166 days, 18:28:00	77 days, 0:03:00	1 day, 5:23:00	03:33:00	1 day, 13:16:00	8 days, 10:02:00	BDL	14:28:00	BDL	00:12:00	01:03:00	00:50:00	00:10:00	00:54:00	00:38:00	ULdi1	EDJ1	buccal	-4 days, 21:31:00
167 days, 1:54:00	74 days, 16:51:00	1 day, 8:17:00	03:04:00	1 day, 8:05:00	8 days, 8:51:00	BDL	13:30:00	BDL	BDL	01:00:00	00:48:00	00:09:00	00:54:00	00:36:00	ULdi1	EDJ1	buccal	-4 days, 21:24:00
167 days, 9:21:00	72 days, 15:16:00	1 day, 11:02:00	04:18:00	1 day, 8:52:00	8 days, 9:55:00	BDL	14:32:00	BDL	00:16:00	01:20:00	00:47:00	00:09:00	00:54:00	00:38:00	ULdi1	EDJ1	buccal	-4 days, 21:58:00
167 days, 17:27:00	70 days, 22:17:00	1 day, 9:40:00	05:00:00	1 day, 16:33:00	8 days, 5:26:00	BDL	13:24:00	BDL	00:14:00	01:27:00	00:46:00	00:11:00	00:53:00	00:35:00	ULdi1	EDJ1	buccal	-4 days, 22:31:00
168 days, 0:54:00	70 days, 14:20:00	1 day, 12:12:00	07:16:00	1 day, 10:18:00	8 days, 9:04:00	BDL	15:01:00	BDL	00:08:00	01:15:00	00:46:00	00:09:00	00:54:00	00:39:00	ULdi1	EDJ1	buccal	-4 days, 22:24:00
168 days, 8:20:00	72 days, 5:24:00	1 day, 13:28:00	07:05:00	1 day, 11:40:00	8 days, 13:06:00	BDL	14:31:00	BDL	00:21:00	01:58:00	00:47:00	00:10:00	00:55:00	00:39:00	ULdi1	EDJ1	buccal	-4 days, 22:58:00
168 days, 16:28:00	68 days, 17:42:00	1 day, 7:16:00	07:10:00	1 day, 9:14:00	8 days, 7:06:00	BDL	15:26:00	BDL	00:15:00	01:29:00	00:45:00	00:09:00	00:54:00	00:40:00	ULdi1	EDJ1	buccal	-4 days, 23:31:00
168 days, 23:54:00	66 days, 16:11:00	1 day, 5:41:00	04:44:00	1 day, 8:45:00	8 days, 3:50:00	BDL	15:31:00	BDL	00:16:00	02:05:00	00:43:00	00:09:00	00:53:00	00:40:00	ULdi1	EDJ1	buccal	-4 days, 23:24:00
169 days, 7:21:00	70 days, 3:57:00	1 day, 12:27:00	02:27:00	1 day, 13:32:00	8 days, 9:34:00	BDL	15:07:00	BDL	00:22:00	01:54:00	00:46:00	00:10:00	00:54:00	00:40:00	ULdi1	EDJ1	buccal	-4 days, 23:58:00
169 days, 15:27:00	70 days, 4:00:00	1 day, 16:29:00	04:05:00	1 day, 11:17:00	8 days, 8:22:00	BDL	15:33:00	BDL	00:08:00	02:05:00	00:46:00	00:09:00	00:54:00	00:41:00	ULdi1	EDJ1	buccal	-3 days, 0:31:00
169 days, 22:54:00	68 days, 12:44:00	1 day, 12:31:00	03:50:00	1 day, 13:29:00	8 days, 11:14:00	BDL	16:09:00	BDL	00:09:00	02:18:00	00:44:00	00:10:00	00:55:00	00:43:00	ULdi1	EDJ1	buccal	-3 days, 0:25:00
170 days, 6:20:00	70 days, 6:27:00	1 day, 11:20:00	03:43:00	1 day, 12:44:00	8 days, 14:03:00	BDL	17:40:00	BDL	00:12:00	02:19:00	00:46:00	00:10:00	00:56:00	00:47:00	ULdi1	EDJ1	buccal	-3 days, 0:58:00
170 days, 14:27:00	69 days, 9:10:00	1 day, 3:53:00	03:34:00	1 day, 12:57:00	8 days, 8:01:00	BDL	16:29:00	BDL	00:18:00	02:14:00	00:45:00	00:10:00	00:54:00	00:44:00	ULdi1	EDJ1	buccal	-3 days, 1:32:00
170 days, 21:54:00	69 days, 8:19:00	1 day, 12:34:00	03:23:00	1 day, 7:08:00	8 days, 13:04:00	BDL	18:31:00	BDL	00:10:00	02:13:00	00:45:00	00:08:00	00:55:00	00:48:00	ULdi1	EDJ1	buccal	-3 days, 1:26:00
171 days, 5:21:00	68 days, 9:30:00	1 day, 11:46:00	04:03:00	1 day, 23:47:00	8 days, 8:11:00	BDL	17:14:00	BDL	00:11:00	02:02:00	00:44:00	00:13:00	00:54:00	00:45:00	ULdi1	EDJ1	buccal	-3 days, 1:59:00
171 days, 13:27:00	68 days, 16:22:00	1 day, 14:16:00	02:54:00	1 day, 18:36:00	8 days, 9:24:00	BDL	18:10:00	BDL	00:12:00	02:35:00	00:45:00	00:11:00	00:54:00	00:48:00	ULdi1	EDJ1	buccal	-3 days, 2:33:00
171 days, 20:54:00	67 days, 10:01:00	1 day, 11:39:00	02:06:00	1 day, 14:57:00	8 days, 7:51:00	BDL	16:34:00	BDL	BDL	02:14:00	00:44:00	00:10:00	00:54:00	00:44:00	ULdi1	EDJ1	buccal	-3 days, 2:27:00
172 days, 4:20:00	70 days, 20:42:00	1 day, 9:24:00	02:33:00	1 day, 8:51:00	8 days, 9:57:00	BDL	16:29:00	BDL	00:21:00	02:19:00	00:46:00	00:09:00	00:54:00	00:44:00	ULdi1	EDJ1	buccal	-3 days, 3:01:00
172 days, 12:27:00	71 days, 17:55:00	1 day, 6:53:00	02:14:00	1 day, 22:22:00	8 days, 14:05:00	BDL	17:01:00	BDL	00:16:00	02:14:00	00:47:00	00:12:00	00:56:00	00:45:00	ULdi1	EDJ1	buccal	-3 days, 3:34:00
172 days, 19:53:00	66 days, 16:30:00	1 day, 10:29:00	03:23:00	1 day, 15:34:00	8 days, 9:53:00	BDL	17:13:00	BDL	00:25:00	02:18:00	00:43:00	00:11:00	00:54:00	00:46:00	ULdi1	EDJ1	buccal	-3 days, 3:28:00
173 days, 3:20:00	69 days, 11:25:00	1 day, 8:01:00	03:39:00	1 day, 15:33:00	8 days, 12:48:00	BDL	16:52:00	BDL	00:13:00	02:02:00	00:45:00	00:11:00	00:55:00	00:45:00	ULdi1	EDJ1	buccal	-3 days, 4:02:00
173 days, 11:27:00	70 days, 19:17:00	1 day, 10:58:00	02:00:00	1 day, 20:40:00	8 days, 8:49:00	BDL	18:30:00	BDL	BDL	02:39:00	00:46:00	00:12:00	00:54:00	00:48:00	ULdi1	EDJ1	buccal	-3 days, 4:36:00
173 days, 18:53:00	68 days, 3:25:00	1 day, 4:45:00	02:51:00	2 days, 3:17:00	8 days, 11:05:00	BDL	17:23:00	BDL	00:18:00	02:28:00	00:44:00	00:14:00	00:55:00	00:45:00	ULdi1	EDJ1	buccal	-3 days, 4:30:00
174 days, 2:21:00	66 days, 2:25:00	1 day, 12:31:00	02:14:00	1 day, 22:02:00	8 days, 17:11:00	BDL	17:00:00	BDL	BDL	02:12:00	00:43:00	00:12:00	00:57:00	00:45:00	ULdi1	EDJ1	buccal	-3 days, 5:04:00
174 days, 10:27:00	68 days, 16:33:00	1 day, 8:31:00	03:06:00	1 day, 11:28:00	8 days, 6:01:00	BDL	17:44:00	BDL	00:10:00	02:22:00	00:45:00	00:10:00	00:54:00	00:47:00	ULdi1	EDJ1	buccal	-3 days, 5:39:00
174 days, 17:54:00	69 days, 4:38:00	1 day, 10:13:00	02:17:00	1 day, 8:30:00	8 days, 14:32:00	BDL	17:08:00	BDL	BDL	02:08:00	00:45:00	00:09:00	00:56:00	00:45:00	ULdi1	EDJ1	buccal	-3 days, 5:33:00
175 days, 1:20:00	69 days, 18:48:00	1 day, 8:56:00	02:36:00	1 day, 4:26:00	8 days, 12:21:00	BDL	18:12:00	BDL	00:08:00	02:23:00	00:45:00	00:08:00	00:55:00	00:48:00	ULdi1	EDJ1	buccal	-3 days, 6:07:00
175 days, 9:27:00	66 days, 21:02:00	1 day, 6:02:00	02:14:00	1 day, 7:23:00	8 days, 11:22:00	BDL	17:10:00	BDL	BDL	02:03:00	00:43:00	00:08:00	00:55:00	00:46:00	ULdi1	EDJ1	buccal	-3 days, 6:41:00
175 days, 16:53:00	68 days, 4:10:00	1 day, 9:38:00	BDL	1 day, 0:05:00	8 days, 10:29:00	BDL	18:03:00	BDL	BDL	02:04:00	00:44:00	00:06:00	00:55:00	00:49:00	ULdi1	EDJ1	buccal	-3 days, 6:35:00
176 days, 0:20:00	69 days, 9:55:00	1 day, 12:13:00	BDL	1 day, 5:26:00	8 days, 16:08:00	BDL	17:34:00	BDL	BDL	02:17:00	00:45:00	00:08:00	00:56:00	00:47:00	ULdi1	EDJ1	buccal	-3 days, 7:10:00
176 days, 8:27:00	70 days, 9:31:00	1 day, 5:15:00	BDL	1 day, 12:16:00	8 days, 13:02:00	BDL	18:14:00	BDL	00:08:00	02:40:00	00:46:00	00:10:00	00:55:00	00:48:00	ULdi1	EDJ1	buccal	-3 days, 7:44:00
176 days, 15:54:00	69 days, 12:34:00	1 day, 2:10:00	BDL	1 day, 10:30:00	8 days, 11:55:00	BDL	16:41:00	BDL	BDL	02:11:00	00:45:00	00:09:00	00:55:00	00:44:00	ULdi1	EDJ1	buccal	-3 days, 7:39:00
176 days, 23:20:00	73 days, 11:18:00	1 day, 11:00:00	02:58:00	1 day, 8:04:00	8 days, 16:54:00	BDL	19:25:00	BDL	BDL	02:09:00	00:48:00	00:09:00	00:56:00	00:51:00	ULdi1	EDJ1	buccal	-3 days, 8:13:00
177 days, 7:27:00	70 days, 19:55:00	1 day, 9:22:00	02:24:00	1 day, 12:10:00	8 days, 14:59:00	BDL	17:20:00	BDL	BDL	01:54:00	00:46:00	00:10:00	00:56:00	00:46:00	ULdi1	EDJ1	buccal	-3 days, 8:48:00
177 days, 14:53:00	69 days, 17:03:00	1 day, 12:07:00	BDL	1 day, 9:34:00	8 days, 12:01:00	BDL	17:01:00	BDL	BDL	02:11:00	00:45:00	00:09:00	00:55:00	00:45:00	ULdi1	EDJ1	buccal	-3 days, 8:42:00
177 days, 22:20:00	68 days, 20:43:00	1 day, 6:51:00	BDL	1 day, 14:38:00	8 days, 6:17:00	BDL	16:39:00	BDL	00:09:00	02:32:00	00:45:00	00:10:00	00:54:00	00:44:00	ULdi1	EDJ1	buccal	-3 days, 9:17:00
178 days, 6:26:00	67 days, 5:53:00	1 day, 8:14:00	BDL	1 day, 6:32:00	8 days, 13:43:00	BDL	16:19:00	BDL	BDL	02:13:00	00:44:00	00:08:00	00:56:00	00:44:00	ULdi1	EDJ1	buccal	-3 days, 9:52:00
178 days, 13:53:00	70 days, 19:24:00	1 day, 5:56:00	BDL	1 day, 10:31:00	8 days, 10:40:00	BDL	16:49:00	BDL	00:08:00	02:01:00	00:46:00	00:09:00	00:55:00	00:45:00	ULdi1	EDJ1	buccal	-3 days, 9:46:00
178 days, 21:20:00	68 days, 20:14:00	1 day, 5:02:00	03:00:00	1 day, 7:21:00	8 days, 12:38:00	BDL	17:12:00	BDL	BDL	02:08:00	00:45:00	00:08:00	00:55:00	00:45:00	ULdi1	EDJ1	buccal	-3 days, 10:21:00
179 days, 5:26:00	64 days, 23:03:00	1 day, 8:10:00	02:39:00	1 day, 13:25:00	8 days, 11:23:00	BDL	16:24:00	BDL	BDL	02:14:00	00:42:00	00:10:00	00:55:00	00:44:00	ULdi1	EDJ1	buccal	-3 days, 10:56:00
179 days, 12:53:00	67 days, 17:13:00	1 day, 4:39:00	02:14:00	1 day, 5:15:00	8 days, 11:02:00	BDL	16:14:00	BDL	BDL	02:06:00	00:44:00	00:08:00	00:55:00	00:44:00	ULdi1	EDJ1	buccal	-3 days, 10:51:00
179 days, 20:20:00	68 days, 17:51:00	1 day, 6:05:00	BDL	1 day, 10:46:00	8 days, 15:29:00	BDL	16:19:00	BDL	BDL	02:17:00	00:45:00	00:09:00	00:56:00	00:44:00	ULdi1	EDJ1	buccal	-3 days, 11:26:00
180 days, 4:27:00	69 days, 19:50:00	1 day, 6:14:00	BDL	1 day, 10:19:00	8 days, 13:26:00	BDL	17:17:00	BDL	00:13:00	02:22:00	00:45:00	00:09:00	00:55:00	00:45:00	ULdi1	EDJ1	buccal	-3 days, 11:21:00
180 days, 11:53:00	67 days, 12:30:00	1 day, 6:36:00	BDL	1 day, 6:30:00	8 days, 7:30:00	BDL	17:05:00	BDL	00:08:00	02:05:00	00:44:00	00:08:00	00:54:00	00:45:00	ULdi1	EDJ1	buccal	-3 days, 11:56:00
180 days, 19:20:00	69 days, 8:27:00	1 day, 6:02:00	BDL	1 day, 13:25:00	8 days, 15:47:00	BDL	16:59:00	BDL	00:14:00	02:29:00	00:45:00	00:10:00	00:56:00	00:45:00	ULdi1	EDJ1	buccal	-3 days, 12:31:00
181 days, 3:26:00	67 days, 7:37:00	1 day, 1:05:00	BDL	1 day, 6:25:00	8 days, 12:06:00	BDL	15:19:00	BDL	BDL	01:37:00	00:44:00	00:08:00	00:55:00	00:41:00	ULdi1	EDJ1	buccal	-3 days, 12:26:00
181 days, 10:53:00	68 days, 18:40:00	1 day, 1:33:00	02:35:00	1 day, 8:26:00	8 days, 10:24:00	BDL	16:33:00	BDL	BDL	02:00:00	00:45:00	00:09:00	00:55:00	00:44:00	ULdi1	EDJ1	buccal	-3 days, 13:01:00
181 days, 18:19:00	66 days, 1:02:00	1 day, 12:18:00	02:19:00	1 day, 12:30:00	8 days, 15:33:00	BDL	15:07:00	BDL	BDL	02:17:00	00:43:00	00:10:00	00:56:00	00:41:00	ULdi1	EDJ1	buccal	-3 days, 13:37:00
182 days, 2:27:00	66 days, 3:07:00	1 day, 5:36:00	BDL	1 day, 14:55:00	8 days, 15:44:00	BDL	16:27:00	BDL	BDL	02:03:00	00:43:00	00:10:00	00:56:00	00:44:00	ULdi1	EDJ1	buccal	-3 days, 13:32:00
182 days, 9:53:00	66 days, 10:24:00	1 day, 10:23:00	02:19:00	1 day, 10:09:00	8 days, 13:51:00	BDL	16:00:00	BDL	BDL	02:14:00	00:43:00	00:09:00	00:56:00	00:43:00	ULdi1	EDJ1	buccal	-3 days, 14:07:00
182 days, 17:20:00	66 days, 2:40:00	1 day, 8:19:00	BDL	1 day, 12:22:00	8 days, 11:12:00	BDL	14:58:00	BDL	00:11:00	01:48:00	00:43:00	00:10:00	00:55:00	00:39:00	ULdi1	EDJ1	buccal	-3 days, 14:43:00
183 days, 1:26:00	67 days, 7:33:00	1 day, 3:26:00	BDL	1 day, 10:16:00	8 days, 21:37:00	BDL	16:05:00	BDL	BDL	02:11:00	00:44:00	00:09:00	00:58:00	00:42:00	ULdi1	EDJ1	buccal	-3 days, 14:38:00
183 days, 8:53:00	67 days, 4:05:00	1 day, 12:15:00	BDL	1 day, 11:34:00	8 days, 21:20:00	BDL	16:25:00	BDL	BDL	02:27:00	00:44:00	00:10:00	00:58:00	00:43:00	ULdi1	EDJ1	buccal	-3 days, 15:14:00
183 days, 16:19:00	67 days, 21:08:00	1 day, 7:19:00	BDL	1 day, 8:31:00	8 days, 11:41:00	BDL	16:07:00	BDL	00:17:00	02:10:00	00:44:00	00:09:00	00:55:00	00:42:00	ULdi1	EDJ1	buccal	-3 days, 15:49:00
184 days, 0:26:00	65 days, 18:20:00	1 day, 8:04:00	BDL	1 day, 7:59:00	8 days, 13:57:00	BDL	16:11:00	BDL	00:08:00	02:04:00	00:43:00	00:09:00	00:56:00	00:42:00	ULdi1	EDJ1	buccal	-3 days, 15:45:00
184 days, 7:53:00	66 days, 0:03:00	1 day, 13:14:00	BDL	1 day, 8:25:00	8 days, 12:10:00	BDL	16:45:00	BDL	BDL	01:48:00	00:43:00	00:09:00	00:55:00	00:44:00	ULdi1	EDJ1	buccal	-3 days, 16:20:00
184 days, 15:20:00	67 days, 3:46:00	1 day, 6:11:00	BDL	1 day, 14:13:00	8 days, 13:13:00	BDL	16:44:00	BDL	BDL	02:12:00	00:44:00	00:10:00	00:55:00	00:44:00	ULdi1	EDJ1	buccal	-3 days, 16:56:00
184 days, 23:26:00	66 days, 1:08:00	1 day, 3:35:00	BDL	1 day, 9:19:00	8 days, 11:48:00	BDL	17:15:00	BDL	BDL	01:53:00	00:43:00	00:09:00	00:55:00	00:45:00	ULdi1	EDJ1	buccal	-3 days, 16:52:00
185 days, 6:53:00	65 days, 23:48:00	1 day, 7:41:00	BDL	1 day, 7:23:00	8 days, 15:05:00	BDL	16:29:00	BDL	BDL	01:51:00	00:43:00	00:08:00	00:56:00	00:44:00	ULdi1	EDJ1	buccal	-3 days, 17:28:00
185 days, 14:19:00	65 days, 10:39:00	1 day, 6:04:00	BDL	1 day, 2:26:00	8 days, 14:16:00	BDL	17:14:00	BDL	00:12:00	01:39:00	00:42:00	00:07:00	00:56:00	00:45:00	ULdi1	EDJ1	buccal	-3 days, 17:24:00
185 days, 22:26:00	66 days, 23:30:00	1 day, 6:21:00	BDL	1 day, 6:24:00	8 days, 20:47:00	BDL	17:21:00	BDL	00:14:00	01:53:00	00:43:00	00:08:00	00:57:00	00:47:00	ULdi1	EDJ1	buccal	-3 days, 18:00:00
186 days, 5:52:00	68 days, 1:03:00	1 day, 5:06:00	BDL	1 day, 8:55:00	8 days, 17:03:00	BDL	17:01:00	BDL	BDL	01:45:00	00:44:00	00:09:00	00:56:00	00:46:00	ULdi1	EDJ1	buccal	-3 days, 18:36:00
186 days, 13:19:00	66 days, 5:06:00	1 day, 10:30:00	BDL	1 day, 7:05:00	8 days, 18:03:00	BDL	17:44:00	BDL	BDL	01:43:00	00:43:00	00:08:00	00:57:00	00:47:00	ULdi1	EDJ1	buccal	-3 days, 18:32:00
186 days, 21:26:00	66 days, 0:25:00	1 day, 6:50:00	BDL	1 day, 11:08:00	8 days, 8:57:00	BDL	16:26:00	BDL	BDL	02:06:00	00:43:00	00:09:00	00:54:00	00:44:00	ULdi1	EDJ1	buccal	-3 days, 19:08:00
187 days, 4:52:00	69 days, 3:38:00	1 day, 11:11:00	BDL	1 day, 15:19:00	8 days, 23:17:00	BDL	17:31:00	BDL	00:12:00	02:16:00	00:45:00	00:11:00	00:58:00	00:47:00	ULdi1	EDJ1	buccal	-3 days, 19:44:00
187 days, 12:20:00	68 days, 0:37:00	1 day, 6:15:00	BDL	1 day, 2:44:00	8 days, 21:20:00	BDL	17:41:00	BDL	00:22:00	02:25:00	00:44:00	00:07:00	00:58:00	00:47:00	ULdi1	EDJ1	buccal	-3 days, 19:40:00
187 days, 20:26:00	70 days, 5:54:00	1 day, 16:36:00	BDL	1 day, 7:37:00	8 days, 17:53:00	BDL	17:00:00	BDL	BDL	01:47:00	00:46:00	00:08:00	00:57:00	00:46:00	ULdi1	EDJ1	buccal	-3 days, 20:16:00
188 days, 3:53:00	69 days, 11:05:00	1 day, 11:29:00	BDL	1 day, 9:28:00	8 days, 13:22:00	BDL	17:50:00	BDL	BDL	02:17:00	00:45:00	00:09:00	00:55:00	00:47:00	ULdi1	EDJ1	buccal	-3 days, 20:53:00
188 days, 11:19:00	65 days, 6:15:00	1 day, 2:10:00	BDL	1 day, 16:22:00	8 days, 15:07:00	BDL	17:25:00	BDL	00:10:00	02:27:00	00:42:00	00:11:00	00:56:00	00:47:00	ULdi1	EDJ1	buccal	-3 days, 20:49:00
188 days, 19:26:00	67 days, 10:45:00	1 day, 5:19:00	BDL	1 day, 3:40:00	8 days, 18:41:00	BDL	17:08:00	BDL	BDL	01:38:00	00:44:00	00:07:00	00:57:00	00:45:00	ULdi1	EDJ1	buccal	-3 days, 21:26:00
189 days, 2:52:00	65 days, 12:39:00	1 day, 3:41:00	BDL	1 day, 7:05:00	8 days, 13:28:00	BDL	16:51:00	BDL	BDL	01:41:00	00:42:00	00:08:00	00:55:00	00:45:00	ULdi1	EDJ1	buccal	-3 days, 21:22:00
189 days, 10:19:00	68 days, 10:10:00	1 day, 4:08:00	02:32:00	1 day, 9:37:00	8 days, 23:17:00	BDL	16:33:00	BDL	BDL	02:18:00	00:44:00	00:09:00	00:58:00	00:44:00	ULdi1	EDJ1	buccal	-3 days, 21:59:00
189 days, 18:26:00	66 days, 21:37:00	1 day, 15:09:00	02:27:00	1 day, 4:07:00	8 days, 20:21:00	BDL	16:09:00	BDL	BDL	02:10:00	00:43:00	00:08:00	00:57:00	00:43:00	ULdi1	EDJ1	buccal	-3 days, 22:35:00
190 days, 1:53:00	71 days, 18:21:00	1 day, 11:14:00	02:18:00	1 day, 3:14:00	8 days, 21:35:00	BDL	16:58:00	BDL	00:10:00	01:22:00	00:47:00	00:07:00	00:58:00	00:45:00	ULdi1	EDJ1	buccal	-3 days, 22:32:00
190 days, 9:19:00	67 days, 5:04:00	1 day, 7:25:00	BDL	1 day, 12:11:00	9 days, 1:17:00	BDL	17:00:00	BDL	BDL	01:37:00	00:44:00	00:10:00	00:59:00	00:45:00	ULdi1	EDJ1	buccal	-3 days, 23:09:00
190 days, 17:26:00	69 days, 22:01:00	1 day, 7:07:00	BDL	1 day, 9:52:00	9 days, 0:45:00	BDL	17:53:00	BDL	00:08:00	01:40:00	00:45:00	00:09:00	00:58:00	00:47:00	ULdi1	EDJ1	buccal	-3 days, 23:46:00
191 days, 0:52:00	65 days, 9:19:00	1 day, 7:29:00	BDL	1 day, 6:23:00	8 days, 21:13:00	BDL	17:04:00	BDL	BDL	01:54:00	00:42:00	00:08:00	00:58:00	00:46:00	ULdi1	EDJ1	buccal	-3 days, 23:43:00
191 days, 8:19:00	65 days, 18:28:00	1 day, 2:10:00	BDL	1 day, 13:13:00	8 days, 17:19:00	BDL	16:12:00	BDL	BDL	01:29:00	00:43:00	00:10:00	00:57:00	00:44:00	ULdi1	EDJ1	buccal	-2 days, 0:19:00
191 days, 16:25:00	67 days, 13:29:00	1 day, 1:07:00	02:26:00	1 day, 6:05:00	8 days, 17:22:00	BDL	17:09:00	BDL	00:12:00	01:40:00	00:44:00	00:08:00	00:56:00	00:46:00	ULdi1	EDJ1	buccal	-2 days, 0:56:00
191 days, 23:52:00	70 days, 4:10:00	1 day, 8:49:00	02:27:00	1 day, 11:37:00	8 days, 18:32:00	BDL	17:44:00	BDL	00:14:00	01:31:00	00:46:00	00:09:00	00:57:00	00:47:00	ULdi1	EDJ1	buccal	-2 days, 0:54:00
192 days, 7:19:00	64 days, 15:25:00	1 day, 4:21:00	02:34:00	1 day, 2:18:00	8 days, 15:27:00	BDL	16:27:00	BDL	00:10:00	01:59:00	00:42:00	00:07:00	00:56:00	00:44:00	ULdi1	EDJ1	buccal	-2 days, 1:31:00
192 days, 15:25:00	68 days, 11:06:00	1 day, 7:26:00	BDL	1 day, 4:11:00	8 days, 18:00:00	BDL	17:01:00	BDL	BDL	01:28:00	00:44:00	00:08:00	00:57:00	00:46:00	ULdi1	EDJ1	buccal	-2 days, 1:28:00
192 days, 22:52:00	69 days, 10:25:00	1 day, 6:32:00	BDL	1 day, 2:50:00	8 days, 16:51:00	BDL	16:10:00	BDL	BDL	01:34:00	00:45:00	00:07:00	00:56:00	00:42:00	ULdi1	EDJ1	buccal	-2 days, 2:05:00
193 days, 6:19:00	72 days, 5:33:00	1 day, 9:29:00	02:19:00	1 day, 2:53:00	8 days, 22:33:00	BDL	17:23:00	BDL	00:08:00	02:03:00	00:47:00	00:07:00	00:58:00	00:45:00	ULdi1	EDJ1	buccal	-2 days, 2:42:00
193 days, 14:26:00	65 days, 23:55:00	1 day, 12:22:00	BDL	1 day, 8:06:00	8 days, 18:56:00	BDL	18:07:00	BDL	BDL	01:59:00	00:43:00	00:09:00	00:57:00	00:49:00	ULdi1	EDJ1	buccal	-2 days, 2:40:00
193 days, 21:52:00	68 days, 5:05:00	1 day, 11:23:00	BDL	1 day, 12:08:00	9 days, 0:08:00	BDL	17:01:00	BDL	BDL	01:32:00	00:44:00	00:10:00	00:58:00	00:45:00	ULdi1	EDJ1	buccal	-2 days, 3:17:00
194 days, 5:19:00	71 days, 6:23:00	1 day, 8:19:00	BDL	1 day, 14:10:00	8 days, 15:01:00	BDL	16:40:00	BDL	BDL	01:15:00	00:46:00	00:10:00	00:56:00	00:44:00	ULdi1	EDJ1	buccal	-2 days, 3:55:00
194 days, 13:25:00	69 days, 10:34:00	1 day, 13:08:00	02:12:00	1 day, 10:25:00	8 days, 15:34:00	BDL	17:09:00	BDL	00:09:00	01:09:00	00:45:00	00:09:00	00:56:00	00:46:00	ULdi1	EDJ1	buccal	-2 days, 3:52:00
194 days, 20:52:00	69 days, 23:21:00	1 day, 1:24:00	BDL	1 day, 3:20:00	8 days, 23:20:00	BDL	16:49:00	BDL	BDL	01:31:00	00:45:00	00:07:00	00:58:00	00:45:00	ULdi1	EDJ1	buccal	-2 days, 4:30:00
195 days, 4:18:00	68 days, 5:09:00	1 day, 7:46:00	02:35:00	1 day, 10:06:00	8 days, 21:06:00	BDL	17:32:00	BDL	BDL	01:16:00	00:44:00	00:09:00	00:57:00	00:46:00	ULdi1	EDJ1	buccal	-2 days, 4:27:00
195 days, 12:26:00	71 days, 0:45:00	1 day, 5:23:00	BDL	1 day, 6:08:00	8 days, 17:25:00	BDL	16:05:00	BDL	BDL	01:25:00	00:46:00	00:08:00	00:57:00	00:42:00	ULdi1	EDJ1	buccal	-2 days, 5:05:00
195 days, 19:52:00	69 days, 4:27:00	22:27:00	02:09:00	1 day, 6:16:00	9 days, 6:10:00	BDL	16:00:00	BDL	BDL	01:01:00	00:45:00	00:08:00	01:00:00	00:43:00	ULdi1	EDJ1	buccal	-2 days, 5:43:00
196 days, 3:19:00	69 days, 8:59:00	1 day, 7:16:00	BDL	1 day, 9:37:00	8 days, 16:35:00	BDL	16:40:00	BDL	00:08:00	01:08:00	00:45:00	00:09:00	00:56:00	00:44:00	ULdi1	EDJ1	buccal	-2 days, 5:41:00
196 days, 11:25:00	71 days, 16:27:00	1 day, 4:04:00	BDL	1 day, 6:43:00	8 days, 18:54:00	BDL	15:40:00	BDL	BDL	01:28:00	00:46:00	00:08:00	00:57:00	00:42:00	ULdi1	EDJ1	buccal	-2 days, 6:19:00
196 days, 18:52:00	69 days, 7:02:00	1 day, 5:33:00	BDL	1 day, 2:30:00	8 days, 16:28:00	BDL	15:43:00	BDL	BDL	01:29:00	00:45:00	00:07:00	00:56:00	00:42:00	ULdi1	EDJ1	buccal	-2 days, 6:57:00
197 days, 2:18:00	69 days, 13:50:00	1 day, 1:04:00	02:23:00	1 day, 7:55:00	8 days, 22:43:00	BDL	16:29:00	BDL	BDL	01:09:00	00:45:00	00:09:00	00:58:00	00:43:00	ULdi1	EDJ1	buccal	-2 days, 6:55:00
197 days, 10:25:00	72 days, 5:06:00	1 day, 2:31:00	03:16:00	1 day, 1:06:00	8 days, 20:00:00	BDL	16:09:00	BDL	BDL	01:12:00	00:47:00	00:07:00	00:57:00	00:42:00	ULdi1	EDJ1	buccal	-2 days, 7:33:00
197 days, 17:52:00	70 days, 0:08:00	1 day, 1:07:00	02:24:00	1 day, 7:49:00	8 days, 17:19:00	BDL	17:02:00	BDL	BDL	01:06:00	00:45:00	00:09:00	00:57:00	00:46:00	ULdi1	EDJ1	buccal	-2 days, 7:31:00
198 days, 1:19:00	68 days, 10:02:00	22:11:00	BDL	1 day, 5:53:00	8 days, 15:16:00	BDL	15:14:00	BDL	BDL	01:00:00	00:44:00	00:08:00	00:56:00	00:40:00	ULdi1	EDJ1	buccal	-2 days, 8:10:00
198 days, 9:25:00	71 days, 5:42:00	1 day, 3:47:00	BDL	1 day, 4:00:00	8 days, 17:36:00	BDL	16:30:00	BDL	BDL	01:38:00	00:46:00	00:08:00	00:57:00	00:43:00	ULdi1	EDJ1	buccal	-2 days, 8:48:00
198 days, 16:52:00	69 days, 7:45:00	1 day, 0:21:00	BDL	23:19:00	8 days, 20:28:00	BDL	15:59:00	BDL	BDL	01:18:00	00:45:00	00:06:00	00:57:00	00:42:00	ULdi1	EDJ1	buccal	-2 days, 8:47:00
199 days, 0:18:00	70 days, 23:10:00	23:01:00	BDL	1 day, 3:00:00	8 days, 13:14:00	BDL	16:28:00	BDL	BDL	01:23:00	00:46:00	00:07:00	00:55:00	00:44:00	ULdi1	EDJ1	buccal	-2 days, 9:25:00
199 days, 8:25:00	70 days, 8:49:00	1 day, 1:03:00	BDL	1 day, 8:59:00	8 days, 14:15:00	BDL	16:27:00	BDL	00:09:00	01:20:00	00:46:00	00:09:00	00:56:00	00:44:00	ULdi1	EDJ1	buccal	-2 days, 9:24:00
199 days, 15:51:00	71 days, 4:16:00	23:26:00	BDL	1 day, 2:59:00	8 days, 11:26:00	BDL	17:35:00	BDL	BDL	01:11:00	00:46:00	00:07:00	00:55:00	00:46:00	ULdi1	EDJ1	buccal	-2 days, 10:03:00
199 days, 23:18:00	71 days, 6:22:00	16:01:00	02:38:00	21:53:00	8 days, 21:50:00	BDL	17:07:00	BDL	BDL	01:24:00	00:46:00	00:06:00	00:58:00	00:45:00	ULdi1	EDJ1	buccal	-2 days, 10:42:00
200 days, 7:25:00	70 days, 12:32:00	1 day, 4:18:00	BDL	1 day, 6:02:00	8 days, 17:25:00	BDL	16:05:00	BDL	BDL	01:37:00	00:46:00	00:08:00	00:57:00	00:42:00	ULdi1	EDJ1	buccal	-2 days, 10:41:00
200 days, 14:51:00	69 days, 21:04:00	1 day, 4:06:00	BDL	23:19:00	8 days, 19:12:00	BDL	16:59:00	BDL	BDL	01:12:00	00:45:00	00:06:00	00:57:00	00:45:00	ULdi1	EDJ1	buccal	-2 days, 11:20:00
200 days, 22:19:00	72 days, 0:32:00	16:28:00	BDL	1 day, 1:52:00	8 days, 13:23:00	BDL	16:06:00	BDL	BDL	01:13:00	00:47:00	00:07:00	00:55:00	00:42:00	ULdi1	EDJ1	buccal	-2 days, 11:59:00
201 days, 6:25:00	71 days, 15:19:00	21:00:00	BDL	1 day, 5:25:00	8 days, 10:18:00	BDL	16:26:00	BDL	BDL	01:07:00	00:46:00	00:08:00	00:55:00	00:43:00	ULdi1	EDJ1	buccal	-2 days, 11:59:00
201 days, 13:52:00	75 days, 0:39:00	14:44:00	BDL	1 day, 8:54:00	8 days, 17:43:00	BDL	16:04:00	BDL	BDL	00:43:00	00:49:00	00:09:00	00:57:00	00:42:00	ULdi1	EDJ1	buccal	-2 days, 12:38:00
201 days, 21:18:00	75 days, 6:25:00	22:12:00	BDL	1 day, 5:37:00	8 days, 9:52:00	BDL	16:19:00	BDL	BDL	00:27:00	00:49:00	00:08:00	00:54:00	00:43:00	ULdi1	EDJ1	buccal	-2 days, 12:37:00
202 days, 5:25:00	71 days, 6:48:00	BDL	BDL	1 day, 2:14:00	8 days, 10:53:00	BDL	15:01:00	BDL	BDL	00:20:00	00:46:00	00:07:00	00:55:00	00:41:00	ULdi1	EDJ1	buccal	-2 days, 13:17:00
202 days, 12:51:00	72 days, 0:04:00	BDL	BDL	1 day, 9:52:00	8 days, 18:21:00	BDL	16:17:00	BDL	BDL	00:50:00	00:47:00	00:09:00	00:57:00	00:44:00	ULdi1	EDJ1	buccal	-2 days, 13:57:00
202 days, 20:18:00	68 days, 17:39:00	17:23:00	BDL	1 day, 1:56:00	8 days, 7:48:00	BDL	15:13:00	BDL	BDL	00:34:00	00:45:00	00:07:00	00:54:00	00:40:00	ULdi1	EDJ1	buccal	-2 days, 13:56:00
203 days, 4:25:00	76 days, 5:24:00	BDL	BDL	1 day, 1:57:00	8 days, 14:00:00	BDL	16:24:00	BDL	BDL	00:24:00	00:49:00	00:07:00	00:56:00	00:44:00	ULdi1	EDJ1	buccal	-2 days, 14:36:00
203 days, 11:52:00	72 days, 17:16:00	BDL	BDL	22:28:00	8 days, 17:22:00	BDL	14:03:00	BDL	BDL	00:14:00	00:47:00	00:06:00	00:57:00	00:37:00	ULdi1	EDJ1	buccal	-2 days, 14:36:00
203 days, 19:18:00	74 days, 8:30:00	16:45:00	BDL	1 day, 7:47:00	8 days, 12:08:00	BDL	13:39:00	BDL	00:10:00	00:06:00	00:48:00	00:09:00	00:55:00	00:36:00	ULdi1	EDJ1	buccal	-2 days, 15:15:00
204 days, 3:25:00	72 days, 7:03:00	BDL	BDL	1 day, 1:39:00	8 days, 7:16:00	BDL	12:37:00	BDL	BDL	00:03:00	00:47:00	00:07:00	00:54:00	00:33:00	ULdi1	EDJ1	buccal	-2 days, 15:55:00
204 days, 10:51:00	76 days, 3:01:00	17:46:00	BDL	1 day, 3:12:00	8 days, 10:23:00	BDL	12:22:00	BDL	BDL	00:08:00	00:49:00	00:07:00	00:55:00	00:33:00	ULdi1	EDJ1	buccal	-2 days, 15:55:00
204 days, 18:18:00	73 days, 7:23:00	BDL	BDL	1 day, 2:48:00	8 days, 11:05:00	BDL	12:11:00	BDL	BDL	00:09:00	00:48:00	00:07:00	00:55:00	00:32:00	ULdi1	EDJ1	buccal	-2 days, 16:35:00
205 days, 2:24:00	76 days, 3:22:00	BDL	BDL	1 day, 2:11:00	8 days, 3:18:00	BDL	13:17:00	BDL	BDL	00:18:00	00:49:00	00:07:00	00:53:00	00:36:00	ULdi1	EDJ1	buccal	-2 days, 16:35:00
205 days, 9:51:00	73 days, 15:27:00	BDL	BDL	1 day, 4:25:00	8 days, 7:26:00	BDL	13:17:00	BDL	BDL	00:26:00	00:48:00	00:08:00	00:54:00	00:36:00	ULdi1	EDJ1	buccal	-2 days, 17:15:00
205 days, 17:18:00	70 days, 6:08:00	BDL	BDL	1 day, 8:17:00	8 days, 14:09:00	BDL	14:00:00	BDL	BDL	00:32:00	00:46:00	00:09:00	00:56:00	00:38:00	ULdi1	EDJ1	buccal	-2 days, 17:55:00
206 days, 1:24:00	76 days, 9:54:00	14:06:00	BDL	1 day, 8:18:00	8 days, 10:00:00	BDL	14:36:00	BDL	00:08:00	00:38:00	00:50:00	00:09:00	00:54:00	00:39:00	ULdi1	EDJ1	buccal	-2 days, 17:56:00
206 days, 8:51:00	72 days, 20:22:00	16:57:00	BDL	1 day, 6:46:00	8 days, 5:38:00	BDL	14:37:00	BDL	BDL	00:50:00	00:47:00	00:08:00	00:53:00	00:38:00	ULdi1	EDJ1	buccal	-2 days, 18:36:00
206 days, 16:18:00	71 days, 8:47:00	BDL	BDL	1 day, 8:02:00	8 days, 8:23:00	BDL	14:39:00	BDL	BDL	00:51:00	00:46:00	00:09:00	00:54:00	00:39:00	ULdi1	EDJ1	buccal	-2 days, 18:36:00
207 days, 0:25:00	75 days, 3:44:00	18:13:00	BDL	1 day, 6:32:00	8 days, 2:12:00	BDL	14:13:00	BDL	BDL	00:36:00	00:49:00	00:08:00	00:52:00	00:37:00	ULdi1	EDJ1	buccal	-2 days, 19:16:00
207 days, 7:51:00	73 days, 10:18:00	20:29:00	BDL	1 day, 9:37:00	8 days, 2:29:00	BDL	14:43:00	BDL	BDL	00:54:00	00:48:00	00:09:00	00:53:00	00:39:00	ULdi1	EDJ1	buccal	-2 days, 19:56:00
207 days, 15:18:00	71 days, 16:24:00	15:47:00	BDL	1 day, 5:40:00	8 days, 3:32:00	BDL	15:08:00	BDL	BDL	00:44:00	00:46:00	00:08:00	00:53:00	00:40:00	ULdi1	EDJ1	buccal	-2 days, 19:57:00
207 days, 23:24:00	72 days, 3:26:00	19:38:00	BDL	1 day, 3:05:00	8 days, 5:07:00	BDL	16:10:00	BDL	BDL	00:55:00	00:47:00	00:07:00	00:53:00	00:44:00	ULdi1	EDJ1	buccal	-2 days, 20:37:00
208 days, 6:51:00	74 days, 18:00:00	23:23:00	BDL	1 day, 10:41:00	8 days, 15:07:00	BDL	17:04:00	BDL	BDL	01:11:00	00:48:00	00:09:00	00:56:00	00:45:00	ULdi1	EDJ1	buccal	-2 days, 20:37:00
208 days, 14:17:00	71 days, 18:24:00	1 day, 1:15:00	BDL	1 day, 5:44:00	8 days, 10:44:00	BDL	16:35:00	BDL	BDL	01:18:00	00:47:00	00:08:00	00:55:00	00:43:00	ULdi1	EDJ1	buccal	-2 days, 21:18:00
208 days, 22:25:00	74 days, 17:30:00	22:07:00	02:24:00	1 day, 6:38:00	8 days, 13:20:00	BDL	16:17:00	BDL	BDL	01:19:00	00:48:00	00:08:00	00:55:00	00:43:00	ULdi1	EDJ1	buccal	-2 days, 21:58:00
209 days, 5:51:00	72 days, 23:13:00	22:24:00	03:04:00	1 day, 12:06:00	8 days, 10:45:00	BDL	17:16:00	BDL	BDL	01:17:00	00:47:00	00:10:00	00:55:00	00:46:00	ULdi1	EDJ1	buccal	-2 days, 21:58:00
209 days, 13:18:00	72 days, 10:31:00	20:26:00	BDL	1 day, 9:50:00	8 days, 8:19:00	BDL	17:02:00	BDL	BDL	01:11:00	00:47:00	00:09:00	00:54:00	00:45:00	ULdi1	EDJ1	buccal	-2 days, 22:39:00
209 days, 21:24:00	72 days, 2:00:00	1 day, 1:33:00	BDL	1 day, 5:13:00	8 days, 13:32:00	BDL	17:09:00	BDL	BDL	01:09:00	00:47:00	00:08:00	00:55:00	00:46:00	ULdi1	EDJ1	buccal	-2 days, 22:39:00
210 days, 4:51:00	74 days, 12:16:00	22:35:00	BDL	1 day, 4:39:00	8 days, 10:31:00	BDL	17:52:00	BDL	BDL	01:33:00	00:48:00	00:08:00	00:55:00	00:47:00	ULdi1	EDJ1	buccal	-2 days, 23:20:00
210 days, 12:17:00	76 days, 0:20:00	1 day, 0:28:00	02:38:00	1 day, 2:38:00	8 days, 10:31:00	BDL	17:38:00	BDL	BDL	01:00:00	00:49:00	00:07:00	00:55:00	00:46:00	ULdi1	EDJ1	buccal	-1 day, 0:00:00
210 days, 20:24:00	72 days, 11:45:00	1 day, 6:12:00	BDL	1 day, 11:33:00	8 days, 9:29:00	BDL	17:19:00	BDL	BDL	01:58:00	00:47:00	00:09:00	00:54:00	00:45:00	ULdi1	EDJ1	buccal	-1 day, 0:00:00
211 days, 3:51:00	71 days, 9:59:00	22:21:00	BDL	1 day, 2:27:00	8 days, 10:09:00	BDL	17:12:00	BDL	BDL	01:29:00	00:46:00	00:07:00	00:55:00	00:45:00	ULdi1	EDJ1	buccal	-1 day, 0:41:00
211 days, 11:18:00	74 days, 11:10:00	1 day, 2:57:00	BDL	1 day, 14:12:00	8 days, 18:16:00	BDL	17:12:00	BDL	BDL	01:29:00	00:48:00	00:10:00	00:57:00	00:46:00	ULdi1	EDJ1	buccal	-1 day, 0:41:00
211 days, 19:24:00	72 days, 22:03:00	1 day, 0:43:00	BDL	1 day, 3:38:00	8 days, 10:23:00	BDL	17:43:00	BDL	BDL	01:13:00	00:47:00	00:07:00	00:55:00	00:47:00	ULdi1	EDJ1	buccal	-1 day, 1:22:00
212 days, 2:51:00	74 days, 20:22:00	20:36:00	BDL	1 day, 7:26:00	8 days, 12:38:00	BDL	17:43:00	BDL	00:09:00	01:20:00	00:49:00	00:08:00	00:55:00	00:47:00	ULdi1	EDJ1	buccal	-1 day, 1:22:00
212 days, 10:17:00	72 days, 17:31:00	1 day, 3:27:00	BDL	1 day, 3:16:00	8 days, 13:15:00	BDL	18:12:00	BDL	BDL	01:25:00	00:47:00	00:07:00	00:55:00	00:48:00	ULdi1	EDJ1	buccal	-1 day, 2:02:00
212 days, 18:24:00	71 days, 7:40:00	22:49:00	BDL	1 day, 4:23:00	8 days, 17:15:00	BDL	16:28:00	BDL	00:09:00	01:29:00	00:46:00	00:08:00	00:57:00	00:43:00	ULdi1	EDJ1	buccal	-1 day, 2:43:00
213 days, 1:50:00	73 days, 8:06:00	1 day, 2:54:00	BDL	1 day, 4:06:00	8 days, 10:37:00	BDL	16:19:00	BDL	00:11:00	01:36:00	00:48:00	00:08:00	00:55:00	00:43:00	ULdi1	EDJ1	buccal	-1 day, 2:43:00
213 days, 9:17:00	69 days, 14:38:00	1 day, 1:24:00	BDL	1 day, 8:01:00	8 days, 20:51:00	BDL	17:25:00	BDL	BDL	01:32:00	00:45:00	00:09:00	00:57:00	00:47:00	ULdi1	EDJ1	buccal	-1 day, 3:23:00
213 days, 17:24:00	72 days, 18:13:00	1 day, 5:02:00	BDL	1 day, 11:34:00	8 days, 17:38:00	BDL	17:07:00	BDL	00:12:00	01:10:00	00:47:00	00:10:00	00:56:00	00:45:00	ULdi1	EDJ1	buccal	-1 day, 3:23:00
214 days, 0:50:00	72 days, 22:34:00	23:26:00	BDL	1 day, 11:27:00	8 days, 23:16:00	BDL	16:34:00	BDL	00:12:00	01:34:00	00:47:00	00:09:00	00:58:00	00:44:00	ULdi1	EDJ1	buccal	-1 day, 4:04:00
214 days, 8:18:00	70 days, 14:25:00	1 day, 4:25:00	BDL	1 day, 9:28:00	8 days, 19:13:00	BDL	17:12:00	BDL	BDL	01:36:00	00:46:00	00:09:00	00:57:00	00:45:00	ULdi1	EDJ1	buccal	-1 day, 4:44:00
214 days, 16:24:00	70 days, 16:20:00	1 day, 0:06:00	BDL	1 day, 8:37:00	8 days, 10:19:00	BDL	17:13:00	BDL	00:09:00	01:06:00	00:46:00	00:09:00	00:55:00	00:45:00	ULdi1	EDJ1	buccal	-1 day, 4:44:00
214 days, 23:51:00	71 days, 6:04:00	22:00:00	02:11:00	1 day, 4:28:00	8 days, 15:51:00	BDL	16:21:00	BDL	00:13:00	01:08:00	00:46:00	00:08:00	00:56:00	00:44:00	ULdi1	EDJ1	buccal	-1 day, 5:24:00
215 days, 7:17:00	70 days, 18:27:00	18:10:00	BDL	1 day, 5:19:00	8 days, 17:26:00	BDL	18:11:00	BDL	BDL	01:17:00	00:46:00	00:08:00	00:57:00	00:48:00	ULdi1	EDJ1	buccal	-1 day, 5:24:00
215 days, 15:24:00	72 days, 5:28:00	1 day, 4:30:00	BDL	1 day, 8:14:00	9 days, 1:21:00	BDL	18:02:00	BDL	00:08:00	01:09:00	00:47:00	00:09:00	00:59:00	00:48:00	ULdi1	EDJ1	buccal	-1 day, 6:04:00
215 days, 22:50:00	72 days, 9:13:00	23:04:00	BDL	1 day, 12:20:00	8 days, 14:16:00	BDL	17:21:00	BDL	00:10:00	01:19:00	00:47:00	00:10:00	00:56:00	00:45:00	ULdi1	EDJ1	buccal	-1 day, 6:44:00
216 days, 6:17:00	69 days, 16:30:00	1 day, 2:39:00	BDL	18:42:00	8 days, 10:28:00	BDL	16:07:00	BDL	BDL	01:05:00	00:45:00	00:05:00	00:55:00	00:42:00	ULdi1	EDJ1	buccal	-1 day, 6:44:00
216 days, 14:24:00	70 days, 15:35:00	1 day, 0:34:00	BDL	1 day, 6:38:00	8 days, 14:13:00	BDL	15:32:00	BDL	BDL	01:30:00	00:46:00	00:08:00	00:56:00	00:41:00	ULdi1	EDJ1	buccal	-1 day, 7:24:00
216 days, 21:51:00	68 days, 1:16:00	1 day, 3:05:00	BDL	1 day, 7:09:00	8 days, 17:21:00	BDL	17:03:00	BDL	BDL	01:35:00	00:44:00	00:08:00	00:56:00	00:46:00	ULdi1	EDJ1	buccal	-1 day, 7:24:00
217 days, 5:17:00	68 days, 19:23:00	1 day, 3:02:00	BDL	1 day, 12:02:00	8 days, 19:37:00	BDL	16:16:00	BDL	00:12:00	01:37:00	00:45:00	00:10:00	00:57:00	00:44:00	ULdi1	EDJ1	buccal	-1 day, 8:04:00
217 days, 13:24:00	70 days, 15:23:00	1 day, 4:10:00	BDL	1 day, 14:15:00	8 days, 20:39:00	BDL	16:04:00	BDL	00:08:00	01:26:00	00:46:00	00:10:00	00:57:00	00:43:00	ULdi1	EDJ1	buccal	-1 day, 8:43:00
217 days, 20:50:00	67 days, 23:31:00	1 day, 4:32:00	BDL	1 day, 11:16:00	8 days, 15:17:00	BDL	15:27:00	BDL	BDL	01:36:00	00:44:00	00:09:00	00:56:00	00:41:00	ULdi1	EDJ1	buccal	-1 day, 8:43:00
218 days, 4:17:00	68 days, 20:46:00	1 day, 3:24:00	BDL	1 day, 4:45:00	9 days, 0:11:00	BDL	15:33:00	BDL	BDL	01:13:00	00:45:00	00:08:00	00:58:00	00:41:00	ULdi1	EDJ1	buccal	-1 day, 9:23:00
218 days, 12:23:00	72 days, 1:43:00	19:20:00	BDL	1 day, 17:35:00	8 days, 18:16:00	BDL	16:33:00	BDL	00:09:00	01:05:00	00:47:00	00:11:00	00:57:00	00:44:00	ULdi1	EDJ1	buccal	-1 day, 9:22:00
218 days, 19:50:00	72 days, 16:19:00	22:45:00	BDL	1 day, 8:28:00	8 days, 21:01:00	BDL	17:37:00	BDL	00:13:00	01:25:00	00:47:00	00:09:00	00:57:00	00:46:00	ULdi1	EDJ1	buccal	-1 day, 10:02:00
219 days, 3:17:00	68 days, 19:07:00	1 day, 2:50:00	BDL	1 day, 15:25:00	8 days, 20:13:00	BDL	16:33:00	BDL	BDL	01:24:00	00:45:00	00:11:00	00:57:00	00:44:00	ULdi1	EDJ1	buccal	-1 day, 10:41:00
219 days, 11:23:00	69 days, 20:26:00	1 day, 3:06:00	02:11:00	1 day, 6:33:00	8 days, 16:12:00	BDL	16:16:00	BDL	00:16:00	01:24:00	00:45:00	00:08:00	00:56:00	00:43:00	ULdi1	EDJ1	buccal	-1 day, 10:40:00
219 days, 18:50:00	69 days, 12:25:00	1 day, 3:33:00	BDL	1 day, 7:26:00	8 days, 21:26:00	BDL	17:24:00	BDL	BDL	01:27:00	00:45:00	00:08:00	00:58:00	00:46:00	ULdi1	EDJ1	buccal	-1 day, 11:20:00
220 days, 2:17:00	68 days, 23:55:00	23:03:00	BDL	1 day, 6:15:00	8 days, 18:12:00	BDL	16:27:00	BDL	00:09:00	01:29:00	00:45:00	00:08:00	00:57:00	00:44:00	ULdi1	EDJ1	buccal	-1 day, 11:59:00
220 days, 10:24:00	70 days, 0:20:00	1 day, 0:25:00	BDL	1 day, 16:19:00	8 days, 15:40:00	BDL	15:19:00	BDL	00:19:00	01:19:00	00:45:00	00:11:00	00:56:00	00:40:00	ULdi1	EDJ1	buccal	-1 day, 11:59:00
220 days, 17:50:00	70 days, 21:27:00	1 day, 2:17:00	02:14:00	1 day, 14:54:00	8 days, 22:28:00	BDL	16:52:00	BDL	00:29:00	01:07:00	00:46:00	00:10:00	00:58:00	00:45:00	ULdi1	EDJ1	buccal	-1 day, 12:38:00
221 days, 1:17:00	68 days, 8:27:00	22:37:00	BDL	1 day, 12:41:00	8 days, 17:37:00	BDL	16:30:00	BDL	00:11:00	01:17:00	00:44:00	00:10:00	00:57:00	00:44:00	ULdi1	EDJ1	buccal	-1 day, 12:38:00
221 days, 9:23:00	67 days, 4:16:00	1 day, 3:11:00	BDL	1 day, 12:23:00	8 days, 16:01:00	BDL	16:20:00	BDL	00:17:00	01:30:00	00:44:00	00:10:00	00:56:00	00:43:00	ULdi1	EDJ1	buccal	-1 day, 13:17:00
221 days, 16:50:00	66 days, 19:05:00	1 day, 4:19:00	02:03:00	1 day, 10:28:00	8 days, 11:46:00	BDL	16:02:00	BDL	00:14:00	01:34:00	00:43:00	00:09:00	00:55:00	00:42:00	ULdi1	EDJ1	buccal	-1 day, 13:57:00
222 days, 0:16:00	70 days, 3:57:00	1 day, 5:24:00	BDL	1 day, 16:17:00	8 days, 20:42:00	BDL	16:10:00	BDL	BDL	01:21:00	00:46:00	00:11:00	00:57:00	00:42:00	ULdi1	EDJ1	buccal	-1 day, 13:56:00
222 days, 8:24:00	68 days, 2:25:00	1 day, 4:09:00	BDL	1 day, 13:21:00	8 days, 13:35:00	BDL	16:20:00	BDL	BDL	01:12:00	00:44:00	00:10:00	00:55:00	00:43:00	ULdi1	EDJ1	buccal	-1 day, 14:36:00
222 days, 15:50:00	68 days, 3:11:00	1 day, 1:32:00	02:09:00	1 day, 12:50:00	8 days, 18:14:00	BDL	15:30:00	BDL	00:12:00	01:25:00	00:44:00	00:10:00	00:57:00	00:41:00	ULdi1	EDJ1	buccal	-1 day, 14:36:00
222 days, 23:17:00	70 days, 5:38:00	1 day, 0:08:00	BDL	1 day, 9:58:00	8 days, 16:05:00	BDL	15:27:00	BDL	00:14:00	01:03:00	00:46:00	00:09:00	00:56:00	00:40:00	ULdi1	EDJ1	buccal	-1 day, 15:16:00
223 days, 7:23:00	69 days, 2:26:00	23:01:00	BDL	1 day, 12:04:00	8 days, 23:00:00	BDL	17:16:00	BDL	BDL	01:07:00	00:45:00	00:10:00	00:58:00	00:45:00	ULdi1	EDJ1	buccal	-1 day, 15:55:00
223 days, 14:50:00	72 days, 18:46:00	1 day, 0:26:00	BDL	1 day, 6:18:00	8 days, 20:52:00	BDL	15:13:00	BDL	BDL	01:27:00	00:47:00	00:08:00	00:57:00	00:41:00	ULdi1	EDJ1	buccal	-1 day, 15:55:00
223 days, 22:16:00	68 days, 19:30:00	1 day, 0:39:00	BDL	1 day, 15:34:00	8 days, 18:47:00	BDL	15:27:00	BDL	BDL	01:01:00	00:45:00	00:11:00	00:57:00	00:40:00	ULdi1	EDJ1	buccal	-1 day, 16:35:00
224 days, 6:23:00	71 days, 12:25:00	1 day, 0:33:00	BDL	1 day, 8:29:00	8 days, 14:29:00	BDL	16:36:00	BDL	BDL	01:21:00	00:46:00	00:09:00	00:56:00	00:43:00	ULdi1	EDJ1	buccal	-1 day, 16:35:00
224 days, 13:50:00	69 days, 21:06:00	1 day, 2:12:00	BDL	1 day, 2:33:00	8 days, 20:26:00	BDL	15:26:00	BDL	00:11:00	01:11:00	00:45:00	00:07:00	00:57:00	00:40:00	ULdi1	EDJ1	buccal	-1 day, 17:15:00
224 days, 21:17:00	72 days, 11:28:00	23:28:00	BDL	1 day, 10:14:00	8 days, 22:16:00	BDL	16:12:00	BDL	00:12:00	01:14:00	00:47:00	00:09:00	00:58:00	00:44:00	ULdi1	EDJ1	buccal	-1 day, 17:55:00
225 days, 5:23:00	68 days, 23:29:00	1 day, 3:20:00	BDL	1 day, 17:12:00	8 days, 10:42:00	BDL	16:01:00	BDL	BDL	01:17:00	00:45:00	00:11:00	00:55:00	00:42:00	ULdi1	EDJ1	buccal	-1 day, 17:54:00
225 days, 12:50:00	72 days, 1:48:00	1 day, 3:22:00	BDL	1 day, 13:17:00	8 days, 12:31:00	BDL	15:12:00	00:07:00	BDL	01:03:00	00:47:00	00:10:00	00:55:00	00:41:00	ULdi1	EDJ1	buccal	-1 day, 18:34:00
225 days, 20:16:00	73 days, 3:00:00	21:22:00	02:07:00	1 day, 2:21:00	8 days, 21:37:00	BDL	17:03:00	BDL	BDL	01:12:00	00:47:00	00:07:00	00:58:00	00:45:00	ULdi1	EDJ1	buccal	-1 day, 18:34:00
226 days, 4:23:00	68 days, 21:22:00	22:15:00	BDL	1 day, 5:17:00	8 days, 14:07:00	BDL	16:03:00	BDL	00:11:00	01:08:00	00:45:00	00:08:00	00:56:00	00:42:00	ULdi1	EDJ1	buccal	-1 day, 19:14:00
226 days, 11:49:00	75 days, 12:28:00	1 day, 0:21:00	BDL	22:42:00	8 days, 21:41:00	BDL	16:22:00	BDL	00:08:00	01:05:00	00:49:00	00:06:00	00:58:00	00:44:00	ULdi1	EDJ1	buccal	-1 day, 19:55:00
226 days, 19:16:00	70 days, 7:20:00	22:17:00	BDL	1 day, 8:31:00	8 days, 17:36:00	BDL	16:51:00	BDL	BDL	01:39:00	00:46:00	00:09:00	00:57:00	00:45:00	ULdi1	EDJ1	buccal	-1 day, 19:55:00
227 days, 3:23:00	69 days, 6:16:00	1 day, 3:27:00	02:15:00	1 day, 1:40:00	8 days, 14:28:00	BDL	15:46:00	BDL	BDL	01:34:00	00:45:00	00:07:00	00:56:00	00:42:00	ULdi1	EDJ1	buccal	-1 day, 20:35:00
227 days, 10:49:00	73 days, 8:08:00	1 day, 7:42:00	02:16:00	1 day, 12:34:00	8 days, 22:32:00	BDL	17:33:00	BDL	BDL	01:27:00	00:48:00	00:10:00	00:58:00	00:46:00	ULdi1	EDJ1	buccal	-1 day, 20:35:00
227 days, 18:17:00	72 days, 4:14:00	23:06:00	BDL	1 day, 9:48:00	8 days, 12:32:00	BDL	15:38:00	BDL	00:08:00	01:02:00	00:47:00	00:09:00	00:55:00	00:42:00	ULdi1	EDJ1	buccal	-1 day, 21:15:00
228 days, 2:23:00	74 days, 20:02:00	1 day, 0:55:00	BDL	1 day, 4:07:00	8 days, 10:15:00	BDL	16:42:00	BDL	00:11:00	01:20:00	00:49:00	00:08:00	00:55:00	00:44:00	ULdi1	EDJ1	buccal	-1 day, 21:55:00
228 days, 9:50:00	70 days, 10:29:00	1 day, 3:40:00	BDL	1 day, 2:19:00	8 days, 11:13:00	BDL	16:39:00	00:06:00	BDL	01:04:00	00:46:00	00:07:00	00:55:00	00:43:00	ULdi1	EDJ1	buccal	-1 day, 21:55:00
228 days, 17:16:00	72 days, 11:19:00	1 day, 1:29:00	BDL	1 day, 13:08:00	8 days, 17:14:00	BDL	15:12:00	BDL	BDL	01:18:00	00:47:00	00:10:00	00:56:00	00:40:00	ULdi1	EDJ1	buccal	-1 day, 22:36:00
229 days, 1:23:00	73 days, 18:32:00	21:20:00	BDL	1 day, 5:37:00	8 days, 16:29:00	BDL	15:38:00	BDL	BDL	01:13:00	00:48:00	00:08:00	00:56:00	00:42:00	ULdi1	EDJ1	buccal	-1 day, 22:36:00
229 days, 8:49:00	73 days, 2:40:00	1 day, 3:19:00	BDL	1 day, 5:04:00	8 days, 17:15:00	BDL	15:08:00	BDL	00:08:00	01:01:00	00:47:00	00:08:00	00:57:00	00:41:00	ULdi1	EDJ1	buccal	-1 day, 23:16:00
229 days, 16:16:00	72 days, 7:41:00	22:18:00	BDL	1 day, 13:00:00	8 days, 17:48:00	BDL	15:34:00	BDL	BDL	01:08:00	00:47:00	00:10:00	00:57:00	00:41:00	ULdi1	EDJ1	buccal	-1 day, 23:57:00
230 days, 0:23:00	68 days, 22:05:00	1 day, 0:11:00	BDL	1 day, 11:21:00	8 days, 8:50:00	BDL	14:38:00	BDL	BDL	01:22:00	00:45:00	00:09:00	00:54:00	00:39:00	ULdi1	EDJ1	buccal	00:37:00
230 days, 7:50:00	71 days, 10:25:00	1 day, 2:50:00	BDL	1 day, 4:45:00	8 days, 14:16:00	BDL	15:07:00	BDL	BDL	01:11:00	00:46:00	00:08:00	00:56:00	00:41:00	ULdi1	EDJ1	buccal	01:17:00
230 days, 15:16:00	73 days, 0:26:00	1 day, 7:02:00	BDL	1 day, 14:13:00	8 days, 14:25:00	BDL	15:40:00	BDL	BDL	01:14:00	00:47:00	00:10:00	00:56:00	00:42:00	ULdi1	EDJ1	buccal	01:18:00
230 days, 23:23:00	71 days, 11:08:00	1 day, 1:01:00	BDL	1 day, 14:23:00	8 days, 11:25:00	BDL	14:02:00	BDL	00:08:00	01:06:00	00:46:00	00:10:00	00:55:00	00:38:00	ULdi1	EDJ1	buccal	01:58:00
231 days, 6:49:00	73 days, 9:08:00	15:14:00	BDL	1 day, 11:36:00	8 days, 15:15:00	BDL	14:24:00	BDL	BDL	01:04:00	00:48:00	00:10:00	00:56:00	00:37:00	ULdi1	EDJ1	buccal	02:39:00
231 days, 14:16:00	72 days, 18:07:00	20:10:00	BDL	1 day, 15:23:00	8 days, 13:58:00	BDL	14:26:00	BDL	BDL	00:53:00	00:47:00	00:10:00	00:56:00	00:39:00	ULdi1	EDJ1	buccal	02:39:00
231 days, 22:22:00	72 days, 11:17:00	20:54:00	BDL	1 day, 15:02:00	8 days, 8:50:00	BDL	15:04:00	BDL	BDL	01:17:00	00:47:00	00:10:00	00:54:00	00:40:00	ULdi1	EDJ1	buccal	03:20:00
232 days, 5:49:00	69 days, 5:36:00	1 day, 0:15:00	BDL	1 day, 8:00:00	8 days, 9:10:00	BDL	13:17:00	BDL	00:20:00	01:11:00	00:45:00	00:09:00	00:54:00	00:36:00	ULdi1	EDJ1	buccal	03:20:00
232 days, 13:16:00	70 days, 5:58:00	1 day, 4:41:00	BDL	1 day, 10:06:00	8 days, 12:53:00	BDL	14:49:00	BDL	00:11:00	01:01:00	00:46:00	00:09:00	00:55:00	00:39:00	ULdi1	EDJ1	buccal	04:01:00
232 days, 21:22:00	77 days, 1:14:00	23:48:00	BDL	1 day, 13:38:00	8 days, 16:14:00	BDL	15:14:00	BDL	00:11:00	01:10:00	00:50:00	00:10:00	00:56:00	00:40:00	ULdi1	EDJ1	buccal	04:01:00
233 days, 4:49:00	72 days, 0:14:00	23:33:00	BDL	1 day, 8:14:00	8 days, 5:14:00	BDL	15:00:00	BDL	BDL	01:05:00	00:47:00	00:09:00	00:53:00	00:39:00	ULdi1	EDJ1	buccal	04:42:00
233 days, 12:16:00	73 days, 12:19:00	21:29:00	BDL	1 day, 8:09:00	8 days, 4:57:00	BDL	15:37:00	BDL	BDL	01:03:00	00:48:00	00:09:00	00:53:00	00:42:00	ULdi1	EDJ1	buccal	05:23:00
233 days, 20:23:00	68 days, 14:23:00	1 day, 0:31:00	BDL	1 day, 15:33:00	8 days, 3:05:00	BDL	15:39:00	BDL	BDL	01:12:00	00:44:00	00:11:00	00:53:00	00:41:00	ULdi1	EDJ1	buccal	05:23:00
234 days, 3:49:00	71 days, 3:40:00	1 day, 3:17:00	BDL	1 day, 14:57:00	8 days, 11:43:00	BDL	16:17:00	BDL	BDL	01:00:00	00:46:00	00:10:00	00:55:00	00:43:00	ULdi1	EDJ1	buccal	06:04:00
234 days, 11:16:00	71 days, 13:29:00	1 day, 1:23:00	BDL	1 day, 11:38:00	8 days, 6:34:00	BDL	14:18:00	BDL	00:19:00	01:29:00	00:46:00	00:09:00	00:54:00	00:38:00	ULdi1	EDJ1	buccal	06:05:00
234 days, 19:22:00	70 days, 10:14:00	1 day, 6:59:00	BDL	1 day, 12:47:00	8 days, 9:32:00	BDL	16:18:00	BDL	BDL	01:23:00	00:46:00	00:10:00	00:54:00	00:44:00	ULdi1	EDJ1	buccal	06:46:00
235 days, 2:49:00	71 days, 5:09:00	1 day, 0:55:00	BDL	1 day, 18:20:00	8 days, 1:10:00	BDL	15:08:00	BDL	BDL	01:06:00	00:46:00	00:11:00	00:52:00	00:40:00	ULdi1	EDJ1	buccal	07:26:00
235 days, 10:15:00	71 days, 12:06:00	21:55:00	BDL	1 day, 15:51:00	8 days, 0:29:00	BDL	15:22:00	BDL	BDL	01:11:00	00:46:00	00:11:00	00:52:00	00:40:00	ULdi1	EDJ1	buccal	07:27:00
235 days, 18:23:00	71 days, 12:18:00	1 day, 5:20:00	BDL	1 day, 14:11:00	8 days, 8:12:00	BDL	16:29:00	BDL	00:08:00	01:25:00	00:46:00	00:10:00	00:54:00	00:44:00	ULdi1	EDJ1	buccal	08:08:00
236 days, 1:49:00	70 days, 4:12:00	1 day, 4:14:00	BDL	1 day, 16:20:00	8 days, 5:15:00	BDL	16:08:00	BDL	00:08:00	01:32:00	00:46:00	00:11:00	00:53:00	00:42:00	ULdi1	EDJ1	buccal	08:09:00
236 days, 9:16:00	68 days, 0:02:00	1 day, 4:05:00	BDL	1 day, 13:17:00	8 days, 0:53:00	BDL	14:46:00	BDL	00:12:00	01:28:00	00:44:00	00:10:00	00:52:00	00:39:00	ULdi1	EDJ1	buccal	08:50:00
236 days, 17:22:00	69 days, 6:16:00	1 day, 1:31:00	BDL	1 day, 14:21:00	7 days, 23:10:00	BDL	15:39:00	BDL	00:08:00	01:32:00	00:45:00	00:10:00	00:52:00	00:41:00	ULdi1	EDJ1	buccal	09:30:00
237 days, 0:49:00	71 days, 12:02:00	1 day, 2:22:00	BDL	1 day, 14:25:00	8 days, 0:30:00	BDL	15:54:00	BDL	00:10:00	01:35:00	00:46:00	00:10:00	00:52:00	00:42:00	ULdi1	EDJ1	buccal	09:31:00
237 days, 8:15:00	70 days, 2:05:00	1 day, 1:23:00	BDL	1 day, 16:18:00	8 days, 2:42:00	BDL	16:34:00	BDL	00:15:00	01:35:00	00:45:00	00:11:00	00:53:00	00:43:00	ULdi1	EDJ1	buccal	10:12:00
237 days, 16:22:00	67 days, 17:57:00	21:38:00	BDL	1 day, 9:39:00	8 days, 5:20:00	BDL	15:03:00	BDL	00:08:00	01:32:00	00:44:00	00:09:00	00:53:00	00:41:00	ULdi1	EDJ1	buccal	10:13:00
237 days, 23:49:00	70 days, 14:01:00	23:04:00	BDL	1 day, 9:59:00	8 days, 3:21:00	BDL	16:10:00	BDL	BDL	01:39:00	00:46:00	00:09:00	00:53:00	00:44:00	ULdi1	EDJ1	buccal	10:54:00
238 days, 7:15:00	70 days, 14:14:00	21:08:00	BDL	1 day, 14:02:00	8 days, 7:02:00	BDL	16:11:00	BDL	00:15:00	01:06:00	00:46:00	00:10:00	00:54:00	00:42:00	ULdi1	EDJ1	buccal	11:35:00
238 days, 15:22:00	71 days, 19:33:00	1 day, 3:10:00	BDL	1 day, 20:13:00	7 days, 23:29:00	BDL	15:36:00	BDL	00:13:00	01:07:00	00:47:00	00:12:00	00:52:00	00:42:00	ULdi1	EDJ1	buccal	11:36:00
238 days, 22:49:00	69 days, 6:04:00	21:55:00	02:04:00	1 day, 15:43:00	7 days, 19:41:00	BDL	15:30:00	BDL	00:24:00	01:24:00	00:45:00	00:11:00	00:51:00	00:40:00	ULdi1	EDJ1	buccal	12:17:00
239 days, 6:15:00	71 days, 3:11:00	1 day, 2:20:00	BDL	1 day, 14:41:00	8 days, 5:28:00	BDL	15:23:00	BDL	00:12:00	01:35:00	00:46:00	00:10:00	00:53:00	00:40:00	ULdi1	EDJ1	buccal	12:18:00
239 days, 14:22:00	69 days, 0:43:00	1 day, 1:20:00	BDL	1 day, 13:38:00	7 days, 23:35:00	BDL	14:32:00	BDL	00:20:00	01:20:00	00:45:00	00:10:00	00:52:00	00:39:00	ULdi1	EDJ1	buccal	12:59:00
239 days, 21:48:00	68 days, 14:32:00	1 day, 1:17:00	BDL	1 day, 12:50:00	8 days, 0:27:00	BDL	15:23:00	BDL	00:18:00	01:16:00	00:44:00	00:10:00	00:52:00	00:41:00	ULdi1	EDJ1	buccal	13:00:00
240 days, 5:15:00	70 days, 18:15:00	22:15:00	BDL	1 day, 15:33:00	8 days, 2:12:00	BDL	16:30:00	BDL	00:12:00	01:00:00	00:46:00	00:11:00	00:52:00	00:43:00	ULdi1	EDJ1	buccal	13:41:00
240 days, 13:22:00	71 days, 5:16:00	20:43:00	BDL	1 day, 11:57:00	8 days, 0:25:00	BDL	16:25:00	BDL	BDL	01:33:00	00:46:00	00:10:00	00:52:00	00:43:00	ULdi1	EDJ1	buccal	14:23:00
240 days, 20:48:00	69 days, 22:00:00	20:09:00	BDL	1 day, 11:56:00	7 days, 22:37:00	BDL	14:12:00	BDL	BDL	01:18:00	00:45:00	00:10:00	00:51:00	00:37:00	ULdi1	EDJ1	buccal	14:24:00
241 days, 4:16:00	70 days, 16:22:00	23:33:00	BDL	1 day, 17:25:00	8 days, 0:35:00	BDL	15:13:00	BDL	00:17:00	01:08:00	00:46:00	00:11:00	00:52:00	00:40:00	ULdi1	EDJ1	buccal	15:05:00
241 days, 12:22:00	74 days, 18:37:00	1 day, 4:43:00	BDL	1 day, 17:34:00	7 days, 20:34:00	00:11:00	13:10:00	BDL	00:23:00	01:17:00	00:48:00	00:11:00	00:51:00	00:35:00	ULdi1	EDJ1	buccal	15:06:00
241 days, 19:49:00	71 days, 16:30:00	1 day, 3:42:00	BDL	1 day, 12:37:00	7 days, 21:46:00	BDL	13:09:00	BDL	BDL	01:11:00	00:46:00	00:10:00	00:51:00	00:35:00	ULdi1	EDJ1	buccal	15:47:00
242 days, 3:15:00	68 days, 15:22:00	1 day, 0:38:00	BDL	1 day, 17:18:00	7 days, 23:05:00	00:20:00	14:13:00	BDL	00:22:00	01:08:00	00:45:00	00:11:00	00:52:00	00:37:00	ULdi1	EDJ1	buccal	16:28:00
242 days, 11:22:00	68 days, 18:22:00	1 day, 7:16:00	BDL	1 day, 9:00:00	7 days, 17:21:00	00:18:00	13:48:00	BDL	00:09:00	01:23:00	00:45:00	00:09:00	00:50:00	00:36:00	ULdi1	EDJ1	buccal	16:30:00
242 days, 18:48:00	68 days, 23:28:00	1 day, 2:28:00	BDL	1 day, 18:27:00	8 days, 1:58:00	00:19:00	15:19:00	BDL	00:18:00	01:08:00	00:45:00	00:11:00	00:52:00	00:40:00	ULdi1	EDJ1	buccal	17:11:00
243 days, 2:15:00	66 days, 21:20:00	23:25:00	02:37:00	1 day, 22:06:00	8 days, 0:10:00	00:18:00	15:20:00	BDL	00:09:00	01:39:00	00:43:00	00:12:00	00:52:00	00:40:00	ULdi1	EDJ1	buccal	17:12:00
243 days, 10:22:00	67 days, 21:18:00	23:10:00	BDL	1 day, 16:32:00	7 days, 23:40:00	00:13:00	14:36:00	BDL	BDL	01:24:00	00:44:00	00:11:00	00:52:00	00:38:00	ULdi1	EDJ1	buccal	17:54:00
243 days, 17:49:00	67 days, 8:38:00	1 day, 1:23:00	BDL	1 day, 18:19:00	7 days, 22:17:00	00:18:00	15:00:00	BDL	00:20:00	01:00:00	00:44:00	00:11:00	00:51:00	00:41:00	ULdi1	EDJ1	buccal	18:35:00
244 days, 1:15:00	71 days, 0:31:00	1 day, 3:18:00	02:09:00	1 day, 10:15:00	8 days, 1:37:00	00:26:00	15:20:00	00:14:00	00:09:00	01:28:00	00:46:00	00:09:00	00:52:00	00:40:00	ULdi1	EDJ1	buccal	18:36:00
244 days, 9:22:00	70 days, 0:56:00	1 day, 2:07:00	BDL	1 day, 16:27:00	8 days, 1:32:00	00:36:00	15:35:00	00:07:00	00:17:00	01:11:00	00:45:00	00:11:00	00:52:00	00:40:00	ULdi1	EDJ1	buccal	19:18:00
244 days, 16:48:00	70 days, 5:25:00	1 day, 4:04:00	BDL	1 day, 23:10:00	7 days, 19:43:00	00:44:00	14:02:00	00:10:00	BDL	01:14:00	00:46:00	00:13:00	00:51:00	00:38:00	ULdi1	EDJ1	buccal	19:19:00
245 days, 0:15:00	69 days, 0:51:00	1 day, 6:43:00	03:23:00	1 day, 17:56:00	8 days, 3:18:00	00:27:00	14:51:00	00:16:00	00:24:00	01:06:00	00:45:00	00:11:00	00:53:00	00:39:00	ULdi1	EDJ1	buccal	20:00:00
245 days, 8:21:00	69 days, 2:31:00	1 day, 2:48:00	02:00:00	1 day, 4:16:00	7 days, 20:44:00	00:23:00	15:03:00	00:08:00	00:14:00	01:42:00	00:45:00	00:08:00	00:51:00	00:40:00	ULdi1	EDJ1	buccal	20:02:00
245 days, 15:48:00	68 days, 22:05:00	1 day, 10:13:00	BDL	1 day, 19:04:00	7 days, 17:02:00	00:40:00	14:45:00	00:15:00	00:16:00	01:39:00	00:45:00	00:12:00	00:50:00	00:39:00	ULdi1	EDJ1	buccal	20:43:00
245 days, 23:15:00	70 days, 16:19:00	1 day, 8:20:00	BDL	1 day, 14:11:00	7 days, 21:26:00	00:53:00	13:54:00	00:19:00	00:10:00	01:01:00	00:46:00	00:10:00	00:51:00	00:37:00	ULdi1	EDJ1	buccal	21:24:00
246 days, 7:21:00	69 days, 12:14:00	2 days, 2:46:00	BDL	1 day, 13:05:00	7 days, 22:45:00	00:51:00	15:07:00	00:13:00	00:12:00	01:26:00	00:45:00	00:10:00	00:51:00	00:41:00	ULdi1	EDJ1	buccal	21:26:00
246 days, 14:48:00	69 days, 8:02:00	1 day, 13:23:00	02:12:00	1 day, 22:50:00	8 days, 7:35:00	00:48:00	15:46:00	00:14:00	00:17:00	01:39:00	00:45:00	00:13:00	00:54:00	00:42:00	ULdi1	EDJ1	buccal	22:07:00
246 days, 22:15:00	66 days, 4:15:00	1 day, 3:46:00	02:04:00	1 day, 15:33:00	8 days, 0:40:00	01:32:00	15:01:00	00:38:00	00:12:00	01:42:00	00:43:00	00:11:00	00:52:00	00:41:00	ULdi1	EDJ1	buccal	22:09:00
247 days, 6:22:00	66 days, 1:54:00	1 day, 2:06:00	03:08:00	1 day, 12:21:00	7 days, 22:06:00	01:02:00	15:18:00	00:29:00	00:19:00	01:11:00	00:43:00	00:10:00	00:51:00	00:40:00	ULdi1	EDJ1	buccal	22:50:00
247 days, 13:48:00	70 days, 3:41:00	1 day, 12:09:00	03:19:00	1 day, 20:50:00	8 days, 0:48:00	01:28:00	15:42:00	00:53:00	00:10:00	01:33:00	00:45:00	00:12:00	00:52:00	00:42:00	ULdi1	EDJ1	buccal	23:32:00
247 days, 21:15:00	69 days, 13:16:00	1 day, 16:27:00	03:28:00	1 day, 19:32:00	7 days, 20:16:00	01:10:00	15:25:00	00:31:00	00:24:00	01:29:00	00:45:00	00:12:00	00:51:00	00:41:00	ULdi1	EDJ1	buccal	23:33:00
248 days, 5:21:00	66 days, 7:15:00	1 day, 15:21:00	03:57:00	1 day, 11:20:00	8 days, 0:13:00	01:28:00	16:05:00	00:15:00	00:19:00	01:28:00	00:43:00	00:10:00	00:52:00	00:43:00	ULdi1	EDJ1	buccal	1 day, 0:15:00
248 days, 12:48:00	69 days, 16:09:00	2 days, 4:26:00	05:09:00	1 day, 17:25:00	8 days, 0:29:00	01:21:00	16:33:00	00:24:00	00:13:00	00:55:00	00:45:00	00:11:00	00:52:00	00:44:00	ULdi1	EDJ1	buccal	1 day, 0:16:00
248 days, 20:14:00	72 days, 6:27:00	2 days, 0:07:00	04:40:00	1 day, 23:37:00	8 days, 7:22:00	01:19:00	16:39:00	00:29:00	00:14:00	01:03:00	00:47:00	00:13:00	00:54:00	00:44:00	ULdi1	EDJ1	buccal	1 day, 0:58:00
249 days, 4:22:00	70 days, 14:45:00	2 days, 2:02:00	03:17:00	1 day, 9:57:00	8 days, 12:19:00	01:05:00	16:30:00	00:48:00	00:20:00	01:13:00	00:46:00	00:09:00	00:55:00	00:44:00	ULdi1	EDJ1	buccal	1 day, 1:00:00
249 days, 11:48:00	69 days, 8:39:00	1 day, 15:37:00	05:14:00	1 day, 16:37:00	8 days, 1:33:00	01:19:00	15:26:00	00:38:00	00:26:00	01:17:00	00:45:00	00:11:00	00:52:00	00:41:00	ULdi1	EDJ1	buccal	1 day, 1:41:00
249 days, 19:15:00	68 days, 1:36:00	1 day, 20:30:00	05:33:00	1 day, 14:51:00	7 days, 22:23:00	01:39:00	16:31:00	01:03:00	00:20:00	01:06:00	00:44:00	00:10:00	00:51:00	00:43:00	ULdi1	EDJ1	buccal	1 day, 2:23:00
250 days, 3:21:00	66 days, 11:42:00	2 days, 1:14:00	06:38:00	1 day, 11:34:00	7 days, 21:10:00	01:58:00	16:04:00	01:18:00	00:27:00	01:21:00	00:43:00	00:09:00	00:51:00	00:43:00	ULdi1	EDJ1	buccal	1 day, 2:24:00
250 days, 10:48:00	67 days, 19:18:00	1 day, 20:09:00	07:12:00	1 day, 14:44:00	7 days, 23:00:00	01:58:00	16:22:00	01:06:00	00:22:00	01:29:00	00:44:00	00:10:00	00:52:00	00:44:00	ULdi1	EDJ1	buccal	1 day, 3:06:00
250 days, 18:14:00	67 days, 9:51:00	2 days, 6:27:00	08:35:00	1 day, 10:50:00	8 days, 1:28:00	01:43:00	16:37:00	01:56:00	00:30:00	01:25:00	00:44:00	00:09:00	00:52:00	00:43:00	ULdi1	EDJ1	buccal	1 day, 3:08:00
251 days, 2:21:00	70 days, 13:41:00	2 days, 22:19:00	11:33:00	1 day, 17:11:00	8 days, 2:32:00	01:12:00	16:48:00	01:30:00	00:25:00	00:45:00	00:46:00	00:11:00	00:52:00	00:45:00	ULdi1	EDJ1	buccal	1 day, 3:49:00
251 days, 9:48:00	70 days, 5:21:00	2 days, 7:18:00	06:39:00	1 day, 10:24:00	8 days, 2:45:00	01:12:00	15:33:00	00:37:00	00:20:00	00:33:00	00:46:00	00:09:00	00:53:00	00:40:00	ULdi1	EDJ1	buccal	1 day, 4:31:00
251 days, 17:14:00	67 days, 12:36:00	1 day, 12:30:00	05:05:00	1 day, 15:28:00	8 days, 2:38:00	01:16:00	14:02:00	00:55:00	00:28:00	00:43:00	00:44:00	00:11:00	00:53:00	00:38:00	ULdi1	EDJ1	buccal	1 day, 4:33:00
252 days, 1:21:00	70 days, 9:17:00	1 day, 11:05:00	05:02:00	1 day, 14:10:00	8 days, 4:33:00	00:57:00	15:39:00	00:43:00	00:08:00	00:38:00	00:46:00	00:10:00	00:53:00	00:41:00	ULdi1	EDJ1	buccal	1 day, 5:14:00
252 days, 8:48:00	67 days, 23:50:00	1 day, 6:16:00	05:35:00	1 day, 15:46:00	8 days, 1:35:00	01:10:00	15:20:00	00:27:00	00:19:00	00:36:00	00:44:00	00:11:00	00:52:00	00:40:00	ULdi1	EDJ1	buccal	1 day, 5:16:00
252 days, 16:14:00	68 days, 10:05:00	20:54:00	03:03:00	1 day, 12:15:00	8 days, 3:13:00	00:36:00	15:02:00	00:12:00	00:14:00	00:43:00	00:44:00	00:10:00	00:53:00	00:40:00	ULdi1	EDJ1	buccal	1 day, 5:58:00
253 days, 0:21:00	66 days, 18:08:00	20:45:00	02:17:00	1 day, 10:25:00	8 days, 1:38:00	01:07:00	16:26:00	00:35:00	00:24:00	00:36:00	00:43:00	00:09:00	00:52:00	00:43:00	ULdi1	EDJ1	buccal	1 day, 6:39:00
253 days, 7:47:00	71 days, 15:35:00	1 day, 0:13:00	03:13:00	1 day, 11:39:00	8 days, 3:32:00	00:32:00	17:13:00	00:16:00	00:11:00	00:33:00	00:46:00	00:10:00	00:53:00	00:45:00	ULdi1	EDJ1	buccal	1 day, 6:41:00
253 days, 15:14:00	68 days, 0:16:00	17:58:00	04:03:00	1 day, 17:39:00	8 days, 1:18:00	00:56:00	16:07:00	00:34:00	00:12:00	00:35:00	00:44:00	00:11:00	00:52:00	00:42:00	ULdi1	EDJ1	buccal	1 day, 7:23:00
253 days, 23:21:00	69 days, 0:05:00	BDL	03:59:00	1 day, 10:33:00	7 days, 21:36:00	00:41:00	16:31:00	00:15:00	00:16:00	00:48:00	00:45:00	00:09:00	00:51:00	00:43:00	ULdi1	EDJ1	buccal	1 day, 7:25:00
254 days, 6:47:00	68 days, 4:16:00	14:50:00	BDL	1 day, 16:11:00	7 days, 23:14:00	00:50:00	16:28:00	00:11:00	00:20:00	00:50:00	00:44:00	00:11:00	00:52:00	00:43:00	ULdi1	EDJ1	buccal	1 day, 8:06:00
254 days, 14:15:00	70 days, 22:33:00	21:29:00	03:26:00	1 day, 5:06:00	7 days, 23:26:00	00:46:00	17:56:00	00:25:00	00:16:00	00:39:00	00:46:00	00:08:00	00:52:00	00:47:00	ULdi1	EDJ1	buccal	1 day, 8:08:00
254 days, 22:21:00	69 days, 14:36:00	17:07:00	03:01:00	1 day, 6:17:00	8 days, 7:08:00	00:59:00	16:51:00	00:46:00	00:20:00	00:45:00	00:45:00	00:08:00	00:54:00	00:45:00	ULdi1	EDJ1	buccal	1 day, 8:50:00
255 days, 5:48:00	69 days, 20:51:00	15:59:00	02:21:00	1 day, 14:26:00	7 days, 23:29:00	00:28:00	16:44:00	00:26:00	00:13:00	00:39:00	00:45:00	00:10:00	00:52:00	00:44:00	ULdi1	EDJ1	buccal	1 day, 9:32:00
255 days, 13:14:00	69 days, 21:21:00	16:51:00	BDL	1 day, 15:37:00	7 days, 23:49:00	00:14:00	15:44:00	00:11:00	00:15:00	00:41:00	00:45:00	00:11:00	00:52:00	00:42:00	ULdi1	EDJ1	buccal	1 day, 9:33:00
255 days, 21:21:00	70 days, 11:54:00	19:59:00	02:29:00	1 day, 20:22:00	7 days, 22:06:00	01:10:00	15:35:00	00:27:00	00:17:00	00:43:00	00:46:00	00:12:00	00:51:00	00:41:00	ULdi1	EDJ1	buccal	1 day, 10:15:00
256 days, 4:47:00	74 days, 18:29:00	15:54:00	04:26:00	1 day, 12:35:00	7 days, 22:27:00	01:08:00	15:42:00	00:31:00	00:20:00	00:32:00	00:48:00	00:10:00	00:51:00	00:42:00	ULdi1	EDJ1	buccal	1 day, 10:17:00
256 days, 12:14:00	73 days, 12:33:00	19:46:00	02:33:00	1 day, 11:37:00	7 days, 23:03:00	01:18:00	15:34:00	00:37:00	00:20:00	00:32:00	00:48:00	00:09:00	00:52:00	00:41:00	ULdi1	EDJ1	buccal	1 day, 10:59:00
256 days, 20:21:00	71 days, 4:07:00	14:57:00	02:28:00	1 day, 7:04:00	8 days, 0:39:00	00:39:00	14:56:00	00:16:00	00:08:00	00:22:00	00:46:00	00:08:00	00:52:00	00:39:00	ULdi1	EDJ1	buccal	1 day, 11:01:00
257 days, 3:48:00	72 days, 22:08:00	15:10:00	BDL	1 day, 9:36:00	8 days, 0:40:00	00:50:00	15:34:00	00:20:00	00:22:00	00:25:00	00:47:00	00:09:00	00:52:00	00:40:00	ULdi1	EDJ1	buccal	1 day, 11:43:00
257 days, 11:14:00	75 days, 18:39:00	14:37:00	BDL	1 day, 12:41:00	8 days, 9:19:00	00:11:00	14:28:00	BDL	BDL	00:12:00	00:49:00	00:10:00	00:54:00	00:39:00	ULdi1	EDJ1	buccal	1 day, 12:24:00
257 days, 19:21:00	75 days, 22:30:00	BDL	BDL	1 day, 19:21:00	8 days, 0:15:00	BDL	14:05:00	BDL	BDL	00:10:00	00:49:00	00:12:00	00:52:00	00:37:00	ULdi1	EDJ1	buccal	1 day, 12:26:00
258 days, 2:47:00	72 days, 18:24:00	BDL	BDL	1 day, 14:39:00	8 days, 1:02:00	BDL	13:24:00	BDL	00:08:00	00:09:00	00:47:00	00:10:00	00:52:00	00:36:00	ULdi1	EDJ1	buccal	1 day, 13:08:00
258 days, 10:14:00	73 days, 13:30:00	14:04:00	BDL	1 day, 12:59:00	7 days, 20:50:00	BDL	13:01:00	BDL	00:10:00	00:10:00	00:48:00	00:10:00	00:51:00	00:35:00	ULdi1	EDJ1	buccal	1 day, 13:10:00
258 days, 18:20:00	76 days, 3:25:00	BDL	02:15:00	1 day, 14:52:00	7 days, 19:09:00	BDL	14:14:00	BDL	00:09:00	00:06:00	00:49:00	00:10:00	00:50:00	00:37:00	ULdi1	EDJ1	buccal	1 day, 13:52:00
259 days, 1:47:00	75 days, 9:23:00	BDL	BDL	1 day, 3:07:00	8 days, 2:07:00	BDL	13:43:00	BDL	BDL	00:04:00	00:49:00	00:07:00	00:52:00	00:36:00	ULdi1	EDJ1	buccal	1 day, 14:34:00
259 days, 9:14:00	76 days, 5:35:00	BDL	BDL	1 day, 11:59:00	7 days, 23:40:00	BDL	12:15:00	BDL	BDL	00:06:00	00:49:00	00:10:00	00:52:00	00:33:00	ULdi1	EDJ1	buccal	1 day, 14:36:00
259 days, 17:20:00	79 days, 1:35:00	BDL	BDL	1 day, 16:08:00	8 days, 5:12:00	BDL	12:49:00	BDL	BDL	00:09:00	00:51:00	00:11:00	00:53:00	00:34:00	ULdi1	EDJ1	buccal	1 day, 15:18:00
260 days, 0:47:00	80 days, 1:15:00	BDL	BDL	1 day, 8:03:00	8 days, 0:28:00	BDL	12:20:00	BDL	BDL	00:09:00	00:52:00	00:09:00	00:52:00	00:33:00	ULdi1	EDJ1	buccal	1 day, 15:20:00
260 days, 8:14:00	78 days, 2:56:00	BDL	BDL	1 day, 18:46:00	8 days, 5:20:00	BDL	14:21:00	BDL	BDL	00:13:00	00:51:00	00:11:00	00:53:00	00:37:00	ULdi1	EDJ1	buccal	1 day, 16:01:00
260 days, 16:21:00	75 days, 3:15:00	BDL	BDL	2 days, 0:14:00	8 days, 3:09:00	BDL	14:07:00	BDL	00:11:00	00:28:00	00:49:00	00:13:00	00:53:00	00:37:00	ULdi1	EDJ1	buccal	1 day, 16:03:00
260 days, 23:47:00	75 days, 7:26:00	BDL	BDL	1 day, 9:14:00	8 days, 1:40:00	BDL	15:47:00	BDL	BDL	00:26:00	00:49:00	00:09:00	00:52:00	00:42:00	ULdi1	EDJ1	buccal	1 day, 16:45:00
261 days, 7:14:00	76 days, 6:11:00	14:11:00	BDL	1 day, 17:16:00	8 days, 11:27:00	BDL	16:55:00	BDL	BDL	00:30:00	00:49:00	00:11:00	00:55:00	00:45:00	ULdi1	EDJ1	buccal	1 day, 17:27:00
261 days, 15:20:00	74 days, 6:37:00	BDL	02:38:00	1 day, 14:56:00	7 days, 23:38:00	BDL	16:59:00	BDL	00:09:00	00:15:00	00:48:00	00:10:00	00:52:00	00:45:00	ULdi1	EDJ1	buccal	1 day, 17:29:00
261 days, 22:47:00	75 days, 12:11:00	BDL	BDL	1 day, 19:29:00	8 days, 8:38:00	BDL	17:11:00	BDL	00:12:00	00:29:00	00:49:00	00:12:00	00:54:00	00:45:00	ULdi1	EDJ1	buccal	1 day, 18:11:00
262 days, 6:13:00	76 days, 16:22:00	BDL	BDL	1 day, 21:37:00	8 days, 7:45:00	BDL	16:21:00	BDL	00:12:00	00:39:00	00:50:00	00:12:00	00:54:00	00:43:00	ULdi1	EDJ1	buccal	1 day, 18:13:00
262 days, 14:21:00	76 days, 14:25:00	BDL	BDL	1 day, 19:30:00	8 days, 7:06:00	BDL	17:02:00	BDL	00:09:00	00:41:00	00:50:00	00:12:00	00:54:00	00:46:00	ULdi1	EDJ1	buccal	1 day, 18:55:00
262 days, 21:47:00	73 days, 22:51:00	BDL	BDL	2 days, 0:16:00	8 days, 7:18:00	BDL	17:05:00	00:06:00	00:16:00	00:35:00	00:48:00	00:13:00	00:54:00	00:45:00	ULdi1	EDJ1	buccal	1 day, 19:37:00
263 days, 5:14:00	75 days, 6:30:00	BDL	BDL	1 day, 22:14:00	8 days, 3:21:00	BDL	15:29:00	BDL	00:14:00	00:28:00	00:49:00	00:12:00	00:53:00	00:41:00	ULdi1	EDJ1	buccal	1 day, 19:39:00
263 days, 13:20:00	75 days, 13:25:00	16:53:00	BDL	1 day, 22:32:00	8 days, 3:24:00	00:11:00	16:34:00	00:09:00	00:15:00	00:32:00	00:49:00	00:12:00	00:53:00	00:44:00	ULdi1	EDJ1	buccal	1 day, 20:21:00
263 days, 20:47:00	73 days, 1:11:00	BDL	BDL	1 day, 21:54:00	8 days, 2:26:00	00:33:00	16:50:00	00:06:00	00:16:00	00:52:00	00:47:00	00:12:00	00:53:00	00:45:00	ULdi1	EDJ1	buccal	1 day, 20:23:00
264 days, 4:13:00	76 days, 11:05:00	15:24:00	BDL	1 day, 14:13:00	8 days, 6:31:00	00:19:00	18:00:00	00:13:00	00:19:00	00:31:00	00:50:00	00:10:00	00:53:00	00:48:00	ULdi1	EDJ1	buccal	1 day, 21:05:00
264 days, 12:20:00	74 days, 5:18:00	BDL	02:28:00	1 day, 18:12:00	8 days, 3:05:00	00:12:00	16:29:00	00:26:00	00:08:00	00:41:00	00:48:00	00:11:00	00:53:00	00:44:00	ULdi1	EDJ1	buccal	1 day, 21:07:00
264 days, 19:47:00	77 days, 12:13:00	23:09:00	BDL	1 day, 21:00:00	8 days, 1:35:00	00:50:00	16:21:00	00:32:00	00:17:00	00:33:00	00:50:00	00:12:00	00:52:00	00:43:00	ULdi1	EDJ1	buccal	1 day, 21:49:00
265 days, 3:13:00	79 days, 4:34:00	1 day, 3:31:00	02:38:00	1 day, 13:42:00	8 days, 6:22:00	00:57:00	15:09:00	00:52:00	00:13:00	00:44:00	00:51:00	00:10:00	00:53:00	00:40:00	ULdi1	EDJ1	buccal	1 day, 22:31:00
265 days, 11:20:00	77 days, 23:52:00	1 day, 0:51:00	BDL	1 day, 16:14:00	7 days, 23:42:00	01:32:00	15:04:00	01:07:00	00:17:00	00:46:00	00:51:00	00:11:00	00:52:00	00:40:00	ULdi1	EDJ1	buccal	1 day, 22:33:00
265 days, 18:47:00	77 days, 23:15:00	1 day, 7:05:00	02:26:00	1 day, 22:07:00	8 days, 9:06:00	02:15:00	16:35:00	01:18:00	00:24:00	01:34:00	00:51:00	00:12:00	00:54:00	00:44:00	ULdi1	EDJ1	buccal	1 day, 23:15:00
266 days, 2:13:00	78 days, 15:32:00	1 day, 1:50:00	03:17:00	2 days, 12:25:00	8 days, 2:03:00	01:16:00	14:41:00	01:00:00	00:24:00	00:53:00	00:51:00	00:16:00	00:52:00	00:39:00	ULdi1	EDJ1	buccal	1 day, 23:17:00
266 days, 10:20:00	75 days, 6:18:00	18:02:00	BDL	1 day, 17:11:00	8 days, 3:19:00	00:17:00	13:36:00	00:08:00	BDL	00:15:00	00:49:00	00:11:00	00:53:00	00:35:00	ULdi1	EDJ1	buccal	1 day, 23:59:00
266 days, 17:46:00	75 days, 14:31:00	BDL	BDL	1 day, 6:49:00	7 days, 14:28:00	BDL	11:31:00	BDL	BDL	00:08:00	00:49:00	00:08:00	00:49:00	00:29:00	ULdi1	EDJ1	buccal	2 days, 0:01:00
267 days, 1:13:00	75 days, 23:44:00	BDL	BDL	1 day, 13:52:00	7 days, 23:05:00	BDL	10:08:00	BDL	BDL	00:01:00	00:49:00	00:10:00	00:52:00	00:27:00	ULdi1	EDJ1	buccal	2 days, 0:43:00
267 days, 9:20:00	80 days, 12:36:00	BDL	BDL	1 day, 18:13:00	7 days, 21:22:00	BDL	09:20:00	BDL	BDL	00:01:00	00:52:00	00:11:00	00:51:00	00:25:00	ULdi1	EDJ1	buccal	2 days, 1:25:00
267 days, 16:46:00	80 days, 0:29:00	BDL	BDL	1 day, 13:59:00	8 days, 1:16:00	BDL	10:31:00	BDL	BDL	00:02:00	00:52:00	00:10:00	00:52:00	00:27:00	ULdi1	EDJ1	buccal	2 days, 1:27:00
268 days, 0:14:00	81 days, 6:14:00	BDL	BDL	1 day, 10:14:00	7 days, 23:39:00	BDL	11:08:00	BDL	BDL	00:04:00	00:53:00	00:09:00	00:52:00	00:30:00	ULdi1	EDJ1	buccal	2 days, 2:09:00
268 days, 8:20:00	80 days, 13:46:00	BDL	BDL	1 day, 23:29:00	7 days, 22:15:00	BDL	11:40:00	BDL	BDL	00:10:00	00:52:00	00:13:00	00:51:00	00:31:00	ULdi1	EDJ1	buccal	2 days, 2:12:00
268 days, 15:47:00	76 days, 15:26:00	BDL	02:32:00	1 day, 10:24:00	7 days, 21:59:00	BDL	10:57:00	BDL	BDL	00:08:00	00:50:00	00:09:00	00:51:00	00:29:00	ULdi1	EDJ1	buccal	2 days, 2:54:00
268 days, 23:13:00	81 days, 2:29:00	BDL	BDL	1 day, 13:12:00	7 days, 21:39:00	BDL	11:13:00	BDL	BDL	00:05:00	00:53:00	00:10:00	00:51:00	00:30:00	ULdi1	EDJ1	buccal	2 days, 3:36:00
269 days, 7:20:00	81 days, 11:49:00	BDL	BDL	1 day, 16:06:00	8 days, 0:15:00	BDL	11:12:00	BDL	BDL	00:02:00	00:53:00	00:11:00	00:52:00	00:29:00	ULdi1	EDJ1	buccal	2 days, 3:38:00
269 days, 14:46:00	79 days, 22:08:00	BDL	BDL	2 days, 0:27:00	7 days, 20:32:00	BDL	10:24:00	BDL	BDL	BDL	00:52:00	00:13:00	00:51:00	00:28:00	ULdi1	EDJ1	buccal	2 days, 4:20:00
269 days, 22:13:00	80 days, 19:45:00	BDL	BDL	2 days, 4:22:00	7 days, 18:05:00	BDL	10:01:00	BDL	BDL	BDL	00:52:00	00:14:00	00:50:00	00:26:00	ULdi1	EDJ1	buccal	2 days, 4:22:00
270 days, 6:20:00	80 days, 14:48:00	BDL	BDL	1 day, 16:45:00	7 days, 20:00:00	BDL	10:27:00	BDL	BDL	00:01:00	00:52:00	00:11:00	00:51:00	00:28:00	ULdi1	EDJ1	buccal	2 days, 5:04:00
270 days, 13:47:00	80 days, 13:23:00	BDL	BDL	2 days, 3:41:00	8 days, 1:45:00	BDL	09:31:00	BDL	00:08:00	00:01:00	00:52:00	00:14:00	00:52:00	00:25:00	ULdi1	EDJ1	buccal	2 days, 5:07:00
270 days, 21:13:00	79 days, 8:06:00	BDL	BDL	1 day, 16:35:00	7 days, 22:00:00	BDL	10:29:00	BDL	00:09:00	BDL	00:51:00	00:11:00	00:51:00	00:28:00	ULdi1	EDJ1	buccal	2 days, 5:49:00
271 days, 5:20:00	79 days, 0:25:00	BDL	BDL	1 day, 23:21:00	7 days, 22:15:00	BDL	10:06:00	BDL	BDL	BDL	00:51:00	00:13:00	00:51:00	00:27:00	ULdi1	EDJ1	buccal	2 days, 6:31:00
271 days, 12:46:00	77 days, 0:07:00	BDL	BDL	1 day, 21:52:00	7 days, 20:20:00	BDL	10:33:00	BDL	BDL	BDL	00:50:00	00:12:00	00:51:00	00:27:00	ULdi1	EDJ1	buccal	2 days, 6:33:00
271 days, 20:13:00	75 days, 16:15:00	BDL	02:39:00	1 day, 18:14:00	7 days, 14:00:00	BDL	10:11:00	BDL	BDL	BDL	00:49:00	00:11:00	00:49:00	00:26:00	ULdi1	EDJ1	buccal	2 days, 7:15:00
272 days, 4:19:00	80 days, 1:14:00	BDL	BDL	2 days, 3:20:00	7 days, 23:00:00	BDL	09:19:00	BDL	BDL	00:01:00	00:52:00	00:14:00	00:52:00	00:24:00	ULdi1	EDJ1	buccal	2 days, 7:18:00
272 days, 11:46:00	79 days, 11:50:00	BDL	BDL	2 days, 5:32:00	7 days, 15:30:00	BDL	09:37:00	BDL	BDL	BDL	00:52:00	00:14:00	00:50:00	00:24:00	ULdi1	EDJ1	buccal	2 days, 8:00:00
272 days, 19:13:00	78 days, 4:21:00	BDL	BDL	2 days, 0:00:00	7 days, 22:36:00	BDL	10:09:00	BDL	BDL	BDL	00:51:00	00:13:00	00:51:00	00:26:00	ULdi1	EDJ1	buccal	2 days, 8:02:00
273 days, 3:19:00	81 days, 6:46:00	BDL	BDL	2 days, 0:06:00	7 days, 19:40:00	BDL	09:06:00	BDL	BDL	BDL	00:53:00	00:13:00	00:51:00	00:24:00	ULdi1	EDJ1	buccal	2 days, 8:44:00
273 days, 10:46:00	79 days, 5:44:00	BDL	BDL	2 days, 1:32:00	7 days, 20:53:00	BDL	09:21:00	BDL	BDL	BDL	00:51:00	00:13:00	00:51:00	00:24:00	ULdi1	EDJ1	buccal	2 days, 9:27:00
273 days, 18:13:00	80 days, 18:01:00	BDL	BDL	2 days, 8:14:00	8 days, 0:15:00	BDL	09:14:00	BDL	BDL	BDL	00:52:00	00:15:00	00:52:00	00:25:00	ULdi1	EDJ1	buccal	2 days, 9:29:00
274 days, 2:20:00	79 days, 21:22:00	BDL	BDL	2 days, 2:22:00	7 days, 15:33:00	BDL	09:17:00	BDL	BDL	BDL	00:52:00	00:14:00	00:49:00	00:24:00	ULdi1	EDJ1	buccal	2 days, 10:11:00
274 days, 9:46:00	80 days, 19:25:00	BDL	BDL	2 days, 7:37:00	8 days, 0:12:00	BDL	09:00:00	BDL	BDL	BDL	00:52:00	00:15:00	00:52:00	00:23:00	ULdi1	EDJ1	buccal	2 days, 10:14:00
274 days, 17:13:00	83 days, 4:01:00	BDL	BDL	2 days, 10:09:00	8 days, 1:07:00	BDL	09:34:00	BDL	00:08:00	BDL	00:54:00	00:16:00	00:52:00	00:25:00	ULdi1	EDJ1	buccal	2 days, 10:56:00
275 days, 1:19:00	83 days, 6:55:00	BDL	BDL	2 days, 9:33:00	7 days, 22:41:00	BDL	10:12:00	BDL	BDL	BDL	00:54:00	00:15:00	00:51:00	00:26:00	ULdi1	EDJ1	buccal	2 days, 11:38:00
275 days, 8:46:00	77 days, 21:47:00	BDL	BDL	1 day, 23:15:00	7 days, 19:16:00	BDL	10:06:00	BDL	BDL	BDL	00:51:00	00:13:00	00:51:00	00:27:00	ULdi1	EDJ1	buccal	2 days, 11:41:00
275 days, 16:12:00	81 days, 19:44:00	BDL	BDL	2 days, 10:09:00	7 days, 23:07:00	BDL	11:33:00	BDL	00:07:00	00:01:00	00:53:00	00:16:00	00:52:00	00:30:00	ULdi1	EDJ1	buccal	2 days, 12:23:00
276 days, 0:20:00	78 days, 13:21:00	BDL	BDL	2 days, 16:13:00	7 days, 20:23:00	BDL	11:32:00	BDL	BDL	BDL	00:51:00	00:17:00	00:51:00	00:30:00	ULdi1	EDJ1	buccal	2 days, 12:26:00
276 days, 7:46:00	84 days, 6:37:00	BDL	BDL	2 days, 16:22:00	8 days, 1:25:00	BDL	13:20:00	BDL	00:07:00	BDL	00:55:00	00:17:00	00:52:00	00:36:00	ULdi1	EDJ1	buccal	2 days, 13:08:00
276 days, 15:13:00	80 days, 6:31:00	BDL	BDL	2 days, 16:22:00	8 days, 5:03:00	BDL	14:46:00	BDL	BDL	BDL	00:52:00	00:17:00	00:53:00	00:39:00	ULdi1	EDJ1	buccal	2 days, 13:10:00
276 days, 23:19:00	77 days, 15:16:00	BDL	BDL	3 days, 2:29:00	8 days, 0:10:00	BDL	15:22:00	BDL	BDL	BDL	00:50:00	00:20:00	00:52:00	00:40:00	ULdi1	EDJ1	buccal	2 days, 13:53:00
277 days, 6:46:00	80 days, 17:16:00	BDL	BDL	2 days, 15:24:00	8 days, 3:55:00	BDL	17:00:00	BDL	BDL	00:01:00	00:52:00	00:17:00	00:53:00	00:45:00	ULdi1	EDJ1	buccal	2 days, 14:35:00
277 days, 14:12:00	80 days, 12:51:00	BDL	BDL	3 days, 2:55:00	8 days, 5:13:00	BDL	18:34:00	BDL	00:08:00	BDL	00:52:00	00:20:00	00:53:00	00:50:00	ULdi1	EDJ1	buccal	2 days, 14:38:00
277 days, 22:19:00	77 days, 1:07:00	BDL	BDL	2 days, 14:25:00	8 days, 5:32:00	BDL	17:37:00	BDL	BDL	BDL	00:50:00	00:17:00	00:53:00	00:47:00	ULdi1	EDJ1	buccal	2 days, 15:20:00
278 days, 5:46:00	78 days, 22:29:00	BDL	BDL	2 days, 14:43:00	8 days, 9:28:00	BDL	17:18:00	BDL	00:11:00	BDL	00:51:00	00:17:00	00:54:00	00:45:00	ULdi1	EDJ1	buccal	2 days, 15:23:00
278 days, 13:12:00	74 days, 20:21:00	BDL	BDL	2 days, 23:46:00	8 days, 2:32:00	BDL	14:51:00	BDL	BDL	BDL	00:49:00	00:19:00	00:52:00	00:39:00	ULdi1	EDJ1	buccal	2 days, 16:05:00
278 days, 21:19:00	78 days, 13:47:00	BDL	BDL	3 days, 3:59:00	8 days, 8:42:00	BDL	16:18:00	BDL	BDL	BDL	00:51:00	00:20:00	00:54:00	00:43:00	ULdi1	EDJ1	buccal	2 days, 16:08:00
279 days, 4:46:00	76 days, 7:18:00	BDL	BDL	3 days, 3:20:00	8 days, 6:17:00	BDL	15:14:00	BDL	00:08:00	BDL	00:49:00	00:20:00	00:53:00	00:40:00	ULdi1	EDJ1	buccal	2 days, 16:51:00
279 days, 12:13:00	76 days, 13:37:00	BDL	BDL	2 days, 19:06:00	8 days, 5:57:00	BDL	15:44:00	BDL	00:13:00	BDL	00:50:00	00:18:00	00:53:00	00:42:00	ULdi1	EDJ1	buccal	2 days, 17:33:00
279 days, 20:19:00	78 days, 21:04:00	BDL	BDL	2 days, 23:57:00	8 days, 3:03:00	BDL	14:24:00	BDL	00:09:00	BDL	00:51:00	00:19:00	00:53:00	00:38:00	ULdi1	EDJ1	buccal	2 days, 17:36:00
280 days, 3:45:00	77 days, 20:32:00	BDL	BDL	3 days, 7:32:00	7 days, 21:00:00	BDL	14:35:00	BDL	BDL	BDL	00:50:00	00:21:00	00:51:00	00:39:00	ULdi1	EDJ1	buccal	2 days, 18:18:00
280 days, 11:12:00	78 days, 5:07:00	BDL	BDL	2 days, 19:31:00	8 days, 4:58:00	BDL	14:40:00	BDL	BDL	BDL	00:51:00	00:18:00	00:53:00	00:39:00	ULdi1	EDJ1	buccal	2 days, 18:21:00
280 days, 19:19:00	77 days, 7:00:00	BDL	BDL	3 days, 1:37:00	8 days, 8:34:00	BDL	14:15:00	BDL	00:11:00	BDL	00:50:00	00:20:00	00:54:00	00:38:00	ULdi1	EDJ1	buccal
281 days, 2:45:00	78 days, 8:50:00	BDL	BDL	2 days, 23:24:00	8 days, 8:40:00	BDL	15:37:00	BDL	BDL	BDL	00:51:00	00:19:00	00:54:00	00:42:00	ULdi1	EDJ1	buccal
281 days, 10:13:00	76 days, 4:36:00	BDL	BDL	3 days, 3:55:00	8 days, 2:03:00	BDL	15:08:00	BDL	BDL	BDL	00:49:00	00:20:00	00:52:00	00:40:00	ULdi1	EDJ1	buccal
281 days, 18:19:00	77 days, 0:17:00	BDL	BDL	3 days, 0:50:00	8 days, 6:38:00	BDL	14:50:00	BDL	00:08:00	BDL	00:50:00	00:20:00	00:54:00	00:39:00	ULdi1	EDJ1	buccal
282 days, 1:46:00	75 days, 2:22:00	BDL	BDL	3 days, 4:22:00	8 days, 1:59:00	BDL	13:35:00	BDL	BDL	BDL	00:49:00	00:20:00	00:52:00	00:35:00	ULdi1	EDJ1	buccal
282 days, 9:12:00	78 days, 0:48:00	BDL	BDL	3 days, 13:21:00	8 days, 7:38:00	BDL	15:09:00	BDL	BDL	BDL	00:51:00	00:23:00	00:54:00	00:41:00	ULdi1	EDJ1	buccal
282 days, 17:19:00	82 days, 4:09:00	BDL	BDL	3 days, 4:47:00	8 days, 6:03:00	BDL	15:12:00	BDL	00:11:00	00:01:00	00:53:00	00:21:00	00:54:00	00:40:00	ULdi1	EDJ1	buccal
283 days, 0:45:00	82 days, 0:31:00	BDL	BDL	3 days, 1:24:00	8 days, 7:33:00	BDL	17:04:00	BDL	BDL	BDL	00:53:00	00:20:00	00:54:00	00:45:00	ULdi1	EDJ1	buccal
283 days, 8:12:00	79 days, 6:12:00	BDL	BDL	3 days, 9:17:00	8 days, 8:11:00	BDL	16:04:00	BDL	00:16:00	BDL	00:51:00	00:22:00	00:54:00	00:42:00	ULdi1	EDJ1	buccal
283 days, 16:19:00	82 days, 9:26:00	BDL	BDL	3 days, 9:12:00	8 days, 11:48:00	BDL	16:10:00	BDL	00:12:00	BDL	00:53:00	00:22:00	00:55:00	00:42:00	ULdi1	EDJ1	buccal
283 days, 23:46:00	80 days, 3:43:00	BDL	BDL	3 days, 5:38:00	8 days, 5:25:00	BDL	14:37:00	BDL	00:08:00	BDL	00:52:00	00:21:00	00:53:00	00:39:00	ULdi1	EDJ1	buccal
284 days, 7:12:00	80 days, 19:43:00	BDL	BDL	3 days, 9:36:00	8 days, 7:32:00	BDL	15:18:00	BDL	00:07:00	BDL	00:52:00	00:22:00	00:54:00	00:41:00	ULdi1	EDJ1	buccal
284 days, 15:19:00	79 days, 1:36:00	BDL	BDL	3 days, 7:39:00	8 days, 10:34:00	BDL	16:27:00	BDL	00:08:00	BDL	00:51:00	00:21:00	00:55:00	00:43:00	ULdi1	EDJ1	buccal
284 days, 22:45:00	78 days, 0:51:00	BDL	BDL	2 days, 21:40:00	8 days, 9:31:00	BDL	17:48:00	BDL	BDL	BDL	00:51:00	00:19:00	00:54:00	00:47:00	ULdi1	EDJ1	buccal
285 days, 6:12:00	79 days, 18:43:00	BDL	BDL	2 days, 13:08:00	8 days, 13:11:00	BDL	18:25:00	BDL	BDL	BDL	00:52:00	00:16:00	00:55:00	00:48:00	ULdi1	EDJ1	buccal
285 days, 14:18:00	79 days, 10:01:00	BDL	BDL	3 days, 2:04:00	8 days, 14:08:00	BDL	19:34:00	BDL	00:10:00	00:01:00	00:52:00	00:20:00	00:56:00	00:52:00	ULdi1	EDJ1	buccal
285 days, 21:45:00	79 days, 0:08:00	BDL	BDL	2 days, 16:23:00	8 days, 15:53:00	BDL	21:03:00	BDL	00:09:00	00:02:00	00:51:00	00:17:00	00:56:00	00:56:00	ULdi1	EDJ1	buccal
286 days, 5:12:00	81 days, 21:23:00	BDL	BDL	2 days, 21:50:00	9 days, 2:03:00	BDL	23:38:00	BDL	00:10:00	00:01:00	00:53:00	00:19:00	00:59:00	01:02:00	ULdi1	EDJ1	buccal
286 days, 13:18:00	81 days, 17:53:00	BDL	02:53:00	2 days, 15:27:00	8 days, 19:27:00	BDL	1 day, 3:04:00	BDL	BDL	00:15:00	00:53:00	00:17:00	00:57:00	01:13:00	ULdi1	EDJ1	buccal
286 days, 20:45:00	77 days, 23:27:00	18:25:00	BDL	2 days, 18:09:00	9 days, 5:26:00	BDL	1 day, 7:59:00	BDL	BDL	00:52:00	00:51:00	00:18:00	01:00:00	01:25:00	ULdi1	EDJ1	buccal
287 days, 4:12:00	80 days, 3:03:00	16:14:00	03:50:00	2 days, 12:21:00	9 days, 13:27:00	BDL	1 day, 12:08:00	BDL	00:07:00	01:47:00	00:52:00	00:16:00	01:02:00	01:36:00	ULdi1	EDJ1	buccal
287 days, 12:19:00	81 days, 7:19:00	17:13:00	04:18:00	2 days, 17:14:00	9 days, 13:09:00	00:11:00	1 day, 18:06:00	BDL	00:19:00	02:30:00	00:53:00	00:18:00	01:02:00	01:53:00	ULdi1	EDJ1	buccal
287 days, 19:45:00	80 days, 16:37:00	1 day, 4:09:00	05:29:00	2 days, 9:36:00	9 days, 19:20:00	BDL	1 day, 21:13:00	BDL	BDL	02:44:00	00:52:00	00:15:00	01:03:00	02:02:00	ULdi1	EDJ1	buccal
288 days, 3:12:00	76 days, 6:20:00	1 day, 5:36:00	05:08:00	2 days, 5:09:00	9 days, 20:30:00	BDL	2 days, 0:38:00	BDL	00:18:00	03:20:00	00:49:00	00:14:00	01:04:00	02:11:00	ULdi1	EDJ1	buccal
288 days, 11:18:00	77 days, 16:32:00	1 day, 5:11:00	06:13:00	2 days, 12:31:00	10 days, 4:18:00	BDL	1 day, 20:45:00	BDL	00:13:00	03:04:00	00:50:00	00:16:00	01:06:00	02:00:00	ULdi1	EDJ1	buccal
288 days, 18:45:00	76 days, 16:48:00	1 day, 0:20:00	03:21:00	2 days, 23:24:00	9 days, 14:27:00	BDL	1 day, 18:28:00	BDL	00:15:00	02:22:00	00:50:00	00:19:00	01:02:00	01:54:00	ULdi1	EDJ1	buccal
289 days, 2:11:00	81 days, 14:59:00	22:03:00	BDL	2 days, 23:11:00	9 days, 22:54:00	BDL	1 day, 16:23:00	BDL	00:12:00	01:01:00	00:53:00	00:19:00	01:04:00	01:49:00	ULdi1	EDJ1	buccal
289 days, 10:19:00	81 days, 12:09:00	17:39:00	04:03:00	2 days, 13:39:00	9 days, 15:03:00	BDL	1 day, 14:21:00	BDL	BDL	01:24:00	00:53:00	00:17:00	01:02:00	01:43:00	ULdi1	EDJ1	buccal
289 days, 17:45:00	82 days, 0:04:00	1 day, 3:02:00	04:35:00	2 days, 23:55:00	9 days, 17:11:00	BDL	1 day, 20:01:00	BDL	00:12:00	02:51:00	00:53:00	00:19:00	01:03:00	01:59:00	ULdi1	EDJ1	buccal
290 days, 1:12:00	77 days, 4:38:00	1 day, 12:10:00	07:35:00	3 days, 6:16:00	9 days, 19:08:00	BDL	2 days, 0:29:00	BDL	00:32:00	05:02:00	00:50:00	00:21:00	01:03:00	02:09:00	ULdi1	EDJ1	buccal
290 days, 9:18:00	77 days, 21:41:00	1 day, 16:09:00	11:07:00	4 days, 6:31:00	10 days, 5:07:00	00:21:00	2 days, 7:07:00	00:16:00	01:16:00	09:03:00	00:51:00	00:28:00	01:06:00	02:29:00	ULdi1	EDJ1	buccal
290 days, 16:45:00	78 days, 6:44:00	1 day, 18:15:00	15:18:00	5 days, 10:55:00	10 days, 14:21:00	01:01:00	2 days, 13:43:00	00:42:00	01:39:00	15:14:00	00:51:00	00:35:00	01:09:00	02:46:00	ULdi1	EDJ1	buccal
291 days, 0:11:00	78 days, 18:23:00	2 days, 0:39:00	18:11:00	5 days, 20:32:00	10 days, 15:29:00	01:32:00	2 days, 18:14:00	01:07:00	01:41:00	19:15:00	00:51:00	00:38:00	01:09:00	02:59:00	ULdi1	EDJ1	buccal
00:00:00	103 days, 13:32:00	2 days, 6:30:00	03:32:00	6 days, 3:38:00	10 days, 8:44:00	BDL	1 day, 23:24:00	BDL	02:12:00	17:58:00	01:07:00	00:40:00	01:07:00	02:07:00	URM1	EDJ2	Buccal	09:20:00
08:06:00	106 days, 12:57:00	2 days, 11:38:00	04:06:00	6 days, 14:23:00	10 days, 12:09:00	BDL	2 days, 0:27:00	BDL	02:21:00	17:22:00	01:09:00	00:43:00	01:08:00	02:10:00	URM1	EDJ2	Buccal	10:06:00
15:33:00	107 days, 16:32:00	2 days, 4:15:00	03:08:00	6 days, 18:06:00	11 days, 1:12:00	BDL	1 day, 23:39:00	BDL	02:22:00	18:03:00	01:10:00	00:44:00	01:12:00	02:08:00	URM1	EDJ2	Buccal	10:12:00
23:00:00	105 days, 8:25:00	2 days, 4:30:00	04:38:00	6 days, 10:09:00	11 days, 1:20:00	BDL	1 day, 23:52:00	BDL	02:13:00	18:13:00	01:08:00	00:42:00	01:12:00	02:08:00	URM1	EDJ2	Buccal	10:58:00
1 day, 7:06:00	101 days, 23:01:00	2 days, 4:00:00	04:20:00	6 days, 9:50:00	10 days, 20:30:00	BDL	2 days, 0:16:00	BDL	02:09:00	17:00:00	01:06:00	00:41:00	01:10:00	02:10:00	URM1	EDJ2	Buccal	11:05:00
1 day, 14:33:00	103 days, 11:05:00	2 days, 7:13:00	04:24:00	6 days, 7:18:00	10 days, 13:27:00	BDL	2 days, 0:36:00	BDL	02:06:00	17:11:00	01:07:00	00:41:00	01:08:00	02:11:00	URM1	EDJ2	Buccal	11:51:00
1 day, 22:39:00	102 days, 22:08:00	2 days, 8:26:00	03:44:00	6 days, 2:37:00	10 days, 19:41:00	BDL	2 days, 1:57:00	BDL	02:23:00	17:35:00	01:07:00	00:40:00	01:10:00	02:14:00	URM1	EDJ2	Buccal	12:37:00
2 days, 6:07:00	103 days, 10:40:00	2 days, 10:12:00	04:18:00	6 days, 4:08:00	10 days, 19:31:00	BDL	2 days, 1:30:00	BDL	03:25:00	17:54:00	01:07:00	00:40:00	01:10:00	02:13:00	URM1	EDJ2	Buccal	12:44:00
2 days, 13:33:00	99 days, 18:56:00	2 days, 2:03:00	03:40:00	5 days, 23:08:00	10 days, 10:34:00	BDL	1 day, 23:57:00	BDL	02:22:00	18:02:00	01:05:00	00:39:00	01:08:00	02:09:00	URM1	EDJ2	Buccal	13:30:00
2 days, 21:00:00	102 days, 16:29:00	2 days, 8:41:00	03:17:00	6 days, 5:34:00	10 days, 18:09:00	BDL	2 days, 4:24:00	BDL	02:30:00	17:22:00	01:07:00	00:40:00	01:10:00	02:20:00	URM1	EDJ2	Buccal	13:36:00
3 days, 5:06:00	107 days, 22:11:00	2 days, 8:01:00	04:49:00	6 days, 4:48:00	11 days, 3:32:00	BDL	2 days, 5:01:00	BDL	02:00:00	18:05:00	01:10:00	00:40:00	01:12:00	02:22:00	URM1	EDJ2	Buccal	14:23:00
3 days, 12:33:00	106 days, 14:44:00	2 days, 16:37:00	04:06:00	6 days, 3:36:00	10 days, 22:28:00	BDL	2 days, 1:47:00	BDL	02:31:00	18:11:00	01:09:00	00:40:00	01:11:00	02:14:00	URM1	EDJ2	Buccal	14:29:00
3 days, 20:39:00	95 days, 16:37:00	2 days, 4:04:00	03:29:00	5 days, 22:19:00	10 days, 16:10:00	BDL	2 days, 2:06:00	BDL	01:52:00	19:11:00	01:02:00	00:38:00	01:09:00	02:15:00	URM1	EDJ2	Buccal	15:15:00
4 days, 4:06:00	108 days, 0:04:00	2 days, 7:40:00	04:05:00	5 days, 23:28:00	10 days, 18:32:00	BDL	2 days, 5:16:00	BDL	02:11:00	18:53:00	01:10:00	00:39:00	01:10:00	02:23:00	URM1	EDJ2	Buccal	15:22:00
4 days, 11:33:00	101 days, 18:49:00	2 days, 3:10:00	04:06:00	6 days, 4:35:00	10 days, 18:36:00	BDL	2 days, 1:09:00	BDL	02:31:00	18:36:00	01:06:00	00:40:00	01:10:00	02:12:00	URM1	EDJ2	Buccal	16:08:00
4 days, 19:00:00	104 days, 22:09:00	2 days, 5:30:00	04:04:00	6 days, 5:08:00	10 days, 19:17:00	BDL	2 days, 2:27:00	BDL	02:08:00	17:31:00	01:08:00	00:40:00	01:10:00	02:16:00	URM1	EDJ2	Buccal	16:15:00
5 days, 3:06:00	106 days, 6:29:00	2 days, 11:38:00	04:15:00	5 days, 23:07:00	11 days, 0:03:00	BDL	2 days, 6:23:00	BDL	02:14:00	16:11:00	01:09:00	00:39:00	01:11:00	02:25:00	URM1	EDJ2	Buccal	17:01:00
5 days, 10:33:00	101 days, 18:49:00	2 days, 8:00:00	04:08:00	5 days, 21:14:00	10 days, 10:15:00	BDL	2 days, 2:17:00	BDL	01:58:00	15:52:00	01:06:00	00:38:00	01:08:00	02:15:00	URM1	EDJ2	Buccal	17:08:00
5 days, 18:39:00	108 days, 2:44:00	2 days, 11:04:00	04:23:00	6 days, 6:20:00	10 days, 17:02:00	BDL	2 days, 4:40:00	BDL	02:07:00	16:17:00	01:10:00	00:41:00	01:09:00	02:22:00	URM1	EDJ2	Buccal	17:54:00
6 days, 2:06:00	105 days, 11:31:00	2 days, 7:37:00	04:36:00	6 days, 0:37:00	10 days, 21:35:00	BDL	2 days, 4:15:00	BDL	02:14:00	16:42:00	01:08:00	00:39:00	01:11:00	02:20:00	URM1	EDJ2	Buccal	18:01:00
6 days, 9:32:00	107 days, 19:28:00	2 days, 9:50:00	04:07:00	6 days, 12:21:00	10 days, 20:37:00	BDL	2 days, 4:26:00	BDL	02:19:00	16:38:00	01:10:00	00:42:00	01:10:00	02:20:00	URM1	EDJ2	Buccal	18:48:00
6 days, 17:39:00	105 days, 20:40:00	2 days, 11:16:00	03:40:00	5 days, 23:43:00	10 days, 18:17:00	BDL	2 days, 4:24:00	BDL	02:05:00	16:36:00	01:09:00	00:39:00	01:10:00	02:20:00	URM1	EDJ2	Buccal	19:34:00
7 days, 1:06:00	103 days, 3:36:00	2 days, 8:00:00	04:25:00	5 days, 22:09:00	10 days, 15:53:00	BDL	2 days, 0:20:00	BDL	02:13:00	16:34:00	01:07:00	00:38:00	01:09:00	02:10:00	URM1	EDJ2	Buccal	19:41:00
7 days, 8:32:00	107 days, 8:19:00	2 days, 11:01:00	04:03:00	6 days, 1:20:00	10 days, 22:21:00	BDL	2 days, 4:43:00	BDL	02:04:00	17:03:00	01:10:00	00:39:00	01:11:00	02:22:00	URM1	EDJ2	Buccal	20:28:00
7 days, 16:00:00	110 days, 22:00:00	2 days, 8:01:00	04:48:00	6 days, 2:25:00	11 days, 4:01:00	BDL	2 days, 3:03:00	BDL	01:31:00	17:35:00	01:12:00	00:39:00	01:12:00	02:18:00	URM1	EDJ2	Buccal	20:34:00
8 days, 0:06:00	110 days, 5:55:00	2 days, 18:44:00	04:24:00	5 days, 19:01:00	10 days, 23:22:00	BDL	2 days, 1:44:00	BDL	02:16:00	17:59:00	01:12:00	00:37:00	01:11:00	02:14:00	URM1	EDJ2	Buccal	21:21:00
8 days, 7:33:00	108 days, 22:14:00	2 days, 6:30:00	04:01:00	5 days, 10:29:00	10 days, 23:01:00	BDL	2 days, 0:43:00	BDL	02:08:00	17:06:00	01:11:00	00:35:00	01:11:00	02:11:00	URM1	EDJ2	Buccal	21:28:00
8 days, 15:39:00	109 days, 15:22:00	2 days, 6:09:00	04:48:00	5 days, 14:04:00	11 days, 3:39:00	BDL	1 day, 22:35:00	BDL	01:48:00	16:12:00	01:11:00	00:36:00	01:12:00	02:05:00	URM1	EDJ2	Buccal	22:14:00
8 days, 23:06:00	107 days, 21:09:00	2 days, 8:34:00	03:47:00	6 days, 17:30:00	10 days, 18:18:00	BDL	2 days, 3:18:00	BDL	02:09:00	16:27:00	01:10:00	00:43:00	01:10:00	02:17:00	URM1	EDJ2	Buccal	22:21:00
9 days, 6:32:00	109 days, 0:33:00	2 days, 3:24:00	03:34:00	6 days, 2:22:00	11 days, 1:27:00	BDL	1 day, 23:16:00	BDL	01:57:00	17:09:00	01:11:00	00:40:00	01:12:00	02:07:00	URM1	EDJ2	Buccal	23:08:00
9 days, 14:39:00	110 days, 10:47:00	2 days, 2:21:00	04:32:00	5 days, 23:23:00	10 days, 22:05:00	BDL	2 days, 0:12:00	BDL	01:56:00	16:27:00	01:12:00	00:39:00	01:11:00	02:10:00	URM1	EDJ2	Buccal	23:15:00
9 days, 22:06:00	108 days, 8:37:00	2 days, 6:21:00	04:13:00	5 days, 22:40:00	10 days, 20:46:00	BDL	2 days, 0:15:00	BDL	01:54:00	16:28:00	01:10:00	00:38:00	01:10:00	02:10:00	URM1	EDJ2	Buccal	1 day, 0:02:00
10 days, 5:33:00	107 days, 19:59:00	2 days, 5:04:00	04:08:00	5 days, 21:25:00	10 days, 22:27:00	BDL	2 days, 1:43:00	BDL	02:16:00	16:39:00	01:10:00	00:38:00	01:11:00	02:14:00	URM1	EDJ2	Buccal	1 day, 0:08:00
10 days, 13:39:00	108 days, 20:04:00	2 days, 8:28:00	04:20:00	6 days, 2:42:00	11 days, 5:19:00	BDL	2 days, 1:28:00	BDL	02:24:00	16:22:00	01:11:00	00:40:00	01:13:00	02:13:00	URM1	EDJ2	Buccal	1 day, 0:55:00
10 days, 21:06:00	113 days, 2:08:00	2 days, 7:22:00	04:27:00	6 days, 6:24:00	10 days, 19:44:00	BDL	2 days, 1:33:00	BDL	02:12:00	16:59:00	01:13:00	00:41:00	01:10:00	02:12:00	URM1	EDJ2	Buccal	1 day, 1:02:00
11 days, 4:32:00	108 days, 23:52:00	2 days, 8:37:00	05:33:00	6 days, 1:16:00	10 days, 15:30:00	BDL	2 days, 0:14:00	BDL	02:05:00	15:23:00	01:11:00	00:39:00	01:09:00	02:09:00	URM1	EDJ2	Buccal	1 day, 1:49:00
11 days, 12:39:00	112 days, 20:30:00	2 days, 3:38:00	04:22:00	5 days, 21:28:00	11 days, 1:32:00	BDL	2 days, 2:45:00	BDL	02:04:00	16:02:00	01:13:00	00:38:00	01:12:00	02:16:00	URM1	EDJ2	Buccal	1 day, 2:36:00
11 days, 20:05:00	109 days, 12:38:00	2 days, 5:33:00	04:11:00	6 days, 0:31:00	11 days, 0:13:00	BDL	2 days, 1:29:00	BDL	01:53:00	17:04:00	01:11:00	00:39:00	01:11:00	02:12:00	URM1	EDJ2	Buccal	1 day, 2:43:00
12 days, 3:32:00	109 days, 16:02:00	2 days, 5:17:00	03:22:00	5 days, 14:15:00	10 days, 18:04:00	BDL	1 day, 23:55:00	BDL	01:27:00	17:30:00	01:11:00	00:36:00	01:10:00	02:09:00	URM1	EDJ2	Buccal	1 day, 3:30:00
12 days, 11:39:00	111 days, 22:19:00	2 days, 6:01:00	04:17:00	6 days, 7:24:00	11 days, 3:34:00	BDL	2 days, 2:06:00	BDL	02:01:00	18:16:00	01:13:00	00:41:00	01:12:00	02:14:00	URM1	EDJ2	Buccal	1 day, 3:37:00
12 days, 19:05:00	110 days, 6:18:00	2 days, 8:12:00	04:43:00	5 days, 22:53:00	10 days, 19:43:00	BDL	2 days, 3:03:00	BDL	02:30:00	17:51:00	01:12:00	00:39:00	01:10:00	02:18:00	URM1	EDJ2	Buccal	1 day, 4:24:00
13 days, 2:32:00	107 days, 19:22:00	2 days, 9:21:00	04:23:00	6 days, 8:20:00	11 days, 6:18:00	00:06:00	2 days, 3:37:00	BDL	02:14:00	17:21:00	01:10:00	00:41:00	01:13:00	02:18:00	URM1	EDJ2	Buccal	1 day, 4:31:00
13 days, 10:39:00	113 days, 12:03:00	2 days, 8:22:00	04:19:00	5 days, 20:26:00	10 days, 23:50:00	BDL	2 days, 2:05:00	BDL	01:51:00	17:57:00	01:14:00	00:38:00	01:11:00	02:15:00	URM1	EDJ2	Buccal	1 day, 5:18:00
13 days, 18:05:00	113 days, 8:44:00	2 days, 9:12:00	05:33:00	5 days, 21:40:00	10 days, 18:27:00	BDL	2 days, 5:24:00	BDL	01:46:00	18:44:00	01:14:00	00:38:00	01:10:00	02:23:00	URM1	EDJ2	Buccal	1 day, 5:25:00
14 days, 1:32:00	110 days, 6:30:00	2 days, 2:44:00	04:07:00	5 days, 21:31:00	10 days, 20:05:00	BDL	2 days, 4:04:00	BDL	02:02:00	18:32:00	01:12:00	00:38:00	01:10:00	02:21:00	URM1	EDJ2	Buccal	1 day, 6:12:00
14 days, 9:39:00	117 days, 22:16:00	2 days, 7:49:00	05:02:00	6 days, 9:44:00	11 days, 13:18:00	BDL	2 days, 8:00:00	BDL	01:40:00	18:58:00	01:16:00	00:41:00	01:15:00	02:31:00	URM1	EDJ2	Buccal	1 day, 6:19:00
14 days, 17:05:00	112 days, 22:47:00	2 days, 8:22:00	04:41:00	6 days, 7:14:00	10 days, 22:46:00	BDL	2 days, 4:57:00	BDL	01:41:00	18:39:00	01:13:00	00:41:00	01:11:00	02:22:00	URM1	EDJ2	Buccal	1 day, 7:06:00
15 days, 0:32:00	117 days, 8:12:00	2 days, 6:06:00	05:40:00	6 days, 14:15:00	11 days, 6:23:00	BDL	2 days, 7:05:00	BDL	01:44:00	18:16:00	01:16:00	00:43:00	01:13:00	02:29:00	URM1	EDJ2	Buccal	1 day, 7:13:00
15 days, 8:38:00	115 days, 12:24:00	2 days, 12:13:00	05:05:00	6 days, 7:55:00	11 days, 10:21:00	BDL	2 days, 10:22:00	BDL	02:02:00	19:06:00	01:15:00	00:41:00	01:14:00	02:36:00	URM1	EDJ2	Buccal	1 day, 8:00:00
15 days, 16:06:00	116 days, 10:37:00	2 days, 10:11:00	04:44:00	6 days, 3:34:00	11 days, 5:23:00	BDL	2 days, 5:17:00	BDL	01:56:00	19:09:00	01:16:00	00:40:00	01:13:00	02:24:00	URM1	EDJ2	Buccal	1 day, 8:07:00
15 days, 23:32:00	115 days, 3:32:00	2 days, 6:03:00	05:06:00	5 days, 20:25:00	11 days, 6:11:00	BDL	2 days, 6:05:00	BDL	01:57:00	20:09:00	01:15:00	00:38:00	01:13:00	02:25:00	URM1	EDJ2	Buccal	1 day, 8:54:00
16 days, 7:39:00	122 days, 7:26:00	2 days, 12:47:00	04:21:00	5 days, 23:30:00	11 days, 8:09:00	BDL	2 days, 6:08:00	BDL	01:46:00	20:16:00	01:19:00	00:39:00	01:13:00	02:26:00	URM1	EDJ2	Buccal	1 day, 9:01:00
16 days, 15:05:00	115 days, 1:15:00	2 days, 8:04:00	04:26:00	6 days, 0:25:00	11 days, 8:15:00	BDL	2 days, 3:51:00	BDL	02:12:00	20:10:00	01:15:00	00:39:00	01:14:00	02:19:00	URM1	EDJ2	Buccal	1 day, 9:48:00
16 days, 22:32:00	124 days, 10:11:00	2 days, 10:37:00	04:12:00	6 days, 10:34:00	11 days, 13:26:00	BDL	2 days, 5:53:00	BDL	01:19:00	21:00:00	01:21:00	00:42:00	01:15:00	02:25:00	URM1	EDJ2	Buccal	1 day, 10:35:00
17 days, 6:38:00	121 days, 0:07:00	2 days, 6:13:00	05:05:00	6 days, 11:21:00	11 days, 10:23:00	BDL	2 days, 6:11:00	BDL	02:24:00	21:21:00	01:18:00	00:42:00	01:14:00	02:26:00	URM1	EDJ2	Buccal	1 day, 10:42:00
17 days, 14:05:00	124 days, 4:37:00	2 days, 11:35:00	05:33:00	5 days, 21:40:00	11 days, 11:50:00	BDL	2 days, 7:00:00	BDL	02:27:00	21:41:00	01:21:00	00:38:00	01:14:00	02:28:00	URM1	EDJ2	Buccal	1 day, 11:29:00
17 days, 21:32:00	126 days, 7:42:00	2 days, 12:18:00	05:16:00	6 days, 4:37:00	11 days, 13:07:00	BDL	2 days, 8:42:00	BDL	02:17:00	22:01:00	01:22:00	00:40:00	01:15:00	02:32:00	URM1	EDJ2	Buccal	1 day, 11:36:00
18 days, 5:39:00	118 days, 20:21:00	2 days, 6:28:00	05:00:00	5 days, 19:12:00	11 days, 4:31:00	BDL	2 days, 6:27:00	00:04:00	02:17:00	20:55:00	01:17:00	00:38:00	01:13:00	02:26:00	URM1	EDJ2	Buccal	1 day, 12:23:00
18 days, 13:05:00	122 days, 20:10:00	2 days, 10:16:00	04:41:00	5 days, 21:04:00	11 days, 10:35:00	BDL	2 days, 5:36:00	BDL	01:58:00	21:44:00	01:20:00	00:38:00	01:14:00	02:24:00	URM1	EDJ2	Buccal	1 day, 12:30:00
18 days, 20:32:00	129 days, 17:08:00	2 days, 7:58:00	05:30:00	5 days, 17:36:00	11 days, 9:03:00	BDL	2 days, 6:21:00	BDL	02:20:00	22:20:00	01:24:00	00:37:00	01:14:00	02:27:00	URM1	EDJ2	Buccal	1 day, 13:17:00
19 days, 4:38:00	124 days, 23:32:00	2 days, 12:07:00	05:24:00	6 days, 12:47:00	11 days, 13:32:00	BDL	2 days, 7:48:00	BDL	01:58:00	21:49:00	01:21:00	00:42:00	01:15:00	02:30:00	URM1	EDJ2	Buccal	1 day, 13:23:00
19 days, 12:05:00	121 days, 1:11:00	2 days, 11:09:00	05:57:00	6 days, 16:19:00	11 days, 5:39:00	BDL	2 days, 7:04:00	BDL	01:37:00	22:00:00	01:19:00	00:43:00	01:13:00	02:28:00	URM1	EDJ2	Buccal	1 day, 14:10:00
19 days, 19:31:00	120 days, 13:38:00	2 days, 7:28:00	04:56:00	6 days, 15:20:00	11 days, 10:04:00	BDL	2 days, 8:57:00	BDL	02:01:00	22:09:00	01:18:00	00:43:00	01:14:00	02:33:00	URM1	EDJ2	Buccal	1 day, 14:17:00
20 days, 3:38:00	119 days, 16:09:00	2 days, 7:25:00	05:40:00	6 days, 20:32:00	11 days, 3:24:00	BDL	2 days, 8:03:00	BDL	02:01:00	22:55:00	01:18:00	00:44:00	01:12:00	02:30:00	URM1	EDJ2	Buccal	1 day, 15:04:00
20 days, 11:05:00	125 days, 5:30:00	2 days, 14:09:00	04:59:00	6 days, 20:35:00	11 days, 18:12:00	BDL	2 days, 11:02:00	BDL	01:56:00	23:04:00	01:21:00	00:44:00	01:16:00	02:40:00	URM1	EDJ2	Buccal	1 day, 15:11:00
20 days, 18:31:00	122 days, 7:54:00	2 days, 12:36:00	05:37:00	6 days, 21:29:00	11 days, 16:21:00	BDL	2 days, 11:23:00	BDL	02:28:00	23:31:00	01:19:00	00:45:00	01:16:00	02:39:00	URM1	EDJ2	Buccal	1 day, 15:58:00
21 days, 2:39:00	123 days, 15:09:00	2 days, 13:29:00	05:12:00	6 days, 21:50:00	11 days, 12:48:00	BDL	2 days, 10:04:00	BDL	02:18:00	23:36:00	01:20:00	00:45:00	01:15:00	02:37:00	URM1	EDJ2	Buccal	1 day, 16:05:00
21 days, 10:05:00	120 days, 16:37:00	2 days, 16:29:00	05:17:00	6 days, 13:10:00	11 days, 10:43:00	BDL	2 days, 8:04:00	00:04:00	02:09:00	1 day, 0:32:00	01:18:00	00:42:00	01:14:00	02:31:00	URM1	EDJ2	Buccal	1 day, 16:52:00
21 days, 17:32:00	122 days, 9:14:00	2 days, 14:21:00	05:06:00	7 days, 9:41:00	11 days, 17:47:00	BDL	2 days, 11:33:00	BDL	02:03:00	1 day, 0:24:00	01:19:00	00:48:00	01:16:00	02:40:00	URM1	EDJ2	Buccal	1 day, 17:38:00
22 days, 1:38:00	123 days, 0:21:00	2 days, 12:51:00	05:57:00	6 days, 19:20:00	11 days, 14:13:00	BDL	2 days, 10:15:00	BDL	02:12:00	1 day, 1:09:00	01:20:00	00:44:00	01:15:00	02:36:00	URM1	EDJ2	Buccal	1 day, 17:45:00
22 days, 9:05:00	124 days, 14:12:00	2 days, 11:27:00	05:26:00	6 days, 9:25:00	11 days, 21:27:00	BDL	2 days, 9:21:00	00:04:00	01:59:00	23:22:00	01:21:00	00:41:00	01:17:00	02:34:00	URM1	EDJ2	Buccal	1 day, 18:32:00
22 days, 16:31:00	117 days, 15:46:00	2 days, 7:51:00	06:12:00	5 days, 22:35:00	11 days, 12:51:00	BDL	2 days, 9:01:00	BDL	01:57:00	23:11:00	01:16:00	00:38:00	01:15:00	02:34:00	URM1	EDJ2	Buccal	1 day, 18:39:00
23 days, 0:38:00	119 days, 0:05:00	2 days, 10:57:00	05:35:00	6 days, 11:08:00	11 days, 22:37:00	BDL	2 days, 9:14:00	BDL	02:06:00	1 day, 0:40:00	01:17:00	00:42:00	01:17:00	02:33:00	URM1	EDJ2	Buccal	1 day, 19:26:00
23 days, 8:05:00	122 days, 22:10:00	2 days, 5:25:00	04:57:00	6 days, 8:59:00	11 days, 7:53:00	BDL	2 days, 6:08:00	BDL	01:19:00	23:14:00	01:20:00	00:41:00	01:13:00	02:26:00	URM1	EDJ2	Buccal	1 day, 19:33:00
23 days, 15:32:00	122 days, 10:19:00	2 days, 11:38:00	03:52:00	5 days, 22:15:00	11 days, 19:48:00	BDL	2 days, 7:43:00	00:06:00	02:00:00	22:59:00	01:19:00	00:38:00	01:17:00	02:30:00	URM1	EDJ2	Buccal	1 day, 20:20:00
23 days, 23:38:00	119 days, 3:40:00	2 days, 11:08:00	04:47:00	6 days, 6:20:00	11 days, 13:15:00	BDL	2 days, 6:17:00	BDL	01:51:00	22:57:00	01:17:00	00:41:00	01:15:00	02:26:00	URM1	EDJ2	Buccal	1 day, 20:27:00
24 days, 7:05:00	121 days, 23:13:00	2 days, 6:31:00	05:25:00	6 days, 1:31:00	12 days, 2:05:00	BDL	2 days, 6:31:00	BDL	02:05:00	23:09:00	01:19:00	00:39:00	01:18:00	02:27:00	URM1	EDJ2	Buccal	1 day, 21:14:00
24 days, 14:31:00	117 days, 0:17:00	2 days, 10:11:00	04:58:00	6 days, 4:29:00	11 days, 12:01:00	BDL	2 days, 5:16:00	BDL	02:11:00	21:14:00	01:16:00	00:40:00	01:14:00	02:24:00	URM1	EDJ2	Buccal	1 day, 21:21:00
24 days, 22:38:00	115 days, 11:45:00	2 days, 11:22:00	05:23:00	6 days, 5:47:00	11 days, 11:25:00	BDL	2 days, 8:05:00	BDL	01:55:00	21:21:00	01:15:00	00:40:00	01:14:00	02:31:00	URM1	EDJ2	Buccal	1 day, 22:08:00
25 days, 6:04:00	115 days, 9:39:00	2 days, 10:55:00	04:56:00	5 days, 21:46:00	11 days, 5:38:00	BDL	2 days, 4:14:00	BDL	01:55:00	21:16:00	01:15:00	00:38:00	01:13:00	02:20:00	URM1	EDJ2	Buccal	1 day, 22:15:00
25 days, 13:31:00	115 days, 22:36:00	2 days, 6:03:00	04:19:00	6 days, 5:55:00	11 days, 16:56:00	BDL	2 days, 1:39:00	BDL	01:24:00	20:59:00	01:15:00	00:40:00	01:16:00	02:13:00	URM1	EDJ2	Buccal	1 day, 23:03:00
25 days, 21:38:00	120 days, 7:08:00	2 days, 3:16:00	05:24:00	5 days, 18:33:00	11 days, 21:08:00	BDL	2 days, 1:40:00	BDL	01:29:00	22:01:00	01:18:00	00:37:00	01:17:00	02:14:00	URM1	EDJ2	Buccal	1 day, 23:10:00
26 days, 5:04:00	127 days, 15:31:00	2 days, 5:28:00	05:22:00	6 days, 2:35:00	11 days, 19:28:00	BDL	2 days, 2:10:00	BDL	01:53:00	21:58:00	01:23:00	00:40:00	01:17:00	02:14:00	URM1	EDJ2	Buccal	1 day, 23:57:00
26 days, 12:31:00	122 days, 10:04:00	2 days, 8:36:00	05:29:00	6 days, 6:25:00	11 days, 16:49:00	BDL	2 days, 2:36:00	BDL	02:01:00	21:38:00	01:19:00	00:41:00	01:16:00	02:15:00	URM1	EDJ2	Buccal	2 days, 0:04:00
26 days, 20:38:00	116 days, 14:36:00	2 days, 4:32:00	05:23:00	5 days, 21:30:00	11 days, 14:04:00	BDL	2 days, 5:08:00	BDL	02:10:00	21:16:00	01:16:00	00:38:00	01:15:00	02:22:00	URM1	EDJ2	Buccal	2 days, 0:51:00
27 days, 4:04:00	124 days, 22:03:00	2 days, 9:00:00	05:07:00	6 days, 2:04:00	11 days, 17:40:00	BDL	2 days, 4:10:00	BDL	02:03:00	22:05:00	01:21:00	00:39:00	01:16:00	02:21:00	URM1	EDJ2	Buccal	2 days, 1:39:00
27 days, 11:31:00	119 days, 23:09:00	2 days, 9:18:00	05:18:00	5 days, 20:05:00	11 days, 15:40:00	BDL	2 days, 6:20:00	BDL	01:50:00	22:04:00	01:18:00	00:38:00	01:16:00	02:25:00	URM1	EDJ2	Buccal	2 days, 1:46:00
27 days, 19:38:00	123 days, 0:36:00	2 days, 12:32:00	06:10:00	6 days, 1:36:00	11 days, 22:01:00	BDL	2 days, 4:03:00	BDL	01:32:00	22:08:00	01:20:00	00:39:00	01:17:00	02:21:00	URM1	EDJ2	Buccal	2 days, 2:34:00
28 days, 3:04:00	115 days, 15:39:00	2 days, 4:17:00	04:50:00	6 days, 0:01:00	11 days, 10:14:00	BDL	2 days, 0:45:00	BDL	01:50:00	21:20:00	01:15:00	00:39:00	01:14:00	02:11:00	URM1	EDJ2	Buccal	2 days, 2:41:00
28 days, 10:31:00	119 days, 17:32:00	2 days, 3:15:00	05:19:00	6 days, 2:21:00	12 days, 1:44:00	BDL	2 days, 3:37:00	BDL	01:03:00	22:35:00	01:18:00	00:40:00	01:18:00	02:19:00	URM1	EDJ2	Buccal	2 days, 3:28:00
28 days, 18:37:00	140 days, 4:17:00	2 days, 3:04:00	06:14:00	7 days, 11:38:00	11 days, 20:58:00	BDL	2 days, 6:04:00	BDL	01:58:00	1 day, 1:21:00	01:31:00	00:48:00	01:17:00	02:25:00	URM1	EDJ2	Buccal	2 days, 3:36:00
29 days, 2:05:00	113 days, 4:05:00	2 days, 1:49:00	04:49:00	5 days, 15:22:00	10 days, 22:35:00	BDL	2 days, 0:24:00	BDL	01:17:00	21:01:00	01:13:00	00:36:00	01:11:00	02:10:00	URM1	EDJ2	Buccal	2 days, 4:24:00
29 days, 9:31:00	116 days, 15:36:00	2 days, 6:39:00	06:00:00	5 days, 23:15:00	11 days, 18:42:00	BDL	2 days, 2:48:00	BDL	01:29:00	22:38:00	01:16:00	00:39:00	01:16:00	02:16:00	URM1	EDJ2	Buccal	2 days, 4:31:00
29 days, 17:38:00	117 days, 23:27:00	2 days, 3:31:00	05:22:00	6 days, 2:24:00	12 days, 0:00:00	00:06:00	2 days, 4:17:00	BDL	02:14:00	23:02:00	01:17:00	00:40:00	01:18:00	02:21:00	URM1	EDJ2	Buccal	2 days, 5:19:00
30 days, 1:04:00	118 days, 2:40:00	2 days, 2:59:00	05:00:00	6 days, 9:28:00	12 days, 4:30:00	BDL	2 days, 3:23:00	BDL	01:34:00	22:21:00	01:17:00	00:41:00	01:19:00	02:17:00	URM1	EDJ2	Buccal	2 days, 5:27:00
30 days, 8:31:00	117 days, 21:13:00	1 day, 23:39:00	05:37:00	6 days, 7:00:00	11 days, 23:38:00	BDL	2 days, 4:37:00	BDL	01:33:00	23:47:00	01:16:00	00:41:00	01:18:00	02:20:00	URM1	EDJ2	Buccal	2 days, 6:15:00
30 days, 16:37:00	114 days, 20:04:00	2 days, 2:02:00	05:34:00	5 days, 20:32:00	11 days, 15:56:00	BDL	2 days, 1:00:00	00:04:00	01:42:00	21:53:00	01:14:00	00:38:00	01:16:00	02:11:00	URM1	EDJ2	Buccal	2 days, 6:23:00
31 days, 0:04:00	118 days, 15:11:00	1 day, 23:25:00	05:04:00	6 days, 1:03:00	11 days, 22:26:00	BDL	2 days, 4:39:00	BDL	01:01:00	23:01:00	01:17:00	00:39:00	01:17:00	02:22:00	URM1	EDJ2	Buccal	2 days, 7:10:00
31 days, 7:31:00	119 days, 1:04:00	2 days, 4:09:00	05:33:00	6 days, 10:29:00	12 days, 1:24:00	BDL	2 days, 4:12:00	BDL	01:34:00	23:11:00	01:17:00	00:42:00	01:18:00	02:20:00	URM1	EDJ2	Buccal	2 days, 7:19:00
31 days, 15:37:00	120 days, 8:34:00	2 days, 3:33:00	05:37:00	5 days, 19:37:00	11 days, 14:40:00	BDL	2 days, 2:15:00	BDL	01:27:00	22:35:00	01:18:00	00:38:00	01:15:00	02:16:00	URM1	EDJ2	Buccal	2 days, 8:07:00
31 days, 23:04:00	111 days, 23:27:00	2 days, 0:06:00	05:09:00	5 days, 23:35:00	12 days, 3:28:00	BDL	2 days, 2:02:00	BDL	01:21:00	22:07:00	01:13:00	00:39:00	01:19:00	02:14:00	URM1	EDJ2	Buccal	2 days, 8:15:00
32 days, 6:31:00	119 days, 14:12:00	1 day, 23:07:00	05:44:00	5 days, 16:24:00	11 days, 18:16:00	BDL	2 days, 3:25:00	BDL	01:09:00	22:22:00	01:18:00	00:37:00	01:16:00	02:19:00	URM1	EDJ2	Buccal	2 days, 9:03:00
32 days, 14:37:00	120 days, 2:08:00	2 days, 4:45:00	05:02:00	6 days, 1:36:00	11 days, 23:53:00	BDL	2 days, 5:02:00	BDL	01:51:00	21:32:00	01:18:00	00:39:00	01:18:00	02:22:00	URM1	EDJ2	Buccal	2 days, 9:11:00
32 days, 22:04:00	123 days, 1:13:00	2 days, 5:03:00	05:37:00	8 days, 0:25:00	12 days, 6:17:00	BDL	2 days, 7:10:00	BDL	01:34:00	22:22:00	01:20:00	00:52:00	01:19:00	02:29:00	URM1	EDJ2	Buccal	2 days, 10:00:00
33 days, 5:30:00	117 days, 12:35:00	2 days, 1:36:00	04:54:00	6 days, 2:22:00	11 days, 19:24:00	BDL	2 days, 5:36:00	BDL	01:27:00	22:21:00	01:16:00	00:39:00	01:16:00	02:23:00	URM1	EDJ2	Buccal	2 days, 10:08:00
33 days, 13:37:00	116 days, 13:52:00	2 days, 1:47:00	05:28:00	5 days, 20:23:00	12 days, 0:17:00	BDL	2 days, 2:05:00	BDL	01:36:00	22:44:00	01:16:00	00:38:00	01:18:00	02:15:00	URM1	EDJ2	Buccal	2 days, 10:57:00
33 days, 21:04:00	118 days, 1:42:00	2 days, 8:08:00	05:08:00	6 days, 2:52:00	12 days, 2:17:00	BDL	2 days, 4:17:00	BDL	01:44:00	22:32:00	01:17:00	00:40:00	01:18:00	02:21:00	URM1	EDJ2	Buccal	2 days, 11:05:00
34 days, 4:30:00	118 days, 21:37:00	2 days, 3:14:00	05:31:00	5 days, 19:17:00	12 days, 5:11:00	BDL	2 days, 8:07:00	BDL	01:34:00	22:59:00	01:17:00	00:38:00	01:19:00	02:30:00	URM1	EDJ2	Buccal	2 days, 11:54:00
34 days, 12:38:00	114 days, 9:05:00	2 days, 3:16:00	05:01:00	5 days, 20:14:00	11 days, 22:25:00	BDL	2 days, 5:03:00	BDL	01:36:00	23:07:00	01:14:00	00:38:00	01:17:00	02:22:00	URM1	EDJ2	Buccal	2 days, 12:02:00
34 days, 20:04:00	119 days, 11:01:00	2 days, 6:00:00	05:35:00	5 days, 14:17:00	12 days, 4:55:00	BDL	2 days, 6:44:00	BDL	01:21:00	23:23:00	01:17:00	00:36:00	01:19:00	02:27:00	URM1	EDJ2	Buccal	2 days, 12:49:00
35 days, 3:31:00	117 days, 5:34:00	2 days, 6:13:00	05:19:00	5 days, 15:16:00	11 days, 20:06:00	BDL	2 days, 7:12:00	BDL	01:47:00	23:18:00	01:16:00	00:37:00	01:17:00	02:29:00	URM1	EDJ2	Buccal	2 days, 13:35:00
35 days, 11:37:00	126 days, 5:26:00	2 days, 12:03:00	05:43:00	6 days, 13:21:00	12 days, 12:39:00	BDL	2 days, 11:05:00	BDL	01:58:00	23:57:00	01:22:00	00:42:00	01:21:00	02:39:00	URM1	EDJ2	Buccal	2 days, 13:41:00
35 days, 19:04:00	112 days, 5:25:00	2 days, 5:31:00	05:09:00	6 days, 8:08:00	11 days, 18:01:00	BDL	2 days, 7:16:00	BDL	02:01:00	22:33:00	01:13:00	00:41:00	01:16:00	02:28:00	URM1	EDJ2	Buccal	2 days, 14:25:00
36 days, 2:30:00	117 days, 21:41:00	2 days, 4:56:00	05:52:00	6 days, 12:51:00	11 days, 21:02:00	BDL	2 days, 11:25:00	BDL	01:58:00	23:18:00	01:16:00	00:42:00	01:17:00	02:39:00	URM1	EDJ2	Buccal	2 days, 14:29:00
36 days, 10:37:00	122 days, 19:04:00	2 days, 8:02:00	05:39:00	6 days, 12:29:00	12 days, 10:17:00	BDL	2 days, 12:05:00	BDL	01:59:00	1 day, 1:08:00	01:20:00	00:42:00	01:21:00	02:41:00	URM1	EDJ2	Buccal	2 days, 15:12:00
36 days, 18:04:00	118 days, 11:20:00	2 days, 4:25:00	05:53:00	6 days, 4:32:00	12 days, 4:02:00	BDL	2 days, 12:08:00	BDL	02:10:00	1 day, 1:27:00	01:17:00	00:40:00	01:19:00	02:42:00	URM1	EDJ2	Buccal	2 days, 15:15:00
37 days, 1:31:00	125 days, 23:19:00	2 days, 7:52:00	06:10:00	5 days, 19:19:00	12 days, 8:59:00	BDL	2 days, 7:49:00	BDL	01:32:00	1 day, 0:02:00	01:22:00	00:38:00	01:20:00	02:30:00	URM1	EDJ2	Buccal	2 days, 15:57:00
37 days, 9:37:00	117 days, 3:14:00	2 days, 5:47:00	05:58:00	6 days, 12:13:00	12 days, 6:38:00	BDL	2 days, 9:39:00	BDL	01:13:00	1 day, 0:22:00	01:16:00	00:42:00	01:20:00	02:35:00	URM1	EDJ2	Buccal	2 days, 16:38:00
37 days, 17:04:00	119 days, 3:39:00	2 days, 7:45:00	06:42:00	5 days, 17:18:00	12 days, 2:24:00	BDL	2 days, 7:32:00	BDL	01:35:00	1 day, 0:07:00	01:17:00	00:37:00	01:18:00	02:28:00	URM1	EDJ2	Buccal	2 days, 16:39:00
38 days, 0:30:00	119 days, 1:20:00	2 days, 6:13:00	07:02:00	5 days, 23:25:00	12 days, 5:13:00	BDL	2 days, 8:37:00	BDL	01:39:00	1 day, 0:05:00	01:17:00	00:39:00	01:19:00	02:31:00	URM1	EDJ2	Buccal	2 days, 17:19:00
38 days, 8:37:00	113 days, 21:35:00	2 days, 5:09:00	06:18:00	5 days, 19:27:00	12 days, 1:20:00	BDL	2 days, 8:03:00	BDL	01:27:00	23:13:00	01:14:00	00:38:00	01:18:00	02:31:00	URM1	EDJ2	Buccal	2 days, 17:18:00
38 days, 16:03:00	120 days, 16:41:00	2 days, 8:39:00	06:31:00	5 days, 14:41:00	12 days, 2:23:00	BDL	2 days, 9:33:00	BDL	01:55:00	23:23:00	01:18:00	00:36:00	01:18:00	02:35:00	URM1	EDJ2	Buccal	2 days, 17:57:00
38 days, 23:30:00	115 days, 13:20:00	2 days, 6:25:00	06:12:00	5 days, 20:41:00	12 days, 1:24:00	BDL	2 days, 8:31:00	BDL	01:09:00	1 day, 0:24:00	01:15:00	00:38:00	01:18:00	02:31:00	URM1	EDJ2	Buccal	2 days, 18:35:00
39 days, 7:37:00	118 days, 9:22:00	2 days, 6:09:00	06:00:00	5 days, 14:25:00	12 days, 11:02:00	BDL	2 days, 7:08:00	00:04:00	01:52:00	1 day, 0:32:00	01:17:00	00:36:00	01:21:00	02:29:00	URM1	EDJ2	Buccal	2 days, 18:33:00
39 days, 15:03:00	117 days, 15:02:00	2 days, 4:48:00	06:33:00	5 days, 15:53:00	12 days, 1:28:00	BDL	2 days, 8:08:00	BDL	01:24:00	1 day, 0:33:00	01:16:00	00:37:00	01:18:00	02:30:00	URM1	EDJ2	Buccal	2 days, 19:10:00
39 days, 22:30:00	113 days, 0:25:00	2 days, 4:50:00	07:12:00	5 days, 19:33:00	12 days, 3:08:00	BDL	2 days, 6:01:00	BDL	02:02:00	23:59:00	01:13:00	00:38:00	01:19:00	02:26:00	URM1	EDJ2	Buccal	2 days, 19:07:00
40 days, 6:37:00	117 days, 21:23:00	2 days, 7:01:00	08:37:00	5 days, 8:18:00	12 days, 6:27:00	BDL	2 days, 7:53:00	BDL	01:22:00	1 day, 0:36:00	01:16:00	00:35:00	01:19:00	02:30:00	URM1	EDJ2	Buccal	2 days, 19:43:00
40 days, 14:03:00	112 days, 1:04:00	2 days, 2:23:00	08:35:00	5 days, 12:39:00	11 days, 22:14:00	BDL	2 days, 7:39:00	BDL	01:52:00	1 day, 1:25:00	01:13:00	00:36:00	01:17:00	02:29:00	URM1	EDJ2	Buccal	2 days, 20:20:00
40 days, 21:30:00	117 days, 7:22:00	2 days, 1:22:00	10:16:00	5 days, 12:48:00	12 days, 2:01:00	BDL	2 days, 8:34:00	BDL	01:18:00	23:59:00	01:16:00	00:36:00	01:18:00	02:31:00	URM1	EDJ2	Buccal	2 days, 20:15:00
41 days, 5:37:00	111 days, 17:10:00	1 day, 23:44:00	11:27:00	5 days, 19:25:00	11 days, 17:48:00	BDL	2 days, 5:08:00	BDL	01:41:00	23:23:00	01:12:00	00:38:00	01:16:00	02:23:00	URM1	EDJ2	Buccal	2 days, 20:50:00
41 days, 13:03:00	113 days, 0:57:00	2 days, 4:04:00	12:36:00	5 days, 12:31:00	12 days, 8:02:00	BDL	2 days, 6:51:00	BDL	01:07:00	23:32:00	01:13:00	00:36:00	01:20:00	02:27:00	URM1	EDJ2	Buccal	2 days, 21:25:00
41 days, 20:30:00	112 days, 1:23:00	2 days, 3:37:00	15:33:00	5 days, 17:17:00	11 days, 15:51:00	BDL	2 days, 7:08:00	BDL	01:49:00	23:23:00	01:13:00	00:37:00	01:16:00	02:29:00	URM1	EDJ2	Buccal	2 days, 21:20:00
42 days, 4:36:00	120 days, 7:55:00	2 days, 2:34:00	16:55:00	5 days, 22:22:00	12 days, 0:46:00	BDL	2 days, 8:54:00	BDL	01:59:00	1 day, 1:08:00	01:18:00	00:38:00	01:18:00	02:33:00	URM1	EDJ2	Buccal	2 days, 21:54:00
42 days, 12:04:00	110 days, 20:30:00	2 days, 4:48:00	19:08:00	5 days, 19:15:00	12 days, 0:03:00	BDL	2 days, 7:08:00	BDL	02:02:00	1 day, 1:16:00	01:12:00	00:38:00	01:18:00	02:28:00	URM1	EDJ2	Buccal	2 days, 22:29:00
42 days, 19:30:00	113 days, 8:49:00	2 days, 4:04:00	10 days, 6:03:00	5 days, 14:42:00	11 days, 23:10:00	BDL	3 days, 13:50:00	BDL	02:19:00	1 day, 1:54:00	01:14:00	00:36:00	01:17:00	03:51:00	URM1	EDJ2	Buccal	2 days, 22:22:00
43 days, 3:37:00	112 days, 21:30:00	2 days, 7:00:00	59 days, 10:55:00	5 days, 11:24:00	12 days, 0:25:00	BDL	2 days, 18:51:00	BDL	01:35:00	1 day, 1:03:00	01:13:00	00:35:00	01:18:00	03:00:00	URM1	EDJ2	Buccal	2 days, 22:56:00
43 days, 11:03:00	110 days, 19:12:00	2 days, 1:36:00	1 day, 12:34:00	5 days, 22:29:00	12 days, 9:03:00	00:07:00	2 days, 11:12:00	BDL	01:53:00	1 day, 1:26:00	01:12:00	00:38:00	01:20:00	02:39:00	URM1	EDJ2	Buccal	2 days, 23:30:00
43 days, 18:30:00	109 days, 10:11:00	2 days, 4:19:00	20:49:00	5 days, 16:53:00	12 days, 7:07:00	BDL	2 days, 9:04:00	BDL	01:48:00	1 day, 1:09:00	01:11:00	00:37:00	01:20:00	02:34:00	URM1	EDJ2	Buccal	2 days, 23:23:00
44 days, 2:36:00	117 days, 23:25:00	2 days, 2:40:00	14:18:00	5 days, 21:47:00	12 days, 7:36:00	BDL	2 days, 10:19:00	00:05:00	01:46:00	1 day, 2:20:00	01:17:00	00:38:00	01:20:00	02:37:00	URM1	EDJ2	Buccal	2 days, 23:56:00
44 days, 10:03:00	113 days, 15:17:00	2 days, 4:22:00	11:41:00	6 days, 0:54:00	12 days, 13:06:00	BDL	2 days, 9:11:00	BDL	01:43:00	1 day, 3:15:00	01:14:00	00:39:00	01:21:00	02:33:00	URM1	EDJ2	Buccal	3 days, 0:29:00
44 days, 17:30:00	116 days, 20:38:00	2 days, 1:06:00	10:40:00	6 days, 0:34:00	12 days, 7:30:00	00:07:00	2 days, 9:20:00	00:11:00	01:36:00	1 day, 1:08:00	01:16:00	00:39:00	01:20:00	02:35:00	URM1	EDJ2	Buccal	3 days, 0:22:00
45 days, 1:36:00	119 days, 5:47:00	2 days, 1:00:00	09:32:00	5 days, 20:17:00	12 days, 12:21:00	BDL	2 days, 11:17:00	00:09:00	02:01:00	1 day, 1:58:00	01:17:00	00:38:00	01:21:00	02:39:00	URM1	EDJ2	Buccal	3 days, 0:55:00
45 days, 9:03:00	116 days, 10:02:00	2 days, 4:30:00	08:11:00	5 days, 21:47:00	12 days, 5:16:00	BDL	2 days, 9:11:00	BDL	01:44:00	1 day, 1:28:00	01:16:00	00:38:00	01:19:00	02:33:00	URM1	EDJ2	Buccal	3 days, 1:28:00
45 days, 16:30:00	114 days, 14:47:00	2 days, 4:17:00	07:33:00	6 days, 3:03:00	12 days, 1:01:00	BDL	2 days, 7:30:00	BDL	01:57:00	1 day, 1:21:00	01:14:00	00:40:00	01:18:00	02:29:00	URM1	EDJ2	Buccal	3 days, 1:21:00
46 days, 0:36:00	115 days, 4:45:00	2 days, 3:31:00	08:07:00	5 days, 22:15:00	14 days, 6:03:00	BDL	2 days, 17:17:00	BDL	01:31:00	1 day, 1:15:00	01:15:00	00:38:00	01:32:00	02:55:00	URM1	EDJ2	Buccal	3 days, 1:54:00
46 days, 8:03:00	112 days, 18:08:00	2 days, 4:13:00	07:51:00	5 days, 19:03:00	12 days, 8:02:00	BDL	2 days, 6:54:00	BDL	01:14:00	1 day, 0:56:00	01:13:00	00:38:00	01:20:00	02:27:00	URM1	EDJ2	Buccal	3 days, 2:27:00
46 days, 15:29:00	111 days, 6:04:00	2 days, 4:11:00	07:39:00	5 days, 21:54:00	11 days, 17:34:00	BDL	2 days, 5:47:00	BDL	01:13:00	1 day, 0:11:00	01:12:00	00:38:00	01:16:00	02:25:00	URM1	EDJ2	Buccal	3 days, 2:20:00
46 days, 23:36:00	113 days, 23:14:00	2 days, 5:24:00	06:08:00	5 days, 15:25:00	12 days, 10:48:00	00:08:00	2 days, 6:31:00	BDL	01:38:00	1 day, 0:25:00	01:14:00	00:37:00	01:21:00	02:27:00	URM1	EDJ2	Buccal	3 days, 2:53:00
47 days, 7:03:00	109 days, 23:42:00	2 days, 3:01:00	06:34:00	5 days, 13:23:00	12 days, 2:21:00	BDL	2 days, 6:34:00	BDL	01:19:00	23:48:00	01:11:00	00:36:00	01:18:00	02:27:00	URM1	EDJ2	Buccal	3 days, 3:26:00
47 days, 14:29:00	114 days, 7:25:00	1 day, 23:35:00	07:04:00	5 days, 20:36:00	12 days, 5:36:00	00:08:00	2 days, 6:08:00	BDL	01:20:00	23:17:00	01:14:00	00:38:00	01:19:00	02:25:00	URM1	EDJ2	Buccal	3 days, 3:19:00
47 days, 22:37:00	110 days, 17:30:00	2 days, 2:06:00	06:04:00	5 days, 12:02:00	11 days, 17:13:00	BDL	2 days, 9:33:00	BDL	01:39:00	1 day, 0:25:00	01:12:00	00:36:00	01:16:00	02:35:00	URM1	EDJ2	Buccal	3 days, 3:53:00
48 days, 6:03:00	112 days, 12:09:00	2 days, 7:17:00	06:12:00	5 days, 14:31:00	12 days, 9:34:00	BDL	2 days, 9:38:00	BDL	01:27:00	1 day, 1:11:00	01:13:00	00:36:00	01:20:00	02:35:00	URM1	EDJ2	Buccal	3 days, 4:26:00
48 days, 13:30:00	112 days, 21:38:00	2 days, 4:22:00	06:38:00	5 days, 9:27:00	12 days, 2:06:00	BDL	2 days, 8:47:00	BDL	01:41:00	1 day, 0:50:00	01:13:00	00:35:00	01:18:00	02:33:00	URM1	EDJ2	Buccal	3 days, 4:20:00
48 days, 21:36:00	111 days, 5:52:00	2 days, 3:52:00	05:09:00	6 days, 0:09:00	12 days, 0:05:00	BDL	2 days, 7:05:00	BDL	01:37:00	1 day, 1:11:00	01:12:00	00:39:00	01:18:00	02:29:00	URM1	EDJ2	Buccal	3 days, 4:54:00
49 days, 5:03:00	115 days, 16:26:00	2 days, 4:38:00	06:25:00	5 days, 19:20:00	12 days, 16:32:00	BDL	2 days, 10:05:00	BDL	02:10:00	1 day, 1:21:00	01:15:00	00:38:00	01:22:00	02:36:00	URM1	EDJ2	Buccal	3 days, 5:29:00
49 days, 12:29:00	113 days, 7:11:00	2 days, 6:34:00	06:25:00	5 days, 15:49:00	12 days, 17:52:00	BDL	2 days, 8:45:00	BDL	01:39:00	1 day, 1:21:00	01:13:00	00:37:00	01:23:00	02:33:00	URM1	EDJ2	Buccal	3 days, 5:23:00
49 days, 20:36:00	108 days, 17:05:00	2 days, 4:04:00	05:54:00	5 days, 17:47:00	12 days, 9:43:00	BDL	2 days, 8:44:00	BDL	01:20:00	1 day, 1:17:00	01:11:00	00:37:00	01:20:00	02:33:00	URM1	EDJ2	Buccal	3 days, 5:58:00
50 days, 4:03:00	108 days, 5:49:00	2 days, 0:15:00	06:36:00	5 days, 12:52:00	11 days, 16:04:00	BDL	2 days, 6:59:00	BDL	01:24:00	1 day, 1:39:00	01:10:00	00:36:00	01:16:00	02:28:00	URM1	EDJ2	Buccal	3 days, 6:33:00
50 days, 11:30:00	114 days, 7:19:00	2 days, 5:04:00	06:26:00	5 days, 14:24:00	12 days, 5:18:00	BDL	2 days, 10:29:00	BDL	01:14:00	1 day, 0:14:00	01:14:00	00:36:00	01:19:00	02:38:00	URM1	EDJ2	Buccal	3 days, 6:29:00
50 days, 19:36:00	111 days, 2:31:00	2 days, 7:10:00	06:33:00	6 days, 2:13:00	12 days, 5:08:00	BDL	2 days, 8:38:00	BDL	01:08:00	1 day, 0:07:00	01:12:00	00:39:00	01:19:00	02:31:00	URM1	EDJ2	Buccal	3 days, 7:05:00
51 days, 3:03:00	106 days, 10:09:00	2 days, 2:18:00	05:39:00	5 days, 18:08:00	12 days, 6:01:00	BDL	2 days, 7:52:00	BDL	01:36:00	23:37:00	01:09:00	00:37:00	01:19:00	02:30:00	URM1	EDJ2	Buccal	3 days, 7:01:00
51 days, 10:29:00	110 days, 7:36:00	2 days, 1:50:00	05:54:00	5 days, 18:49:00	12 days, 2:52:00	BDL	2 days, 11:57:00	BDL	01:14:00	23:12:00	01:12:00	00:37:00	01:19:00	02:41:00	URM1	EDJ2	Buccal	3 days, 7:38:00
51 days, 18:36:00	124 days, 5:14:00	2 days, 3:31:00	06:38:00	5 days, 11:30:00	12 days, 3:14:00	BDL	2 days, 8:03:00	BDL	01:39:00	23:01:00	01:21:00	00:35:00	01:19:00	02:31:00	URM1	EDJ2	Buccal	3 days, 8:15:00
52 days, 2:02:00	113 days, 1:02:00	2 days, 2:22:00	05:42:00	5 days, 14:10:00	12 days, 7:46:00	BDL	2 days, 12:05:00	BDL	01:01:00	1 day, 0:18:00	01:13:00	00:36:00	01:20:00	02:41:00	URM1	EDJ2	Buccal	3 days, 8:13:00
52 days, 9:29:00	114 days, 17:57:00	2 days, 2:51:00	06:12:00	5 days, 15:21:00	12 days, 8:22:00	BDL	2 days, 11:07:00	BDL	01:05:00	1 day, 0:59:00	01:14:00	00:37:00	01:20:00	02:39:00	URM1	EDJ2	Buccal	3 days, 8:51:00
52 days, 17:36:00	110 days, 21:16:00	2 days, 2:19:00	07:06:00	5 days, 20:36:00	12 days, 8:40:00	BDL	2 days, 7:21:00	BDL	01:00:00	23:11:00	01:12:00	00:38:00	01:20:00	02:29:00	URM1	EDJ2	Buccal	3 days, 9:30:00
53 days, 1:02:00	128 days, 18:23:00	2 days, 1:34:00	06:44:00	5 days, 12:21:00	11 days, 23:50:00	BDL	2 days, 8:23:00	BDL	01:41:00	1 day, 0:12:00	01:24:00	00:36:00	01:18:00	02:32:00	URM1	EDJ2	Buccal	3 days, 9:29:00
53 days, 8:29:00	108 days, 23:11:00	2 days, 3:26:00	06:02:00	5 days, 9:33:00	12 days, 2:27:00	BDL	2 days, 7:48:00	BDL	01:24:00	23:42:00	01:11:00	00:35:00	01:18:00	02:30:00	URM1	EDJ2	Buccal	3 days, 10:09:00
53 days, 16:36:00	108 days, 3:27:00	1 day, 22:29:00	06:05:00	5 days, 11:46:00	11 days, 18:14:00	00:09:00	2 days, 5:42:00	BDL	01:15:00	23:19:00	01:10:00	00:36:00	01:16:00	02:24:00	URM1	EDJ2	Buccal	3 days, 10:10:00
54 days, 0:03:00	106 days, 21:34:00	2 days, 3:47:00	06:39:00	5 days, 16:02:00	11 days, 19:06:00	BDL	2 days, 7:04:00	BDL	01:20:00	22:52:00	01:09:00	00:37:00	01:17:00	02:29:00	URM1	EDJ2	Buccal	3 days, 10:51:00
54 days, 7:29:00	109 days, 1:33:00	2 days, 7:18:00	05:51:00	5 days, 4:20:00	11 days, 20:49:00	BDL	2 days, 8:31:00	BDL	01:18:00	23:46:00	01:11:00	00:33:00	01:17:00	02:31:00	URM1	EDJ2	Buccal	3 days, 11:32:00
54 days, 15:36:00	106 days, 17:22:00	2 days, 4:10:00	05:16:00	5 days, 21:54:00	12 days, 2:27:00	BDL	2 days, 10:29:00	BDL	01:14:00	1 day, 0:00:00	01:09:00	00:38:00	01:18:00	02:38:00	URM1	EDJ2	Buccal	3 days, 11:35:00
54 days, 23:02:00	111 days, 18:09:00	2 days, 5:19:00	05:30:00	5 days, 16:07:00	11 days, 19:19:00	BDL	2 days, 8:25:00	BDL	01:40:00	23:17:00	01:12:00	00:37:00	01:17:00	02:32:00	URM1	EDJ2	Buccal	3 days, 12:18:00
55 days, 6:29:00	109 days, 19:41:00	2 days, 6:36:00	07:03:00	5 days, 17:28:00	11 days, 21:37:00	BDL	2 days, 7:26:00	BDL	01:08:00	23:00:00	01:11:00	00:37:00	01:17:00	02:28:00	URM1	EDJ2	Buccal	3 days, 12:22:00
55 days, 14:35:00	111 days, 21:02:00	2 days, 8:27:00	06:04:00	4 days, 20:15:00	12 days, 3:51:00	BDL	2 days, 7:55:00	00:14:00	01:17:00	1 day, 1:00:00	01:13:00	00:31:00	01:19:00	02:30:00	URM1	EDJ2	Buccal	3 days, 13:06:00
55 days, 22:03:00	108 days, 23:14:00	2 days, 5:07:00	05:18:00	4 days, 20:54:00	12 days, 7:29:00	BDL	2 days, 10:29:00	BDL	01:17:00	1 day, 2:31:00	01:11:00	00:31:00	01:20:00	02:36:00	URM1	EDJ2	Buccal	3 days, 13:12:00
56 days, 5:29:00	111 days, 7:05:00	2 days, 6:02:00	06:08:00	6 days, 4:21:00	12 days, 16:34:00	BDL	2 days, 12:56:00	BDL	01:02:00	1 day, 3:00:00	01:12:00	00:40:00	01:22:00	02:44:00	URM1	EDJ2	Buccal	3 days, 13:58:00
56 days, 13:36:00	115 days, 11:11:00	1 day, 23:42:00	06:06:00	6 days, 15:32:00	12 days, 16:29:00	BDL	2 days, 12:10:00	BDL	02:27:00	1 day, 1:34:00	01:15:00	00:43:00	01:22:00	02:42:00	URM1	EDJ2	Buccal	3 days, 14:05:00
56 days, 21:02:00	106 days, 10:10:00	2 days, 4:27:00	06:32:00	5 days, 22:24:00	12 days, 6:11:00	BDL	2 days, 11:00:00	BDL	01:47:00	1 day, 1:07:00	01:09:00	00:38:00	01:19:00	02:39:00	URM1	EDJ2	Buccal	3 days, 14:53:00
57 days, 4:29:00	111 days, 2:35:00	2 days, 5:01:00	05:51:00	5 days, 19:03:00	12 days, 6:28:00	BDL	2 days, 9:29:00	BDL	01:33:00	23:56:00	01:12:00	00:38:00	01:20:00	02:35:00	URM1	EDJ2	Buccal	3 days, 15:01:00
57 days, 12:35:00	112 days, 1:12:00	2 days, 4:05:00	05:37:00	6 days, 0:29:00	12 days, 6:03:00	BDL	2 days, 11:23:00	BDL	01:11:00	1 day, 1:13:00	01:13:00	00:39:00	01:19:00	02:40:00	URM1	EDJ2	Buccal	3 days, 15:51:00
57 days, 20:02:00	115 days, 5:01:00	2 days, 6:25:00	05:05:00	5 days, 16:50:00	11 days, 21:14:00	BDL	2 days, 10:44:00	BDL	01:47:00	1 day, 0:20:00	01:15:00	00:37:00	01:17:00	02:38:00	URM1	EDJ2	Buccal	3 days, 16:01:00
58 days, 3:29:00	168 days, 10:31:00	2 days, 5:37:00	05:48:00	5 days, 14:25:00	12 days, 6:00:00	BDL	2 days, 10:25:00	BDL	01:20:00	1 day, 0:14:00	01:49:00	00:36:00	01:19:00	02:36:00	URM1	EDJ2	Buccal	3 days, 16:53:00
58 days, 11:35:00	116 days, 5:28:00	2 days, 6:32:00	06:22:00	5 days, 12:37:00	12 days, 10:16:00	BDL	2 days, 10:29:00	BDL	01:37:00	1 day, 1:32:00	01:15:00	00:36:00	01:21:00	02:38:00	URM1	EDJ2	Buccal	3 days, 17:05:00
58 days, 19:02:00	117 days, 0:23:00	2 days, 0:56:00	06:03:00	5 days, 16:25:00	12 days, 7:07:00	BDL	2 days, 12:11:00	BDL	01:14:00	1 day, 0:19:00	01:16:00	00:37:00	01:20:00	02:42:00	URM1	EDJ2	Buccal	3 days, 17:58:00
59 days, 2:29:00	111 days, 5:57:00	2 days, 4:00:00	07:47:00	5 days, 10:18:00	12 days, 5:23:00	BDL	2 days, 8:07:00	BDL	01:11:00	1 day, 1:18:00	01:12:00	00:35:00	01:19:00	02:30:00	URM1	EDJ2	Buccal	3 days, 18:13:00
59 days, 10:35:00	119 days, 6:29:00	2 days, 3:18:00	06:39:00	5 days, 14:11:00	11 days, 8:06:00	BDL	2 days, 6:22:00	BDL	01:32:00	22:22:00	01:17:00	00:36:00	01:13:00	02:25:00	URM1	EDJ2	Buccal	3 days, 19:08:00
59 days, 18:02:00	113 days, 20:44:00	2 days, 2:14:00	06:12:00	5 days, 13:36:00	12 days, 8:49:00	BDL	2 days, 8:01:00	BDL	01:39:00	1 day, 1:37:00	01:14:00	00:36:00	01:20:00	02:31:00	URM1	EDJ2	Buccal	3 days, 19:24:00
60 days, 1:28:00	106 days, 8:20:00	2 days, 3:17:00	07:05:00	5 days, 5:20:00	11 days, 10:14:00	BDL	2 days, 9:06:00	BDL	02:17:00	23:24:00	01:09:00	00:34:00	01:14:00	02:33:00	URM1	EDJ2	Buccal	3 days, 20:22:00
60 days, 9:35:00	108 days, 5:10:00	2 days, 2:32:00	05:21:00	5 days, 18:44:00	11 days, 17:02:00	BDL	2 days, 6:20:00	BDL	01:20:00	1 day, 0:52:00	01:10:00	00:37:00	01:16:00	02:26:00	URM1	EDJ2	Buccal	3 days, 20:41:00
60 days, 17:02:00	108 days, 9:51:00	2 days, 3:51:00	06:06:00	6 days, 6:20:00	12 days, 0:13:00	BDL	2 days, 15:16:00	BDL	01:10:00	1 day, 4:09:00	01:10:00	00:40:00	01:18:00	02:50:00	URM1	EDJ2	Buccal	3 days, 21:00:00
61 days, 0:28:00	104 days, 7:27:00	1 day, 22:16:00	05:20:00	5 days, 5:17:00	11 days, 10:07:00	BDL	2 days, 8:57:00	BDL	01:46:00	1 day, 0:10:00	01:08:00	00:34:00	01:14:00	02:33:00	URM1	EDJ2	Buccal	3 days, 22:01:00
61 days, 8:36:00	111 days, 4:36:00	2 days, 3:02:00	06:18:00	5 days, 6:28:00	12 days, 4:53:00	BDL	2 days, 8:28:00	BDL	01:32:00	1 day, 0:16:00	01:12:00	00:34:00	01:19:00	02:32:00	URM1	EDJ2	Buccal	3 days, 22:23:00
61 days, 16:02:00	111 days, 16:22:00	1 day, 23:15:00	06:26:00	5 days, 5:26:00	11 days, 15:22:00	BDL	2 days, 5:48:00	BDL	01:32:00	23:00:00	01:12:00	00:34:00	01:15:00	02:25:00	URM1	EDJ2	Buccal	3 days, 23:26:00
61 days, 23:29:00	108 days, 22:34:00	2 days, 3:31:00	06:12:00	5 days, 14:36:00	12 days, 6:52:00	BDL	2 days, 8:15:00	BDL	01:07:00	1 day, 1:05:00	01:11:00	00:36:00	01:20:00	02:31:00	URM1	EDJ2	Buccal	3 days, 23:50:00
62 days, 7:35:00	108 days, 12:24:00	1 day, 22:07:00	06:44:00	5 days, 10:27:00	12 days, 11:05:00	BDL	2 days, 8:35:00	BDL	01:25:00	1 day, 0:03:00	01:10:00	00:35:00	01:21:00	02:31:00	URM1	EDJ2	Buccal	4 days, 0:13:00
62 days, 15:02:00	107 days, 19:12:00	2 days, 2:32:00	05:44:00	5 days, 10:17:00	11 days, 23:30:00	BDL	2 days, 6:14:00	BDL	01:03:00	1 day, 0:07:00	01:10:00	00:35:00	01:18:00	02:26:00	URM1	EDJ2	Buccal	4 days, 1:17:00
62 days, 22:28:00	102 days, 13:55:00	2 days, 1:33:00	08:13:00	5 days, 7:21:00	11 days, 14:37:00	BDL	2 days, 7:07:00	BDL	01:01:00	22:43:00	01:07:00	00:34:00	01:15:00	02:28:00	URM1	EDJ2	Buccal	4 days, 1:42:00
63 days, 6:35:00	111 days, 9:34:00	2 days, 4:57:00	06:07:00	5 days, 1:37:00	12 days, 0:09:00	BDL	2 days, 9:12:00	00:32:00	01:40:00	1 day, 1:05:00	01:12:00	00:33:00	01:18:00	02:34:00	URM1	EDJ2	Buccal	4 days, 2:06:00
63 days, 14:02:00	113 days, 11:32:00	2 days, 2:43:00	05:21:00	5 days, 5:18:00	11 days, 21:32:00	BDL	2 days, 8:27:00	00:19:00	01:34:00	1 day, 0:11:00	01:14:00	00:34:00	01:17:00	02:32:00	URM1	EDJ2	Buccal	4 days, 3:11:00
63 days, 21:29:00	109 days, 15:57:00	2 days, 0:22:00	06:42:00	5 days, 4:14:00	11 days, 21:29:00	BDL	2 days, 9:07:00	BDL	01:42:00	22:20:00	01:11:00	00:34:00	01:17:00	02:33:00	URM1	EDJ2	Buccal	4 days, 3:36:00
64 days, 5:35:00	110 days, 9:30:00	2 days, 1:29:00	06:04:00	5 days, 1:08:00	11 days, 17:04:00	BDL	2 days, 7:31:00	BDL	01:04:00	23:33:00	01:12:00	00:33:00	01:16:00	02:29:00	URM1	EDJ2	Buccal	4 days, 4:02:00
64 days, 13:02:00	107 days, 18:22:00	2 days, 3:56:00	05:08:00	5 days, 11:23:00	11 days, 18:32:00	BDL	2 days, 9:21:00	BDL	01:48:00	22:31:00	01:10:00	00:35:00	01:16:00	02:34:00	URM1	EDJ2	Buccal	4 days, 5:08:00
64 days, 20:28:00	111 days, 21:41:00	2 days, 6:54:00	06:26:00	5 days, 10:35:00	12 days, 3:21:00	BDL	2 days, 9:58:00	BDL	01:42:00	23:49:00	01:13:00	00:35:00	01:19:00	02:36:00	URM1	EDJ2	Buccal	4 days, 5:35:00
65 days, 4:35:00	122 days, 19:52:00	2 days, 7:36:00	05:59:00	5 days, 15:12:00	11 days, 22:13:00	BDL	2 days, 8:42:00	BDL	02:02:00	1 day, 0:16:00	01:20:00	00:36:00	01:17:00	02:32:00	URM1	EDJ2	Buccal	4 days, 6:01:00
65 days, 12:01:00	120 days, 2:46:00	2 days, 2:30:00	05:52:00	5 days, 16:17:00	11 days, 21:21:00	BDL	2 days, 8:16:00	BDL	01:17:00	23:33:00	01:18:00	00:37:00	01:17:00	02:31:00	URM1	EDJ2	Buccal	4 days, 7:09:00
65 days, 19:28:00	109 days, 19:25:00	1 day, 22:23:00	05:22:00	5 days, 4:30:00	11 days, 16:09:00	BDL	2 days, 6:37:00	BDL	01:41:00	22:48:00	01:11:00	00:33:00	01:16:00	02:27:00	URM1	EDJ2	Buccal	4 days, 7:36:00
66 days, 3:35:00	112 days, 23:20:00	2 days, 5:35:00	06:18:00	5 days, 5:40:00	11 days, 22:37:00	BDL	2 days, 5:21:00	BDL	01:40:00	23:36:00	01:13:00	00:34:00	01:17:00	02:24:00	URM1	EDJ2	Buccal	4 days, 8:04:00
66 days, 11:01:00	114 days, 1:42:00	2 days, 8:20:00	06:21:00	5 days, 14:42:00	11 days, 22:15:00	BDL	2 days, 10:50:00	BDL	01:43:00	23:33:00	01:14:00	00:36:00	01:17:00	02:38:00	URM1	EDJ2	Buccal	4 days, 9:13:00
66 days, 18:28:00	116 days, 22:07:00	2 days, 7:17:00	06:20:00	5 days, 7:46:00	12 days, 10:17:00	BDL	2 days, 11:21:00	BDL	02:23:00	1 day, 0:38:00	01:16:00	00:34:00	01:21:00	02:40:00	URM1	EDJ2	Buccal	4 days, 9:42:00
67 days, 2:35:00	114 days, 20:16:00	2 days, 1:22:00	05:36:00	5 days, 10:21:00	11 days, 17:24:00	BDL	2 days, 9:17:00	BDL	01:53:00	1 day, 0:10:00	01:14:00	00:35:00	01:16:00	02:35:00	URM1	EDJ2	Buccal	4 days, 10:12:00
67 days, 10:02:00	110 days, 17:22:00	1 day, 23:33:00	06:35:00	5 days, 6:18:00	11 days, 16:14:00	BDL	2 days, 7:12:00	BDL	01:36:00	1 day, 0:05:00	01:12:00	00:34:00	01:16:00	02:29:00	URM1	EDJ2	Buccal	4 days, 11:21:00
67 days, 17:28:00	103 days, 6:02:00	2 days, 0:26:00	05:03:00	4 days, 21:25:00	11 days, 2:01:00	BDL	2 days, 5:31:00	BDL	01:16:00	23:38:00	01:07:00	00:32:00	01:12:00	02:24:00	URM1	EDJ2	Buccal	4 days, 11:52:00
68 days, 1:35:00	117 days, 5:33:00	2 days, 3:16:00	05:31:00	5 days, 14:35:00	11 days, 23:20:00	BDL	2 days, 10:29:00	BDL	02:03:00	1 day, 0:45:00	01:16:00	00:36:00	01:18:00	02:36:00	URM1	EDJ2	Buccal	4 days, 12:23:00
68 days, 9:01:00	108 days, 16:17:00	2 days, 3:49:00	06:00:00	5 days, 5:02:00	11 days, 1:10:00	BDL	2 days, 8:32:00	BDL	01:29:00	22:32:00	01:10:00	00:34:00	01:12:00	02:32:00	URM1	EDJ2	Buccal	4 days, 13:34:00
68 days, 16:28:00	117 days, 2:06:00	2 days, 7:07:00	05:06:00	5 days, 18:47:00	12 days, 5:19:00	BDL	2 days, 12:25:00	00:04:00	01:36:00	1 day, 1:37:00	01:16:00	00:37:00	01:19:00	02:43:00	URM1	EDJ2	Buccal	4 days, 14:06:00
69 days, 0:34:00	113 days, 0:05:00	2 days, 5:36:00	06:19:00	5 days, 16:23:00	12 days, 4:29:00	BDL	2 days, 12:32:00	BDL	02:16:00	1 day, 0:55:00	01:13:00	00:37:00	01:19:00	02:43:00	URM1	EDJ2	Buccal	4 days, 14:39:00
69 days, 8:02:00	115 days, 22:51:00	2 days, 6:33:00	06:05:00	5 days, 19:13:00	12 days, 7:20:00	BDL	2 days, 12:39:00	00:07:00	03:09:00	1 day, 0:37:00	01:15:00	00:38:00	01:20:00	02:42:00	URM1	EDJ2	Buccal	4 days, 15:12:00
69 days, 15:28:00	111 days, 10:04:00	2 days, 5:26:00	06:47:00	5 days, 15:29:00	11 days, 18:47:00	BDL	2 days, 10:40:00	BDL	02:01:00	1 day, 0:37:00	01:12:00	00:36:00	01:16:00	02:38:00	URM1	EDJ2	Buccal	4 days, 16:25:00
69 days, 23:35:00	109 days, 12:29:00	2 days, 8:03:00	05:49:00	5 days, 12:35:00	12 days, 4:52:00	BDL	2 days, 9:12:00	BDL	01:34:00	1 day, 0:30:00	01:11:00	00:36:00	01:19:00	02:33:00	URM1	EDJ2	Buccal	4 days, 16:59:00
70 days, 7:01:00	114 days, 1:06:00	2 days, 7:04:00	06:03:00	5 days, 17:13:00	11 days, 21:37:00	BDL	2 days, 11:21:00	BDL	01:44:00	1 day, 0:13:00	01:14:00	00:37:00	01:17:00	02:39:00	URM1	EDJ2	Buccal	4 days, 17:34:00
70 days, 14:28:00	109 days, 14:27:00	2 days, 12:27:00	05:37:00	5 days, 15:33:00	12 days, 2:28:00	BDL	2 days, 9:35:00	BDL	01:20:00	1 day, 0:31:00	01:11:00	00:36:00	01:18:00	02:35:00	URM1	EDJ2	Buccal	4 days, 18:10:00
70 days, 22:34:00	119 days, 1:47:00	2 days, 0:10:00	07:25:00	5 days, 7:21:00	11 days, 10:43:00	BDL	2 days, 7:37:00	BDL	02:21:00	23:20:00	01:17:00	00:34:00	01:14:00	02:30:00	URM1	EDJ2	Buccal	4 days, 19:25:00
71 days, 6:01:00	111 days, 0:21:00	2 days, 2:02:00	07:30:00	5 days, 13:49:00	12 days, 0:38:00	BDL	2 days, 7:52:00	BDL	03:00:00	23:32:00	01:12:00	00:36:00	01:18:00	02:30:00	URM1	EDJ2	Buccal	4 days, 20:02:00
71 days, 13:28:00	110 days, 1:23:00	2 days, 3:25:00	06:57:00	5 days, 13:03:00	11 days, 21:25:00	BDL	2 days, 6:19:00	BDL	03:18:00	23:39:00	01:11:00	00:36:00	01:17:00	02:26:00	URM1	EDJ2	Buccal	4 days, 20:39:00
71 days, 21:34:00	111 days, 11:11:00	2 days, 4:30:00	06:24:00	6 days, 5:12:00	11 days, 16:37:00	BDL	2 days, 7:53:00	BDL	02:41:00	1 day, 0:31:00	01:12:00	00:40:00	01:16:00	02:30:00	URM1	EDJ2	Buccal	4 days, 21:17:00
72 days, 5:01:00	107 days, 2:29:00	2 days, 5:27:00	06:33:00	5 days, 16:09:00	11 days, 12:32:00	BDL	2 days, 7:02:00	BDL	02:03:00	1 day, 0:33:00	01:09:00	00:37:00	01:15:00	02:28:00	URM1	EDJ2	Buccal	4 days, 22:35:00
72 days, 12:28:00	108 days, 11:44:00	2 days, 8:07:00	06:08:00	5 days, 14:15:00	12 days, 4:53:00	BDL	2 days, 10:36:00	BDL	01:39:00	1 day, 0:09:00	01:10:00	00:36:00	01:19:00	02:38:00	URM1	EDJ2	Buccal	4 days, 23:14:00
72 days, 20:34:00	113 days, 17:05:00	2 days, 3:29:00	05:44:00	5 days, 4:42:00	11 days, 16:27:00	BDL	2 days, 8:33:00	BDL	01:23:00	1 day, 0:11:00	01:14:00	00:34:00	01:16:00	02:31:00	URM1	EDJ2	Buccal	4 days, 23:54:00
73 days, 4:01:00	104 days, 3:36:00	2 days, 3:12:00	06:28:00	5 days, 2:23:00	11 days, 8:02:00	BDL	2 days, 6:12:00	BDL	01:30:00	23:12:00	01:08:00	00:33:00	01:13:00	02:26:00	URM1	EDJ2	Buccal	5 days, 0:34:00
73 days, 11:27:00	112 days, 18:17:00	2 days, 6:31:00	06:37:00	5 days, 17:15:00	11 days, 18:13:00	00:07:00	2 days, 9:47:00	BDL	01:31:00	1 day, 0:00:00	01:13:00	00:37:00	01:16:00	02:35:00	URM1	EDJ2	Buccal	5 days, 1:15:00
73 days, 19:34:00	110 days, 20:00:00	2 days, 7:18:00	06:52:00	5 days, 8:08:00	11 days, 12:41:00	BDL	2 days, 10:53:00	BDL	01:18:00	1 day, 0:54:00	01:12:00	00:35:00	01:15:00	02:38:00	URM1	EDJ2	Buccal	5 days, 2:37:00
74 days, 3:01:00	113 days, 2:57:00	2 days, 7:20:00	05:46:00	5 days, 17:23:00	11 days, 23:09:00	BDL	2 days, 11:00:00	BDL	01:38:00	1 day, 1:31:00	01:13:00	00:37:00	01:18:00	02:39:00	URM1	EDJ2	Buccal	5 days, 3:19:00
74 days, 10:27:00	118 days, 9:13:00	2 days, 8:03:00	06:14:00	5 days, 11:38:00	11 days, 12:56:00	BDL	2 days, 11:39:00	BDL	01:05:00	1 day, 1:31:00	01:17:00	00:36:00	01:15:00	02:41:00	URM1	EDJ2	Buccal	5 days, 4:03:00
74 days, 18:35:00	111 days, 15:05:00	2 days, 10:03:00	06:20:00	5 days, 14:01:00	11 days, 11:14:00	BDL	2 days, 11:16:00	BDL	01:28:00	1 day, 0:11:00	01:12:00	00:36:00	01:14:00	02:39:00	URM1	EDJ2	Buccal	5 days, 4:46:00
75 days, 2:01:00	108 days, 19:14:00	2 days, 6:20:00	06:12:00	5 days, 16:58:00	11 days, 6:24:00	BDL	2 days, 8:18:00	BDL	01:19:00	1 day, 0:16:00	01:11:00	00:37:00	01:13:00	02:32:00	URM1	EDJ2	Buccal	5 days, 5:32:00
75 days, 9:28:00	109 days, 13:08:00	2 days, 6:19:00	05:45:00	5 days, 10:57:00	11 days, 6:07:00	00:07:00	2 days, 9:11:00	BDL	01:21:00	1 day, 1:37:00	01:11:00	00:35:00	01:13:00	02:33:00	URM1	EDJ2	Buccal	5 days, 6:22:00
75 days, 17:34:00	114 days, 17:04:00	2 days, 8:29:00	06:19:00	5 days, 13:55:00	11 days, 6:30:00	BDL	2 days, 12:07:00	BDL	01:09:00	1 day, 0:02:00	01:14:00	00:36:00	01:13:00	02:41:00	URM1	EDJ2	Buccal	5 days, 7:14:00
76 days, 1:01:00	106 days, 18:25:00	2 days, 5:37:00	06:16:00	5 days, 8:39:00	11 days, 19:45:00	BDL	2 days, 9:57:00	BDL	01:35:00	1 day, 0:05:00	01:09:00	00:35:00	01:17:00	02:36:00	URM1	EDJ2	Buccal	5 days, 8:10:00
76 days, 8:27:00	105 days, 0:29:00	2 days, 3:25:00	06:13:00	5 days, 3:05:00	10 days, 22:50:00	BDL	2 days, 8:03:00	BDL	01:25:00	23:26:00	01:08:00	00:33:00	01:11:00	02:31:00	URM1	EDJ2	Buccal	5 days, 9:08:00
76 days, 16:34:00	106 days, 15:28:00	2 days, 2:22:00	06:14:00	5 days, 3:39:00	10 days, 18:33:00	BDL	2 days, 7:39:00	BDL	01:43:00	23:37:00	01:09:00	00:33:00	01:10:00	02:29:00	URM1	EDJ2	Buccal	5 days, 10:09:00
77 days, 0:01:00	180 days, 19:00:00	2 days, 7:41:00	05:43:00	5 days, 12:14:00	11 days, 0:31:00	BDL	2 days, 7:53:00	BDL	01:16:00	23:49:00	01:57:00	00:36:00	01:11:00	02:30:00	URM1	EDJ2	Buccal	5 days, 11:12:00
77 days, 7:28:00	109 days, 0:30:00	2 days, 7:37:00	05:18:00	5 days, 21:26:00	10 days, 16:38:00	BDL	2 days, 9:30:00	BDL	01:07:00	23:33:00	01:11:00	00:38:00	01:09:00	02:35:00	URM1	EDJ2	Buccal	5 days, 12:17:00
77 days, 15:34:00	104 days, 20:18:00	2 days, 9:19:00	06:27:00	5 days, 19:32:00	10 days, 20:13:00	BDL	2 days, 8:20:00	BDL	01:28:00	23:04:00	01:08:00	00:38:00	01:10:00	02:31:00	URM1	EDJ2	Buccal	5 days, 13:24:00
77 days, 23:01:00	110 days, 19:32:00	2 days, 5:39:00	05:50:00	5 days, 13:46:00	10 days, 17:42:00	BDL	2 days, 9:18:00	BDL	01:15:00	22:26:00	01:12:00	00:36:00	01:10:00	02:35:00	URM1	EDJ2	Buccal	5 days, 14:32:00
78 days, 6:27:00	108 days, 5:11:00	2 days, 6:34:00	05:50:00	5 days, 2:28:00	10 days, 23:02:00	BDL	2 days, 5:11:00	BDL	01:26:00	23:09:00	01:10:00	00:33:00	01:11:00	02:22:00	URM1	EDJ2	Buccal	5 days, 15:42:00
78 days, 14:34:00	108 days, 7:59:00	2 days, 3:36:00	05:51:00	5 days, 11:50:00	10 days, 12:14:00	BDL	2 days, 7:03:00	BDL	01:33:00	23:02:00	01:10:00	00:36:00	01:08:00	02:28:00	URM1	EDJ2	Buccal	5 days, 16:52:00
78 days, 22:00:00	102 days, 3:13:00	2 days, 6:15:00	06:28:00	5 days, 5:33:00	10 days, 9:51:00	BDL	2 days, 10:54:00	BDL	01:35:00	23:32:00	01:06:00	00:34:00	01:07:00	02:38:00	URM1	EDJ2	Buccal	5 days, 18:03:00
79 days, 5:27:00	104 days, 13:26:00	2 days, 2:05:00	06:16:00	5 days, 5:21:00	10 days, 19:09:00	BDL	2 days, 5:35:00	BDL	01:15:00	23:19:00	01:08:00	00:34:00	01:10:00	02:23:00	URM1	EDJ2	Buccal	5 days, 19:15:00
79 days, 13:34:00	101 days, 10:10:00	1 day, 23:20:00	06:08:00	5 days, 1:19:00	10 days, 9:41:00	BDL	2 days, 6:12:00	BDL	01:47:00	22:27:00	01:06:00	00:33:00	01:07:00	02:25:00	URM1	EDJ2	Buccal	5 days, 20:27:00
79 days, 21:00:00	103 days, 20:45:00	2 days, 4:02:00	05:55:00	5 days, 5:38:00	10 days, 9:05:00	BDL	2 days, 3:57:00	BDL	01:13:00	22:29:00	01:07:00	00:34:00	01:07:00	02:19:00	URM1	EDJ2	Buccal	5 days, 21:39:00
80 days, 4:27:00	107 days, 20:21:00	2 days, 2:13:00	06:19:00	5 days, 8:05:00	10 days, 22:18:00	BDL	2 days, 5:11:00	BDL	01:24:00	23:06:00	01:10:00	00:34:00	01:11:00	02:22:00	URM1	EDJ2	Buccal	5 days, 22:10:00
80 days, 12:34:00	112 days, 6:05:00	2 days, 0:29:00	06:09:00	9 days, 19:00:00	10 days, 14:24:00	BDL	2 days, 8:02:00	BDL	01:27:00	23:32:00	01:13:00	01:04:00	01:09:00	02:30:00	URM1	EDJ2	Buccal	5 days, 23:21:00
80 days, 20:01:00	129 days, 20:38:00	2 days, 1:31:00	05:37:00	5 days, 4:38:00	10 days, 10:26:00	BDL	2 days, 3:49:00	BDL	01:25:00	21:50:00	01:24:00	00:34:00	01:08:00	02:19:00	URM1	EDJ2	Buccal	6 days, 0:31:00
81 days, 3:27:00	111 days, 23:14:00	1 day, 23:26:00	05:56:00	4 days, 19:31:00	10 days, 19:05:00	BDL	2 days, 6:38:00	BDL	01:19:00	23:03:00	01:13:00	00:31:00	01:10:00	02:27:00	URM1	EDJ2	Buccal	6 days, 1:40:00
81 days, 11:34:00	107 days, 3:15:00	2 days, 1:54:00	06:03:00	4 days, 15:06:00	10 days, 12:00:00	BDL	2 days, 4:13:00	BDL	01:01:00	22:34:00	01:09:00	00:30:00	01:08:00	02:21:00	URM1	EDJ2	Buccal	6 days, 2:48:00
81 days, 19:00:00	116 days, 21:49:00	2 days, 2:59:00	05:48:00	4 days, 20:24:00	10 days, 13:11:00	BDL	2 days, 3:55:00	BDL	01:05:00	22:18:00	01:16:00	00:31:00	01:08:00	02:19:00	URM1	EDJ2	Buccal	6 days, 3:54:00
82 days, 2:27:00	106 days, 11:33:00	1 day, 23:03:00	05:46:00	5 days, 8:03:00	11 days, 4:12:00	BDL	2 days, 5:08:00	BDL	01:19:00	23:06:00	01:09:00	00:34:00	01:12:00	02:23:00	URM1	EDJ2	Buccal	6 days, 4:59:00
82 days, 10:33:00	107 days, 1:36:00	1 day, 23:31:00	06:12:00	5 days, 3:58:00	10 days, 14:21:00	BDL	2 days, 5:09:00	BDL	01:08:00	22:54:00	01:09:00	00:33:00	01:09:00	02:23:00	URM1	EDJ2	Buccal	6 days, 6:07:00
82 days, 18:01:00	105 days, 22:28:00	1 day, 23:20:00	05:40:00	5 days, 5:28:00	10 days, 22:21:00	BDL	2 days, 9:28:00	BDL	01:04:00	22:52:00	01:09:00	00:34:00	01:11:00	02:35:00	URM1	EDJ2	Buccal	6 days, 7:17:00
83 days, 1:27:00	110 days, 10:11:00	1 day, 22:31:00	06:09:00	5 days, 7:08:00	10 days, 19:36:00	BDL	2 days, 6:44:00	BDL	01:20:00	22:33:00	01:12:00	00:34:00	01:10:00	02:27:00	URM1	EDJ2	Buccal	6 days, 8:29:00
83 days, 9:34:00	105 days, 10:34:00	1 day, 23:11:00	06:08:00	5 days, 2:39:00	11 days, 2:00:00	BDL	2 days, 4:50:00	BDL	01:01:00	23:37:00	01:08:00	00:33:00	01:12:00	02:22:00	URM1	EDJ2	Buccal	6 days, 9:04:00
83 days, 17:00:00	103 days, 5:37:00	2 days, 1:11:00	04:22:00	5 days, 11:23:00	11 days, 0:29:00	BDL	2 days, 6:33:00	BDL	01:14:00	22:46:00	01:07:00	00:35:00	01:11:00	02:26:00	URM1	EDJ2	Buccal	6 days, 10:21:00
84 days, 0:27:00	106 days, 11:24:00	2 days, 3:08:00	06:09:00	5 days, 6:06:00	10 days, 16:30:00	BDL	2 days, 6:08:00	BDL	01:28:00	23:36:00	01:09:00	00:34:00	01:09:00	02:25:00	URM1	EDJ2	Buccal	6 days, 11:39:00
84 days, 8:33:00	107 days, 1:51:00	2 days, 2:50:00	05:28:00	5 days, 15:00:00	11 days, 2:27:00	BDL	2 days, 8:50:00	BDL	01:15:00	1 day, 1:08:00	01:09:00	00:36:00	01:12:00	02:33:00	URM1	EDJ2	Buccal	6 days, 13:00:00
84 days, 16:00:00	109 days, 6:49:00	2 days, 0:33:00	05:57:00	5 days, 14:33:00	10 days, 17:50:00	BDL	2 days, 16:39:00	BDL	01:16:00	22:30:00	01:11:00	00:36:00	01:10:00	02:54:00	URM1	EDJ2	Buccal	6 days, 14:21:00
84 days, 23:27:00	104 days, 19:38:00	1 day, 23:17:00	07:43:00	5 days, 15:29:00	11 days, 2:22:00	BDL	2 days, 6:49:00	00:05:00	01:40:00	23:28:00	01:08:00	00:36:00	01:12:00	02:27:00	URM1	EDJ2	Buccal	6 days, 15:05:00
85 days, 7:33:00	105 days, 21:48:00	1 day, 22:51:00	07:17:00	5 days, 7:36:00	10 days, 17:35:00	00:07:00	2 days, 6:29:00	BDL	01:32:00	23:23:00	01:09:00	00:34:00	01:10:00	02:26:00	URM1	EDJ2	Buccal	6 days, 16:29:00
85 days, 15:00:00	104 days, 20:22:00	1 day, 21:41:00	06:11:00	5 days, 1:01:00	10 days, 20:12:00	BDL	2 days, 5:53:00	BDL	01:11:00	23:36:00	01:08:00	00:33:00	01:10:00	02:25:00	URM1	EDJ2	Buccal	6 days, 17:55:00
85 days, 22:27:00	103 days, 18:36:00	1 day, 22:28:00	07:15:00	5 days, 1:59:00	10 days, 19:42:00	BDL	2 days, 4:26:00	BDL	01:20:00	22:35:00	01:07:00	00:33:00	01:10:00	02:21:00	URM1	EDJ2	Buccal	6 days, 19:22:00
86 days, 6:33:00	110 days, 14:04:00	1 day, 18:31:00	07:33:00	4 days, 23:02:00	10 days, 22:15:00	BDL	2 days, 4:33:00	BDL	01:22:00	23:00:00	01:12:00	00:32:00	01:11:00	02:20:00	URM1	EDJ2	Buccal	6 days, 20:10:00
86 days, 14:00:00	107 days, 17:26:00	1 day, 20:27:00	06:38:00	5 days, 11:36:00	10 days, 22:00:00	BDL	2 days, 4:00:00	BDL	01:29:00	23:26:00	01:10:00	00:36:00	01:11:00	02:21:00	URM1	EDJ2	Buccal	6 days, 21:38:00
86 days, 21:26:00	106 days, 4:56:00	1 day, 23:43:00	05:27:00	5 days, 4:47:00	10 days, 21:33:00	00:07:00	2 days, 3:16:00	BDL	01:10:00	22:09:00	01:09:00	00:34:00	01:11:00	02:18:00	URM1	EDJ2	Buccal	6 days, 23:07:00
87 days, 5:33:00	104 days, 8:17:00	1 day, 21:13:00	06:26:00	4 days, 23:01:00	10 days, 19:15:00	BDL	2 days, 3:44:00	BDL	01:23:00	22:09:00	01:08:00	00:32:00	01:10:00	02:19:00	URM1	EDJ2	Buccal	7 days, 0:37:00
87 days, 13:00:00	102 days, 10:05:00	1 day, 21:15:00	06:32:00	5 days, 3:20:00	10 days, 21:53:00	BDL	2 days, 4:20:00	BDL	01:36:00	22:10:00	01:06:00	00:33:00	01:11:00	02:20:00	URM1	EDJ2	Buccal	7 days, 1:27:00
87 days, 20:26:00	105 days, 7:05:00	1 day, 23:46:00	06:17:00	5 days, 4:25:00	10 days, 20:21:00	BDL	2 days, 1:35:00	BDL	01:18:00	23:10:00	01:08:00	00:34:00	01:10:00	02:12:00	URM1	EDJ2	Buccal	7 days, 2:57:00
88 days, 4:34:00	105 days, 20:08:00	1 day, 18:44:00	06:05:00	5 days, 9:15:00	10 days, 15:23:00	BDL	2 days, 3:14:00	BDL	01:17:00	22:10:00	01:09:00	00:35:00	01:09:00	02:17:00	URM1	EDJ2	Buccal	7 days, 4:27:00
88 days, 12:00:00	106 days, 18:56:00	1 day, 19:14:00	06:39:00	5 days, 12:24:00	10 days, 14:16:00	BDL	2 days, 4:07:00	BDL	01:15:00	22:19:00	01:09:00	00:36:00	01:09:00	02:21:00	URM1	EDJ2	Buccal	7 days, 5:17:00
88 days, 19:27:00	106 days, 5:14:00	2 days, 0:38:00	05:32:00	5 days, 12:49:00	10 days, 20:29:00	BDL	2 days, 3:21:00	BDL	01:56:00	22:20:00	01:09:00	00:36:00	01:10:00	02:17:00	URM1	EDJ2	Buccal	7 days, 6:46:00
89 days, 3:33:00	110 days, 10:52:00	1 day, 22:29:00	06:19:00	5 days, 15:14:00	10 days, 15:07:00	BDL	2 days, 4:25:00	BDL	01:29:00	22:03:00	01:12:00	00:36:00	01:09:00	02:21:00	URM1	EDJ2	Buccal	7 days, 8:15:00
89 days, 11:00:00	106 days, 0:28:00	1 day, 22:09:00	05:21:00	5 days, 10:28:00	10 days, 8:11:00	BDL	2 days, 2:06:00	BDL	01:07:00	22:11:00	01:09:00	00:35:00	01:07:00	02:15:00	URM1	EDJ2	Buccal	7 days, 9:04:00
89 days, 18:26:00	106 days, 9:10:00	1 day, 23:03:00	06:28:00	6 days, 5:16:00	11 days, 0:37:00	BDL	2 days, 2:59:00	BDL	01:38:00	22:38:00	01:09:00	00:40:00	01:11:00	02:17:00	URM1	EDJ2	Buccal	7 days, 10:32:00
90 days, 2:33:00	109 days, 9:36:00	2 days, 2:34:00	05:31:00	5 days, 4:33:00	10 days, 13:59:00	BDL	2 days, 5:22:00	BDL	01:35:00	21:58:00	01:11:00	00:34:00	01:09:00	02:23:00	URM1	EDJ2	Buccal	7 days, 11:59:00
90 days, 10:00:00	106 days, 0:02:00	1 day, 21:04:00	05:26:00	5 days, 9:18:00	10 days, 6:55:00	BDL	2 days, 4:35:00	BDL	01:28:00	22:00:00	01:09:00	00:35:00	01:07:00	02:21:00	URM1	EDJ2	Buccal	7 days, 13:26:00
90 days, 17:27:00	112 days, 16:18:00	1 day, 21:13:00	05:49:00	5 days, 6:37:00	10 days, 7:00:00	BDL	2 days, 7:10:00	BDL	01:17:00	22:06:00	01:13:00	00:34:00	01:07:00	02:28:00	URM1	EDJ2	Buccal	7 days, 14:14:00
91 days, 1:33:00	107 days, 12:22:00	1 day, 19:13:00	06:26:00	5 days, 7:05:00	10 days, 2:05:00	BDL	2 days, 1:41:00	BDL	01:29:00	21:41:00	01:10:00	00:34:00	01:05:00	02:14:00	URM1	EDJ2	Buccal	7 days, 15:43:00
91 days, 9:00:00	112 days, 5:28:00	2 days, 0:08:00	05:23:00	5 days, 3:46:00	10 days, 9:23:00	BDL	2 days, 4:38:00	BDL	01:51:00	21:19:00	01:13:00	00:33:00	01:07:00	02:22:00	URM1	EDJ2	Buccal	7 days, 17:14:00
91 days, 16:26:00	109 days, 1:29:00	1 day, 19:42:00	05:30:00	5 days, 7:05:00	10 days, 4:28:00	BDL	2 days, 2:36:00	BDL	01:44:00	21:20:00	01:11:00	00:34:00	01:06:00	02:16:00	URM1	EDJ2	Buccal	7 days, 18:05:00
92 days, 0:33:00	106 days, 23:16:00	1 day, 18:22:00	06:12:00	5 days, 1:25:00	10 days, 2:15:00	BDL	2 days, 2:19:00	BDL	02:11:00	21:29:00	01:09:00	00:33:00	01:05:00	02:15:00	URM1	EDJ2	Buccal	7 days, 19:36:00
92 days, 7:59:00	107 days, 3:56:00	2 days, 0:06:00	05:27:00	5 days, 11:10:00	10 days, 7:07:00	BDL	2 days, 4:11:00	BDL	02:07:00	22:08:00	01:10:00	00:35:00	01:07:00	02:20:00	URM1	EDJ2	Buccal	7 days, 21:08:00
92 days, 15:26:00	106 days, 6:39:00	1 day, 17:57:00	06:28:00	5 days, 3:06:00	10 days, 2:20:00	BDL	2 days, 0:34:00	BDL	02:07:00	21:41:00	01:09:00	00:33:00	01:05:00	02:11:00	URM1	EDJ2	Buccal	7 days, 22:01:00
92 days, 23:33:00	108 days, 6:15:00	1 day, 20:47:00	06:45:00	5 days, 1:59:00	10 days, 8:22:00	BDL	2 days, 3:12:00	BDL	02:37:00	22:05:00	01:10:00	00:33:00	01:07:00	02:18:00	URM1	EDJ2	Buccal	7 days, 23:33:00
93 days, 6:59:00	114 days, 7:00:00	1 day, 22:46:00	06:04:00	5 days, 2:22:00	10 days, 2:23:00	BDL	2 days, 2:32:00	BDL	02:17:00	23:05:00	01:14:00	00:33:00	01:05:00	02:16:00	URM1	EDJ2	Buccal	8 days, 1:05:00
93 days, 14:26:00	110 days, 23:10:00	1 day, 20:09:00	06:03:00	5 days, 10:37:00	10 days, 19:16:00	BDL	2 days, 6:11:00	BDL	01:56:00	22:56:00	01:12:00	00:35:00	01:10:00	02:25:00	URM1	EDJ2	Buccal	8 days, 2:37:00
93 days, 22:33:00	105 days, 19:45:00	1 day, 18:19:00	05:42:00	5 days, 2:16:00	12 days, 16:21:00	BDL	2 days, 2:19:00	BDL	01:28:00	22:17:00	01:09:00	00:33:00	01:22:00	02:15:00	URM1	EDJ2	Buccal	8 days, 3:28:00
94 days, 6:00:00	110 days, 17:40:00	1 day, 21:41:00	05:28:00	5 days, 11:12:00	10 days, 12:04:00	BDL	2 days, 3:09:00	BDL	01:49:00	22:46:00	01:12:00	00:35:00	01:08:00	02:18:00	URM1	EDJ2	Buccal	8 days, 4:59:00
94 days, 13:26:00	105 days, 8:32:00	1 day, 22:33:00	05:44:00	5 days, 9:34:00	10 days, 14:05:00	BDL	2 days, 4:50:00	BDL	01:59:00	22:42:00	01:08:00	00:35:00	01:09:00	02:22:00	URM1	EDJ2	Buccal	8 days, 6:29:00
94 days, 21:33:00	125 days, 12:48:00	1 day, 23:23:00	05:16:00	5 days, 5:15:00	10 days, 13:54:00	BDL	2 days, 4:37:00	BDL	01:32:00	22:17:00	01:21:00	00:34:00	01:09:00	02:20:00	URM1	EDJ2	Buccal	8 days, 7:18:00
95 days, 4:59:00	103 days, 5:32:00	1 day, 20:57:00	07:20:00	4 days, 19:11:00	10 days, 5:10:00	BDL	2 days, 0:32:00	BDL	01:09:00	22:39:00	01:07:00	00:31:00	01:06:00	02:11:00	URM1	EDJ2	Buccal	8 days, 8:48:00
95 days, 12:26:00	105 days, 20:25:00	1 day, 20:12:00	06:43:00	5 days, 10:28:00	10 days, 11:12:00	BDL	2 days, 6:20:00	BDL	01:37:00	22:11:00	01:09:00	00:35:00	01:08:00	02:25:00	URM1	EDJ2	Buccal	8 days, 10:18:00
95 days, 20:32:00	109 days, 1:50:00	1 day, 20:00:00	06:30:00	5 days, 9:20:00	10 days, 17:39:00	BDL	2 days, 6:04:00	BDL	01:14:00	21:05:00	01:11:00	00:35:00	01:09:00	02:25:00	URM1	EDJ2	Buccal	8 days, 11:07:00
96 days, 4:00:00	112 days, 20:44:00	2 days, 3:36:00	05:26:00	5 days, 10:29:00	10 days, 20:53:00	BDL	2 days, 6:28:00	BDL	01:16:00	22:27:00	01:13:00	00:35:00	01:10:00	02:27:00	URM1	EDJ2	Buccal	8 days, 12:37:00
96 days, 11:26:00	112 days, 1:44:00	2 days, 0:31:00	05:29:00	5 days, 1:06:00	11 days, 2:06:00	BDL	2 days, 6:12:00	BDL	02:01:00	23:23:00	01:13:00	00:33:00	01:12:00	02:26:00	URM1	EDJ2	Buccal	8 days, 14:07:00
96 days, 19:33:00	106 days, 23:32:00	1 day, 17:25:00	05:38:00	5 days, 8:10:00	10 days, 19:15:00	BDL	2 days, 3:20:00	BDL	01:40:00	22:38:00	01:09:00	00:35:00	01:10:00	02:18:00	URM1	EDJ2	Buccal	8 days, 15:38:00
97 days, 2:59:00	105 days, 0:30:00	1 day, 16:47:00	06:00:00	4 days, 23:46:00	10 days, 2:19:00	BDL	2 days, 4:44:00	BDL	01:42:00	21:41:00	01:08:00	00:32:00	01:05:00	02:22:00	URM1	EDJ2	Buccal	8 days, 16:28:00
97 days, 10:26:00	105 days, 2:04:00	1 day, 17:20:00	06:30:00	5 days, 7:48:00	10 days, 16:32:00	00:08:00	2 days, 6:08:00	00:05:00	02:05:00	22:17:00	01:08:00	00:34:00	01:09:00	02:25:00	URM1	EDJ2	Buccal	8 days, 17:58:00
97 days, 18:32:00	110 days, 3:22:00	2 days, 0:39:00	06:46:00	5 days, 4:24:00	10 days, 17:07:00	BDL	2 days, 7:43:00	BDL	02:04:00	22:54:00	01:11:00	00:33:00	01:09:00	02:30:00	URM1	EDJ2	Buccal	8 days, 19:29:00
98 days, 1:59:00	99 days, 4:39:00	1 day, 19:17:00	05:55:00	4 days, 17:49:00	9 days, 14:38:00	BDL	2 days, 0:45:00	BDL	01:01:00	20:39:00	01:04:00	00:31:00	01:02:00	02:11:00	URM1	EDJ2	Buccal	8 days, 20:20:00
98 days, 9:26:00	108 days, 0:33:00	1 day, 19:09:00	05:49:00	5 days, 8:09:00	9 days, 21:28:00	BDL	2 days, 2:14:00	00:04:00	01:00:00	21:23:00	01:10:00	00:35:00	01:04:00	02:16:00	URM1	EDJ2	Buccal	8 days, 21:50:00
98 days, 17:32:00	104 days, 4:30:00	1 day, 21:21:00	06:26:00	5 days, 9:06:00	10 days, 7:34:00	BDL	2 days, 4:10:00	00:05:00	01:20:00	22:08:00	01:08:00	00:35:00	01:07:00	02:21:00	URM1	EDJ2	Buccal	8 days, 23:21:00
99 days, 0:59:00	107 days, 0:53:00	1 day, 20:32:00	06:32:00	5 days, 14:10:00	9 days, 21:12:00	BDL	2 days, 8:47:00	BDL	01:24:00	21:02:00	01:09:00	00:36:00	01:04:00	02:33:00	URM1	EDJ2	Buccal	9 days, 0:12:00
99 days, 8:26:00	107 days, 20:44:00	1 day, 21:34:00	07:03:00	6 days, 3:13:00	10 days, 0:31:00	BDL	2 days, 4:13:00	BDL	01:34:00	21:04:00	01:10:00	00:40:00	01:05:00	02:20:00	URM1	EDJ2	Buccal	9 days, 1:43:00
99 days, 16:32:00	104 days, 17:20:00	1 day, 21:36:00	07:50:00	5 days, 16:32:00	10 days, 22:07:00	BDL	2 days, 8:07:00	BDL	02:17:00	1 day, 0:05:00	01:08:00	00:37:00	01:11:00	02:30:00	URM1	EDJ2	Buccal	9 days, 3:15:00
99 days, 23:59:00	105 days, 17:31:00	1 day, 16:22:00	05:20:00	6 days, 5:20:00	10 days, 8:35:00	00:07:00	2 days, 7:02:00	BDL	01:36:00	22:35:00	01:09:00	00:40:00	01:07:00	02:28:00	URM1	EDJ2	Buccal	9 days, 4:06:00
100 days, 7:25:00	91 days, 14:20:00	1 day, 18:18:00	06:09:00	5 days, 15:50:00	9 days, 11:34:00	BDL	2 days, 4:21:00	BDL	01:37:00	21:15:00	00:59:00	00:37:00	01:01:00	02:21:00	URM1	EDJ2	Buccal	9 days, 5:38:00
100 days, 15:32:00	104 days, 21:19:00	1 day, 23:02:00	07:27:00	6 days, 5:00:00	10 days, 11:12:00	BDL	2 days, 5:44:00	BDL	01:33:00	23:27:00	01:08:00	00:40:00	01:08:00	02:24:00	URM1	EDJ2	Buccal	9 days, 7:09:00
100 days, 22:59:00	111 days, 1:03:00	1 day, 20:42:00	06:13:00	6 days, 8:16:00	10 days, 14:29:00	BDL	2 days, 8:34:00	BDL	01:07:00	1 day, 0:06:00	01:12:00	00:41:00	01:09:00	02:32:00	URM1	EDJ2	Buccal	9 days, 8:01:00
101 days, 6:25:00	117 days, 8:36:00	2 days, 0:56:00	06:20:00	6 days, 1:43:00	10 days, 17:28:00	00:07:00	2 days, 8:08:00	BDL	01:53:00	23:59:00	01:16:00	00:39:00	01:09:00	02:30:00	URM1	EDJ2	Buccal	9 days, 9:33:00
101 days, 14:33:00	106 days, 23:56:00	1 day, 22:31:00	07:34:00	5 days, 10:08:00	9 days, 23:12:00	BDL	2 days, 3:07:00	BDL	01:16:00	23:49:00	01:09:00	00:35:00	01:05:00	02:18:00	URM1	EDJ2	Buccal	9 days, 11:05:00
101 days, 21:59:00	105 days, 8:25:00	1 day, 19:08:00	09:03:00	5 days, 17:33:00	10 days, 4:08:00	BDL	2 days, 4:16:00	BDL	01:00:00	22:05:00	01:08:00	00:37:00	01:06:00	02:21:00	URM1	EDJ2	Buccal	9 days, 12:37:00
102 days, 5:26:00	109 days, 17:40:00	1 day, 21:16:00	06:15:00	5 days, 11:59:00	10 days, 3:04:00	BDL	2 days, 7:03:00	BDL	01:30:00	22:20:00	01:11:00	00:36:00	01:06:00	02:28:00	URM1	EDJ2	Buccal	9 days, 13:29:00
102 days, 13:32:00	103 days, 11:22:00	2 days, 0:13:00	07:34:00	5 days, 12:23:00	10 days, 5:07:00	BDL	2 days, 3:29:00	BDL	01:37:00	22:50:00	01:07:00	00:36:00	01:06:00	02:19:00	URM1	EDJ2	Buccal	9 days, 15:01:00
102 days, 20:59:00	105 days, 20:06:00	2 days, 0:30:00	06:25:00	5 days, 8:35:00	10 days, 9:44:00	BDL	2 days, 4:42:00	BDL	01:48:00	22:25:00	01:09:00	00:35:00	01:07:00	02:22:00	URM1	EDJ2	Buccal	9 days, 16:32:00
103 days, 4:25:00	105 days, 12:09:00	1 day, 17:35:00	06:08:00	5 days, 16:16:00	10 days, 7:07:00	00:08:00	2 days, 5:31:00	BDL	01:32:00	22:54:00	01:08:00	00:37:00	01:07:00	02:24:00	URM1	EDJ2	Buccal	9 days, 17:21:00
103 days, 12:32:00	108 days, 18:22:00	1 day, 21:15:00	06:09:00	5 days, 18:30:00	10 days, 6:36:00	BDL	2 days, 9:30:00	00:06:00	01:41:00	22:54:00	01:11:00	00:37:00	01:07:00	02:34:00	URM1	EDJ2	Buccal	9 days, 18:49:00
103 days, 19:59:00	109 days, 22:05:00	2 days, 1:00:00	06:06:00	5 days, 13:37:00	10 days, 10:10:00	BDL	2 days, 4:34:00	BDL	01:45:00	22:28:00	01:11:00	00:36:00	01:08:00	02:20:00	URM1	EDJ2	Buccal	9 days, 20:15:00
104 days, 3:26:00	102 days, 2:03:00	1 day, 20:04:00	07:25:00	6 days, 0:39:00	10 days, 7:31:00	BDL	2 days, 5:17:00	BDL	01:56:00	23:33:00	01:06:00	00:39:00	01:07:00	02:24:00	URM1	EDJ2	Buccal	9 days, 21:01:00
104 days, 11:32:00	105 days, 2:05:00	1 day, 22:04:00	06:53:00	5 days, 19:02:00	10 days, 8:20:00	BDL	2 days, 6:14:00	BDL	02:17:00	1 day, 1:47:00	01:08:00	00:38:00	01:07:00	02:26:00	URM1	EDJ2	Buccal	9 days, 22:25:00
104 days, 18:59:00	112 days, 17:04:00	1 day, 23:50:00	06:51:00	5 days, 13:37:00	11 days, 6:10:00	BDL	2 days, 5:52:00	BDL	02:05:00	23:28:00	01:13:00	00:36:00	01:13:00	02:25:00	URM1	EDJ2	Buccal	9 days, 23:48:00
105 days, 2:25:00	105 days, 14:16:00	2 days, 0:16:00	06:43:00	5 days, 19:23:00	10 days, 16:02:00	BDL	2 days, 6:36:00	BDL	02:25:00	22:10:00	01:08:00	00:38:00	01:09:00	02:27:00	URM1	EDJ2	Buccal	10 days, 1:11:00
105 days, 10:32:00	111 days, 4:29:00	2 days, 0:11:00	06:18:00	5 days, 14:15:00	10 days, 17:09:00	00:06:00	2 days, 6:17:00	BDL	02:13:00	22:17:00	01:12:00	00:36:00	01:09:00	02:26:00	URM1	EDJ2	Buccal	10 days, 2:33:00
105 days, 17:58:00	109 days, 20:18:00	2 days, 1:32:00	07:05:00	5 days, 8:58:00	10 days, 11:18:00	BDL	2 days, 7:20:00	BDL	01:01:00	21:22:00	01:11:00	00:35:00	01:08:00	02:28:00	URM1	EDJ2	Buccal	10 days, 3:15:00
106 days, 1:25:00	109 days, 5:06:00	1 day, 22:02:00	06:37:00	5 days, 11:20:00	10 days, 20:37:00	BDL	2 days, 4:50:00	BDL	01:15:00	21:33:00	01:11:00	00:35:00	01:10:00	02:22:00	URM1	EDJ2	Buccal	10 days, 4:36:00
106 days, 9:32:00	96 days, 3:07:00	1 day, 21:18:00	08:05:00	4 days, 21:49:00	9 days, 8:01:00	BDL	2 days, 2:35:00	BDL	01:34:00	18:06:00	01:02:00	00:32:00	01:00:00	02:15:00	URM1	EDJ2	Buccal	10 days, 5:57:00
106 days, 16:58:00	107 days, 2:10:00	2 days, 5:01:00	06:07:00	5 days, 12:29:00	11 days, 8:35:00	BDL	2 days, 9:41:00	BDL	01:47:00	22:42:00	01:09:00	00:36:00	01:14:00	02:35:00	URM1	EDJ2	Buccal	10 days, 7:18:00
107 days, 0:25:00	175 days, 5:24:00	2 days, 3:25:00	06:24:00	6 days, 23:22:00	11 days, 7:23:00	00:06:00	2 days, 8:06:00	BDL	02:11:00	23:40:00	01:54:00	00:45:00	01:13:00	02:30:00	URM1	EDJ2	Buccal	10 days, 8:39:00
107 days, 8:32:00	107 days, 21:40:00	1 day, 23:38:00	06:54:00	5 days, 22:22:00	11 days, 19:17:00	BDL	2 days, 7:54:00	BDL	01:51:00	22:47:00	01:10:00	00:38:00	01:16:00	02:30:00	URM1	EDJ2	Buccal	10 days, 9:20:00
107 days, 15:59:00	108 days, 4:24:00	1 day, 20:45:00	06:56:00	5 days, 7:31:00	10 days, 22:57:00	BDL	2 days, 9:17:00	BDL	02:21:00	1 day, 0:17:00	01:10:00	00:34:00	01:11:00	02:33:00	URM1	EDJ2	Buccal	10 days, 10:42:00
107 days, 23:25:00	99 days, 7:33:00	1 day, 18:57:00	06:06:00	5 days, 12:06:00	10 days, 3:20:00	BDL	2 days, 4:10:00	BDL	02:07:00	20:18:00	01:04:00	00:36:00	01:06:00	02:20:00	URM1	EDJ2	Buccal	10 days, 12:04:00
108 days, 7:32:00	109 days, 6:58:00	1 day, 22:59:00	07:27:00	5 days, 18:00:00	11 days, 1:19:00	BDL	2 days, 6:06:00	BDL	02:33:00	23:02:00	01:11:00	00:37:00	01:12:00	02:25:00	URM1	EDJ2	Buccal	10 days, 13:27:00
108 days, 14:58:00	105 days, 3:53:00	1 day, 20:11:00	06:12:00	5 days, 12:35:00	11 days, 5:19:00	BDL	2 days, 5:51:00	00:04:00	01:34:00	22:27:00	01:08:00	00:36:00	01:13:00	02:25:00	URM1	EDJ2	Buccal	10 days, 14:10:00
108 days, 22:25:00	111 days, 1:17:00	1 day, 22:35:00	06:51:00	5 days, 16:30:00	11 days, 2:33:00	BDL	2 days, 7:21:00	BDL	02:05:00	22:11:00	01:12:00	00:37:00	01:12:00	02:28:00	URM1	EDJ2	Buccal	10 days, 15:34:00
109 days, 6:31:00	108 days, 1:10:00	1 day, 20:35:00	07:32:00	5 days, 2:05:00	11 days, 8:20:00	BDL	2 days, 5:55:00	BDL	02:13:00	22:35:00	01:10:00	00:33:00	01:13:00	02:25:00	URM1	EDJ2	Buccal	10 days, 16:59:00
109 days, 13:59:00	111 days, 10:56:00	1 day, 19:22:00	07:20:00	6 days, 15:43:00	11 days, 9:46:00	BDL	2 days, 8:55:00	BDL	01:47:00	23:30:00	01:12:00	00:43:00	01:14:00	02:33:00	URM1	EDJ2	Buccal	10 days, 18:26:00
109 days, 21:25:00	113 days, 4:10:00	1 day, 20:05:00	06:52:00	5 days, 11:00:00	11 days, 12:12:00	00:07:00	2 days, 7:21:00	BDL	01:32:00	23:22:00	01:13:00	00:35:00	01:15:00	02:29:00	URM1	EDJ2	Buccal	10 days, 19:13:00
110 days, 5:32:00	109 days, 3:00:00	1 day, 21:40:00	06:55:00	5 days, 4:32:00	11 days, 1:00:00	BDL	2 days, 7:38:00	BDL	01:12:00	23:34:00	01:11:00	00:34:00	01:12:00	02:29:00	URM1	EDJ2	Buccal	10 days, 20:42:00
110 days, 12:58:00	109 days, 11:27:00	1 day, 22:24:00	06:53:00	5 days, 8:51:00	11 days, 9:16:00	BDL	2 days, 13:17:00	BDL	01:22:00	22:48:00	01:11:00	00:35:00	01:14:00	02:45:00	URM1	EDJ2	Buccal	10 days, 22:13:00
110 days, 20:25:00	108 days, 13:00:00	1 day, 23:17:00	06:51:00	5 days, 8:20:00	11 days, 10:51:00	BDL	2 days, 9:11:00	BDL	01:14:00	23:41:00	01:10:00	00:35:00	01:14:00	02:34:00	URM1	EDJ2	Buccal	10 days, 23:05:00
111 days, 4:31:00	110 days, 20:04:00	2 days, 0:53:00	06:24:00	5 days, 8:34:00	11 days, 9:06:00	BDL	2 days, 6:49:00	BDL	01:11:00	23:03:00	01:12:00	00:35:00	01:14:00	02:27:00	URM1	EDJ2	Buccal	11 days, 0:39:00
111 days, 11:58:00	109 days, 7:20:00	1 day, 20:24:00	06:37:00	5 days, 3:55:00	11 days, 9:05:00	BDL	2 days, 8:04:00	BDL	01:11:00	22:09:00	01:11:00	00:33:00	01:14:00	02:30:00	URM1	EDJ2	Buccal	11 days, 2:15:00
111 days, 19:25:00	112 days, 19:58:00	1 day, 22:05:00	06:36:00	5 days, 13:26:00	11 days, 13:38:00	BDL	2 days, 7:26:00	BDL	01:29:00	22:48:00	01:13:00	00:36:00	01:15:00	02:29:00	URM1	EDJ2	Buccal	11 days, 3:13:00
112 days, 3:31:00	108 days, 23:19:00	1 day, 20:23:00	07:25:00	4 days, 20:22:00	10 days, 17:23:00	BDL	2 days, 6:17:00	00:05:00	01:54:00	22:04:00	01:11:00	00:31:00	01:09:00	02:26:00	URM1	EDJ2	Buccal	11 days, 4:53:00
112 days, 10:58:00	107 days, 16:37:00	1 day, 19:29:00	07:17:00	5 days, 7:04:00	11 days, 5:26:00	BDL	2 days, 6:30:00	BDL	01:31:00	22:22:00	01:10:00	00:34:00	01:13:00	02:27:00	URM1	EDJ2	Buccal	11 days, 6:35:00
112 days, 18:25:00	109 days, 18:04:00	1 day, 20:22:00	07:03:00	5 days, 9:51:00	11 days, 2:18:00	BDL	2 days, 7:04:00	BDL	01:43:00	22:35:00	01:11:00	00:35:00	01:12:00	02:29:00	URM1	EDJ2	Buccal	11 days, 7:40:00
113 days, 2:31:00	109 days, 1:46:00	2 days, 0:11:00	06:42:00	5 days, 9:56:00	10 days, 23:49:00	BDL	2 days, 5:32:00	BDL	01:15:00	23:17:00	01:11:00	00:35:00	01:11:00	02:23:00	URM1	EDJ2	Buccal	11 days, 9:28:00
113 days, 9:58:00	103 days, 22:31:00	1 day, 22:19:00	06:37:00	5 days, 3:21:00	11 days, 0:24:00	BDL	2 days, 6:08:00	BDL	01:47:00	21:55:00	01:07:00	00:33:00	01:11:00	02:26:00	URM1	EDJ2	Buccal	11 days, 10:38:00
113 days, 17:24:00	109 days, 3:01:00	1 day, 18:00:00	06:40:00	5 days, 8:07:00	10 days, 19:33:00	BDL	2 days, 5:25:00	BDL	01:11:00	22:40:00	01:11:00	00:35:00	01:10:00	02:23:00	URM1	EDJ2	Buccal	11 days, 12:31:00
114 days, 1:31:00	113 days, 0:20:00	1 day, 23:01:00	06:34:00	5 days, 7:10:00	11 days, 1:43:00	BDL	2 days, 7:14:00	BDL	01:23:00	23:00:00	01:13:00	00:34:00	01:12:00	02:29:00	URM1	EDJ2	Buccal	11 days, 13:47:00
114 days, 8:58:00	105 days, 1:37:00	1 day, 19:08:00	06:39:00	5 days, 5:08:00	10 days, 20:25:00	00:08:00	2 days, 6:06:00	BDL	01:04:00	22:07:00	01:08:00	00:34:00	01:10:00	02:26:00	URM1	EDJ2	Buccal	11 days, 15:06:00
114 days, 16:24:00	112 days, 17:32:00	1 day, 19:31:00	06:57:00	5 days, 6:13:00	11 days, 0:39:00	BDL	2 days, 8:12:00	BDL	01:37:00	22:33:00	01:13:00	00:34:00	01:11:00	02:32:00	URM1	EDJ2	Buccal	11 days, 17:06:00
115 days, 0:32:00	105 days, 9:58:00	1 day, 21:39:00	06:39:00	5 days, 0:28:00	10 days, 16:56:00	BDL	2 days, 7:33:00	BDL	01:29:00	23:02:00	01:08:00	00:32:00	01:09:00	02:28:00	URM1	EDJ2	Buccal	11 days, 18:28:00
115 days, 7:58:00	110 days, 20:19:00	1 day, 20:43:00	07:39:00	5 days, 10:18:00	11 days, 9:28:00	00:08:00	2 days, 9:38:00	BDL	01:28:00	22:58:00	01:12:00	00:35:00	01:14:00	02:35:00	URM1	EDJ2	Buccal	11 days, 20:31:00
115 days, 15:25:00	109 days, 0:30:00	1 day, 19:10:00	06:48:00	5 days, 10:52:00	11 days, 4:32:00	BDL	2 days, 10:02:00	BDL	01:13:00	1 day, 1:24:00	01:11:00	00:35:00	01:12:00	02:36:00	URM1	EDJ2	Buccal	11 days, 21:55:00
115 days, 23:31:00	108 days, 10:08:00	1 day, 16:03:00	06:34:00	5 days, 4:21:00	10 days, 14:03:00	BDL	2 days, 9:08:00	BDL	01:19:00	22:17:00	01:10:00	00:34:00	01:09:00	02:33:00	URM1	EDJ2	Buccal	11 days, 23:21:00
116 days, 6:58:00	105 days, 14:20:00	1 day, 17:48:00	07:11:00	5 days, 0:36:00	10 days, 23:29:00	BDL	2 days, 10:56:00	BDL	01:29:00	23:01:00	01:08:00	00:33:00	01:11:00	02:38:00	URM1	EDJ2	Buccal	12 days, 1:29:00
116 days, 14:24:00	107 days, 10:55:00	1 day, 21:56:00	07:06:00	5 days, 4:19:00	10 days, 19:27:00	BDL	2 days, 10:50:00	BDL	01:29:00	1 day, 0:00:00	01:10:00	00:33:00	01:10:00	02:38:00	URM1	EDJ2	Buccal	12 days, 2:57:00
116 days, 22:31:00	106 days, 23:23:00	2 days, 1:05:00	06:11:00	5 days, 16:03:00	10 days, 18:28:00	BDL	2 days, 10:00:00	BDL	01:13:00	22:50:00	01:09:00	00:37:00	01:10:00	02:37:00	URM1	EDJ2	Buccal	12 days, 4:27:00
117 days, 5:58:00	115 days, 1:37:00	1 day, 23:20:00	07:56:00	5 days, 21:35:00	11 days, 10:20:00	BDL	2 days, 11:23:00	BDL	01:16:00	1 day, 0:12:00	01:15:00	00:38:00	01:14:00	02:40:00	URM1	EDJ2	Buccal	12 days, 6:37:00
117 days, 13:25:00	106 days, 22:16:00	1 day, 18:13:00	07:33:00	5 days, 9:56:00	10 days, 16:03:00	00:07:00	2 days, 9:55:00	BDL	01:37:00	22:19:00	01:09:00	00:35:00	01:09:00	02:36:00	URM1	EDJ2	Buccal	12 days, 8:09:00
117 days, 21:31:00	114 days, 2:40:00	1 day, 22:26:00	07:44:00	5 days, 9:23:00	11 days, 0:13:00	BDL	2 days, 12:39:00	BDL	01:14:00	23:23:00	01:14:00	00:35:00	01:11:00	02:42:00	URM1	EDJ2	Buccal	12 days, 9:42:00
118 days, 4:58:00	109 days, 2:03:00	1 day, 22:38:00	07:21:00	5 days, 20:08:00	11 days, 8:50:00	00:13:00	2 days, 10:18:00	BDL	02:02:00	23:01:00	01:11:00	00:38:00	01:14:00	02:37:00	URM1	EDJ2	Buccal	12 days, 11:16:00
118 days, 12:24:00	104 days, 21:50:00	1 day, 17:16:00	07:24:00	4 days, 20:10:00	10 days, 14:07:00	BDL	2 days, 6:34:00	BDL	01:25:00	21:56:00	01:08:00	00:31:00	01:09:00	02:26:00	URM1	EDJ2	Buccal	12 days, 13:31:00
118 days, 20:31:00	111 days, 23:47:00	1 day, 21:22:00	07:24:00	5 days, 4:20:00	10 days, 20:23:00	BDL	2 days, 11:09:00	00:06:00	01:38:00	22:16:00	01:13:00	00:34:00	01:10:00	02:39:00	URM1	EDJ2	Buccal	12 days, 15:06:00
119 days, 3:57:00	109 days, 7:33:00	1 day, 19:30:00	06:59:00	5 days, 6:37:00	11 days, 2:32:00	BDL	2 days, 8:00:00	00:06:00	01:48:00	22:25:00	01:11:00	00:34:00	01:12:00	02:30:00	URM1	EDJ2	Buccal	12 days, 16:42:00
119 days, 11:24:00	109 days, 11:20:00	1 day, 21:51:00	06:25:00	5 days, 6:07:00	11 days, 18:29:00	00:07:00	2 days, 10:21:00	BDL	01:46:00	22:58:00	01:11:00	00:34:00	01:16:00	02:36:00	URM1	EDJ2	Buccal	12 days, 18:20:00
119 days, 19:31:00	108 days, 22:19:00	1 day, 19:01:00	06:46:00	5 days, 0:05:00	11 days, 7:13:00	BDL	2 days, 9:31:00	00:05:00	01:44:00	22:27:00	01:11:00	00:32:00	01:13:00	02:35:00	URM1	EDJ2	Buccal	12 days, 20:37:00
120 days, 2:57:00	106 days, 22:04:00	1 day, 22:09:00	07:06:00	4 days, 18:53:00	11 days, 5:36:00	BDL	2 days, 8:23:00	BDL	02:00:00	21:54:00	01:09:00	00:31:00	01:13:00	02:32:00	URM1	EDJ2	Buccal	12 days, 22:15:00
120 days, 10:24:00	106 days, 5:34:00	1 day, 23:18:00	07:18:00	5 days, 11:49:00	11 days, 14:00:00	BDL	2 days, 9:03:00	BDL	01:56:00	21:36:00	01:09:00	00:36:00	01:15:00	02:34:00	URM1	EDJ2	Buccal	12 days, 23:54:00
120 days, 18:31:00	96 days, 18:17:00	1 day, 19:31:00	05:45:00	4 days, 20:25:00	10 days, 16:07:00	BDL	2 days, 4:42:00	BDL	01:41:00	20:30:00	01:03:00	00:31:00	01:09:00	02:22:00	URM1	EDJ2	Buccal	13 days, 1:34:00
121 days, 1:58:00	110 days, 3:07:00	1 day, 20:27:00	06:42:00	5 days, 8:36:00	11 days, 9:28:00	BDL	2 days, 5:29:00	BDL	01:37:00	21:42:00	01:11:00	00:35:00	01:14:00	02:24:00	URM1	EDJ2	Buccal	13 days, 3:13:00
121 days, 9:24:00	111 days, 12:06:00	1 day, 19:26:00	07:21:00	5 days, 18:36:00	11 days, 17:21:00	BDL	2 days, 6:12:00	00:08:00	02:37:00	21:13:00	01:12:00	00:37:00	01:16:00	02:25:00	URM1	EDJ2	Buccal	13 days, 5:34:00
121 days, 17:31:00	107 days, 19:28:00	1 day, 23:37:00	07:03:00	5 days, 17:26:00	11 days, 18:03:00	00:10:00	2 days, 7:07:00	BDL	03:26:00	22:14:00	01:10:00	00:37:00	01:16:00	02:29:00	URM1	EDJ2	Buccal	13 days, 7:14:00
122 days, 0:57:00	107 days, 1:20:00	2 days, 2:23:00	08:26:00	6 days, 1:08:00	11 days, 20:17:00	BDL	2 days, 8:07:00	BDL	02:44:00	21:28:00	01:09:00	00:39:00	01:17:00	02:32:00	URM1	EDJ2	Buccal	13 days, 8:55:00
122 days, 8:24:00	106 days, 22:14:00	2 days, 1:30:00	07:01:00	5 days, 18:10:00	11 days, 16:12:00	BDL	2 days, 9:33:00	BDL	02:39:00	22:35:00	01:09:00	00:37:00	01:16:00	02:35:00	URM1	EDJ2	Buccal	13 days, 10:37:00
122 days, 16:30:00	105 days, 11:12:00	2 days, 0:06:00	06:12:00	5 days, 19:48:00	11 days, 11:22:00	BDL	2 days, 10:13:00	00:09:00	02:07:00	22:01:00	01:08:00	00:38:00	01:14:00	02:36:00	URM1	EDJ2	Buccal	13 days, 12:21:00
122 days, 23:58:00	108 days, 20:02:00	2 days, 0:06:00	07:29:00	5 days, 14:36:00	11 days, 10:52:00	BDL	2 days, 8:58:00	00:05:00	02:31:00	23:12:00	01:11:00	00:36:00	01:14:00	02:33:00	URM1	EDJ2	Buccal	13 days, 14:07:00
123 days, 7:24:00	114 days, 4:57:00	2 days, 0:14:00	07:01:00	5 days, 12:26:00	11 days, 7:31:00	00:14:00	2 days, 9:25:00	00:08:00	03:04:00	22:23:00	01:14:00	00:36:00	01:13:00	02:35:00	URM1	EDJ2	Buccal	13 days, 16:35:00
123 days, 15:31:00	105 days, 7:54:00	1 day, 22:42:00	06:20:00	5 days, 11:34:00	11 days, 6:02:00	BDL	2 days, 8:15:00	00:06:00	01:56:00	21:14:00	01:08:00	00:35:00	01:13:00	02:32:00	URM1	EDJ2	Buccal	13 days, 18:25:00
123 days, 22:57:00	111 days, 3:10:00	2 days, 0:13:00	07:39:00	5 days, 16:54:00	11 days, 23:29:00	00:09:00	2 days, 11:32:00	00:07:00	02:09:00	21:27:00	01:12:00	00:37:00	01:18:00	02:39:00	URM1	EDJ2	Buccal	13 days, 20:17:00
124 days, 6:24:00	121 days, 1:43:00	1 day, 21:41:00	07:19:00	5 days, 15:09:00	11 days, 21:26:00	BDL	2 days, 5:07:00	00:11:00	02:30:00	21:33:00	01:19:00	00:37:00	01:17:00	02:22:00	URM1	EDJ2	Buccal	13 days, 22:10:00
124 days, 14:30:00	105 days, 0:03:00	1 day, 19:25:00	06:09:00	5 days, 8:50:00	11 days, 17:35:00	00:08:00	2 days, 6:10:00	00:05:00	02:11:00	21:05:00	01:08:00	00:35:00	01:16:00	02:25:00	URM1	EDJ2	Buccal	14 days, 0:04:00
124 days, 21:57:00	102 days, 4:13:00	1 day, 20:38:00	07:06:00	5 days, 9:14:00	11 days, 2:37:00	BDL	2 days, 4:40:00	BDL	02:27:00	22:06:00	01:06:00	00:35:00	01:12:00	02:22:00	URM1	EDJ2	Buccal	14 days, 1:59:00
125 days, 5:24:00	104 days, 15:12:00	1 day, 20:12:00	06:13:00	5 days, 10:37:00	11 days, 7:12:00	BDL	2 days, 7:17:00	00:07:00	02:09:00	23:14:00	01:08:00	00:35:00	01:13:00	02:29:00	URM1	EDJ2	Buccal	14 days, 3:55:00
125 days, 13:30:00	104 days, 10:36:00	1 day, 21:13:00	07:05:00	5 days, 9:11:00	11 days, 17:31:00	BDL	2 days, 6:03:00	00:06:00	02:21:00	21:25:00	01:08:00	00:35:00	01:16:00	02:25:00	URM1	EDJ2	Buccal	14 days, 5:51:00
125 days, 20:57:00	108 days, 5:32:00	1 day, 18:53:00	06:49:00	5 days, 8:45:00	11 days, 17:22:00	BDL	2 days, 8:38:00	00:06:00	02:32:00	21:34:00	01:10:00	00:35:00	01:16:00	02:31:00	URM1	EDJ2	Buccal	14 days, 7:48:00
126 days, 4:24:00	106 days, 5:05:00	1 day, 21:34:00	07:12:00	5 days, 13:33:00	11 days, 23:21:00	BDL	2 days, 6:14:00	BDL	02:20:00	22:17:00	01:09:00	00:36:00	01:18:00	02:26:00	URM1	EDJ2	Buccal	14 days, 9:45:00
126 days, 12:30:00	102 days, 12:24:00	2 days, 1:20:00	06:09:00	5 days, 10:31:00	11 days, 20:08:00	BDL	2 days, 5:48:00	00:06:00	01:50:00	22:03:00	01:06:00	00:35:00	01:17:00	02:25:00	URM1	EDJ2	Buccal	14 days, 11:42:00
126 days, 19:57:00	107 days, 10:22:00	2 days, 4:53:00	07:18:00	5 days, 5:11:00	12 days, 3:53:00	00:09:00	2 days, 10:35:00	00:10:00	02:06:00	22:03:00	01:10:00	00:34:00	01:19:00	02:38:00	URM1	EDJ2	Buccal	14 days, 13:38:00
127 days, 3:23:00	109 days, 3:24:00	1 day, 21:58:00	07:07:00	4 days, 23:22:00	12 days, 6:17:00	BDL	2 days, 8:05:00	00:06:00	01:42:00	21:09:00	01:11:00	00:32:00	01:20:00	02:30:00	URM1	EDJ2	Buccal	14 days, 15:34:00
127 days, 11:30:00	110 days, 21:20:00	1 day, 21:11:00	07:03:00	5 days, 7:39:00	12 days, 7:35:00	BDL	2 days, 7:30:00	00:14:00	01:46:00	23:04:00	01:12:00	00:34:00	01:20:00	02:29:00	URM1	EDJ2	Buccal	14 days, 17:29:00
127 days, 18:57:00	106 days, 1:51:00	1 day, 23:14:00	08:21:00	5 days, 11:36:00	12 days, 11:12:00	00:11:00	2 days, 8:23:00	00:07:00	02:35:00	22:29:00	01:09:00	00:35:00	01:21:00	02:32:00	URM1	EDJ2	Buccal	14 days, 19:24:00
128 days, 2:23:00	105 days, 22:36:00	1 day, 21:51:00	07:08:00	4 days, 15:40:00	12 days, 4:21:00	00:12:00	2 days, 6:44:00	00:06:00	02:13:00	21:49:00	01:09:00	00:30:00	01:19:00	02:27:00	URM1	EDJ2	Buccal	14 days, 21:17:00
128 days, 10:31:00	102 days, 8:06:00	2 days, 3:13:00	06:55:00	5 days, 6:58:00	12 days, 6:38:00	00:09:00	2 days, 8:35:00	00:06:00	02:10:00	21:19:00	01:06:00	00:34:00	01:20:00	02:32:00	URM1	EDJ2	Buccal	14 days, 23:09:00
128 days, 17:57:00	104 days, 12:55:00	1 day, 20:38:00	06:59:00	5 days, 10:00:00	12 days, 1:33:00	00:08:00	2 days, 6:17:00	BDL	02:02:00	21:13:00	01:08:00	00:35:00	01:18:00	02:26:00	URM1	EDJ2	Buccal	15 days, 1:03:00
129 days, 1:24:00	110 days, 20:15:00	2 days, 0:04:00	07:57:00	5 days, 6:49:00	12 days, 11:50:00	00:09:00	2 days, 11:07:00	00:04:00	01:47:00	21:33:00	01:12:00	00:34:00	01:21:00	02:39:00	URM1	EDJ2	Buccal	15 days, 3:37:00
129 days, 9:30:00	104 days, 11:25:00	1 day, 22:06:00	07:31:00	5 days, 16:35:00	12 days, 12:36:00	00:16:00	2 days, 10:00:00	00:09:00	02:22:00	22:07:00	01:08:00	00:37:00	01:21:00	02:36:00	URM1	EDJ2	Buccal	15 days, 5:32:00
129 days, 16:57:00	108 days, 19:49:00	2 days, 2:14:00	08:43:00	6 days, 0:04:00	12 days, 12:19:00	00:12:00	2 days, 9:17:00	00:06:00	02:24:00	23:23:00	01:11:00	00:39:00	01:21:00	02:33:00	URM1	EDJ2	Buccal	15 days, 7:28:00
130 days, 0:23:00	112 days, 6:23:00	2 days, 1:23:00	07:09:00	5 days, 14:52:00	12 days, 21:02:00	00:16:00	2 days, 13:27:00	00:10:00	02:05:00	23:15:00	01:13:00	00:36:00	01:24:00	02:46:00	URM1	EDJ2	Buccal	15 days, 9:24:00
130 days, 8:30:00	111 days, 9:28:00	2 days, 0:27:00	07:28:00	5 days, 14:43:00	12 days, 21:42:00	00:07:00	2 days, 11:19:00	00:07:00	02:25:00	22:03:00	01:12:00	00:36:00	01:24:00	02:39:00	URM1	EDJ2	Buccal	15 days, 11:22:00
130 days, 15:57:00	108 days, 22:40:00	2 days, 2:36:00	07:38:00	6 days, 19:29:00	12 days, 18:32:00	00:11:00	2 days, 9:31:00	00:10:00	03:12:00	22:21:00	01:11:00	00:44:00	01:23:00	02:35:00	URM1	EDJ2	Buccal	15 days, 13:20:00
130 days, 23:24:00	114 days, 8:42:00	2 days, 3:37:00	07:14:00	5 days, 23:12:00	13 days, 6:32:00	00:12:00	2 days, 16:17:00	00:11:00	02:16:00	22:33:00	01:14:00	00:39:00	01:26:00	02:53:00	URM1	EDJ2	Buccal	15 days, 15:19:00
131 days, 7:30:00	110 days, 21:33:00	2 days, 2:11:00	07:23:00	5 days, 9:28:00	13 days, 6:20:00	00:19:00	2 days, 7:43:00	00:16:00	02:16:00	22:21:00	01:12:00	00:35:00	01:26:00	02:30:00	URM1	EDJ2	Buccal	15 days, 17:18:00
131 days, 14:57:00	108 days, 20:27:00	1 day, 21:37:00	06:40:00	5 days, 6:38:00	12 days, 21:21:00	00:06:00	2 days, 8:03:00	BDL	02:10:00	22:10:00	01:11:00	00:34:00	01:23:00	02:31:00	URM1	EDJ2	Buccal	15 days, 19:18:00
131 days, 22:23:00	101 days, 17:33:00	1 day, 20:34:00	06:47:00	5 days, 9:01:00	12 days, 4:52:00	00:09:00	2 days, 3:08:00	00:08:00	02:14:00	20:08:00	01:06:00	00:35:00	01:19:00	02:17:00	URM1	EDJ2	Buccal	15 days, 21:19:00
132 days, 6:30:00	113 days, 12:11:00	2 days, 3:07:00	08:25:00	5 days, 14:09:00	13 days, 18:16:00	00:16:00	2 days, 6:00:00	00:08:00	02:27:00	21:17:00	01:14:00	00:36:00	01:29:00	02:25:00	URM1	EDJ2	Buccal	15 days, 23:20:00
132 days, 13:56:00	108 days, 8:38:00	2 days, 7:36:00	08:24:00	5 days, 2:40:00	12 days, 18:21:00	00:14:00	2 days, 5:27:00	00:16:00	02:40:00	20:16:00	01:10:00	00:33:00	01:23:00	02:24:00	URM1	EDJ2	Buccal	16 days, 1:22:00
132 days, 21:23:00	105 days, 14:49:00	2 days, 0:37:00	07:19:00	5 days, 4:31:00	12 days, 22:10:00	BDL	2 days, 6:40:00	00:14:00	02:15:00	21:13:00	01:08:00	00:34:00	01:24:00	02:27:00	URM1	EDJ2	Buccal	16 days, 3:24:00
133 days, 5:30:00	106 days, 17:03:00	1 day, 22:08:00	08:05:00	5 days, 4:58:00	13 days, 3:10:00	00:09:00	2 days, 5:51:00	BDL	05:32:00	21:05:00	01:09:00	00:34:00	01:25:00	02:25:00	URM1	EDJ2	Buccal	16 days, 5:27:00
133 days, 12:56:00	106 days, 8:25:00	1 day, 21:46:00	07:08:00	5 days, 10:06:00	12 days, 19:32:00	00:19:00	2 days, 7:50:00	00:12:00	02:31:00	20:19:00	01:09:00	00:35:00	01:23:00	02:30:00	URM1	EDJ2	Buccal	16 days, 7:30:00
133 days, 20:23:00	105 days, 4:59:00	2 days, 1:46:00	07:49:00	5 days, 13:31:00	12 days, 20:32:00	00:22:00	2 days, 8:04:00	00:09:00	02:42:00	21:04:00	01:08:00	00:36:00	01:23:00	02:30:00	URM1	EDJ2	Buccal	16 days, 9:34:00
134 days, 4:30:00	102 days, 20:27:00	2 days, 6:00:00	07:42:00	5 days, 16:18:00	13 days, 13:13:00	00:16:00	2 days, 8:01:00	00:19:00	03:07:00	23:05:00	01:07:00	00:37:00	01:28:00	02:31:00	URM1	EDJ2	Buccal	16 days, 11:38:00
134 days, 11:57:00	105 days, 2:10:00	2 days, 6:55:00	08:14:00	5 days, 11:04:00	13 days, 5:18:00	00:10:00	2 days, 10:11:00	00:13:00	02:25:00	21:05:00	01:08:00	00:35:00	01:26:00	02:36:00	URM1	EDJ2	Buccal	16 days, 13:02:00
134 days, 19:23:00	101 days, 21:49:00	2 days, 0:00:00	07:11:00	5 days, 13:16:00	13 days, 18:34:00	00:23:00	2 days, 9:02:00	00:13:00	02:38:00	21:44:00	01:06:00	00:36:00	01:29:00	02:34:00	URM1	EDJ2	Buccal	16 days, 15:07:00
135 days, 3:30:00	103 days, 0:33:00	2 days, 1:17:00	08:28:00	5 days, 10:20:00	13 days, 22:10:00	00:25:00	2 days, 8:08:00	00:18:00	02:13:00	22:02:00	01:07:00	00:35:00	01:30:00	02:30:00	URM1	EDJ2	Buccal	16 days, 17:12:00
135 days, 10:56:00	100 days, 9:02:00	2 days, 0:03:00	08:39:00	5 days, 15:26:00	14 days, 1:11:00	00:15:00	2 days, 19:06:00	00:19:00	02:14:00	21:16:00	01:05:00	00:37:00	01:31:00	03:01:00	URM1	EDJ2	Buccal	16 days, 19:17:00
135 days, 18:23:00	106 days, 6:03:00	2 days, 0:10:00	08:04:00	5 days, 20:03:00	15 days, 1:39:00	00:17:00	2 days, 9:12:00	00:23:00	02:38:00	21:18:00	01:09:00	00:38:00	01:38:00	02:34:00	URM1	EDJ2	Buccal	16 days, 21:23:00
136 days, 2:29:00	108 days, 10:55:00	2 days, 0:18:00	08:07:00	6 days, 4:01:00	15 days, 0:15:00	00:22:00	2 days, 7:29:00	00:23:00	02:23:00	22:06:00	01:10:00	00:40:00	01:37:00	02:29:00	URM1	EDJ2	Buccal	16 days, 23:28:00
136 days, 9:57:00	104 days, 15:56:00	2 days, 0:27:00	07:30:00	5 days, 17:30:00	14 days, 18:39:00	00:14:00	2 days, 9:34:00	00:16:00	02:30:00	20:54:00	01:08:00	00:37:00	01:36:00	02:35:00	URM1	EDJ2	Buccal	17 days, 1:34:00
136 days, 17:23:00	111 days, 6:37:00	2 days, 4:28:00	07:42:00	6 days, 0:26:00	15 days, 16:41:00	00:17:00	2 days, 9:09:00	00:23:00	02:02:00	21:45:00	01:12:00	00:39:00	01:42:00	02:34:00	URM1	EDJ2	Buccal	17 days, 3:40:00
137 days, 1:30:00	107 days, 16:23:00	2 days, 3:20:00	08:16:00	5 days, 20:38:00	16 days, 0:40:00	00:18:00	2 days, 12:34:00	00:15:00	02:05:00	23:26:00	01:10:00	00:38:00	01:44:00	02:42:00	URM1	EDJ2	Buccal	17 days, 5:46:00
137 days, 8:56:00	103 days, 16:20:00	2 days, 3:12:00	07:02:00	5 days, 10:33:00	15 days, 8:24:00	00:27:00	2 days, 16:03:00	00:13:00	02:18:00	21:45:00	01:07:00	00:35:00	01:40:00	02:52:00	URM1	EDJ2	Buccal	17 days, 7:52:00
137 days, 16:23:00	109 days, 4:29:00	2 days, 2:19:00	07:48:00	5 days, 16:54:00	15 days, 22:02:00	00:26:00	2 days, 11:05:00	00:14:00	02:08:00	21:33:00	01:11:00	00:37:00	01:43:00	02:39:00	URM1	EDJ2	Buccal	17 days, 9:59:00
138 days, 0:29:00	101 days, 12:34:00	2 days, 2:26:00	07:01:00	5 days, 3:59:00	15 days, 3:00:00	00:22:00	2 days, 7:06:00	00:09:00	02:10:00	21:25:00	01:06:00	00:33:00	01:38:00	02:28:00	URM1	EDJ2	Buccal	17 days, 12:06:00
138 days, 7:56:00	102 days, 22:23:00	2 days, 3:33:00	08:03:00	5 days, 10:19:00	15 days, 8:10:00	00:26:00	2 days, 8:50:00	00:23:00	02:18:00	21:03:00	01:07:00	00:35:00	01:39:00	02:33:00	URM1	EDJ2	Buccal	17 days, 14:14:00
138 days, 15:23:00	103 days, 10:33:00	2 days, 2:29:00	07:59:00	5 days, 16:45:00	15 days, 12:00:00	00:17:00	2 days, 8:33:00	00:29:00	02:19:00	21:35:00	01:07:00	00:37:00	01:41:00	02:32:00	URM1	EDJ2	Buccal	17 days, 16:23:00
138 days, 23:29:00	106 days, 7:41:00	2 days, 0:40:00	07:40:00	5 days, 21:32:00	15 days, 14:51:00	00:27:00	2 days, 9:50:00	00:31:00	02:05:00	20:51:00	01:09:00	00:38:00	01:41:00	02:35:00	URM1	EDJ2	Buccal	17 days, 18:32:00
139 days, 6:56:00	109 days, 17:30:00	2 days, 3:27:00	08:11:00	5 days, 6:03:00	14 days, 9:08:00	00:33:00	2 days, 6:24:00	00:24:00	02:23:00	19:16:00	01:11:00	00:34:00	01:33:00	02:27:00	URM1	EDJ2	Buccal	17 days, 20:02:00
139 days, 14:23:00	105 days, 21:00:00	2 days, 3:49:00	08:04:00	5 days, 10:39:00	14 days, 16:47:00	00:34:00	2 days, 7:32:00	00:17:00	02:30:00	21:04:00	01:09:00	00:35:00	01:35:00	02:28:00	URM1	EDJ2	Buccal	17 days, 22:12:00
139 days, 22:29:00	106 days, 7:41:00	2 days, 3:19:00	07:20:00	5 days, 14:16:00	13 days, 12:11:00	00:33:00	2 days, 5:28:00	00:29:00	02:03:00	21:10:00	01:09:00	00:36:00	01:27:00	02:23:00	URM1	EDJ2	Buccal	18 days, 0:22:00
140 days, 5:56:00	107 days, 6:39:00	2 days, 2:26:00	07:52:00	5 days, 13:16:00	12 days, 12:25:00	00:30:00	2 days, 5:18:00	00:21:00	02:17:00	20:01:00	01:10:00	00:36:00	01:21:00	02:24:00	URM1	EDJ2	Buccal	18 days, 2:33:00
140 days, 13:22:00	105 days, 7:09:00	2 days, 4:23:00	08:18:00	5 days, 22:00:00	12 days, 10:38:00	00:28:00	2 days, 9:30:00	00:21:00	02:08:00	20:40:00	01:08:00	00:38:00	01:21:00	02:34:00	URM1	EDJ2	Buccal	18 days, 4:45:00
140 days, 21:29:00	98 days, 10:16:00	1 day, 23:28:00	08:36:00	6 days, 15:03:00	11 days, 17:19:00	00:44:00	2 days, 0:12:00	00:25:00	02:20:00	20:02:00	01:04:00	00:43:00	01:16:00	02:10:00	URM1	EDJ2	Buccal	18 days, 6:56:00
141 days, 4:56:00	102 days, 20:36:00	2 days, 0:31:00	09:01:00	5 days, 17:23:00	11 days, 14:09:00	00:32:00	2 days, 3:56:00	00:34:00	02:15:00	20:31:00	01:07:00	00:37:00	01:15:00	02:19:00	URM1	EDJ2	Buccal	18 days, 9:08:00
141 days, 12:22:00	108 days, 16:48:00	2 days, 0:03:00	09:36:00	5 days, 2:42:00	11 days, 6:46:00	00:38:00	2 days, 2:15:00	00:27:00	02:40:00	20:33:00	01:10:00	00:33:00	01:13:00	02:14:00	URM1	EDJ2	Buccal	18 days, 11:21:00
141 days, 20:30:00	102 days, 3:06:00	2 days, 3:16:00	07:45:00	5 days, 12:31:00	10 days, 17:21:00	00:42:00	2 days, 2:05:00	00:44:00	03:19:00	18:42:00	01:06:00	00:36:00	01:10:00	02:14:00	URM1	EDJ2	Buccal	18 days, 13:34:00
142 days, 3:56:00	108 days, 3:32:00	2 days, 3:29:00	07:56:00	5 days, 14:49:00	10 days, 21:51:00	00:40:00	2 days, 4:58:00	00:30:00	02:58:00	20:24:00	01:10:00	00:36:00	01:11:00	02:22:00	URM1	EDJ2	Buccal	18 days, 15:06:00
142 days, 11:23:00	104 days, 5:01:00	2 days, 1:15:00	10:27:00	5 days, 10:17:00	10 days, 21:37:00	00:58:00	2 days, 2:10:00	00:37:00	03:21:00	20:24:00	01:08:00	00:35:00	01:11:00	02:15:00	URM1	EDJ2	Buccal	18 days, 17:20:00
142 days, 19:29:00	100 days, 5:19:00	1 day, 21:55:00	09:37:00	5 days, 10:07:00	10 days, 23:02:00	00:50:00	2 days, 4:01:00	00:41:00	03:47:00	21:01:00	01:05:00	00:35:00	01:11:00	02:21:00	URM1	EDJ2	Buccal	18 days, 19:33:00
143 days, 2:56:00	102 days, 19:20:00	2 days, 1:36:00	08:17:00	5 days, 17:15:00	10 days, 14:08:00	00:51:00	2 days, 3:27:00	00:41:00	03:01:00	19:08:00	01:07:00	00:37:00	01:09:00	02:17:00	URM1	EDJ2	Buccal	18 days, 21:46:00
143 days, 10:22:00	102 days, 12:39:00	2 days, 3:23:00	08:30:00	5 days, 13:55:00	11 days, 3:01:00	00:35:00	2 days, 4:21:00	00:36:00	02:52:00	19:44:00	01:06:00	00:36:00	01:12:00	02:21:00	URM1	EDJ2	Buccal	19 days, 0:00:00
143 days, 18:29:00	106 days, 22:15:00	2 days, 6:02:00	10:20:00	5 days, 12:46:00	11 days, 8:20:00	00:47:00	2 days, 5:51:00	00:45:00	03:36:00	21:37:00	01:09:00	00:36:00	01:14:00	02:25:00	URM1	EDJ2	Buccal	19 days, 2:14:00
144 days, 1:56:00	102 days, 16:06:00	2 days, 3:09:00	10:34:00	5 days, 13:02:00	11 days, 9:03:00	00:48:00	2 days, 4:00:00	00:39:00	05:07:00	20:08:00	01:07:00	00:36:00	01:14:00	02:21:00	URM1	EDJ2	Buccal	19 days, 4:29:00
144 days, 9:22:00	103 days, 12:56:00	2 days, 2:57:00	09:38:00	6 days, 2:09:00	10 days, 20:21:00	01:01:00	2 days, 5:11:00	00:55:00	04:37:00	21:58:00	01:07:00	00:39:00	01:10:00	02:22:00	URM1	EDJ2	Buccal	19 days, 6:03:00
144 days, 17:29:00	97 days, 16:15:00	2 days, 5:24:00	10:00:00	5 days, 22:11:00	10 days, 11:37:00	00:55:00	2 days, 5:03:00	00:57:00	04:20:00	19:57:00	01:03:00	00:38:00	01:08:00	02:22:00	URM1	EDJ2	Buccal	19 days, 8:18:00
145 days, 0:56:00	99 days, 19:55:00	1 day, 23:44:00	10:23:00	5 days, 10:27:00	10 days, 3:01:00	01:06:00	2 days, 4:01:00	00:40:00	04:50:00	20:25:00	01:05:00	00:35:00	01:06:00	02:19:00	URM1	EDJ2	Buccal	19 days, 10:34:00
145 days, 8:22:00	107 days, 1:34:00	2 days, 2:35:00	12:18:00	6 days, 0:17:00	10 days, 14:03:00	00:59:00	2 days, 7:31:00	00:54:00	05:17:00	22:22:00	01:09:00	00:39:00	01:09:00	02:29:00	URM1	EDJ2	Buccal	19 days, 12:50:00
145 days, 16:29:00	106 days, 2:09:00	2 days, 6:27:00	11:25:00	5 days, 13:17:00	9 days, 21:26:00	01:29:00	2 days, 5:22:00	00:48:00	04:09:00	21:34:00	01:09:00	00:36:00	01:04:00	02:24:00	URM1	EDJ2	Buccal	19 days, 15:06:00
145 days, 23:55:00	101 days, 8:20:00	1 day, 19:35:00	09:36:00	5 days, 18:16:00	9 days, 17:09:00	01:15:00	2 days, 4:19:00	01:08:00	04:59:00	20:29:00	01:06:00	00:37:00	01:03:00	02:20:00	URM1	EDJ2	Buccal	19 days, 17:22:00
146 days, 7:22:00	106 days, 13:48:00	2 days, 1:24:00	11:53:00	6 days, 2:29:00	9 days, 21:10:00	01:09:00	2 days, 4:36:00	01:03:00	05:12:00	21:41:00	01:09:00	00:39:00	01:04:00	02:22:00	URM1	EDJ2	Buccal	19 days, 19:39:00
146 days, 15:29:00	104 days, 0:04:00	2 days, 0:03:00	11:38:00	6 days, 9:42:00	9 days, 8:39:00	01:00:00	2 days, 8:27:00	01:07:00	04:28:00	20:19:00	01:07:00	00:41:00	01:01:00	02:31:00	URM1	EDJ2	Buccal	19 days, 21:16:00
146 days, 22:55:00	100 days, 8:08:00	2 days, 0:32:00	12:23:00	5 days, 17:36:00	9 days, 16:30:00	01:24:00	2 days, 4:08:00	01:15:00	03:48:00	20:38:00	01:05:00	00:37:00	01:03:00	02:21:00	URM1	EDJ2	Buccal	19 days, 23:34:00
147 days, 6:22:00	109 days, 13:52:00	2 days, 2:30:00	13:02:00	6 days, 9:57:00	9 days, 17:24:00	01:22:00	2 days, 6:06:00	01:21:00	04:54:00	21:24:00	01:11:00	00:42:00	01:03:00	02:25:00	URM1	EDJ2	Buccal	20 days, 1:51:00
147 days, 14:29:00	105 days, 4:01:00	2 days, 2:36:00	11:23:00	6 days, 8:15:00	9 days, 16:07:00	01:00:00	2 days, 4:06:00	01:11:00	06:38:00	20:50:00	01:08:00	00:41:00	01:03:00	02:21:00	URM1	EDJ2	Buccal	20 days, 4:10:00
147 days, 21:56:00	99 days, 23:19:00	2 days, 2:17:00	14:20:00	5 days, 19:29:00	9 days, 17:57:00	01:32:00	2 days, 2:49:00	01:22:00	07:07:00	21:05:00	01:05:00	00:38:00	01:03:00	02:16:00	URM1	EDJ2	Buccal	20 days, 6:29:00
148 days, 5:22:00	94 days, 9:11:00	2 days, 2:19:00	13:27:00	5 days, 11:59:00	9 days, 21:05:00	01:27:00	2 days, 4:27:00	01:01:00	06:29:00	19:58:00	01:01:00	00:36:00	01:04:00	02:20:00	URM1	EDJ2	Buccal	20 days, 8:08:00
148 days, 13:29:00	103 days, 8:00:00	2 days, 0:06:00	13:32:00	6 days, 0:19:00	10 days, 6:22:00	01:05:00	2 days, 4:30:00	01:02:00	06:59:00	21:27:00	01:07:00	00:39:00	01:07:00	02:21:00	URM1	EDJ2	Buccal	20 days, 10:27:00
148 days, 20:55:00	98 days, 16:13:00	2 days, 4:53:00	15:15:00	5 days, 20:07:00	9 days, 23:11:00	01:26:00	2 days, 5:10:00	01:10:00	11:11:00	21:07:00	01:04:00	00:38:00	01:05:00	02:24:00	URM1	EDJ2	Buccal
149 days, 4:22:00	99 days, 4:35:00	2 days, 1:07:00	13:35:00	6 days, 2:37:00	10 days, 2:06:00	01:29:00	2 days, 3:47:00	01:33:00	10:11:00	20:39:00	01:04:00	00:39:00	01:05:00	02:19:00	URM1	EDJ2	Buccal
149 days, 12:28:00	99 days, 17:14:00	2 days, 3:20:00	14:20:00	6 days, 0:15:00	10 days, 2:24:00	01:29:00	2 days, 7:20:00	01:00:00	10:45:00	21:10:00	01:05:00	00:39:00	01:05:00	02:28:00	URM1	EDJ2	Buccal
149 days, 19:56:00	97 days, 16:05:00	1 day, 22:59:00	16:04:00	5 days, 23:34:00	10 days, 5:10:00	01:52:00	2 days, 6:13:00	01:36:00	09:29:00	20:54:00	01:03:00	00:39:00	01:06:00	02:25:00	URM1	EDJ2	Buccal
150 days, 3:22:00	98 days, 0:21:00	2 days, 1:30:00	15:39:00	6 days, 7:13:00	12 days, 7:34:00	01:48:00	2 days, 9:20:00	01:29:00	08:50:00	21:36:00	01:04:00	00:41:00	01:20:00	02:34:00	URM1	EDJ2	Buccal
150 days, 11:29:00	96 days, 5:10:00	1 day, 22:03:00	16:54:00	6 days, 9:31:00	10 days, 5:55:00	01:51:00	2 days, 5:02:00	01:23:00	07:10:00	20:20:00	01:02:00	00:41:00	01:06:00	02:23:00	URM1	EDJ2	Buccal
150 days, 18:55:00	101 days, 15:18:00	2 days, 1:20:00	17:24:00	5 days, 18:21:00	10 days, 6:31:00	02:26:00	2 days, 8:20:00	01:49:00	06:03:00	22:05:00	01:06:00	00:37:00	01:07:00	02:31:00	URM1	EDJ2	Buccal
151 days, 2:22:00	99 days, 18:45:00	2 days, 3:12:00	18:15:00	5 days, 23:15:00	11 days, 1:10:00	02:18:00	2 days, 7:43:00	02:12:00	06:26:00	21:15:00	01:05:00	00:39:00	01:12:00	02:30:00	URM1	EDJ2	Buccal
151 days, 10:28:00	96 days, 18:49:00	1 day, 23:25:00	16:36:00	5 days, 19:09:00	10 days, 17:25:00	02:03:00	2 days, 6:27:00	02:03:00	07:44:00	20:35:00	01:03:00	00:37:00	01:10:00	02:26:00	URM1	EDJ2	Buccal
151 days, 17:55:00	97 days, 12:04:00	2 days, 2:03:00	16:50:00	5 days, 22:42:00	11 days, 7:34:00	02:03:00	2 days, 9:19:00	02:11:00	07:06:00	21:55:00	01:03:00	00:38:00	01:13:00	02:33:00	URM1	EDJ2	Buccal
152 days, 1:22:00	98 days, 11:01:00	2 days, 1:49:00	20:07:00	5 days, 22:03:00	12 days, 3:39:00	02:29:00	2 days, 10:52:00	02:19:00	07:21:00	23:13:00	01:04:00	00:38:00	01:19:00	02:38:00	URM1	EDJ2	Buccal
152 days, 9:28:00	108 days, 16:49:00	2 days, 2:14:00	22:11:00	6 days, 6:30:00	12 days, 0:16:00	02:41:00	2 days, 12:06:00	02:45:00	08:17:00	23:31:00	01:10:00	00:41:00	01:18:00	02:42:00	URM1	EDJ2	Buccal
152 days, 16:55:00	101 days, 11:30:00	2 days, 2:55:00	20:34:00	9 days, 3:07:00	12 days, 1:44:00	02:42:00	2 days, 12:53:00	02:31:00	06:13:00	22:02:00	01:06:00	00:59:00	01:18:00	02:44:00	URM1	EDJ2	Buccal
153 days, 0:22:00	97 days, 13:46:00	2 days, 7:41:00	19:47:00	5 days, 16:44:00	12 days, 2:13:00	03:16:00	2 days, 9:18:00	03:13:00	06:07:00	21:19:00	01:03:00	00:37:00	01:18:00	02:35:00	URM1	EDJ2	Buccal
153 days, 8:28:00	98 days, 5:34:00	2 days, 6:08:00	22:11:00	5 days, 15:08:00	11 days, 13:11:00	03:26:00	2 days, 10:49:00	03:33:00	06:19:00	21:24:00	01:04:00	00:36:00	01:15:00	02:38:00	URM1	EDJ2	Buccal
153 days, 15:55:00	106 days, 7:23:00	2 days, 6:14:00	22:26:00	6 days, 8:52:00	11 days, 15:38:00	04:12:00	2 days, 13:14:00	04:25:00	06:24:00	23:11:00	01:09:00	00:41:00	01:16:00	02:44:00	URM1	EDJ2	Buccal
153 days, 23:21:00	116 days, 11:15:00	2 days, 7:51:00	22:25:00	6 days, 7:31:00	10 days, 23:08:00	04:20:00	2 days, 9:35:00	04:23:00	05:34:00	21:23:00	01:16:00	00:41:00	01:11:00	02:34:00	URM1	EDJ2	Buccal
154 days, 7:28:00	99 days, 6:10:00	2 days, 3:13:00	1 day, 0:29:00	6 days, 4:02:00	10 days, 8:36:00	04:35:00	2 days, 10:38:00	05:25:00	05:38:00	22:29:00	01:04:00	00:40:00	01:07:00	02:38:00	URM1	EDJ2	Buccal
154 days, 14:55:00	101 days, 21:20:00	2 days, 5:34:00	1 day, 3:05:00	6 days, 9:28:00	10 days, 9:38:00	05:21:00	2 days, 9:21:00	06:11:00	06:51:00	22:08:00	01:06:00	00:41:00	01:07:00	02:35:00	URM1	EDJ2	Buccal
154 days, 22:21:00	98 days, 13:39:00	2 days, 4:33:00	1 day, 2:53:00	6 days, 8:13:00	10 days, 21:22:00	05:29:00	2 days, 13:01:00	07:19:00	06:47:00	23:37:00	01:04:00	00:41:00	01:10:00	02:45:00	URM1	EDJ2	Buccal
155 days, 6:29:00	102 days, 19:27:00	2 days, 10:07:00	1 day, 6:58:00	6 days, 10:15:00	11 days, 5:19:00	06:20:00	2 days, 16:03:00	09:29:00	06:33:00	23:46:00	01:07:00	00:42:00	01:13:00	02:53:00	URM1	EDJ2	Buccal
155 days, 13:55:00	99 days, 13:32:00	2 days, 6:31:00	1 day, 5:30:00	6 days, 13:59:00	10 days, 23:35:00	05:57:00	2 days, 13:07:00	10:40:00	07:08:00	23:17:00	01:05:00	00:43:00	01:11:00	02:44:00	URM1	EDJ2	Buccal
155 days, 21:22:00	96 days, 13:37:00	2 days, 8:25:00	1 day, 10:09:00	6 days, 23:39:00	10 days, 12:40:00	07:39:00	2 days, 14:15:00	13:13:00	07:11:00	23:29:00	01:03:00	00:45:00	01:08:00	02:47:00	URM1	EDJ2	Buccal
156 days, 5:28:00	107 days, 8:57:00	2 days, 12:22:00	1 day, 13:45:00	9 days, 15:38:00	10 days, 19:50:00	08:11:00	2 days, 17:13:00	14:35:00	08:58:00	1 day, 0:39:00	01:10:00	01:03:00	01:10:00	02:56:00	URM1	EDJ2	Buccal
156 days, 12:55:00	96 days, 7:01:00	2 days, 11:22:00	1 day, 14:34:00	8 days, 0:05:00	10 days, 1:08:00	09:35:00	2 days, 13:56:00	18:36:00	12:04:00	1 day, 0:11:00	01:02:00	00:52:00	01:05:00	02:46:00	URM1	EDJ2	Buccal
156 days, 20:21:00	101 days, 7:02:00	6 days, 5:51:00	2 days, 2:02:00	10 days, 12:06:00	10 days, 4:01:00	11:12:00	3 days, 3:44:00	1 day, 0:01:00	1 day, 1:28:00	23:56:00	01:06:00	01:08:00	01:06:00	03:24:00	URM1	EDJ2	Buccal

## Sheet: 5.Isotopic signal
Supplementary Data 5. Isotopic signal along the LA-MC-ICPMS tracks on the ULdi1 and URM1
Distance (µm)	87Sr/86Sr	84Sr/86Sr	85Rb/86Sr	Tooth	Laser track	Aspect	Days
36.0	49 days, 4:26:00	3 days, 22:28:00	07:00:00	ULdi1	EDJ2	lingual	-180
72.1	49 days, 4:12:00	3 days, 22:31:00	06:50:00	ULdi1	EDJ2	lingual	-178
108.1	49 days, 4:24:00	3 days, 22:23:00	06:25:00	ULdi1	EDJ2	lingual	-177
144.1	49 days, 4:25:00	3 days, 22:33:00	06:21:00	ULdi1	EDJ2	lingual	-175
180.2	49 days, 4:25:00	3 days, 22:33:00	06:03:00	ULdi1	EDJ2	lingual	-173
216.2	49 days, 4:18:00	3 days, 22:27:00	06:00:00	ULdi1	EDJ2	lingual	-172
252.2	49 days, 4:18:00	3 days, 22:40:00	05:59:00	ULdi1	EDJ2	lingual	-170
288.3	49 days, 4:20:00	3 days, 22:28:00	05:53:00	ULdi1	EDJ2	lingual	-168
324.3	49 days, 4:25:00	3 days, 22:34:00	05:45:00	ULdi1	EDJ2	lingual	-166
360.3	49 days, 4:20:00	3 days, 22:35:00	05:49:00	ULdi1	EDJ2	lingual	-164
396.4	49 days, 4:28:00	3 days, 22:36:00	05:36:00	ULdi1	EDJ2	lingual	-163
432.4	49 days, 4:38:00	3 days, 22:33:00	05:37:00	ULdi1	EDJ2	lingual	-161
468.4	49 days, 4:27:00	3 days, 22:39:00	05:32:00	ULdi1	EDJ2	lingual	-159
504.5	49 days, 4:32:00	3 days, 22:40:00	05:31:00	ULdi1	EDJ2	lingual	-157
540.5	49 days, 4:29:00	3 days, 22:32:00	05:34:00	ULdi1	EDJ2	lingual	-155
576.5	49 days, 4:23:00	3 days, 22:27:00	05:37:00	ULdi1	EDJ2	lingual	-153
612.6	49 days, 4:34:00	3 days, 22:31:00	05:38:00	ULdi1	EDJ2	lingual	-151
648.6	49 days, 4:26:00	3 days, 22:36:00	05:30:00	ULdi1	EDJ2	lingual	-149
684.6	49 days, 4:21:00	3 days, 22:37:00	05:27:00	ULdi1	EDJ2	lingual	-147
720.7	49 days, 4:39:00	3 days, 22:32:00	05:19:00	ULdi1	EDJ2	lingual	-145
756.7	49 days, 4:21:00	3 days, 22:34:00	05:19:00	ULdi1	EDJ2	lingual	-143
792.7	49 days, 4:33:00	3 days, 22:33:00	05:17:00	ULdi1	EDJ2	lingual	-141
828.8	49 days, 4:33:00	3 days, 22:39:00	05:14:00	ULdi1	EDJ2	lingual	-139
864.8	49 days, 4:39:00	3 days, 22:27:00	05:22:00	ULdi1	EDJ2	lingual	-137
900.8	49 days, 4:48:00	3 days, 22:31:00	05:10:00	ULdi1	EDJ2	lingual	-135
936.9	49 days, 4:40:00	3 days, 22:40:00	05:06:00	ULdi1	EDJ2	lingual	-133
972.9	49 days, 4:43:00	3 days, 22:36:00	05:09:00	ULdi1	EDJ2	lingual	-130
1008.9	49 days, 4:45:00	3 days, 22:33:00	05:07:00	ULdi1	EDJ2	lingual	-128
1045.0	49 days, 4:43:00	3 days, 22:39:00	05:30:00	ULdi1	EDJ2	lingual	-126
1081.0	49 days, 4:31:00	3 days, 22:37:00	05:07:00	ULdi1	EDJ2	lingual	-124
1117.0	49 days, 4:27:00	3 days, 22:38:00	05:12:00	ULdi1	EDJ2	lingual	-122
1153.1	49 days, 4:25:00	3 days, 22:30:00	05:12:00	ULdi1	EDJ2	lingual	-120
1189.1	49 days, 4:45:00	3 days, 22:41:00	05:08:00	ULdi1	EDJ2	lingual	-117
1225.1	49 days, 4:27:00	3 days, 22:45:00	05:07:00	ULdi1	EDJ2	lingual	-115
1261.2	49 days, 4:40:00	3 days, 22:41:00	05:07:00	ULdi1	EDJ2	lingual	-113
1297.2	49 days, 4:28:00	3 days, 22:31:00	05:06:00	ULdi1	EDJ2	lingual	-111
1333.2	49 days, 4:44:00	3 days, 22:38:00	05:14:00	ULdi1	EDJ2	lingual	-110
1369.3	49 days, 4:24:00	3 days, 22:36:00	05:13:00	ULdi1	EDJ2	lingual	-108
1405.3	49 days, 4:39:00	3 days, 22:45:00	05:27:00	ULdi1	EDJ2	lingual	-107
1441.4	49 days, 4:42:00	3 days, 22:41:00	05:21:00	ULdi1	EDJ2	lingual	-105
1477.4	49 days, 4:38:00	3 days, 22:42:00	05:18:00	ULdi1	EDJ2	lingual	-104
1513.4	49 days, 4:40:00	3 days, 22:34:00	05:23:00	ULdi1	EDJ2	lingual	-103
1549.5	49 days, 4:28:00	3 days, 22:37:00	05:26:00	ULdi1	EDJ2	lingual	-102
1585.5	49 days, 4:41:00	3 days, 22:45:00	05:26:00	ULdi1	EDJ2	lingual	-101
1621.5	49 days, 4:53:00	3 days, 22:45:00	06:22:00	ULdi1	EDJ2	lingual	-101
1657.6	49 days, 4:33:00	3 days, 22:33:00	05:17:00	ULdi1	EDJ2	lingual	-100
1693.6	49 days, 4:29:00	3 days, 22:33:00	05:30:00	ULdi1	EDJ2	lingual	-99
1729.6	49 days, 4:30:00	3 days, 22:30:00	05:30:00	ULdi1	EDJ2	lingual	-99
1765.7	49 days, 4:32:00	3 days, 22:38:00	05:29:00	ULdi1	EDJ2	lingual	-98
1801.7	49 days, 4:46:00	3 days, 22:28:00	05:55:00	ULdi1	EDJ2	lingual	-98
1837.7	49 days, 4:49:00	3 days, 22:38:00	05:27:00	ULdi1	EDJ2	lingual	-98
1873.8	49 days, 4:40:00	3 days, 22:37:00	05:31:00	ULdi1	EDJ2	lingual	-98
1909.8	49 days, 4:38:00	3 days, 22:30:00	05:40:00	ULdi1	EDJ2	lingual	-97
1945.8	49 days, 4:23:00	3 days, 22:33:00	05:25:00	ULdi1	EDJ2	lingual	-97
1981.9	49 days, 4:42:00	3 days, 22:31:00	05:28:00	ULdi1	EDJ2	lingual	-97
2017.9	49 days, 4:37:00	3 days, 22:33:00	05:30:00	ULdi1	EDJ2	lingual	-97
2053.9	49 days, 4:46:00	3 days, 22:35:00	05:34:00	ULdi1	EDJ2	lingual	-97
2090.0	49 days, 4:35:00	3 days, 22:25:00	05:36:00	ULdi1	EDJ2	lingual	-97
2126.0	49 days, 4:27:00	3 days, 22:32:00	05:39:00	ULdi1	EDJ2	lingual	-97
2162.0	49 days, 4:24:00	3 days, 22:22:00	05:53:00	ULdi1	EDJ2	lingual	-97
2198.1	49 days, 4:38:00	3 days, 22:30:00	05:43:00	ULdi1	EDJ2	lingual	-97
2234.1	49 days, 4:44:00	3 days, 22:42:00	05:45:00	ULdi1	EDJ2	lingual	-97
2270.1	49 days, 4:18:00	3 days, 22:27:00	05:43:00	ULdi1	EDJ2	lingual	-97
2306.2	49 days, 4:39:00	3 days, 22:32:00	05:45:00	ULdi1	EDJ2	lingual	-97
2342.2	49 days, 4:36:00	3 days, 22:36:00	05:32:00	ULdi1	EDJ2	lingual	-98
2378.2	49 days, 4:47:00	3 days, 22:34:00	05:39:00	ULdi1	EDJ2	lingual	-98
2414.3	49 days, 4:44:00	3 days, 22:27:00	05:37:00	ULdi1	EDJ2	lingual	-98
2450.3	49 days, 4:26:00	3 days, 22:29:00	05:50:00	ULdi1	EDJ2	lingual	-98
2486.3	49 days, 4:33:00	3 days, 22:43:00	07:21:00	ULdi1	EDJ2	lingual	-98
2522.4	49 days, 4:38:00	3 days, 22:30:00	05:55:00	ULdi1	EDJ2	lingual	-97
2558.4	49 days, 4:35:00	3 days, 22:32:00	05:28:00	ULdi1	EDJ2	lingual	-97
2594.4	49 days, 4:40:00	3 days, 22:32:00	05:28:00	ULdi1	EDJ2	lingual	-97
2630.5	49 days, 4:35:00	3 days, 22:30:00	05:26:00	ULdi1	EDJ2	lingual	-97
2666.5	49 days, 4:33:00	3 days, 22:29:00	05:28:00	ULdi1	EDJ2	lingual	-97
2702.5	49 days, 4:26:00	3 days, 22:29:00	05:38:00	ULdi1	EDJ2	lingual	-96
2738.6	49 days, 4:27:00	3 days, 22:29:00	05:36:00	ULdi1	EDJ2	lingual	-96
2774.6	49 days, 4:33:00	3 days, 22:31:00	06:44:00	ULdi1	EDJ2	lingual	-95
2810.6	49 days, 4:17:00	3 days, 22:26:00	06:23:00	ULdi1	EDJ2	lingual	-95
2846.7	49 days, 4:33:00	3 days, 22:31:00	05:46:00	ULdi1	EDJ2	lingual	-94
2882.7	49 days, 4:20:00	3 days, 22:33:00	06:44:00	ULdi1	EDJ2	lingual	-93
2918.7	49 days, 4:38:00	3 days, 22:38:00	06:54:00	ULdi1	EDJ2	lingual	-92
2954.8	49 days, 4:31:00	3 days, 22:34:00	06:25:00	ULdi1	EDJ2	lingual	-91
2990.8	49 days, 4:23:00	3 days, 22:26:00	06:34:00	ULdi1	EDJ2	lingual	-90
3026.8	49 days, 4:31:00	3 days, 22:30:00	06:25:00	ULdi1	EDJ2	lingual	-89
3062.9	49 days, 4:39:00	3 days, 22:35:00	06:09:00	ULdi1	EDJ2	lingual	-88
3098.9	49 days, 4:30:00	3 days, 22:36:00	08:46:00	ULdi1	EDJ2	lingual	-87
3134.9	49 days, 4:20:00	3 days, 22:28:00	07:10:00	ULdi1	EDJ2	lingual	-85
3171.0	49 days, 4:40:00	3 days, 22:33:00	06:26:00	ULdi1	EDJ2	lingual	-84
3207.0	49 days, 4:25:00	3 days, 22:39:00	08:32:00	ULdi1	EDJ2	lingual	-82
3243.0	49 days, 4:26:00	3 days, 22:30:00	06:26:00	ULdi1	EDJ2	lingual	-81
3279.1	49 days, 4:26:00	3 days, 22:30:00	07:08:00	ULdi1	EDJ2	lingual	-79
3315.1	49 days, 4:15:00	3 days, 22:29:00	06:23:00	ULdi1	EDJ2	lingual	-77
3351.1	49 days, 4:39:00	3 days, 22:32:00	06:32:00	ULdi1	EDJ2	lingual	-76
3387.2	49 days, 4:39:00	3 days, 22:36:00	06:45:00	ULdi1	EDJ2	lingual	-74
3423.2	49 days, 4:39:00	3 days, 22:32:00	06:08:00	ULdi1	EDJ2	lingual	-72
3459.2	49 days, 4:50:00	3 days, 22:40:00	06:17:00	ULdi1	EDJ2	lingual	-71
3495.3	49 days, 4:23:00	3 days, 22:34:00	06:17:00	ULdi1	EDJ2	lingual	-69
3531.3	49 days, 4:34:00	3 days, 22:30:00	06:17:00	ULdi1	EDJ2	lingual	-67
3567.3	49 days, 4:38:00	3 days, 22:37:00	06:14:00	ULdi1	EDJ2	lingual	-66
3603.4	49 days, 4:35:00	3 days, 22:36:00	06:27:00	ULdi1	EDJ2	lingual	-64
3639.4	49 days, 4:34:00	3 days, 22:30:00	06:08:00	ULdi1	EDJ2	lingual	-63
3675.4	49 days, 4:22:00	3 days, 22:42:00	06:23:00	ULdi1	EDJ2	lingual	-61
3711.5	49 days, 4:47:00	3 days, 22:32:00	06:11:00	ULdi1	EDJ2	lingual	-60
3747.5	49 days, 4:22:00	3 days, 22:26:00	06:20:00	ULdi1	EDJ2	lingual	-58
3783.5	49 days, 4:44:00	3 days, 22:28:00	06:24:00	ULdi1	EDJ2	lingual	-57
3819.6	49 days, 4:32:00	3 days, 22:36:00	06:25:00	ULdi1	EDJ2	lingual	-55
3855.6	49 days, 4:35:00	3 days, 22:31:00	06:34:00	ULdi1	EDJ2	lingual	-54
3891.6	49 days, 4:32:00	3 days, 22:30:00	06:31:00	ULdi1	EDJ2	lingual	-52
3927.7	49 days, 4:38:00	3 days, 22:39:00	06:23:00	ULdi1	EDJ2	lingual	-51
3963.7	49 days, 4:37:00	3 days, 22:35:00	06:31:00	ULdi1	EDJ2	lingual	-49
3999.7	49 days, 4:13:00	3 days, 22:31:00	06:28:00	ULdi1	EDJ2	lingual	-48
4035.8	49 days, 4:34:00	3 days, 22:37:00	06:33:00	ULdi1	EDJ2	lingual	-47
4071.8	49 days, 4:32:00	3 days, 22:29:00	06:35:00	ULdi1	EDJ2	lingual	-45
4107.8	49 days, 4:34:00	3 days, 22:39:00	06:39:00	ULdi1	EDJ2	lingual	-44
4143.9	49 days, 4:48:00	3 days, 22:33:00	06:37:00	ULdi1	EDJ2	lingual	-43
4179.9	49 days, 4:39:00	3 days, 22:33:00	06:35:00	ULdi1	EDJ2	lingual	-42
4215.9	49 days, 4:33:00	3 days, 22:25:00	06:39:00	ULdi1	EDJ2	lingual	-41
4252.0	49 days, 4:27:00	3 days, 22:25:00	06:38:00	ULdi1	EDJ2	lingual	-40
4288.0	49 days, 4:28:00	3 days, 22:27:00	06:32:00	ULdi1	EDJ2	lingual	-38
4324.1	49 days, 4:27:00	3 days, 22:31:00	06:44:00	ULdi1	EDJ2	lingual	-37
4360.1	49 days, 4:19:00	3 days, 22:29:00	06:36:00	ULdi1	EDJ2	lingual	-36
4396.1	49 days, 4:57:00	3 days, 22:26:00	06:27:00	ULdi1	EDJ2	lingual	-35
4432.2	49 days, 4:33:00	3 days, 22:31:00	06:39:00	ULdi1	EDJ2	lingual	-34
4468.2	49 days, 4:48:00	3 days, 22:32:00	06:30:00	ULdi1	EDJ2	lingual	-34
4504.2	49 days, 4:55:00	3 days, 22:37:00	06:29:00	ULdi1	EDJ2	lingual	-33
4540.3	49 days, 4:31:00	3 days, 22:22:00	06:40:00	ULdi1	EDJ2	lingual	-32
4576.3	49 days, 4:36:00	3 days, 22:29:00	06:50:00	ULdi1	EDJ2	lingual	-31
4612.3	49 days, 4:24:00	3 days, 22:37:00	06:51:00	ULdi1	EDJ2	lingual	-30
4648.4	49 days, 4:32:00	3 days, 22:33:00	07:04:00	ULdi1	EDJ2	lingual	-29
4684.4	49 days, 4:35:00	3 days, 22:34:00	07:03:00	ULdi1	EDJ2	lingual	-27
4720.4	49 days, 4:33:00	3 days, 22:37:00	07:10:00	ULdi1	EDJ2	lingual	-26
4756.5	49 days, 4:43:00	3 days, 22:34:00	06:59:00	ULdi1	EDJ2	lingual	-25
4792.5	49 days, 4:30:00	3 days, 22:29:00	06:53:00	ULdi1	EDJ2	lingual	-24
4828.5	49 days, 4:22:00	3 days, 22:29:00	06:58:00	ULdi1	EDJ2	lingual	-23
4864.6	49 days, 4:36:00	3 days, 22:32:00	06:54:00	ULdi1	EDJ2	lingual	-22
4900.6	49 days, 4:13:00	3 days, 22:32:00	07:02:00	ULdi1	EDJ2	lingual	-20
4936.6	49 days, 4:29:00	3 days, 22:28:00	06:58:00	ULdi1	EDJ2	lingual	-19
4972.7	49 days, 4:27:00	3 days, 22:26:00	06:57:00	ULdi1	EDJ2	lingual	-17
5008.7	49 days, 4:31:00	3 days, 22:33:00	06:49:00	ULdi1	EDJ2	lingual	-16
5044.7	49 days, 4:25:00	3 days, 22:34:00	06:45:00	ULdi1	EDJ2	lingual	-14
5080.8	49 days, 4:26:00	3 days, 22:22:00	06:51:00	ULdi1	EDJ2	lingual	-13
5116.8	49 days, 4:32:00	3 days, 22:28:00	06:56:00	ULdi1	EDJ2	lingual	-11
5152.8	49 days, 4:50:00	3 days, 22:34:00	06:56:00	ULdi1	EDJ2	lingual	-10
5188.9	49 days, 4:28:00	3 days, 22:37:00	07:05:00	ULdi1	EDJ2	lingual	-8
5224.9	49 days, 4:31:00	3 days, 22:30:00	07:06:00	ULdi1	EDJ2	lingual	-6
5260.9	49 days, 4:42:00	3 days, 22:32:00	06:59:00	ULdi1	EDJ2	lingual	-4
5297.0	49 days, 4:30:00	3 days, 22:20:00	07:04:00	ULdi1	EDJ2	lingual	-3
5333.0	49 days, 4:24:00	3 days, 22:33:00	07:12:00	ULdi1	EDJ2	lingual	-1
5369.0	49 days, 4:36:00	3 days, 22:25:00	07:04:00	ULdi1	EDJ2	lingual	1
5405.1	49 days, 4:31:00	3 days, 22:32:00	07:08:00	ULdi1	EDJ2	lingual	2
5441.1	49 days, 4:22:00	3 days, 22:37:00	07:16:00	ULdi1	EDJ2	lingual	4
5477.1	49 days, 4:24:00	3 days, 22:43:00	08:27:00	ULdi1	EDJ2	lingual	6
5513.2	49 days, 4:34:00	3 days, 22:29:00	07:06:00	ULdi1	EDJ2	lingual	8
5549.2	49 days, 4:19:00	3 days, 22:32:00	07:10:00	ULdi1	EDJ2	lingual	10
5585.2	49 days, 4:38:00	3 days, 22:35:00	07:08:00	ULdi1	EDJ2	lingual	11
5621.3	49 days, 4:32:00	3 days, 22:25:00	07:09:00	ULdi1	EDJ2	lingual	13
5657.3	49 days, 4:31:00	3 days, 22:21:00	07:26:00	ULdi1	EDJ2	lingual	15
5693.3	49 days, 4:31:00	3 days, 22:34:00	07:23:00	ULdi1	EDJ2	lingual	17
5729.4	49 days, 4:37:00	3 days, 22:31:00	06:42:00	ULdi1	EDJ2	lingual	19
5765.4	49 days, 4:35:00	3 days, 22:34:00	06:37:00	ULdi1	EDJ2	lingual	21
5801.4	49 days, 4:35:00	3 days, 22:27:00	06:36:00	ULdi1	EDJ2	lingual	23
5837.5	49 days, 4:55:00	3 days, 22:35:00	06:27:00	ULdi1	EDJ2	lingual	25
5873.5	49 days, 4:33:00	3 days, 22:36:00	06:32:00	ULdi1	EDJ2	lingual	27
5909.5	49 days, 4:44:00	3 days, 22:32:00	06:21:00	ULdi1	EDJ2	lingual	29
5945.6	49 days, 4:55:00	3 days, 22:34:00	06:19:00	ULdi1	EDJ2	lingual	31
5981.6	49 days, 4:47:00	3 days, 22:32:00	06:25:00	ULdi1	EDJ2	lingual	34
6017.6	49 days, 4:47:00	3 days, 22:37:00	06:42:00	ULdi1	EDJ2	lingual	36
6053.7	49 days, 4:49:00	3 days, 22:26:00	06:24:00	ULdi1	EDJ2	lingual	38
6089.7	49 days, 4:32:00	3 days, 22:28:00	06:53:00	ULdi1	EDJ2	lingual	40
6125.7	49 days, 4:31:00	3 days, 22:29:00	06:28:00	ULdi1	EDJ2	lingual	42
6161.8	49 days, 4:21:00	3 days, 22:28:00	06:30:00	ULdi1	EDJ2	lingual	45
6197.8	49 days, 4:30:00	3 days, 22:31:00	06:37:00	ULdi1	EDJ2	lingual	47
6233.8	49 days, 4:47:00	3 days, 22:27:00	06:36:00	ULdi1	EDJ2	lingual	49
36.0	49 days, 5:18:00	3 days, 22:19:00	01:47:00	ULdi1	P1	buccal
72.1	49 days, 5:26:00	3 days, 22:23:00	01:36:00	ULdi1	P1	buccal
108.1	49 days, 4:42:00	3 days, 22:22:00	12:02:00	ULdi1	P1	buccal
144.1	49 days, 5:09:00	3 days, 22:19:00	06:51:00	ULdi1	P1	buccal
180.2	49 days, 4:55:00	3 days, 22:24:00	07:51:00	ULdi1	P1	buccal
216.2	49 days, 4:54:00	3 days, 22:20:00	11:43:00	ULdi1	P1	buccal
252.2	49 days, 5:06:00	3 days, 22:20:00	11:16:00	ULdi1	P1	buccal
288.3	49 days, 4:33:00	3 days, 22:24:00	16:42:00	ULdi1	P1	buccal
324.3	49 days, 5:03:00	3 days, 22:19:00	09:31:00	ULdi1	P1	buccal
360.3	49 days, 5:01:00	3 days, 22:22:00	09:48:00	ULdi1	P1	buccal
396.4	49 days, 5:01:00	3 days, 22:25:00	08:23:00	ULdi1	P1	buccal
432.4	49 days, 4:53:00	3 days, 22:21:00	08:45:00	ULdi1	P1	buccal
468.4	49 days, 4:49:00	3 days, 22:23:00	13:16:00	ULdi1	P1	buccal
504.5	49 days, 4:50:00	3 days, 22:17:00	11:48:00	ULdi1	P1	buccal
540.5	49 days, 5:06:00	3 days, 22:17:00	09:02:00	ULdi1	P1	buccal
576.5	49 days, 5:00:00	3 days, 22:18:00	09:21:00	ULdi1	P1	buccal
612.6	49 days, 4:46:00	3 days, 22:19:00	11:54:00	ULdi1	P1	buccal
648.6	49 days, 5:12:00	3 days, 22:16:00	06:25:00	ULdi1	P1	buccal
684.6	49 days, 5:03:00	3 days, 22:19:00	07:09:00	ULdi1	P1	buccal
720.7	49 days, 5:06:00	3 days, 22:19:00	04:22:00	ULdi1	P1	buccal
756.7	49 days, 5:25:00	3 days, 22:19:00	02:43:00	ULdi1	P1	buccal
792.7	49 days, 5:08:00	3 days, 22:16:00	03:43:00	ULdi1	P1	buccal
828.7	49 days, 5:10:00	3 days, 22:16:00	04:05:00	ULdi1	P1	buccal
864.8	49 days, 5:07:00	3 days, 22:20:00	05:47:00	ULdi1	P1	buccal
900.8	49 days, 4:51:00	3 days, 22:20:00	09:25:00	ULdi1	P1	buccal
936.8	49 days, 4:19:00	3 days, 22:22:00	14:16:00	ULdi1	P1	buccal
972.9	49 days, 4:29:00	3 days, 22:28:00	07:13:00	ULdi1	P1	buccal	-185
1008.9	49 days, 4:19:00	3 days, 22:28:00	06:59:00	ULdi1	P1	buccal	-171
1044.9	49 days, 4:18:00	3 days, 22:24:00	06:59:00	ULdi1	P1	buccal	-159
1081.0	49 days, 4:36:00	3 days, 22:25:00	06:47:00	ULdi1	P1	buccal	-145
1117.0	49 days, 4:17:00	3 days, 22:33:00	07:02:00	ULdi1	P1	buccal	-134
1153.0	49 days, 4:39:00	3 days, 22:38:00	07:12:00	ULdi1	P1	buccal	-126
1189.1	49 days, 4:33:00	3 days, 22:28:00	07:45:00	ULdi1	P1	buccal	-118
1225.1	49 days, 4:28:00	3 days, 22:30:00	07:43:00	ULdi1	P1	buccal	-111
1261.1	49 days, 4:30:00	3 days, 22:32:00	08:27:00	ULdi1	P1	buccal	-104
1297.2	49 days, 4:21:00	3 days, 22:31:00	09:50:00	ULdi1	P1	buccal	-96
1333.2	49 days, 4:39:00	3 days, 22:37:00	12:32:00	ULdi1	P1	buccal	-89
1 day, 17:25:00	49 days, 4:28:00	3 days, 22:25:00	10:50:00	URM1	EDJ2	lingual
3 days, 1:05:00	49 days, 4:40:00	3 days, 22:22:00	08:30:00	URM1	EDJ2	lingual
5 days, 4:15:00	49 days, 4:54:00	3 days, 22:24:00	06:33:00	URM1	EDJ2	lingual	39
6 days, 0:13:00	49 days, 4:07:00	3 days, 22:23:00	20:10:00	URM1	EDJ2	lingual	40
8 days, 15:05:00	49 days, 3:47:00	3 days, 22:26:00	1 day, 8:30:00	URM1	EDJ2	lingual	42
9 days, 3:15:00	49 days, 3:56:00	3 days, 22:26:00	23:51:00	URM1	EDJ2	lingual	43
12 days, 1:55:00	49 days, 3:14:00	3 days, 22:22:00	1 day, 13:57:00	URM1	EDJ2	lingual	44
12 days, 0:26:00	49 days, 4:19:00	3 days, 22:29:00	18:05:00	URM1	EDJ2	lingual	45
15 days, 12:45:00	49 days, 4:32:00	3 days, 22:22:00	11:01:00	URM1	EDJ2	lingual	46
15 days, 5:25:00	49 days, 4:31:00	3 days, 22:25:00	06:20:00	URM1	EDJ2	lingual	48
18 days, 23:35:00	49 days, 4:48:00	3 days, 22:22:00	06:25:00	URM1	EDJ2	lingual	49
18 days, 0:39:00	49 days, 4:42:00	3 days, 22:27:00	06:37:00	URM1	EDJ2	lingual	50
22 days, 10:25:00	49 days, 4:44:00	3 days, 22:22:00	07:30:00	URM1	EDJ2	lingual	52
21 days, 7:35:00	49 days, 4:20:00	3 days, 22:18:00	16:55:00	URM1	EDJ2	lingual	53
25 days, 21:15:00	49 days, 4:04:00	3 days, 22:21:00	20:42:00	URM1	EDJ2	lingual	55
24 days, 0:52:00	49 days, 4:01:00	3 days, 22:23:00	21:59:00	URM1	EDJ2	lingual	56
29 days, 8:05:00	49 days, 4:38:00	3 days, 22:24:00	11:31:00	URM1	EDJ2	lingual	58
27 days, 9:45:00	49 days, 4:45:00	3 days, 22:23:00	12:27:00	URM1	EDJ2	lingual	59
32 days, 18:55:00	49 days, 4:19:00	3 days, 22:20:00	16:20:00	URM1	EDJ2	lingual	61
30 days, 1:05:00	49 days, 3:48:00	3 days, 22:18:00	1 day, 8:10:00	URM1	EDJ2	lingual	62
36 days, 5:45:00	49 days, 3:29:00	3 days, 22:20:00	1 day, 12:49:00	URM1	EDJ2	lingual	64
33 days, 11:55:00	49 days, 3:18:00	3 days, 22:19:00	1 day, 21:01:00	URM1	EDJ2	lingual	65
39 days, 16:35:00	49 days, 3:49:00	3 days, 22:12:00	1 day, 3:27:00	URM1	EDJ2	lingual	67
36 days, 1:18:00	49 days, 3:51:00	3 days, 22:17:00	1 day, 8:57:00	URM1	EDJ2	lingual	68
43 days, 3:25:00	49 days, 2:57:00	3 days, 22:20:00	1 day, 22:30:00	URM1	EDJ2	lingual	70
39 days, 14:05:00	49 days, 3:22:00	3 days, 22:27:00	1 day, 12:13:00	URM1	EDJ2	lingual	72
46 days, 14:15:00	49 days, 3:11:00	3 days, 22:17:00	1 day, 16:35:00	URM1	EDJ2	lingual	73
42 days, 1:31:00	49 days, 2:43:00	3 days, 22:20:00	2 days, 9:19:00	URM1	EDJ2	lingual	75
50 days, 1:05:00	49 days, 2:16:00	3 days, 22:14:00	2 days, 16:06:00	URM1	EDJ2	lingual	76
45 days, 16:15:00	49 days, 1:41:00	3 days, 22:20:00	3 days, 9:48:00	URM1	EDJ2	lingual	78
46 days, 14:15:00	49 days, 0:59:00	3 days, 22:18:00	3 days, 19:48:00	URM1	EDJ2	lingual	80
48 days, 1:04:00	49 days, 1:18:00	3 days, 22:15:00	3 days, 14:07:00	URM1	EDJ2	lingual	82
50 days, 1:05:00	49 days, 2:42:00	3 days, 22:20:00	2 days, 9:22:00	URM1	EDJ2	lingual	84
51 days, 2:45:00	49 days, 2:48:00	3 days, 22:21:00	2 days, 9:02:00	URM1	EDJ2	lingual	85
53 days, 11:55:00	49 days, 2:05:00	3 days, 22:14:00	3 days, 0:18:00	URM1	EDJ2	lingual	88
54 days, 1:17:00			8 days, 20:44:00	URM1	EDJ2	lingual	90
56 days, 22:45:00			43 days, 16:12:00	URM1	EDJ2	lingual	92
57 days, 4:55:00			10 days, 19:37:00	URM1	EDJ2	lingual	94
60 days, 9:35:00	49 days, 1:03:00	3 days, 22:22:00	3 days, 18:46:00	URM1	EDJ2	lingual	97
1441.3	49 days, 2:17:00	3 days, 22:24:00	2 days, 18:47:00	URM1	EDJ2	lingual	99
63 days, 20:25:00	49 days, 2:24:00	3 days, 22:17:00	2 days, 18:04:00	URM1	EDJ2	lingual	102
63 days, 7:05:00	49 days, 1:43:00	3 days, 22:16:00	3 days, 7:27:00	URM1	EDJ2	lingual	104
67 days, 7:15:00	49 days, 2:04:00	3 days, 22:20:00	3 days, 1:26:00	URM1	EDJ2	lingual	106
66 days, 1:43:00	49 days, 0:54:00	3 days, 22:16:00	4 days, 1:27:00	URM1	EDJ2	lingual	109
70 days, 18:05:00	49 days, 0:55:00	3 days, 22:13:00	4 days, 6:46:00	URM1	EDJ2	lingual	111
69 days, 9:15:00	49 days, 1:40:00	3 days, 22:26:00	3 days, 10:33:00	URM1	EDJ2	lingual	114
74 days, 4:55:00	49 days, 1:45:00	3 days, 22:20:00	3 days, 10:52:00	URM1	EDJ2	lingual	117
72 days, 1:56:00	49 days, 1:00:00	3 days, 22:16:00	4 days, 1:03:00	URM1	EDJ2	lingual	120
77 days, 15:45:00	49 days, 0:37:00	3 days, 22:16:00	4 days, 5:16:00	URM1	EDJ2	lingual	123
75 days, 11:25:00	49 days, 0:34:00	3 days, 22:20:00	4 days, 16:14:00	URM1	EDJ2	lingual	127
81 days, 2:35:00	49 days, 0:16:00	3 days, 22:17:00	4 days, 15:50:00	URM1	EDJ2	lingual	131
78 days, 2:09:00	49 days, 0:54:00	3 days, 22:21:00	4 days, 6:46:00	URM1	EDJ2	lingual	136
84 days, 13:25:00	48 days, 23:38:00	3 days, 22:14:00	5 days, 10:00:00	URM1	EDJ2	lingual	140
81 days, 13:35:00	48 days, 23:02:00	3 days, 22:12:00	6 days, 1:03:00	URM1	EDJ2	lingual	145
88 days, 0:15:00	48 days, 23:04:00	3 days, 22:04:00	5 days, 17:46:00	URM1	EDJ2	lingual	150
84 days, 2:22:00	48 days, 23:31:00	3 days, 22:17:00	5 days, 8:07:00	URM1	EDJ2	lingual	155
91 days, 11:05:00	48 days, 22:51:00	3 days, 22:14:00	6 days, 0:38:00	URM1	EDJ2	lingual	160
87 days, 15:45:00	48 days, 22:43:00	3 days, 22:15:00	6 days, 11:30:00	URM1	EDJ2	lingual	166
94 days, 21:55:00	48 days, 21:33:00	3 days, 22:20:00	7 days, 6:38:00	URM1	EDJ2	lingual	172
90 days, 2:35:00	48 days, 21:57:00	3 days, 22:14:00	7 days, 3:06:00	URM1	EDJ2	lingual	178
98 days, 8:45:00	48 days, 22:55:00	3 days, 22:08:00	6 days, 6:11:00	URM1	EDJ2	lingual	184
93 days, 2:15:00	48 days, 22:45:00	3 days, 22:08:00	6 days, 3:19:00	URM1	EDJ2	lingual	189
94 days, 21:55:00	48 days, 20:16:00	3 days, 22:08:00	8 days, 17:22:00	URM1	EDJ2	lingual	196
96 days, 2:08:00			12 days, 23:37:00	URM1	EDJ2	lingual	202
98 days, 8:45:00			11 days, 23:06:00	URM1	EDJ2	lingual	208
99 days, 4:25:00			62 days, 22:40:00	URM1	EDJ2	lingual	215
101 days, 19:35:00			14 days, 16:59:00	URM1	EDJ2	lingual	221
102 days, 2:21:00			9 days, 9:19:00	URM1	EDJ2	lingual	227
105 days, 6:25:00			10 days, 10:46:00	URM1	EDJ2	lingual	233
105 days, 6:35:00			13 days, 16:04:00	URM1	EDJ2	lingual	239
108 days, 17:15:00			32 days, 22:53:00	URM1	EDJ2	lingual	244
108 days, 2:34:00	48 days, 18:32:00	3 days, 22:08:00	10 days, 5:09:00	URM1	EDJ2	lingual	250
112 days, 4:05:00	48 days, 22:00:00	3 days, 22:04:00	6 days, 22:45:00	URM1	EDJ2	lingual	255
111 days, 8:45:00	48 days, 21:22:00	3 days, 22:17:00	7 days, 13:25:00	URM1	EDJ2	lingual	261
115 days, 14:55:00	48 days, 20:09:00	3 days, 22:00:00	8 days, 12:23:00	URM1	EDJ2	lingual	267
114 days, 2:47:00	48 days, 22:06:00	3 days, 22:18:00	6 days, 20:12:00	URM1	EDJ2	lingual	274
119 days, 1:45:00	48 days, 22:06:00	3 days, 21:59:00	6 days, 23:16:00	URM1	EDJ2	lingual	281
117 days, 10:55:00	48 days, 22:03:00	3 days, 22:03:00	7 days, 0:12:00	URM1	EDJ2	lingual	289
122 days, 12:35:00	48 days, 22:07:00	3 days, 22:06:00	6 days, 19:18:00	URM1	EDJ2	lingual	297
2882.6	48 days, 22:39:00	3 days, 22:07:00	6 days, 9:55:00	URM1	EDJ2	lingual	305
125 days, 23:25:00	48 days, 22:09:00	3 days, 22:00:00	6 days, 18:46:00	URM1	EDJ2	lingual	314
123 days, 13:05:00	48 days, 21:30:00	3 days, 22:02:00	7 days, 7:46:00	URM1	EDJ2	lingual	323
129 days, 10:15:00	48 days, 20:59:00	3 days, 21:59:00	7 days, 20:42:00	URM1	EDJ2	lingual	333
126 days, 3:13:00	48 days, 23:11:00	3 days, 22:07:00	5 days, 16:11:00	URM1	EDJ2	lingual	343
132 days, 21:05:00	48 days, 23:48:00	3 days, 22:01:00	5 days, 1:56:00	URM1	EDJ2	lingual	352
129 days, 15:15:00	48 days, 21:29:00	3 days, 22:00:00	7 days, 9:55:00	URM1	EDJ2	lingual	362
136 days, 7:55:00	48 days, 20:02:00	3 days, 21:59:00	8 days, 19:12:00	URM1	EDJ2	lingual	372
132 days, 3:26:00	48 days, 19:18:00	3 days, 21:59:00	9 days, 6:16:00	URM1	EDJ2	lingual	381
139 days, 18:45:00	48 days, 22:35:00	3 days, 22:03:00	6 days, 5:52:00	URM1	EDJ2	lingual	391
135 days, 17:25:00	48 days, 23:19:00	3 days, 21:57:00	5 days, 20:29:00	URM1	EDJ2	lingual	401
143 days, 5:35:00	48 days, 17:26:00	3 days, 21:55:00	11 days, 5:48:00	URM1	EDJ2	lingual	411
138 days, 3:39:00	48 days, 16:24:00	3 days, 21:43:00	12 days, 16:25:00	URM1	EDJ2	lingual	421
139 days, 18:45:00	48 days, 18:19:00	3 days, 22:04:00	10 days, 12:11:00	URM1	EDJ2	lingual	431
141 days, 3:55:00	48 days, 19:23:00	3 days, 21:50:00	9 days, 13:04:00	URM1	EDJ2	lingual	441
143 days, 5:35:00			19 days, 20:09:00	URM1	EDJ2	lingual	451
144 days, 3:12:00			26 days, 5:49:00	URM1	EDJ2	lingual	461
146 days, 16:25:00			17 days, 12:20:00	URM1	EDJ2	lingual	471
147 days, 6:05:00			14 days, 0:20:00	URM1	EDJ2	lingual

## Sheet: 6.Shotgun Results
Supplementary Data 6. Mapping statistics on the hg19 human reference genome
Sample Name	# of Raw Reads prior Clip & Merge (C&M)	# reads after C&M prior mapping	# of Merged Reads	% Merged Reads	# mapped reads prior RMDup	# mapped reads prior RMDup QF	# of Duplicates removed	Mapped Reads after RMDup	Endogenous DNA (%)	Endogenous DNA QF (%)	Cluster Factor	Mean Coverage	std. dev. Coverage	Coverage >= 1X in %	Coverage >= 2X in %	Coverage >= 3X in %	# of reads on mitochondrium	AVG Coverage on mitochondrium	MT/NUC Ratio	DMG 1st Base 3'	DMG 1st Base 5'	average fragment length	GC content in %	SNPs sites covered in 1240K panel
Le Mura 1 Light-shotgun	10834630	5348087	3673261	68.68	824966	614960	91595	523365	22.459	16.742	1.175	0.0078	0.0886	0.77	0	0	82	0.236949	30.49	0.1719	0.1737	47.78	41.25	-
Le Mura 1 Deep-shotgun	8586847752	4173002012	2854042970	68.39	627998137	483049378	339175460	143873918	22.003	16.922	3.36	2.2134	2.6732	75.26	57.52	38.98	19517	55.8662	25.24	0.1681	0.1687	47.72	41.35	1080593
Negative Control - Extraction	75960	18919	900	4.76	215	146	0	146	NaN	NaN	1	0	0	0	0	0	0	NaN	0	0	0	65.92	42.56	-
Negative Control - Library	43410	11143	116	1.04	13	8	2	6	NaN	NaN	1.33	0	0	0	0	0	0	NaN	0	0	0	60.17	45.98	-

## Sheet: 7.Contamination Estimation
Supplementary Data 7. Contamination estimation on nuclear genome
Nakatsuka et al., 2020
Sample_ID	ContamLD_DamCorr_Estimate	ContamLD_DamCorr_Estimate_se	K_score	K_score_se	Damage_Ratio	Panel	Panel_Type	Warnings
Le Mura 1	-0.076	0.013	0.005	0.018	0.273753	FIN	1240K	Model_Misspecified
Korneliussen et al., 2014
SNPs sites: 13575, with flanking: 122175
Mismatch_rate_for_flanking:0.000863 MisMatch_rate_for_snpsite:0.002769
Method1: old_llh Version: MoM:0.005393 SE(MoM):8.373928e-04 ML:0.005045 SE(ML):1.540065e-13
Method1: new_llh Version: MoM:0.005385 SE(MoM):8.384279e-04 ML:0.005043 SE(ML):1.208608e-13
Method2: old_llh Version: MoM:0.005179 SE(MoM):1.298219e-03 ML:0.005364 SE(ML):1.020647e-14
Method2: new_llh Version: MoM:0.005172 SE(MoM):1.299559e-03 ML:0.005360 SE(ML):1.717921e-15
Refernces
Nakatsuka, N., Harney, É., Mallick, S. et al. 2020. ContamLD: estimation of ancient nuclear DNA contamination using breakdown of linkage disequilibrium. Genome Biol 21, 199 (2020)
Korneliussen, T. S., Albrechtsen, A. & Nielsen, R. 2014. ANGSD: Analysis of Next Generation Sequencing Data. BMC Bioinformatics 15, 356

## Sheet: 8.Sex determination
Supplementary Data 8. Biological sex identification results
Skoglund et al. 2013
Sample ID	Nseqs	NchrY+NchrX	NchrY	R_y [SE]	95% CI	Assignment
Le Mura 1	143873732	3965520	318993	0.0804 [0.0001]	0.0802-0.0807	XY
Mittnik et al. 2016
Sample ID	Rx	95% CI	Assignment
Le Mura 1	0.4965853	0.4735-0.5197	XY
Sex DetERRmine*
#Sample	#SnpsAut	#SNPsX	#SnpsY	NrAut	NrX	NrY	x-rate	y-rate	Err(x-rate)	Err(y-rate)
Le Mura 1	2232743732	93894950	8142959	6674175716	175470226	15623466	0.625176209237142	0.64185419041956	4.78E-05	0.000162575616619959
References
Mittnik A, Wang CC, Svoboda J, Krause J. 2016. A Molecular Approach to the Sexing of the Triple Burial at the Upper Paleolithic Site of Dolní Věstonice. PLoS 11(10):e0163019
Skoglund, P., Storå, J., Götherström, A. & Jakobsson, M. 2013. Accurate sex identification of ancient human remains using DNA shotgun sequencing. J. Archaeol. Sci. 40, 4477–4482
*https://github.com/TCLamnidis/Sex.DetERRmine

## Sheet: 9.Y-Chromosome Variants
Supplementary Data 9. Y chromosome variants identified using Yleaf v2.0 software
Haplogroup	Mutation	anc	der	reads	called_perc	called_base	state
A0	G->T	G	T	3	100	G	A
A0	C->A	C	A	2	100	C	A
A0	A->G	A	G	6	100	A	A
A0	C->T	C	T	3	100	C	A
A0	G->A	G	A	3	100	G	A
A0	A->C	A	C	3	100	A	A
A0	C->T	C	T	3	100	C	A
A0	G->C	G	C	2	100	G	A
A0-T	T->C	T	C	2	100	C	D
A0-T	T->G	T	G	4	100	G	D
A0-T	C->T	C	T	2	100	T	D
A0-T	G->A	G	A	2	100	A	D
A0-T	G->T	G	T	2	100	T	D
A0-T	T->C	T	C	2	100	C	D
A0-T	C->T	C	T	5	100	T	D
A0-T	C->T	C	T	4	100	T	D
A00	T->C	T	C	3	100	T	A
A00	G->C	G	C	2	100	G	A
A00	C->T	C	T	3	100	C	A
A00	C->G	C	G	3	100	C	A
A00	C->A	C	A	2	100	C	A
A00	G->A	G	A	2	100	G	A
A00	A->T	A	T	5	100	A	A
A00	G->A	G	A	2	100	G	A
A00	A->T	A	T	3	100	A	A
A00	C->T	C	T	3	100	C	A
A00	C->A	C	A	3	100	C	A
A00	G->A	G	A	4	100	G	A
A00	C->T	C	T	2	100	C	A
A00	T->C	T	C	2	100	T	A
A00	A->G	A	G	4	100	A	A
A00	C->A	C	A	4	100	C	A
A00	G->A	G	A	2	100	G	A
A00	G->A	G	A	2	100	G	A
A00	A->G	A	G	4	100	A	A
A00	C->T	C	T	3	100	C	A
A00	T->C	T	C	2	100	T	A
A00	C->T	C	T	4	100	C	A
A00	C->T	C	T	2	100	C	A
A00	T->C	T	C	3	100	T	A
A00	C->G	C	G	2	100	C	A
A00	C->A	C	A	2	100	C	A
A00	G->A	G	A	2	100	G	A
A00	A->G	A	G	4	100	A	A
A00	G->C	G	C	2	100	G	A
A00	A->G	A	G	5	100	A	A
A00	A->C	A	C	2	100	A	A
A00	A->G	A	G	6	100	A	A
A00	A->G	A	G	2	100	A	A
A00	A->G	A	G	3	100	A	A
A00	G->C	G	C	2	100	G	A
A00	T->C	T	C	2	100	T	A
A00	A->G	A	G	2	100	A	A
A00	T->A	T	A	2	100	T	A
A00	G->A	G	A	2	100	G	A
A00	C->G	C	G	7	100	C	A
A00	A->G	A	G	2	100	A	A
A00	G->A	G	A	4	100	G	A
A00	G->A	G	A	3	100	G	A
A00	T->C	T	C	2	100	T	A
A00	A->G	A	G	2	100	A	A
A00	C->A	C	A	3	100	C	A
A00	C->T	C	T	2	100	C	A
A00	C->T	C	T	4	100	C	A
A00	G->A	G	A	2	100	G	A
A00	A->G	A	G	2	100	A	A
A00	A->G	A	G	3	100	A	A
A00	C->T	C	T	2	100	C	A
A00	A->T	A	T	5	100	A	A
A00	G->T	G	T	3	100	G	A
A00	C->T	C	T	2	100	C	A
A00	A->G	A	G	2	100	A	A
A00	C->T	C	T	2	100	C	A
A00	T->C	T	C	3	100	T	A
A00	C->T	C	T	2	100	C	A
A00	G->A	G	A	3	100	G	A
A00	G->A	G	A	3	100	G	A
A00	T->C	T	C	2	100	T	A
A00	G->T	G	T	3	100	G	A
A00	T->C	T	C	2	100	T	A
A00	T->C	T	C	2	100	T	A
A00	A->G	A	G	2	100	A	A
A00	G->A	G	A	2	100	G	A
A00	C->T	C	T	5	100	C	A
A00	A->C	A	C	3	100	A	A
A00	C->T	C	T	3	100	C	A
A00	G->A	G	A	2	100	G	A
A00	G->T	G	T	3	100	G	A
A00	A->T	A	T	2	100	A	A
A00	C->A	C	A	2	100	C	A
A00	C->T	C	T	2	100	C	A
A00	G->A	G	A	3	100	G	A
A00	C->T	C	T	2	100	C	A
A00	C->T	C	T	2	100	C	A
A00	G->A	G	A	2	100	G	A
A00	T->G	T	G	2	100	T	A
A00	G->A	G	A	2	100	G	A
A00	G->T	G	T	2	100	G	A
A00	C->T	C	T	2	100	C	A
A00	A->G	A	G	2	100	A	A
A00	A->G	A	G	2	100	A	A
A00	T->A	T	A	2	100	T	A
A00	G->A	G	A	2	100	G	A
A00	G->C	G	C	3	100	G	A
A00	T->A	T	A	2	100	T	A
A00	C->G	C	G	3	100	C	A
A00	T->C	T	C	2	100	T	A
A00	A->T	A	T	4	100	A	A
A00	T->A	T	A	2	100	T	A
A00	A->G	A	G	2	100	A	A
A00	T->C	T	C	4	100	T	A
A00	G->A	G	A	3	100	G	A
A00	A->G	A	G	2	100	A	A
A00	G->A	G	A	2	100	G	A
A00	G->A	G	A	3	100	G	A
A00	A->G	A	G	2	100	A	A
A00	C->T	C	T	2	100	C	A
A00	T->C	T	C	6	100	T	A
A00	A->G	A	G	3	100	A	A
A00	C->A	C	A	3	100	C	A
A00	A->G	A	G	2	100	A	A
A00	C->A	C	A	3	100	C	A
A00	G->A	G	A	4	100	G	A
A00	T->A	T	A	4	100	T	A
A00	T->G	T	G	2	100	T	A
A00	A->C	A	C	3	100	A	A
A00	A->C	A	C	4	100	A	A
A00	C->G	C	G	3	100	C	A
A00	C->T	C	T	3	100	C	A
A00	G->A	G	A	2	100	G	A
A00	A->G	A	G	2	100	A	A
A00	C->T	C	T	2	100	C	A
A00	A->G	A	G	2	100	A	A
A00	T->C	T	C	5	100	T	A
A00	T->G	T	G	2	100	T	A
A00	A->C	A	C	2	100	A	A
A00	C->T	C	T	2	100	C	A
A00	C->G	C	G	5	100	C	A
A00	T->A	T	A	6	100	T	A
A00	C->A	C	A	2	100	C	A
A00	C->G	C	G	2	100	C	A
A00	T->G	T	G	2	100	T	A
A00	T->C	T	C	3	100	T	A
A00	A->T	A	T	2	100	A	A
A00	G->A	G	A	2	100	G	A
A00	A->T	A	T	2	100	A	A
A00	G->T	G	T	2	100	G	A
A00	C->G	C	G	4	100	C	A
A00	T->C	T	C	2	100	T	A
A00	G->A	G	A	3	100	G	A
A00	G->A	G	A	3	100	G	A
A00	C->T	C	T	3	100	C	A
A00	A->T	A	T	3	100	A	A
A00	G->C	G	C	2	100	G	A
A00	A->G	A	G	2	100	A	A
A00	G->A	G	A	2	100	G	A
A00	G->A	G	A	2	100	G	A
A00	C->T	C	T	3	100	C	A
A00	G->T	G	T	2	100	G	A
A00	T->A	T	A	2	100	T	A
A00	C->T	C	T	3	100	C	A
A00	G->A	G	A	3	100	G	A
A00	T->G	T	G	2	100	T	A
A00	C->T	C	T	3	100	C	A
A00	A->G	A	G	3	100	A	A
A00	G->A	G	A	2	100	G	A
A00	A->G	A	G	2	100	A	A
A00	T->G	T	G	2	100	T	A
A00	T->C	T	C	2	100	T	A
A00	A->C	A	C	3	100	A	A
A00	C->T	C	T	2	100	C	A
A00	G->A	G	A	2	100	G	A
A00	C->A	C	A	4	100	C	A
A00	T->C	T	C	4	100	T	A
A00	C->T	C	T	4	100	C	A
A00	T->A	T	A	3	100	T	A
A00	A->G	A	G	4	100	A	A
A00	T->A	T	A	3	100	T	A
A00	C->G	C	G	2	100	C	A
A00	C->A	C	A	3	100	C	A
A00	T->G	T	G	2	100	T	A
A00	T->G	T	G	2	100	T	A
A00	C->T	C	T	2	100	C	A
A00	G->A	G	A	2	100	G	A
A00	G->C	G	C	3	100	G	A
A00	C->T	C	T	3	100	C	A
A00	G->A	G	A	4	100	G	A
A00	T->A	T	A	2	100	T	A
A00	G->A	G	A	2	100	G	A
A00	C->A	C	A	2	100	C	A
A00	C->G	C	G	2	100	C	A
A00	C->G	C	G	2	100	C	A
A00	A->G	A	G	2	100	A	A
A00	G->T	G	T	2	100	G	A
A00	G->A	G	A	2	100	G	A
A00	A->T	A	T	4	100	A	A
A00	C->A	C	A	6	100	C	A
A00	A->G	A	G	2	100	A	A
A00	G->T	G	T	3	100	G	A
A00	C->A	C	A	2	100	C	A
A00	A->G	A	G	3	100	A	A
A00	T->C	T	C	2	100	T	A
A00	C->G	C	G	2	100	C	A
A00	G->C	G	C	3	100	G	A
A00	G->A	G	A	4	100	G	A
A00	A->G	A	G	2	100	A	A
A00	G->C	G	C	3	100	G	A
A00	T->C	T	C	2	100	T	A
A00	T->C	T	C	3	100	T	A
A00	C->G	C	G	2	100	C	A
A00	T->C	T	C	2	100	T	A
A00	G->C	G	C	2	100	G	A
A00	C->A	C	A	4	100	C	A
A00	G->C	G	C	4	100	G	A
A00	C->T	C	T	2	100	C	A
A00	T->C	T	C	2	100	T	A
A00	C->T	C	T	2	100	C	A
A00	G->T	G	T	2	100	G	A
A00	A->G	A	G	2	100	A	A
A00	G->A	G	A	2	100	G	A
A00	A->G	A	G	2	100	A	A
A00	T->G	T	G	2	100	T	A
A00	T->G	T	G	2	100	T	A
A00	A->G	A	G	2	100	A	A
A00	G->A	G	A	3	100	G	A
A00	C->G	C	G	2	100	C	A
A00	C->T	C	T	3	100	C	A
A00	C->T	C	T	4	100	C	A
A00	C->T	C	T	3	100	C	A
A00	T->C	T	C	2	100	T	A
A00	G->A	G	A	3	100	G	A
A00	A->G	A	G	3	100	A	A
A00	A->C	A	C	7	100	A	A
A00	C->A	C	A	2	100	C	A
A00	C->T	C	T	3	100	C	A
A00	G->A	G	A	2	100	G	A
A00	G->A	G	A	5	100	G	A
A00	A->T	A	T	2	100	A	A
A00	G->A	G	A	3	100	G	A
A00	A->G	A	G	3	100	A	A
A00	G->T	G	T	3	100	G	A
A00	G->T	G	T	2	100	G	A
A00	G->A	G	A	3	100	G	A
A00	C->A	C	A	2	100	C	A
A00	A->C	A	C	4	100	A	A
A00	T->C	T	C	2	100	T	A
A00	C->T	C	T	3	100	C	A
A00	T->A	T	A	4	100	T	A
A00	C->A	C	A	3	100	C	A
A00	C->G	C	G	2	100	C	A
A00	T->A	T	A	3	100	T	A
A00	T->C	T	C	2	100	T	A
A00	A->G	A	G	2	100	A	A
A00	T->C	T	C	2	100	T	A
A00	T->A	T	A	2	100	T	A
A00	C->T	C	T	4	100	C	A
A00	G->T	G	T	2	100	G	A
A00	T->C	T	C	2	100	T	A
A00	T->C	T	C	3	100	T	A
A00	C->T	C	T	2	100	C	A
A00	G->T	G	T	4	100	G	A
A00	C->T	C	T	3	100	C	A
A00	A->G	A	G	3	100	A	A
A00	G->T	G	T	2	100	G	A
A00	C->T	C	T	3	100	C	A
A00	T->C	T	C	2	100	T	A
A00	T->A	T	A	2	100	T	A
A00	C->A	C	A	2	100	C	A
A00	G->T	G	T	4	100	G	A
A00	A->T	A	T	4	100	A	A
A00	A->G	A	G	5	100	A	A
A00	G->T	G	T	2	100	G	A
A00	A->G	A	G	2	100	A	A
A00	T->C	T	C	3	100	T	A
A00	A->G	A	G	2	100	A	A
A00	G->A	G	A	2	100	G	A
A00	A->G	A	G	3	100	A	A
A00	T->C	T	C	2	100	T	A
A00	G->A	G	A	2	100	G	A
A00	C->T	C	T	3	100	C	A
A00	A->C	A	C	2	100	A	A
A00	C->A	C	A	2	100	C	A
A00	G->A	G	A	3	100	G	A
A00	C->T	C	T	3	100	C	A
A00	A->C	A	C	2	100	A	A
A00	C->A	C	A	2	100	C	A
A00	C->A	C	A	2	100	C	A
A00	G->A	G	A	3	100	G	A
A00	C->G	C	G	2	100	C	A
A00	G->A	G	A	2	100	G	A
A00	T->C	T	C	3	100	T	A
A00	G->T	G	T	2	100	G	A
A00	A->G	A	G	2	100	A	A
A00	C->A	C	A	2	100	C	A
A00	A->T	A	T	2	100	A	A
A00	T->C	T	C	2	100	T	A
A00	C->T	C	T	3	100	C	A
A00	T->C	T	C	4	100	T	A
A00	G->T	G	T	3	100	G	A
A00	G->A	G	A	2	100	G	A
A00	C->T	C	T	2	100	C	A
A00	A->C	A	C	4	100	A	A
A00	A->G	A	G	2	100	A	A
A00	A->C	A	C	2	100	A	A
A00	A->G	A	G	2	100	A	A
A00	G->A	G	A	2	100	G	A
A00	G->A	G	A	2	100	G	A
A00	C->T	C	T	3	100	C	A
A00	G->A	G	A	2	100	G	A
A00	T->C	T	C	2	100	T	A
A00	T->C	T	C	2	100	T	A
A00	C->G	C	G	3	100	C	A
A00	C->G	C	G	2	100	C	A
A00	T->G	T	G	2	100	T	A
A00	A->C	A	C	2	100	A	A
A00	C->A	C	A	4	100	C	A
A00	G->A	G	A	2	100	G	A
A00	C->T	C	T	3	100	C	A
A00	C->T	C	T	2	100	C	A
A00	A->T	A	T	4	100	A	A
A00	A->C	A	C	2	100	A	A
A00	G->T	G	T	2	100	G	A
A00	C->T	C	T	3	100	C	A
A00	A->C	A	C	2	100	A	A
A00	A->G	A	G	4	100	A	A
A00	T->C	T	C	3	100	T	A
A00	T->C	T	C	7	100	T	A
A00	A->T	A	T	2	100	A	A
A00	G->C	G	C	2	100	G	A
A00	C->T	C	T	2	100	C	A
A00	C->A	C	A	3	100	C	A
A00	C->T	C	T	2	100	C	A
A00	A->G	A	G	6	100	A	A
A00	T->C	T	C	2	100	T	A
A00	G->A	G	A	2	100	G	A
A00	T->C	T	C	2	100	T	A
A00	T->A	T	A	3	100	T	A
A00	G->T	G	T	6	100	G	A
A00	G->A	G	A	2	100	G	A
A00	A->T	A	T	2	100	A	A
A00	C->T	C	T	2	100	C	A
A00	A->G	A	G	3	100	A	A
A00	C->T	C	T	2	100	C	A
A00	C->T	C	T	2	100	C	A
A00	A->G	A	G	2	100	A	A
A00	T->C	T	C	4	100	T	A
A00	G->C	G	C	3	100	G	A
A00	G->A	G	A	3	100	G	A
A00	G->A	G	A	2	100	G	A
A00	A->G	A	G	2	100	A	A
A00	T->C	T	C	2	100	T	A
A00	T->G	T	G	2	100	T	A
A00	T->C	T	C	3	100	T	A
A00	C->A	C	A	2	100	C	A
A00	G->A	G	A	2	100	G	A
A00	A->C	A	C	2	100	A	A
A00	C->T	C	T	5	100	C	A
A00	G->A	G	A	3	100	G	A
A00	G->A	G	A	2	100	G	A
A00	G->A	G	A	2	100	G	A
A00	C->T	C	T	2	100	C	A
A00	C->A	C	A	2	100	C	A
A00	A->G	A	G	5	100	A	A
A00	A->C	A	C	3	100	A	A
A00	G->C	G	C	2	100	G	A
A00	T->C	T	C	2	100	T	A
A00	T->A	T	A	3	100	T	A
A00	C->A	C	A	3	100	C	A
A00	G->A	G	A	2	100	G	A
A00	G->T	G	T	2	100	G	A
A00	C->G	C	G	4	100	C	A
A00	G->C	G	C	5	100	G	A
A00	A->T	A	T	3	100	A	A
A00	A->C	A	C	3	100	A	A
A00	A->G	A	G	3	100	A	A
A00	A->G	A	G	6	100	A	A
A00	T->C	T	C	2	100	T	A
A00	G->A	G	A	2	100	G	A
A00	C->G	C	G	2	100	C	A
A00	A->G	A	G	2	100	A	A
A00	A->T	A	T	2	100	A	A
A00	T->C	T	C	2	100	T	A
A00	G->A	G	A	3	100	G	A
A00	C->T	C	T	2	100	C	A
A00	A->G	A	G	2	100	A	A
A00	C->G	C	G	5	100	C	A
A00	A->G	A	G	4	100	A	A
A00	C->T	C	T	2	100	C	A
A00	C->T	C	T	2	100	C	A
A00	G->A	G	A	2	100	G	A
A00	C->G	C	G	2	100	C	A
A00	C->A	C	A	2	100	C	A
A00	G->A	G	A	3	100	G	A
A00	C->T	C	T	2	100	C	A
A00	G->A	G	A	2	100	G	A
A00	C->T	C	T	2	100	C	A
A00	G->A	G	A	4	100	G	A
A00	C->T	C	T	3	100	C	A
A00	G->T	G	T	3	100	G	A
A00	G->A	G	A	4	100	G	A
A00	C->T	C	T	3	100	C	A
A00	G->A	G	A	2	100	G	A
A00	T->A	T	A	4	100	T	A
A00	C->G	C	G	2	100	C	A
A00	A->T	A	T	3	100	A	A
A00	G->C	G	C	2	100	G	A
A00	C->T	C	T	4	100	C	A
A00	T->C	T	C	2	100	T	A
A00	A->G	A	G	3	100	A	A
A00	A->G	A	G	2	100	A	A
A00	G->C	G	C	2	100	G	A
A00	A->C	A	C	2	100	A	A
A00	C->G	C	G	3	100	C	A
A00	T->C	T	C	2	100	T	A
A00	T->C	T	C	3	100	T	A
A00	A->G	A	G	2	100	A	A
A00	C->G	C	G	3	100	C	A
A00	T->A	T	A	3	100	T	A
A00	G->C	G	C	2	100	G	A
A00	A->G	A	G	2	100	A	A
A00	G->A	G	A	3	100	G	A
A00	G->A	G	A	4	100	G	A
A00	C->G	C	G	4	100	C	A
A00	C->T	C	T	3	100	C	A
A00	G->T	G	T	2	100	G	A
A00	C->A	C	A	2	100	C	A
A00	C->G	C	G	3	100	C	A
A00	C->A	C	A	3	100	C	A
A00	G->T	G	T	2	100	G	A
A00	T->C	T	C	2	100	T	A
A00	G->T	G	T	2	100	G	A
A00	T->C	T	C	2	100	T	A
A00	A->G	A	G	2	100	A	A
A00	T->C	T	C	2	100	T	A
A00	A->G	A	G	2	100	A	A
A00	A->T	A	T	2	100	A	A
A00	A->G	A	G	3	100	A	A
A00	T->C	T	C	2	100	T	A
A00	T->C	T	C	3	100	T	A
A00	T->A	T	A	2	100	T	A
A00	T->C	T	C	3	100	T	A
A00	G->A	G	A	2	100	G	A
A00	G->C	G	C	3	100	G	A
A00	T->C	T	C	3	100	T	A
A00	G->T	G	T	3	100	G	A
A00	C->A	C	A	2	100	C	A
A00	T->C	T	C	2	100	T	A
A00	T->A	T	A	2	100	T	A
A00	T->C	T	C	3	100	T	A
A00	G->T	G	T	2	100	G	A
A00	A->T	A	T	2	100	A	A
A00	T->C	T	C	2	100	T	A
A00	C->A	C	A	2	100	C	A
A00	C->T	C	T	2	100	C	A
A00	G->A	G	A	5	100	G	A
A00	C->T	C	T	2	100	C	A
A00	C->G	C	G	2	100	C	A
A00	G->C	G	C	2	100	G	A
A00	C->G	C	G	2	100	C	A
A00	G->T	G	T	2	100	G	A
A00	G->T	G	T	2	100	G	A
A00	T->C	T	C	4	100	T	A
A00	T->C	T	C	5	100	T	A
A00	A->G	A	G	2	100	A	A
A00	A->G	A	G	2	100	A	A
A00	C->A	C	A	2	100	C	A
A00	T->C	T	C	2	100	T	A
A00	T->C	T	C	2	100	T	A
A00	C->T	C	T	2	100	C	A
A00	C->T	C	T	3	100	C	A
A00	A->G	A	G	3	100	A	A
A00	A->T	A	T	2	100	A	A
A00	G->C	G	C	2	100	G	A
A00	G->C	G	C	4	100	G	A
A00	T->C	T	C	2	100	T	A
A00	C->T	C	T	4	100	C	A
A00	G->A	G	A	2	100	G	A
A00	T->C	T	C	2	100	T	A
A00	G->A	G	A	2	100	G	A
A00	A->G	A	G	2	100	A	A
A00	G->A	G	A	2	100	G	A
A00	G->A	G	A	3	100	G	A
A00	T->A	T	A	4	100	T	A
A00	C->G	C	G	4	100	C	A
A00	T->A	T	A	2	100	T	A
A00	T->C	T	C	3	100	T	A
A00	G->T	G	T	2	100	G	A
A00	G->A	G	A	2	100	G	A
A00	C->G	C	G	3	100	C	A
A00	G->C	G	C	3	100	G	A
A00	C->T	C	T	3	100	C	A
A00	T->C	T	C	2	100	T	A
A00	C->A	C	A	3	100	C	A
A00	A->G	A	G	5	100	A	A
A00	A->T	A	T	6	100	A	A
A00	G->T	G	T	2	100	G	A
A00	G->A	G	A	2	100	G	A
A00	C->T	C	T	2	100	C	A
A00	T->C	T	C	2	100	T	A
A00	G->T	G	T	4	100	G	A
A00	T->C	T	C	2	100	T	A
A00	G->A	G	A	5	100	G	A
A00	G->A	G	A	4	100	G	A
A00	G->T	G	T	3	100	G	A
A00	A->G	A	G	2	100	A	A
A00	C->G	C	G	2	100	C	A
A00	A->C	A	C	2	100	A	A
A00	C->A	C	A	6	100	C	A
A00	A->T	A	T	2	100	A	A
A00	A->T	A	T	4	100	A	A
A00	G->A	G	A	4	100	G	A
A00	T->C	T	C	4	100	T	A
A00	C->T	C	T	2	100	C	A
A00	T->A	T	A	3	100	T	A
A00	A->G	A	G	3	100	A	A
A00	C->A	C	A	5	100	C	A
A00	C->T	C	T	7	100	C	A
A00	C->A	C	A	2	100	C	A
A00	A->C	A	C	2	100	A	A
A00	G->A	G	A	3	100	G	A
A00	C->G	C	G	2	100	C	A
A00	T->C	T	C	2	100	T	A
A00	A->G	A	G	4	100	A	A
A00	G->A	G	A	3	100	G	A
A00	C->A	C	A	2	100	C	A
A00	C->A	C	A	2	100	C	A
A00	C->T	C	T	3	100	C	A
A00	T->A	T	A	4	100	T	A
A00	A->G	A	G	4	100	A	A
A00	A->G	A	G	3	100	A	A
A00	A->T	A	T	3	100	A	A
A00	C->T	C	T	2	100	C	A
A00	G->A	G	A	4	100	G	A
A00	G->A	G	A	2	100	G	A
A00	G->T	G	T	2	100	G	A
A00	C->T	C	T	3	100	C	A
A00	G->C	G	C	2	100	G	A
A00	G->A	G	A	2	100	G	A
A00	C->T	C	T	2	100	C	A
A00	G->A	G	A	2	100	G	A
A00	T->G	T	G	3	100	T	A
A00	C->T	C	T	2	100	C	A
A00	G->A	G	A	3	100	G	A
A00	G->T	G	T	2	100	G	A
A00	G->C	G	C	3	100	G	A
A00	T->C	T	C	3	100	T	A
A00	T->A	T	A	3	100	T	A
A00	T->C	T	C	2	100	T	A
A00	G->T	G	T	2	100	G	A
A00	A->C	A	C	3	100	A	A
A00	G->C	G	C	4	100	G	A
A00	A->G	A	G	6	100	A	A
A00	G->A	G	A	4	100	G	A
A00	A->G	A	G	2	100	A	A
A00	G->A	G	A	5	100	G	A
A00	G->C	G	C	2	100	G	A
A00	C->T	C	T	2	100	C	A
A00	C->G	C	G	2	100	C	A
A00	C->T	C	T	2	100	C	A
A00	T->C	T	C	3	100	T	A
A00	T->C	T	C	2	100	T	A
A00	T->G	T	G	2	100	T	A
A00	T->C	T	C	2	100	T	A
A00	C->A	C	A	3	100	C	A
A00	C->T	C	T	2	100	C	A
A00	G->C	G	C	2	100	G	A
A00	T->C	T	C	5	100	T	A
A00	G->A	G	A	4	100	G	A
A00	C->G	C	G	3	100	C	A
A00	C->T	C	T	3	100	C	A
A00	T->A	T	A	4	100	T	A
A00	T->A	T	A	2	100	T	A
A00	G->T	G	T	2	100	G	A
A00	T->A	T	A	2	100	T	A
A00	C->A	C	A	3	100	C	A
A00-T	A->C	A	C	3	100	C	D
A00-T	T->C	T	C	2	100	C	D
A00-T	C->G	C	G	2	100	G	D
A00-T	T->C	T	C	2	100	C	D
A00-T	A->G	A	G	2	100	G	D
A00-T	G->A	G	A	2	100	A	D
A00-T	T->C	T	C	2	100	C	D
A00-T	G->A	G	A	3	100	A	D
A00-T	T->G	T	G	2	100	G	D
A00-T	A->C	A	C	2	100	C	D
A00-T	G->T	G	T	2	100	T	D
A00-T	C->T	C	T	2	100	T	D
A00-T	C->T	C	T	2	100	T	D
A00-T	G->A	G	A	4	100	A	D
A00-T	C->T	C	T	2	100	T	D
A00-T	C->T	C	T	5	100	T	D
A00-T	T->C	T	C	3	100	C	D
A00-T	T->C	T	C	3	100	C	D
A00-T	G->C	G	C	3	100	C	D
A00-T	G->T	G	T	4	100	T	D
A00-T	A->T	A	T	3	100	T	D
A00-T	C->T	C	T	2	100	T	D
A00-T	T->C	T	C	2	100	C	D
A00-T	C->A	C	A	2	100	A	D
A00-T	C->A	C	A	2	100	A	D
A00-T	C->A	C	A	2	100	A	D
A00-T	A->G	A	G	2	100	G	D
A00-T	T->G	T	G	4	100	G	D
A00-T	G->A	G	A	3	100	A	D
A00-T	C->T	C	T	3	100	T	D
A00-T	G->C	G	C	4	100	C	D
A00-T	T->C	T	C	2	100	C	D
A00-T~	C->T	C	T	2	100	T	D
A00-T~	G->A	G	A	5	100	A	D
A000-T	T->G	T	G	3	100	G	D
A0000	G->T	G	T	3	100	G	A
A0000	C->T	C	T	3	100	C	A
A0000	C->A	C	A	3	100	C	A
A0000	C->T	C	T	2	100	C	A
A0000	G->A	G	A	3	100	G	A
A0000	C->T	C	T	3	100	C	A
A0000	G->A	G	A	2	100	G	A
A0000	G->A	G	A	3	100	G	A
A0000	C->G	C	G	3	100	C	A
A0000	G->A	G	A	4	100	G	A
A0000	G->A	G	A	3	100	G	A
A0000	G->A	G	A	3	100	G	A
A0000	C->A	C	A	2	100	C	A
A0000	C->T	C	T	2	100	C	A
A0000	T->C	T	C	3	100	T	A
A0000	A->G	A	G	4	100	A	A
A0000	G->T	G	T	2	100	G	A
A0000	T->C	T	C	2	100	T	A
A0000	G->T	G	T	3	100	G	A
A0000	T->G	T	G	4	100	T	A
A0000	G->A	G	A	3	100	G	A
A0000	C->T	C	T	4	100	C	A
A0000	C->G	C	G	2	100	C	A
A0000	C->T	C	T	3	100	C	A
A0000	G->T	G	T	3	100	G	A
A0000	G->T	G	T	2	100	G	A
A0000	C->T	C	T	4	100	C	A
A0000	C->G	C	G	4	100	C	A
A0000	G->T	G	T	3	100	G	A
A0000	G->T	G	T	3	100	G	A
A0000	G->C	G	C	2	100	G	A
A0000	C->A	C	A	2	100	C	A
A0000	C->T	C	T	3	100	C	A
A0000	C->G	C	G	3	100	C	A
A000b1	T->C	T	C	3	100	T	A
A000b1	A->G	A	G	5	100	A	A
A000b1	A->G	A	G	2	100	A	A
A000b1	C->T	C	T	3	100	C	A
A00a	G->A	G	A	2	100	G	A
A00c	C->G	C	G	5	100	C	A
A0a1	A->T	A	T	2	100	A	A
A0a1	C->T	C	T	2	100	C	A
A0a1	C->T	C	T	2	100	C	A
A0a1	C->T	C	T	2	100	C	A
A0a1	C->A	C	A	2	100	C	A
A0a1a	G->A	G	A	2	100	G	A
A0a1a	A->G	G	A	2	100	G	A
A0a1b	G->C	G	C	4	100	G	A
A0a2	A->G	A	G	2	100	A	A
A0b	G->A	G	A	3	100	G	A
A0b	A->C	A	C	3	100	A	A
A0b	G->A	G	A	2	100	G	A
A0b	T->G	T	G	3	100	T	A
A0b	T->G	T	G	2	100	T	A
A0b	A->G	A	G	2	100	A	A
A0b	T->C	T	C	2	100	T	A
A0b	T->C	T	C	3	100	T	A
A1	G->A	G	A	2	100	A	D
A1	G->A	G	A	2	100	A	D
A1a	G->A	G	A	2	100	G	A
A1a	A->C	A	C	4	100	A	A
A1a	T->G	T	G	2	100	T	A
A1a	C->A	C	A	2	100	C	A
A1a~	A->G	A	G	2	100	A	A
A1b	C->A	C	A	3	100	A	D
A1b	C->T	T	C	2	100	C	D
A1b	A->C	C	A	2	100	A	D
A1b	T->C	T	C	3	100	C	D
A1b	C->T	T	C	3	100	C	D
A1b	G->A	A	G	3	100	G	D
A1b	G->A	A	G	2	100	G	D
A1b	T->C	C	T	2	100	T	D
A1b	T->C	C	T	3	100	T	D
A1b	G->A	A	G	2	100	G	D
A1b	T->C	C	T	4	100	T	D
A1b	A->G	G	A	4	100	A	D
A1b	T->C	C	T	3	100	T	D
A1b	A->C	C	A	3	100	A	D
A1b	C->A	C	A	2	100	A	D
A1b1	G->A	G	A	2	100	G	A
A1b1a	A->T	A	T	2	100	A	A
A1b1a	A->G	A	G	2	100	A	A
A1b1a1	C->T	C	T	2	100	C	A
A1b1a1	G->A	G	A	3	100	G	A
A1b1a1	T->A	T	A	2	100	T	A
A1b1a1	G->T	G	T	2	100	G	A
A1b1a1	C->A	C	A	5	100	C	A
A1b1a1	C->T	C	T	4	100	C	A
A1b1a1a2a1a	G->C	G	C	4	100	G	A
A1b1a1a2a1a~	A->C	A	C	2	100	A	A
A1b1a1a2a1a~	A->T	A	T	2	100	A	A
A1b1a1a2a1a~	G->C	G	C	2	100	G	A
A1b1a1a2b~	C->A	C	A	3	100	C	A
A1b1a1a2b~	G->T	G	T	3	100	G	A
A1b1a1a2b~	A->G	A	G	2	100	A	A
A1b1a1a2b~	G->A	G	A	2	100	G	A
A1b1a1a2b~	T->G	T	G	2	100	T	A
A1b1a1a2b~	G->A	G	A	2	100	G	A
A1b1a1a2b~	C->T	C	T	2	100	C	A
A1b1a1a2b~	C->G	C	G	2	100	C	A
A1b1a2~	T->C	T	C	3	100	T	A
A1b1a2~	A->G	A	G	4	100	A	A
A1b1a2~	C->A	C	A	3	100	C	A
A1b1b2	G->C	G	C	3	100	G	A
A1b1b2	C->G	C	G	2	100	C	A
A1b1b2	A->G	A	G	2	100	A	A
A1b1b2b2~	G->T	G	T	3	100	G	A
A1b1b2b2~	C->T	C	T	3	100	C	A
A1b1b2b2~	C->T	C	T	2	100	C	A
A1b1b2b2~	A->T	A	T	6	100	A	A
A1b1b2b~	G->A	G	A	3	100	G	A
A1b1b2b~	T->C	T	C	3	100	T	A
A1b1b2b~	C->T	C	T	3	100	C	A
A1b1b2b~	T->C	T	C	5	100	T	A
A1b1b2b~	G->A	G	A	4	100	G	A
A1b1b2b~	A->G	A	G	4	100	A	A
A1b1b2b~	A->T	A	T	3	100	A	A
A1b1b2b~	G->C	G	C	3	100	G	A
B1	G->T	G	T	2	100	G	A
B2	C->T	C	T	2	100	C	A
B2a1a1	C->T	C	T	2	100	C	A
B2a1a1a1a1~	A->G	A	G	2	100	A	A
B2a1a1a1a1~	A->G	A	G	2	100	A	A
B2a1a1a1a1~	T->C	T	C	2	100	T	A
B2a1a1a1a1~	A->T	A	T	2	100	A	A
B2a1a1a1a2	G->A	G	A	2	100	G	A
B2a1a1a1a2	A->G	A	G	3	100	A	A
B2a1a1a1a2	T->C	T	C	3	100	T	A
B2a1a1a1a2	C->T	C	T	2	100	C	A
B2a1a1a1a2	T->G	T	G	2	100	T	A
B2a1a1a1a2	G->A	G	A	2	100	G	A
B2a1a1a1a2	C->T	C	T	4	100	C	A
B2a1a1a1a2	C->A	C	A	2	100	C	A
B2a1a1a1a2	A->G	A	G	2	100	A	A
B2a1a1a1a2	C->T	C	T	2	100	C	A
B2a1a1a1a2	C->T	C	T	2	100	C	A
B2a1a1a1a2	C->T	C	T	3	100	C	A
B2a1a1a1a2a~	C->T	C	T	2	100	C	A
B2a1a1a1a2a~	C->A	C	A	2	100	C	A
B2a1a1a1a3~	G->A	G	A	4	100	G	A
B2a1a1a1a3~	T->C	T	C	2	100	T	A
B2a1a1a1a~	T->C	T	C	2	100	T	A
B2a1a1a1a~	A->C	A	C	7	100	A	A
B2a1a1a1a~	G->A	G	A	3	100	G	A
B2a1a1a1a~	G->A	G	A	3	100	G	A
B2a1a1a1b~	G->C	G	C	2	100	G	A
B2a1a1a1b~	T->G	T	G	4	100	T	A
B2a1a1a1b~	A->G	A	G	3	100	A	A
B2a1a1a1b~	C->T	C	T	2	100	C	A
B2a1a1a1b~	G->A	G	A	3	100	G	A
B2a1a1a1b~	G->A	G	A	2	100	G	A
B2a1a1a1b~	T->C	T	C	4	100	T	A
B2a1a1a1b~	G->A	G	A	2	100	G	A
B2a1a1a1b~	C->A	C	A	2	100	C	A
B2a1a1a1b~	A->G	A	G	4	100	A	A
B2a1a1a1b~	G->A	G	A	2	100	G	A
B2a1a1a1b~	A->G	A	G	2	100	A	A
B2a1a1a1b~	C->T	C	T	2	100	C	A
2	B2a1a1a1b~	G->A	G	A	3	100	G
B2a1a1a1b~	C->T	C	T	5	100	C	A
B2a1a1a1b~	C->T	C	T	2	100	C	A
B2a1a1a1b~	G->A	G	A	2	100	G	A
B2a1a1a1b~	A->C	A	C	2	100	A	A
B2a1a1a1b~	A->G	A	G	3	100	A	A
B2a1a1a1b~	A->C	A	C	2	100	A	A
B2a1a1a1b~	T->G	T	G	5	100	T	A
B2a1a1a1b~	A->G	A	G	2	100	A	A
B2a1a1a1b~	A->T	A	T	4	100	A	A
B2a1a1a1b~	A->G	A	G	3	100	A	A
B2a1a1a1b~	G->C	G	C	3	100	G	A
B2a1a1a1b~	A->G	A	G	2	100	A	A
B2a1a1a1b~	G->A	G	A	2	100	G	A
B2a1a1a1b~	G->A	G	A	2	100	G	A
B2a1a1a1b~	G->A	G	A	2	100	G	A
B2a1a1a1b~	C->T	C	T	2	100	C	A
B2a1a1a1b~	G->C	G	C	2	100	G	A
B2a1a1a1~	G->A	G	A	2	100	G	A
B2a1a1a1~	T->C	T	C	2	100	T	A
B2a1a1a1~	T->C	T	C	2	100	T	A
B2a1a1a1~	T->C	T	C	3	100	T	A
B2a1a1a1~	A->T	A	T	5	100	A	A
B2a1a1a1~	A->C	A	C	2	100	A	A
B2a1a1a1~	A->G	A	G	2	100	A	A
B2a1a1a1~	G->T	G	T	2	100	G	A
B2a1a1a1~	A->G	A	G	4	100	A	A
B2a1a1a1~	G->A	G	A	2	100	G	A
B2a1a1a1~	A->C	A	C	3	100	A	A
B2a1a1a1~	G->A	G	A	2	100	G	A
B2a1a1a1~	T->C	T	C	3	100	T	A
B2a1a1a1~	T->G	T	G	2	100	T	A
B2a1a1a1~	G->A	G	A	3	100	G	A
B2a1a1a1~	G->A	G	A	3	100	G	A
B2a1a1a1~	C->G	C	G	5	100	C	A
B2a1a1a1~	G->A	G	A	2	100	G	A
B2a1a1a1~	G->A	G	A	2	100	G	A
B2a1a1a1~	A->G	A	G	3	100	A	A
B2a1a1a1~	G->A	G	A	3	100	G	A
B2a1a1a1~	G->A	G	A	3	100	G	A
B2a1a1a1~	G->T	G	T	2	100	G	A
B2a1a1a1~	G->C	G	C	2	100	G	A
B2a1a1a1~	G->A	G	A	2	100	G	A
B2a1a1a1~	A->G	A	G	3	100	A	A
B2a1a1a1~	T->G	T	G	2	100	T	A
B2a1a1a1~	C->G	C	G	2	100	C	A
B2a1a1a1~	G->T	G	T	3	100	G	A
B2a1a1a1~	C->G	C	G	3	100	C	A
B2a1a1a1~	A->G	A	G	4	100	A	A
B2a1a1a1~	G->T	G	T	3	100	G	A
B2a1a1a1~	A->G	A	G	2	100	A	A
B2a1a1a1~	C->G	C	G	2	100	C	A
B2a1a1a1~	A->G	A	G	2	100	A	A
B2a1a1a1~	G->A	G	A	2	100	G	A
B2a1a1a1~	C->A	C	A	2	100	C	A
B2a1a1a1~	T->A	T	A	2	100	T	A
B2a1a1a1~	T->C	T	C	2	100	T	A
B2a1a1a1~	C->G	C	G	2	100	C	A
B2a1a1a1~	A->T	A	T	3	100	A	A
B2a1a1a1~	C->T	C	T	5	100	C	A
B2a1a1a1~	A->G	A	G	2	100	A	A
B2a1a1a1~	C->A	C	A	2	100	C	A
B2a1a1a1~	C->A	C	A	4	100	C	A
B2a1a1a1~	T->C	T	C	2	100	T	A
B2a1a1a1~	C->T	C	T	3	100	C	A
B2a1a1a1~	T->C	T	C	2	100	T	A
B2a1a1a1~	A->G	A	G	4	100	A	A
B2a1a1a1~	C->G	C	G	2	100	C	A
B2a1a1a1~	G->A	G	A	3	100	G	A
B2a1a1a1~	T->C	T	C	2	100	T	A
B2a1a1a1~	T->G	T	G	2	100	T	A
B2a1a1a1~	G->A	G	A	3	100	G	A
B2a1a1a1~	G->C	G	C	2	100	G	A
B2a1a1a1~	C->T	C	T	2	100	C	A
B2a1a1a1~	G->C	G	C	2	100	G	A
B2a1a1a1~	A->C	A	C	3	100	A	A
B2a1a1a1~	C->T	C	T	2	100	C	A
B2a1a1a1~	G->C	G	C	3	100	G	A
B2a1a1a1~	C->A	C	A	2	100	C	A
B2a1a1a1~	G->A	G	A	2	100	G	A
B2a1a1a1~	A->G	A	G	2	100	A	A
B2a1a1a1~	G->A	G	A	2	100	G	A
B2a1a1a1~	C->T	C	T	2	100	C	A
B2a1a1a1~	A->G	A	G	3	100	A	A
B2a1a1a1~	C->T	C	T	2	100	C	A
B2a1a1a1~	G->A	G	A	2	100	G	A
B2a1a1a1~	T->C	T	C	4	100	T	A
B2a1a1a1~	C->G	C	G	2	100	C	A
B2a1a1a1~	T->C	T	C	4	100	T	A
B2a1a1a1~	G->A	G	A	2	100	G	A
B2a1a1a1~	G->A	G	A	4	100	G	A
B2a1a1a1~	C->T	C	T	2	100	C	A
B2a1a1a1~	A->T	A	T	3	100	A	A
B2a1a1a1~	T->G	T	G	2	100	T	A
B2a1a1a1~	G->T	G	T	3	100	G	A
B2a1a1a1~	T->A	T	A	4	100	T	A
B2a1a1a1~	C->G	C	G	3	100	C	A
B2a1a1a1~	T->C	T	C	2	100	T	A
B2a1a1a1~	A->G	A	G	4	100	A	A
B2a1a1a1~	T->C	T	C	5	100	T	A
B2a1a1a1~	T->C	T	C	2	100	T	A
B2a1a1a1~	G->T	G	T	2	100	G	A
B2a1a1a1~	G->T	G	T	3	100	G	A
B2a1a1a1~	G->A	G	A	3	100	G	A
B2a1a1a1~	T->C	T	C	3	100	T	A
B2a1a1a1~	C->T	C	T	4	100	C	A
B2a1a1a1~	T->A	T	A	2	100	T	A
B2a1a1a1~	A->C	A	C	3	100	A	A
B2a1a1a1~	A->T	A	T	2	100	A	A
B2a1a1a1~	T->G	T	G	3	100	T	A
B2a1a1a1~	A->G	A	G	2	100	A	A
B2a1a1a1~	C->T	C	T	3	100	C	A
B2a1a1a~	G->A	G	A	3	100	G	A
B2b1	C->G	C	G	5	100	C	A
B2b1a1a~	T->C	T	C	2	100	T	A
B2b1a1a~	G->A	G	A	2	100	G	A
B2b1a1b	G->A	G	A	3	100	G	A
B2b1a1b~	C->T	C	T	2	100	C	A
B2b1a1c1	C->T	C	T	2	100	C	A
B2b1a1c2a1~	T->A	T	A	2	100	T	A
B2b1a1c2a2~	A->G	A	G	3	100	A	A
B2b1a1c2a~	G->T	G	T	2	100	G	A
B2b1a1c2a~	A->G	A	G	2	100	A	A
B2b1a1c2a~	C->T	C	T	3	100	C	A
B2b1a1c2a~	T->C	T	C	2	100	T	A
B2b1a1c2a~	G->A	G	A	2	100	G	A
B2b1a1c2a~	G->A	G	A	2	100	G	A
B2b1a1c2a~	G->A	G	A	4	100	G	A
B2b1a1c2a~	A->C	A	C	3	100	A	A
B2b1a1c2a~	A->G	A	G	3	100	A	A
B2b1a1c2a~	A->C	A	C	3	100	A	A
B2b1a1c2a~	A->G	A	G	3	100	A	A
B2b1a1c2a~	A->T	A	T	2	100	A	A
B2b1a1c2a~	G->A	G	A	2	100	G	A
B2b1a1c2a~	T->G	T	G	2	100	T	A
B2b1a1c2a~	G->A	G	A	2	100	G	A
B2b1a1c2a~	G->A	G	A	3	100	G	A
B2b1a1c2a~	G->T	G	T	2	100	G	A
B2b1a1c2a~	A->G	A	G	3	100	A	A
B2b1a1c2a~	T->C	T	C	2	100	T	A
B2b1a1c2a~	T->C	T	C	2	100	T	A
B2b1a1c2a~	T->C	T	C	2	100	T	A
B2b1a1c2a~	C->T	C	T	3	100	C	A
B2b1a1c2a~	C->A	C	A	4	100	C	A
B2b1a1c2a~	T->G	T	G	4	100	T	A
B2b1a1c2a~	C->A	C	A	2	100	C	A
B2b1a1c2a~	C->G	C	G	2	100	C	A
B2b1a1c2a~	A->G	A	G	2	100	A	A
B2b1a1c2a~	C->A	C	A	3	100	C	A
B2b1a1c2a~	T->C	T	C	2	100	T	A
B2b1a1c2~	T->G	T	G	3	100	T	A
B2b1a1c2~	G->A	G	A	4	100	G	A
B2b1a1c2~	C->T	C	T	2	100	C	A
B2b1a1c2~	C->T	C	T	4	100	C	A
B2b1a1c2~	T->G	T	G	3	100	T	A
B2b1a1c2~	C->A	C	A	2	100	C	A
B2b1a1c2~	A->G	A	G	4	100	A	A
B2b1a1c2~	G->A	G	A	2	100	G	A
B2b1a1c2~	G->A	G	A	3	100	G	A
B2b1a1c2~	A->G	A	G	2	100	A	A
B2b1a1c2~	G->A	G	A	2	100	G	A
B2b1a1c2~	G->A	G	A	3	100	G	A
B2b1a1c2~	A->G	A	G	2	100	A	A
B2b1a1c2~	C->T	C	T	2	100	C	A
B2b1a1c2~	A->G	A	G	3	100	A	A
B2b1a1c2~	G->A	G	A	4	100	G	A
B2b1a1c2~	A->G	A	G	4	100	A	A
B2b1a1c2~	T->C	T	C	3	100	T	A
B2b1a1c2~	T->C	T	C	2	100	T	A
B2b1a1c2~	G->T	G	T	2	100	G	A
B2b1a1c2~	G->T	G	T	4	100	G	A
B2b1a1c2~	A->T	A	T	2	100	A	A
B2b1a1c2~	G->T	G	T	6	100	G	A
B2b1a1c2~	G->A	G	A	4	100	G	A
B2b1a1c2~	A->G	A	G	2	100	A	A
B2b1a1c2~	T->C	T	C	3	100	T	A
B2b1a1c2~	T->C	T	C	2	100	T	A
B2b1a1c2~	A->G	A	G	3	100	A	A
B2b1a1c2~	C->T	C	T	2	100	C	A
B2b1a1c2~	C->T	C	T	3	100	C	A
B2b1a1c2~	T->A	T	A	2	100	T	A
B2b1a1c~	G->A	G	A	4	100	G	A
B2b1a1c~	C->T	C	T	2	100	C	A
B2b1a1c~	C->G	C	G	4	100	C	A
B2b1a1c~	T->C	T	C	2	100	T	A
B2b1a1c~	C->T	C	T	5	100	C	A
B2b1a1c~	G->T	G	T	2	100	G	A
B2b1a1~	C->T	C	T	2	100	C	A
B2b1a1~	A->G	A	G	3	100	A	A
B2b1a1~	C->T	C	T	4	100	C	A
B2b1a1~	G->A	G	A	2	100	G	A
B2b1a1~	A->G	A	G	2	100	A	A
B2b1a1~	T->C	T	C	2	100	T	A
B2b1a1~	T->G	T	G	3	100	T	A
B2b1a1~	C->A	C	A	2	100	C	A
B2b1a1~	T->C	T	C	2	100	T	A
B2b1a1~	C->T	C	T	2	100	C	A
B2b1a1~	C->T	C	T	3	100	C	A
B2b1a1~	G->C	G	C	3	100	G	A
B2b1a1~	C->T	C	T	2	100	C	A
B2b1a1~	G->A	G	A	4	100	G	A
B2b1a1~	A->G	A	G	3	100	A	A
B2b1a1~	G->A	G	A	2	100	G	A
B2b1a1~	G->A	G	A	2	100	G	A
B2b1a1~	C->A	C	A	2	100	C	A
B2b1a1~	A->G	A	G	2	100	A	A
B2b1a1~	G->T	G	T	4	100	G	A
B2b1a1~	G->T	G	T	2	100	G	A
B2b1a1~	A->G	A	G	4	100	A	A
B2b1a1~	T->G	T	G	2	100	T	A
B2b1a1~	C->T	C	T	3	100	C	A
B2b1a1~	A->G	A	G	2	100	A	A
B2b1a1~	T->C	T	C	2	100	T	A
B2b1a1~	C->T	C	T	2	100	C	A
B2b1a1~	A->T	A	T	3	100	A	A
B2b1a1~	T->A	T	A	4	100	T	A
B2b1a1~	G->A	G	A	2	100	G	A
B2b1a1~	C->A	C	A	3	100	C	A
B2b1a1~	T->C	T	C	2	100	T	A
B2b1a1~	C->T	C	T	2	100	C	A
B2b1a1~	C->T	C	T	4	100	C	A
B2b1a1~	C->G	C	G	3	100	C	A
B2b1a1~	A->G	A	G	2	100	A	A
B2b1a1~	T->C	T	C	2	100	T	A
B2b1a1~	G->C	G	C	2	100	G	A
B2b1a1~	C->T	C	T	3	100	C	A
B2b1a1~	C->A	C	A	5	100	C	A
B2b1a1~	T->C	T	C	3	100	T	A
B2b1a1~	G->A	G	A	2	100	G	A
B2b1a1~	T->C	T	C	2	100	T	A
B2b1a1~	G->T	G	T	3	100	G	A
B2b1a1~	A->C	A	C	2	100	A	A
B2b1a1~	C->T	C	T	2	100	C	A
B2b1a1~	A->G	A	G	5	100	A	A
B2b1a1~	A->G	A	G	2	100	A	A
B2b1a1~	T->G	T	G	2	100	T	A
B2b1a1~	G->T	G	T	2	100	G	A
B2b1a1~	C->T	C	T	3	100	C	A
B2b1a1~	C->T	C	T	4	100	C	A
B2b1a1~	A->G	A	G	2	100	A	A
B2b1a1~	C->G	C	G	2	100	C	A
B2b1a2a2~	G->A	G	A	5	100	G	A
B2b1a2a2~	T->G	T	G	3	100	T	A
B2b1a2a2~	G->C	G	C	2	100	G	A
B2b1a2a~	A->G	A	G	2	100	A	A
B2b1a2a~	A->G	A	G	2	100	A	A
B2b1a2a~	C->T	C	T	2	100	C	A
B2b1a2a~	C->G	C	G	4	100	C	A
B2b1a2a~	T->A	T	A	5	100	T	A
B2b1a2a~	G->A	G	A	3	100	G	A
B2b1a2a~	T->C	T	C	2	100	T	A
B2b1a2a~	C->T	C	T	3	100	C	A
B2b1a2a~	C->T	C	T	5	100	C	A
B2b1a2a~	A->G	A	G	3	100	A	A
B2b1a2a~	G->A	G	A	4	100	G	A
B2b1a2a~	G->C	G	C	2	100	G	A
B2b1a2a~	A->G	A	G	3	100	A	A
B2b1a2a~	G->A	G	A	2	100	G	A
B2b1a2a~	G->A	G	A	2	100	G	A
B2b1a2a~	G->A	G	A	2	100	G	A
B2b1a2a~	G->T	G	T	5	100	G	A
B2b1a2a~	G->T	G	T	2	100	G	A
B2b1a2a~	A->G	A	G	4	100	A	A
B2b1a2a~	G->A	G	A	2	100	G	A
B2b1a2a~	T->G	T	G	5	100	T	A
B2b1a2a~	G->A	G	A	3	100	G	A
B2b1a2a~	T->C	T	C	5	100	T	A
B2b1a2a~	C->G	C	G	3	100	C	A
B2b1a2a~	C->T	C	T	2	100	C	A
B2b1a2a~	G->C	G	C	4	100	G	A
B2b1a2a~	A->C	A	C	2	100	A	A
B2b1a2a~	C->T	C	T	4	100	C	A
B2b1a2a~	A->T	A	T	2	100	A	A
B2b1a2a~	G->A	G	A	2	100	G	A
B2b1a2a~	T->C	T	C	3	100	T	A
B2b1a2a~	T->G	T	G	3	100	T	A
B2b1a2a~	C->A	C	A	2	100	C	A
B2b1a2a~	A->T	A	T	3	100	A	A
B2b1a2a~	G->T	G	T	2	100	G	A
B2b1a2a~	T->C	T	C	4	100	T	A
B2b1a2a~	A->G	A	G	3	100	A	A
B2b1a2a~	C->T	C	T	3	100	C	A
B2b1a2a~	G->C	G	C	3	100	G	A
B2b1a2a~	G->A	G	A	2	100	G	A
B2b1a2a~	G->A	G	A	2	100	G	A
B2b1a2a~	G->A	G	A	2	100	G	A
B2b1a2a~	A->G	A	G	2	100	A	A
B2b1a2a~	G->T	G	T	2	100	G	A
B2b1a2a~	G->A	G	A	2	100	G	A
B2b1a2a~	C->T	C	T	4	100	C	A
B2b1a2a~	G->T	G	T	2	100	G	A
B2b1a2a~	G->A	G	A	3	100	G	A
B2b1a2a~	A->G	A	G	2	100	A	A
B2b1a2a~	C->A	C	A	2	100	C	A
B2b1a2a~	C->T	C	T	2	100	C	A
B2b1a2a~	C->G	C	G	3	100	C	A
B2b1a2a~	G->A	G	A	2	100	G	A
B2b1a2a~	T->A	T	A	3	100	T	A
B2b1a2a~	G->T	G	T	3	100	G	A
B2b1a2a~	C->T	C	T	2	100	C	A
B2b1a2a~	C->T	C	T	2	100	C	A
B2b1a2a~	C->G	C	G	3	100	C	A
B2b1a2a~	T->C	T	C	4	100	T	A
B2b1a2a~	C->T	C	T	2	100	C	A
B2b1a2a~	G->A	G	A	4	100	G	A
B2b1a2a~	C->T	C	T	2	100	C	A
B2b1a2a~	G->A	G	A	3	100	G	A
B2b1a2a~	G->A	G	A	3	100	G	A
B2b1a2a~	T->C	T	C	3	100	T	A
B2b1a2a~	T->C	T	C	3	100	T	A
B2b1a2a~	T->C	T	C	4	100	T	A
B2b1a2a~	A->G	A	G	2	100	A	A
B2b1a2a~	C->T	C	T	2	100	C	A
B2b1a2a~	G->C	G	C	4	100	G	A
B2b1a2a~	G->T	G	T	2	100	G	A
B2b1a2a~	C->T	C	T	2	100	C	A
B2b1a2a~	G->T	G	T	2	100	G	A
B2b1a2a~	C->T	C	T	2	100	C	A
B2b1a2b1~	C->T	C	T	2	100	C	A
B2b1a2b1~	G->A	G	A	2	100	G	A
B2b1a2b2a~	A->G	A	G	3	100	A	A
B2b1a2b2a~	A->G	A	G	2	100	A	A
B2b1a2b2~	A->G	A	G	2	100	A	A
B2b1a2b2~	A->C	A	C	3	100	A	A
B2b1a2b2~	G->A	G	A	3	100	G	A
B2b1a2b~	C->T	C	T	2	100	C	A
B2b1a2b~	G->A	G	A	2	100	G	A
B2b1a2b~	C->A	C	A	2	100	C	A
B2b1a2b~	A->G	A	G	5	100	A	A
B2b1a2b~	A->C	A	C	2	100	A	A
B2b1a2b~	G->T	G	T	2	100	G	A
B2b1a2b~	G->A	G	A	3	100	G	A
B2b1a2b~	G->A	G	A	3	100	G	A
B2b1a2b~	G->A	G	A	3	100	G	A
B2b1a2~	A->G	A	G	4	100	A	A
B2b1a2~	G->T	G	T	2	100	G	A
B2b1a2~	C->T	C	T	2	100	C	A
B2b1a2~	G->T	G	T	4	100	G	A
B2b1a2~	G->A	G	A	3	100	G	A
B2b1a2~	G->A	G	A	3	100	G	A
B2b1a2~	A->G	A	G	2	100	A	A
B2b1a2~	G->A	G	A	6	100	G	A
B2b1a2~	C->T	C	T	3	100	C	A
B2b1a2~	G->C	G	C	3	100	G	A
B2b1a2~	G->A	G	A	4	100	G	A
B2b1a2~	G->A	G	A	6	100	G	A
B2b1a2~	C->T	C	T	2	100	C	A
B2b1a2~	G->C	G	C	2	100	G	A
B2b1a2~	C->T	C	T	2	100	C	A
B2b1a2~	G->A	G	A	3	100	G	A
B2b1a2~	G->C	G	C	6	100	G	A
B2b1a2~	A->G	A	G	2	100	A	A
B2b1a2~	G->A	G	A	2	100	G	A
B2b1a2~	T->G	T	G	3	100	T	A
B2b1a2~	G->A	G	A	2	100	G	A
B2b1a2~	G->T	G	T	2	100	G	A
B2b1a2~	G->T	G	T	2	100	G	A
B2b1a2~	C->G	C	G	2	100	C	A
B2b1a2~	T->C	T	C	3	100	T	A
B2b1a2~	G->C	G	C	2	100	G	A
B2b1a2~	A->C	A	C	2	100	A	A
B2b1a2~	A->C	A	C	5	100	A	A
B2b1a2~	G->A	G	A	2	100	G	A
B2b1a2~	T->C	T	C	2	100	T	A
B2b1a2~	G->T	G	T	2	100	G	A
B2b1a2~	C->T	C	T	3	100	C	A
B2b1a2~	G->T	G	T	3	100	G	A
B2b1a~	C->T	C	T	2	100	C	A
B2b1a~	T->G	T	G	2	100	T	A
B2b1a~	T->A	T	A	2	100	T	A
B2b1a~	G->C	G	C	2	100	G	A
B2b1b1b~	G->C	G	C	3	100	G	A
B2b1b1b~	C->T	C	T	2	100	C	A
B2b1b1b~	T->A	T	A	3	100	T	A
B2b1b1b~	C->G	C	G	7	100	C	A
B2b1b1b~	A->C	A	C	4	100	A	A
B2b1b~	G->A	G	A	2	100	G	A
B2b1b~	C->T	C	T	2	100	C	A
B2b1b~	T->C	T	C	5	100	T	A
B2b1b~	G->A	G	A	3	100	G	A
B2b1b~	C->T	C	T	3	100	C	A
B2b1b~	T->A	T	A	4	100	T	A
B2b1b~	G->A	G	A	2	100	G	A
B2b1b~	C->T	C	T	2	100	C	A
B2b1b~	C->T	C	T	2	100	C	A
B2b1b~	C->A	C	A	4	100	C	A
B2b1b~	T->G	T	G	4	100	T	A
B2b1~	G->A	G	A	2	100	G	A
B2b1~	C->A	C	A	3	100	C	A
B2b1~	A->G	A	G	4	100	A	A
B2b1~	G->C	G	C	2	100	G	A
B2b1~	C->T	C	T	3	100	C	A
B2b1~	C->G	C	G	3	100	C	A
B2b1~	T->C	T	C	2	100	T	A
B2b1~	C->T	C	T	2	100	C	A
B2b1~	A->C	A	C	5	100	A	A
B2b1~	C->G	C	G	2	100	C	A
B2b4~	G->A	G	A	3	100	G	A
B2b4~	C->T	C	T	2	100	C	A
B2b4~	G->C	G	C	2	100	G	A
B2~	A->G	A	G	2	100	A	A
B2~	A->T	A	T	2	100	A	A
B2~	T->C	T	C	5	100	T	A
B2~	C->A	C	A	2	100	C	A
B2~	G->A	G	A	2	100	G	A
B2~	A->G	A	G	2	100	A	A
B2~	G->A	G	A	2	100	G	A
B2~	A->T	A	T	2	100	A	A
B2~	C->T	C	T	2	100	C	A
B2~	T->C	T	C	2	100	T	A
B2~	G->A	G	A	3	100	G	A
B2~	G->A	G	A	3	100	G	A
B2~	C->A	C	A	2	100	C	A
B2~	C->T	C	T	3	100	C	A
B2~	C->T	C	T	2	100	C	A
B2~	C->A	C	A	3	100	C	A
B2~	G->A	G	A	2	100	G	A
B2~	G->A	G	A	2	100	G	A
B2~	G->T	G	T	2	100	G	A
B2~	G->C	G	C	2	100	G	A
B2~	G->A	G	A	3	100	G	A
B2~	C->T	C	T	2	100	C	A
B2~	C->T	C	T	5	100	C	A
B2~	A->G	A	G	2	100	A	A
B2~	C->T	C	T	3	100	C	A
B2~	A->G	A	G	4	100	A	A
B2~	G->A	G	A	3	100	G	A
B2~	C->A	C	A	2	100	C	A
B2~	T->A	T	A	2	100	T	A
B2~	G->C	G	C	3	100	G	A
B2~	A->G	A	G	2	100	A	A
B2~	G->A	G	A	2	100	G	A
B2~	C->G	C	G	2	100	C	A
B2~	A->G	A	G	3	100	A	A
B2~	C->T	C	T	4	100	C	A
B2~	T->C	T	C	2	100	T	A
B2~	C->T	C	T	3	100	C	A
B2~	C->A	C	A	2	100	C	A
B2~	C->T	C	T	2	100	C	A
B2~	A->G	A	G	2	100	A	A
B2~	G->A	G	A	2	100	G	A
B2~	G->A	G	A	3	100	G	A
B2~	C->T	C	T	3	100	C	A
B2~	T->G	T	G	2	100	T	A
B2~	C->T	C	T	2	100	C	A
B2~	G->C	G	C	2	100	G	A
B2~	T->G	T	G	2	100	T	A
B2~	G->A	G	A	3	100	G	A
B2~	T->C	T	C	2	100	T	A
B2~	A->G	A	G	3	100	A	A
B2~	C->T	C	T	3	100	C	A
B2~	A->G	A	G	2	100	A	A
B2~	T->C	T	C	3	100	T	A
B2~	T->C	T	C	2	100	T	A
B2~	G->A	G	A	2	100	G	A
B2~	A->T	A	T	5	100	A	A
B2~	G->A	G	A	2	100	G	A
B2~	C->T	C	T	2	100	C	A
B2~	G->A	G	A	3	100	G	A
B2~	G->A	G	A	2	100	G	A
B2~	G->A	G	A	3	100	G	A
B2~	C->T	C	T	2	100	C	A
B2~	A->T	A	T	3	100	A	A
B2~	T->C	T	C	2	100	T	A
B2~	G->T	G	T	2	100	G	A
B2~	G->A	G	A	2	100	G	A
B3	A->G	A	G	2	100	A	A
B3	G->T	G	T	2	100	G	A
B3a	G->C	G	C	2	100	G	A
B3a	C->T	C	T	2	100	C	A
B3a	T->A	T	A	3	100	T	A
B3a	T->C	T	C	2	100	T	A
B3a	C->A	C	A	2	100	C	A
B3a	C->T	C	T	3	100	C	A
B3a	T->A	T	A	5	100	T	A
B3a	A->T	A	T	3	100	A	A
B3a	G->A	G	A	2	100	G	A
B3a	A->G	A	G	5	100	A	A
B3a	C->G	C	G	5	100	C	A
B3a	T->C	T	C	2	100	T	A
B3a	A->G	A	G	2	100	A	A
B3a	C->T	C	T	4	100	C	A
B3a	A->T	A	T	2	100	A	A
B3a	A->G	A	G	4	100	A	A
B3a	G->A	G	A	2	100	G	A
B3a	T->C	T	C	2	100	T	A
B3a	G->A	G	A	4	100	G	A
B3a	C->T	C	T	2	100	C	A
B3a	G->C	G	C	3	100	G	A
B3a	G->T	G	T	4	100	G	A
B3a	G->A	G	A	2	100	G	A
B3a	A->C	A	C	5	100	A	A
B3a	G->T	G	T	2	100	G	A
B3a	G->A	G	A	2	100	G	A
B3a2~	C->G	C	G	4	100	C	A
B3b~	G->A	G	A	2	100	G	A
B3b~	C->G	C	G	4	100	C	A
B3~	C->T	C	T	2	100	C	A
B3~	A->G	A	G	2	100	A	A
B3~	T->A	T	A	4	100	T	A
B3~	A->G	A	G	2	100	A	A
B3~	G->A	G	A	2	100	G	A
B3~	T->C	T	C	3	100	T	A
B3~	A->G	A	G	2	100	A	A
B3~	C->A	C	A	3	100	C	A
B3~	G->A	G	A	3	100	G	A
B3~	G->C	G	C	5	100	G	A
B3~	T->C	T	C	2	100	T	A
B3~	T->C	T	C	4	100	T	A
B3~	T->C	T	C	2	100	T	A
B3~	T->A	T	A	2	100	T	A
B3~	A->G	A	G	3	100	A	A
B3~	T->C	T	C	4	100	T	A
B3~	G->A	G	A	4	100	G	A
B3~	C->A	C	A	3	100	C	A
B3~	C->T	C	T	2	100	C	A
B3~	G->A	G	A	2	100	G	A
B3~	G->T	G	T	2	100	G	A
B3~	A->G	A	G	2	100	A	A
B3~	T->C	T	C	4	100	T	A
B3~	A->G	A	G	3	100	A	A
B3~	G->A	G	A	2	100	G	A
B3~	C->A	C	A	2	100	C	A
B3~	G->T	G	T	2	100	G	A
B3~	C->G	C	G	2	100	C	A
B3~	G->C	G	C	2	100	G	A
B3~	C->A	C	A	3	100	C	A
B3~	T->A	T	A	4	100	T	A
B3~	A->G	A	G	2	100	A	A
B3~	T->C	T	C	2	100	T	A
B3~	T->C	T	C	2	100	T	A
B3~	A->G	A	G	2	100	A	A
B3~	C->A	C	A	2	100	C	A
B3~	C->T	C	T	3	100	C	A
B3~	G->A	G	A	2	100	G	A
B3~	T->A	T	A	2	100	T	A
B3~	C->T	C	T	3	100	C	A
B3~	C->G	C	G	2	100	C	A
B3~	C->T	C	T	2	100	C	A
B3~	A->G	A	G	3	100	A	A
B3~	G->T	G	T	3	100	G	A
B3~	G->C	G	C	3	100	G	A
B3~	G->A	G	A	2	100	G	A
B3~	G->C	G	C	2	100	G	A
B3~	C->T	C	T	2	100	C	A
B3~	G->A	G	A	2	100	G	A
B3~	A->C	A	C	2	100	A	A
B3~	A->G	A	G	3	100	A	A
B3~	C->G	C	G	3	100	C	A
B3~	G->A	G	A	2	100	G	A
B3~	G->T	G	T	2	100	G	A
B3~	C->T	C	T	2	100	C	A
B3~	C->G	C	G	2	100	C	A
B3~	G->A	G	A	2	100	G	A
B3~	G->C	G	C	2	100	G	A
B3~	G->C	G	C	2	100	G	A
B3~	G->A	G	A	2	100	G	A
B3~	G->A	G	A	2	100	G	A
B3~	C->T	C	T	2	100	C	A
B3~	G->A	G	A	3	100	G	A
B3~	C->T	C	T	2	100	C	A
B3~	A->T	A	T	4	100	A	A
B3~	G->A	G	A	2	100	G	A
B3~	G->A	G	A	2	100	G	A
B3~	C->A	C	A	4	100	C	A
B3~	G->A	G	A	4	100	G	A
B3~	G->A	G	A	3	100	G	A
B3~	G->A	G	A	2	100	G	A
B3~	G->T	G	T	3	100	G	A
B3~	C->G	C	G	2	100	C	A
B3~	G->A	G	A	3	100	G	A
B3~	T->C	T	C	2	100	T	A
B3~	T->C	T	C	5	100	T	A
B3~	G->A	G	A	2	100	G	A
B3~	C->T	C	T	4	100	C	A
B3~	G->A	G	A	7	100	G	A
B3~	G->T	G	T	2	100	G	A
B3~	C->A	C	A	3	100	C	A
B3~	A->G	A	G	2	100	A	A
B3~	C->G	C	G	4	100	C	A
B3~	G->T	G	T	4	100	G	A
B3~	T->G	T	G	2	100	T	A
B3~	C->T	C	T	2	100	C	A
B3~	C->T	C	T	3	100	C	A
B3~	T->C	T	C	2	100	T	A
B3~	C->G	C	G	2	100	C	A
B3~	G->A	G	A	2	100	G	A
B3~	G->T	G	T	2	100	G	A
B3~	C->T	C	T	7	100	C	A
B3~	C->T	C	T	3	100	C	A
B3~	G->A	G	A	3	100	G	A
B3~	G->A	G	A	3	100	G	A
B3~	T->C	T	C	2	100	T	A
B3~	T->C	T	C	4	100	T	A
B3~	C->T	C	T	2	100	C	A
B3~	G->A	G	A	4	100	G	A
B3~	T->C	T	C	3	100	T	A
B3~	T->A	T	A	3	100	T	A
B3~	C->T	C	T	2	100	C	A
B3~	G->C	G	C	3	100	G	A
B3~	T->C	T	C	3	100	T	A
B3~	A->G	A	G	2	100	A	A
B3~	T->G	T	G	2	100	T	A
B3~	A->G	A	G	2	100	A	A
B3~	G->A	G	A	3	100	G	A
B3~	C->G	C	G	3	100	C	A
B3~	G->C	G	C	3	100	G	A
B3~	C->T	C	T	3	100	C	A
B3~	G->T	G	T	2	100	G	A
B3~	C->T	C	T	2	100	C	A
B3~	C->T	C	T	3	100	C	A
B3~	C->T	C	T	3	100	C	A
B3~	G->C	G	C	2	100	G	A
B3~	C->A	C	A	2	100	C	A
B3~	C->A	C	A	3	100	C	A
B3~	G->T	G	T	2	100	G	A
B3~	G->C	G	C	2	100	G	A
B3~	C->T	C	T	4	100	C	A
B3~	G->A	G	A	5	100	G	A
B3~	A->G	A	G	3	100	A	A
B3~	T->A	T	A	2	100	T	A
B3~	A->C	A	C	4	100	A	A
B3~	T->A	T	A	2	100	T	A
B3~	T->C	T	C	2	100	T	A
B3~	A->G	A	G	5	100	A	A
B3~	G->C	G	C	2	100	G	A
B3~	A->G	A	G	2	100	A	A
B3~	C->T	C	T	4	100	C	A
B3~	A->T	A	T	2	100	A	A
B3~	C->T	C	T	3	100	C	A
B3~	C->G	C	G	2	100	C	A
B3~	G->A	G	A	2	100	G	A
B3~	T->G	T	G	2	100	T	A
B3~	G->A	G	A	2	100	G	A
B3~	T->C	T	C	4	100	T	A
B3~	G->A	G	A	3	100	G	A
B3~	C->T	C	T	3	100	C	A
B3~	G->A	G	A	4	100	G	A
B3~	C->T	C	T	2	100	C	A
B3~	G->A	G	A	3	100	G	A
B3~	G->T	G	T	2	100	G	A
B3~	C->A	C	A	2	100	C	A
B3~	G->T	G	T	3	100	G	A
B3~	T->C	T	C	3	100	T	A
B3~	G->C	G	C	2	100	G	A
B3~	A->G	A	G	2	100	A	A
B3~	A->G	A	G	2	100	A	A
B3~	T->C	T	C	2	100	T	A
B3~	G->A	G	A	3	100	G	A
B3~	G->A	G	A	2	100	G	A
B3~	T->C	T	C	2	100	T	A
B3~	G->A	G	A	3	100	G	A
B3~	T->C	T	C	2	100	T	A
B3~	C->A	C	A	2	100	C	A
B3~	C->T	C	T	2	100	C	A
B3~	A->G	A	G	3	100	A	A
B3~	G->A	G	A	2	100	G	A
B3~	T->A	T	A	3	100	T	A
B3~	A->C	A	C	5	100	A	A
B3~	T->C	T	C	2	100	T	A
B3~	C->A	C	A	2	100	C	A
B3~	G->A	G	A	2	100	G	A
B3~	G->A	G	A	2	100	G	A
B3~	G->T	G	T	2	100	G	A
B3~	G->A	G	A	2	100	G	A
B3~	A->G	A	G	2	100	A	A
BT	C->T	C	T	3	100	T	D
BT	C->T	C	T	3	100	T	D
BT	T->C	T	C	2	100	C	D
BT	G->A	G	A	3	100	A	D
BT	T->C	T	C	2	100	C	D
BT	G->A	G	A	4	100	A	D
BT	C->T	C	T	2	100	T	D
BT	C->T	C	T	2	100	T	D
BT	G->A	G	A	2	100	A	D
BT	C->T	C	T	4	100	T	D
BT	C->T	C	T	2	100	T	D
BT	T->A	T	A	2	100	A	D
BT	C->T	C	T	2	100	T	D
BT	T->C	T	C	2	100	C	D
BT	C->T	C	T	4	100	T	D
BT	C->A	C	A	2	100	A	D
BT	T->C	T	C	3	100	C	D
BT	T->C	T	C	4	100	C	D
BT	T->G	T	G	4	100	G	D
BT	C->T	C	T	2	100	T	D
BT	T->C	T	C	2	100	C	D
BT	C->T	C	T	2	100	T	D
BT	C->T	C	T	2	100	T	D
BT	C->T	C	T	2	100	T	D
BT	T->C	T	C	2	100	C	D
BT	G->T	G	T	3	100	T	D
BT	G->T	G	T	3	100	T	D
BT	T->C	T	C	2	100	C	D
BT	G->A	G	A	3	100	A	D
BT	C->T	C	T	3	100	T	D
BT	A->C	A	C	2	100	C	D
BT	C->A	C	A	6	100	A	D
BT	T->A	T	A	3	100	A	D
BT	G->T	G	T	2	100	T	D
BT	G->T	G	T	3	100	T	D
BT	G->A	G	A	3	100	A	D
BT	A->T	A	T	2	100	T	D
BT	G->C	G	C	2	100	C	D
BT	A->G	A	G	4	100	G	D
BT	G->A	G	A	2	100	A	D
BT	A->G	A	G	3	100	G	D
BT	G->A	G	A	3	100	A	D
BT	C->T	C	T	2	100	T	D
BT	G->A	G	A	2	100	A	D
BT	G->C	G	C	3	100	C	D
BT	A->G	A	G	2	100	G	D
BT	A->G	A	G	2	100	G	D
BT	A->C	A	C	3	100	C	D
BT	C->G	C	G	5	100	G	D
BT	G->A	G	A	2	100	A	D
BT	C->T	C	T	2	100	T	D
BT	T->C	T	C	3	100	C	D
BT	C->T	C	T	2	100	T	D
BT	G->A	G	A	2	100	A	D
BT	T->A	T	A	6	100	A	D
BT	G->A	G	A	4	100	A	D
BT	G->A	G	A	5	100	A	D
BT	C->A	C	A	2	100	A	D
BT	G->A	G	A	3	100	A	D
BT	G->C	G	C	2	100	C	D
BT	G->C	G	C	2	100	C	D
BT	A->C	A	C	2	100	C	D
BT	T->C	T	C	2	100	C	D
BT	C->T	C	T	4	100	T	D
BT	T->C	T	C	2	100	C	D
BT	C->G	C	G	4	100	G	D
BT	T->C	T	C	3	100	C	D
BT	A->G	A	G	2	100	G	D
BT	G->C	G	C	2	100	C	D
BT	T->C	T	C	3	100	C	D
BT	A->G	A	G	2	100	G	D
BT	T->C	T	C	2	100	C	D
BT	G->C	G	C	3	100	C	D
BT	G->A	G	A	2	100	A	D
BT	A->G	A	G	2	100	G	D
BT	G->A	G	A	4	100	A	D
BT	C->G	C	G	3	100	G	D
BT	G->A	G	A	2	100	A	D
BT	A->G	A	G	4	100	G	D
BT	A->G	A	G	4	100	G	D
BT	A->C	A	C	4	100	C	D
BT	G->T	G	T	2	100	T	D
BT	G->A	G	A	2	100	A	D
BT	G->A	G	A	2	100	A	D
BT	G->A	G	A	2	100	A	D
BT	G->A	G	A	2	100	A	D
BT	C->T	C	T	3	100	T	D
BT	T->C	T	C	4	100	C	D
BT	C->T	C	T	2	100	T	D
BT	T->A	T	A	2	100	A	D
BT	T->C	T	C	2	100	C	D
BT	A->G	A	G	3	100	G	D
BT	C->T	C	T	2	100	T	D
BT	C->T	C	T	4	100	T	D
BT	G->A	G	A	3	100	A	D
BT	T->C	T	C	2	100	C	D
BT	A->C	A	C	2	100	C	D
BT	C->A	C	A	3	100	A	D
BT	G->C	G	C	2	100	C	D
BT	A->T	A	T	3	100	T	D
BT	G->C	G	C	2	100	C	D
BT	G->A	G	A	5	100	A	D
BT	C->G	C	G	2	100	G	D
BT	C->G	C	G	2	100	G	D
BT	G->A	G	A	3	100	A	D
BT	A->T	A	T	4	100	T	D
BT	A->G	A	G	2	100	G	D
BT	T->C	T	C	2	100	C	D
BT	A->T	A	T	3	100	T	D
BT	G->A	G	A	3	100	A	D
BT	T->C	T	C	4	100	C	D
BT	C->A	C	A	2	100	A	D
BT	A->G	A	G	7	100	G	D
BT	T->A	T	A	4	100	A	D
BT	T->G	T	G	2	100	G	D
BT	C->T	C	T	2	100	T	D
BT	C->T	C	T	2	100	T	D
BT	C->T	C	T	3	100	T	D
BT	C->T	C	T	2	100	T	D
BT	C->T	C	T	2	100	T	D
BT	C->A	C	A	2	100	A	D
BT	G->A	G	A	2	100	A	D
BT	A->G	A	G	2	100	G	D
BT	G->T	G	T	2	100	T	D
BT	G->A	G	A	4	100	A	D
B~	G->T	G	T	2	100	G	A
B~	T->A	T	A	2	100	T	A
B~	C->G	C	G	2	100	C	A
B~	A->G	A	G	3	100	A	A
B~	A->G	A	G	2	100	A	A
B~	C->T	C	T	2	100	C	A
B~	A->G	A	G	2	100	A	A
B~	C->T	C	T	2	100	C	A
B~	C->T	C	T	3	100	C	A
B~	C->A	C	A	2	100	C	A
B~	T->G	T	G	2	100	T	A
B~	C->G	C	G	4	100	C	A
B~	G->A	G	A	3	100	G	A
C	C->T	C	T	2	100	C	A
C	G->A	G	A	3	100	G	A
C	C->T	C	T	3	100	C	A
C	C->T	C	T	3	100	C	A
C	C->T	C	T	2	100	C	A
C	C->T	C	T	3	100	C	A
C	A->C	A	C	2	100	A	A
C	A->G	A	G	2	100	A	A
C	G->A	G	A	2	100	G	A
C	C->T	C	T	2	100	C	A
C	T->C	T	C	4	100	T	A
C	T->C	T	C	2	100	T	A
C	G->A	G	A	3	100	G	A
C	C->T	C	T	2	100	C	A
C	C->T	C	T	3	100	C	A
C	C->T	C	T	3	100	C	A
C	G->A	G	A	2	100	G	A
C	C->T	C	T	2	100	C	A
C	T->C	T	C	3	100	T	A
C	G->A	G	A	3	100	G	A
C	C->T	C	T	2	100	C	A
C	G->A	G	A	2	100	G	A
C	T->C	T	C	2	100	T	A
C	T->C	T	C	3	100	T	A
C	A->T	A	T	3	100	A	A
C	T->C	T	C	2	100	T	A
C	A->C	A	C	2	100	A	A
C	A->T	A	T	2	100	A	A
C	A->C	A	C	4	100	A	A
C	C->G	C	G	2	100	C	A
C	C->G	C	G	2	100	C	A
C	A->G	A	G	3	100	A	A
C	T->C	T	C	2	100	T	A
C	C->G	C	G	2	100	C	A
C	G->A	G	A	5	100	G	A
C	C->T	C	T	2	100	C	A
C	T->C	T	C	3	100	T	A
C	A->G	A	G	2	100	A	A
C	A->C	A	C	2	100	A	A
C	C->T	C	T	3	100	C	A
C	C->T	C	T	3	100	C	A
C	G->T	G	T	2	100	G	A
C	C->T	C	T	2	100	C	A
C	C->G	C	G	3	100	C	A
C	A->C	A	C	2	100	A	A
C	C->T	C	T	4	100	C	A
C	C->T	C	T	3	100	C	A
C	A->G	A	G	2	100	A	A
C	C->A	C	A	2	100	C	A
C	C->T	C	T	2	100	C	A
C	G->A	G	A	3	100	G	A
C	C->A	C	A	2	100	C	A
C	T->C	T	C	4	100	T	A
C	T->C	T	C	2	100	T	A
C	C->G	C	G	3	100	C	A
C1	C->T	C	T	2	100	C	A
C1a	G->A	G	A	2	100	G	A
C1a	C->T	C	T	2	100	C	A
C1a	A->G	A	G	2	100	A	A
C1a	A->T	A	T	4	100	A	A
C1a	C->A	C	A	2	100	C	A
C1a	A->G	A	G	2	100	A	A
C1a	C->T	C	T	2	100	C	A
C1a	G->A	G	A	2	100	G	A
C1a	C->G	C	G	2	100	C	A
C1a	C->A	C	A	2	100	C	A
C1a	C->T	C	T	4	100	C	A
C1a	A->G	A	G	2	100	A	A
C1a	C->T	C	T	2	100	C	A
C1a	C->T	C	T	5	100	C	A
C1a	A->C	A	C	2	100	A	A
C1a	C->T	C	T	4	100	C	A
C1a1	G->T	G	T	2	100	G	A
C1a1a	C->T	C	T	2	100	C	A
C1a1a1a	T->A	T	A	2	100	T	A
C1a1a1a	C->T	C	T	2	100	C	A
C1a1a1a1	A->G	A	G	3	100	A	A
C1a1a1a1	G->A	G	A	4	100	G	A
C1a1a1a1	C->T	C	T	2	100	C	A
C1a1a1a1a~	G->T	G	T	2	100	G	A
C1a1a1a1b~	T->A	T	A	2	100	T	A
C1a1a1a1b~	A->G	A	G	2	100	A	A
C1a1a1a1b~	C->T	C	T	4	100	C	A
C1a1a1a2~	T->C	T	C	2	100	T	A
C1a1a1a2~	C->T	C	T	2	100	C	A
C1a1a1a2~	G->A	G	A	2	100	G	A
C1a1a1a2~	T->C	T	C	3	100	T	A
C1a1a1a2~	C->T	C	T	4	100	C	A
C1a1a1a2~	G->A	G	A	4	100	G	A
C1a1a1a2~	C->T	C	T	2	100	C	A
C1a1a1a2~	G->A	G	A	2	100	G	A
C1a1a1a2~	C->A	C	A	2	100	C	A
C1a1a1a2~	A->G	A	G	4	100	A	A
C1a1a1a2~	G->T	G	T	2	100	G	A
C1a1a1a2~	C->T	C	T	3	100	C	A
C1a1a1a2~	C->A	C	A	2	100	C	A
C1a1a1a2~	A->G	A	G	2	100	A	A
C1a1a1a2~	A->C	A	C	4	100	A	A
C1a1a1a2~	A->C	A	C	2	100	A	A
C1a1a1b	C->A	C	A	6	100	C	A
C1a1a1b	C->A	C	A	3	100	C	A
C1a1a1b	G->T	G	T	5	100	G	A
C1a1a1b	T->C	T	C	2	100	T	A
C1a1a1b	C->A	C	A	2	100	C	A
C1a1a1b	T->C	T	C	2	100	T	A
C1a1a1b2~	C->G	C	G	3	100	C	A
C1a1a1b2~	A->T	A	T	2	100	A	A
C1a1a2~	C->G	C	G	2	100	C	A
C1a1a2~	C->A	C	A	3	100	C	A
C1a1a2~	C->A	C	A	3	100	C	A
C1a1~	G->T	G	T	2	100	G	A
C1a1~	T->C	T	C	3	100	T	A
C1a1~	G->A	G	A	3	100	G	A
C1a1~	C->T	C	T	2	100	C	A
C1a1~	C->T	C	T	2	100	C	A
C1a1~	G->A	G	A	3	100	G	A
C1a1~	C->T	C	T	2	100	C	A
C1a1~	C->G	C	G	2	100	C	A
C1a1~	G->T	G	T	5	100	G	A
C1a1~	G->A	G	A	3	100	G	A
C1a1~	G->A	G	A	2	100	G	A
C1a1~	A->T	A	T	2	100	A	A
C1a1~	G->A	G	A	3	100	G	A
C1a1~	G->A	G	A	2	100	G	A
C1a1~	A->G	A	G	2	100	A	A
C1a1~	G->C	G	C	3	100	G	A
C1a1~	C->T	C	T	2	100	C	A
C1a1~	A->G	A	G	2	100	A	A
C1a1~	G->C	G	C	2	100	G	A
C1a1~	A->T	A	T	6	100	A	A
C1a1~	C->A	C	A	3	100	C	A
C1a1~	G->T	G	T	2	100	G	A
C1a1~	C->G	C	G	2	100	C	A
C1a1~	G->A	G	A	2	100	G	A
C1a1~	C->T	C	T	3	100	C	A
C1a1~	A->G	A	G	2	100	A	A
C1a1~	G->A	G	A	2	100	G	A
C1a1~	G->A	G	A	2	100	G	A
C1a1~	A->G	A	G	2	100	A	A
C1a1~	C->T	C	T	2	100	C	A
C1a1~	G->C	G	C	2	100	G	A
C1a1~	G->T	G	T	2	100	G	A
C1a1~	T->C	T	C	4	100	T	A
C1a1~	G->A	G	A	2	100	G	A
C1a1~	C->A	C	A	2	100	C	A
C1a1~	C->T	C	T	2	100	C	A
C1a1~	C->A	C	A	2	100	C	A
C1a1~	C->T	C	T	2	100	C	A
C1a1~	G->T	G	T	3	100	G	A
C1a1~	G->A	G	A	5	100	G	A
C1a1~	T->C	T	C	2	100	T	A
C1a1~	C->A	C	A	2	100	C	A
C1a1~	C->A	C	A	2	100	C	A
C1a1~	G->C	G	C	3	100	G	A
C1a1~	G->A	G	A	3	100	G	A
C1a1~	C->T	C	T	2	100	C	A
C1a1~	T->C	T	C	2	100	T	A
C1a1~	T->C	T	C	4	100	T	A
C1a1~	T->C	T	C	2	100	T	A
C1a1~	G->A	G	A	2	100	G	A
C1a1~	A->G	A	G	3	100	A	A
C1a1~	C->G	C	G	2	100	C	A
C1a1~	G->A	G	A	2	100	G	A
C1a1~	T->C	T	C	2	100	T	A
C1a1~	C->G	C	G	2	100	C	A
C1a1~	G->T	G	T	3	100	G	A
C1a1~	T->C	T	C	2	100	T	A
C1a1~	A->G	A	G	4	100	A	A
C1a1~	G->A	G	A	6	100	G	A
C1a1~	C->T	C	T	6	100	C	A
C1a1~	A->G	A	G	2	100	A	A
C1a1~	A->G	A	G	2	100	A	A
C1a1~	T->A	T	A	2	100	T	A
C1a1~	T->C	T	C	2	100	T	A
C1a1~	G->T	G	T	3	100	G	A
C1a1~	T->A	T	A	2	100	T	A
C1a1~	C->T	C	T	3	100	C	A
C1a1~	C->A	C	A	4	100	C	A
C1a1~	G->A	G	A	2	100	G	A
C1a1~	A->G	A	G	3	100	A	A
C1a1~	C->T	C	T	2	100	C	A
C1a1~	C->T	C	T	2	100	C	A
C1a1~	A->G	A	G	2	100	A	A
C1a1~	C->G	C	G	2	100	C	A
C1a1~	A->G	A	G	2	100	A	A
C1a1~	C->G	C	G	5	100	C	A
C1a1~	C->G	C	G	2	100	C	A
C1a1~	A->G	A	G	2	100	A	A
C1a1~	G->A	G	A	5	100	G	A
C1a1~	T->C	T	C	3	100	T	A
C1a1~	T->A	T	A	2	100	T	A
C1a1~	C->A	C	A	2	100	C	A
C1a1~	T->G	T	G	2	100	T	A
C1a1~	G->A	G	A	2	100	G	A
C1a1~	G->A	G	A	2	100	G	A
C1a1~	T->C	T	C	4	100	T	A
C1a1~	C->T	C	T	2	100	C	A
C1a1~	A->C	A	C	2	100	A	A
C1a1~	G->A	G	A	2	100	G	A
C1a1~	G->A	G	A	4	100	G	A
C1a1~	A->G	A	G	2	100	A	A
C1a2	G->C	G	C	2	100	G	A
C1a2	A->G	A	G	2	100	A	A
C1a2	A->G	A	G	2	100	A	A
C1a2	A->G	A	G	3	100	A	A
C1a2	G->T	G	T	2	100	G	A
C1a2	A->G	A	G	2	100	A	A
C1a2	T->C	T	C	2	100	T	A
C1a2	G->A	G	A	2	100	G	A
C1a2	T->C	T	C	2	100	T	A
C1a2	C->T	C	T	3	100	C	A
C1a2	T->A	T	A	3	100	T	A
C1a2	G->C	G	C	2	100	G	A
C1a2	T->A	T	A	3	100	T	A
C1a2	G->T	G	T	5	100	G	A
C1a2	T->A	T	A	2	100	T	A
C1a2	A->G	A	G	2	100	A	A
C1a2	T->A	T	A	5	100	T	A
C1a2	C->A	C	A	2	100	C	A
C1a2	G->C	G	C	2	100	G	A
C1a2	C->T	C	T	3	100	C	A
C1a2	T->A	T	A	2	100	T	A
C1a2	G->A	G	A	2	100	G	A
C1a2	A->T	A	T	2	100	A	A
C1a2	G->A	G	A	2	100	G	A
C1a2	A->T	A	T	4	100	A	A
C1a2	T->C	T	C	3	100	T	A
C1a2	T->C	T	C	3	100	T	A
C1a2	C->A	C	A	3	100	C	A
C1a2	G->A	G	A	2	100	G	A
C1a2	T->C	T	C	2	100	T	A
C1a2	G->A	G	A	4	100	G	A
C1a2	A->C	A	C	3	100	A	A
C1a2	C->T	C	T	2	100	C	A
C1a2	G->A	G	A	3	100	G	A
C1a2	T->G	T	G	2	100	T	A
C1a2	G->C	G	C	3	100	G	A
C1a2	G->A	G	A	2	100	G	A
C1a2	C->T	C	T	4	100	C	A
C1a2	G->A	G	A	4	100	G	A
C1a2	C->T	C	T	2	100	C	A
C1a2	C->A	C	A	2	100	C	A
C1a2	T->G	T	G	3	100	T	A
C1a2	A->G	A	G	2	100	A	A
C1a2	T->C	T	C	3	100	T	A
C1a2	G->A	G	A	2	100	G	A
C1a2	A->C	A	C	2	100	A	A
C1a2	C->T	C	T	2	100	C	A
C1a2a	G->A	G	A	3	100	G	A
C1a2a	T->C	T	C	2	100	T	A
C1a2a	G->A	G	A	2	100	G	A
C1a2a	A->G	A	G	2	100	A	A
C1a2a	A->C	A	C	2	100	A	A
C1a2a	G->A	G	A	2	100	G	A
C1a2a	G->A	G	A	2	100	G	A
C1a2a	G->A	G	A	3	100	G	A
C1a2a	C->T	C	T	3	100	C	A
C1a2a	G->A	G	A	2	100	G	A
C1a2a	A->G	A	G	2	100	A	A
C1a2a	A->G	A	G	2	100	A	A
C1a2a1	C->T	C	T	3	100	C	A
C1a2a1	T->C	T	C	2	100	T	A
C1a2a1	C->G	C	G	4	100	C	A
C1a2a1	T->C	T	C	2	100	T	A
C1a2a1	G->T	G	T	2	100	G	A
C1a2a1	G->C	G	C	3	100	G	A
C1a2a1	T->G	T	G	4	100	T	A
C1a2a1	A->G	A	G	3	100	A	A
C1a2a1	G->T	G	T	2	100	G	A
C1a2a1	A->G	A	G	3	100	A	A
C1a2a1	A->C	A	C	3	100	A	A
C1a2a1	A->T	A	T	2	100	A	A
C1a2a1	G->A	G	A	2	100	G	A
C1a2a1	C->G	C	G	2	100	C	A
C1a2a1	A->G	A	G	2	100	A	A
C1a2a1	G->C	G	C	3	100	G	A
C1a2a1	G->A	G	A	3	100	G	A
C1a2a1	G->C	G	C	3	100	G	A
C1a2a1	A->G	A	G	2	100	A	A
C1a2a1	C->A	C	A	3	100	C	A
C1a2a1	G->A	G	A	2	100	G	A
C1a2a1	G->A	G	A	3	100	G	A
C1a2a1	G->A	G	A	3	100	G	A
C1a2a1	G->A	G	A	2	100	G	A
C1a2a1	T->C	T	C	2	100	T	A
C1a2a1	C->A	C	A	3	100	C	A
C1a2a1	C->A	C	A	2	100	C	A
C1a2a1a	G->T	G	T	2	100	G	A
C1a2a1a2~	C->T	C	T	2	100	C	A
C1a2a1b	G->A	G	A	3	100	G	A
C1a2a1b1~	G->A	G	A	3	100	G	A
C1a2a1b1~	C->A	C	A	2	100	C	A
C1a2a1b2~	G->A	G	A	2	100	G	A
C1a2a1b2~	A->T	A	T	3	100	A	A
C1a2a1b3~	T->G	T	G	4	100	T	A
C1a2a1b3~	G->C	G	C	2	100	G	A
C1a2a1c~	T->C	T	C	3	100	T	A
C1a2a2	T->C	T	C	2	100	T	A
C1a2a2	T->C	T	C	2	100	T	A
C1a2a2	C->A	C	A	4	100	C	A
C1a2a2	C->T	C	T	2	100	C	A
C1a2a2	C->T	C	T	3	100	C	A
C1a2a2	A->C	A	C	2	100	A	A
C1a2a2	T->C	T	C	2	100	T	A
C1a2a2	T->A	T	A	3	100	T	A
C1a2a2	T->C	T	C	3	100	T	A
C1a2a2	G->A	G	A	2	100	G	A
C1a2a2	G->C	G	C	3	100	G	A
C1a2a2	T->G	T	G	3	100	T	A
C1a2a2	T->G	T	G	2	100	T	A
C1a2a2	G->T	G	T	3	100	G	A
C1a2a2	A->G	A	G	3	100	A	A
C1a2a2	T->C	T	C	2	100	T	A
C1a2a2	G->A	G	A	3	100	G	A
C1a2a2	G->A	G	A	3	100	G	A
C1a2a2	A->T	A	T	2	100	A	A
C1a2a2	G->A	G	A	2	100	G	A
C1a2a2	C->T	C	T	4	100	C	A
C1a2a2	C->T	C	T	4	100	C	A
C1a2a2	G->A	G	A	3	100	G	A
C1a2a2	T->C	T	C	5	100	T	A
C1a2a2	A->G	A	G	2	100	A	A
C1a2a2	A->G	A	G	4	100	A	A
C1a2a2	G->A	G	A	3	100	G	A
C1a2a2	A->T	A	T	2	100	A	A
C1a2a2a~	T->C	T	C	2	100	T	A
C1a2a2a~	A->T	A	T	2	100	A	A
C1a2a2b~	C->A	C	A	5	100	C	A
C1a2a2b~	A->T	A	T	6	100	A	A
C1a2b	C->A	C	A	2	100	C	A
C1a2b	G->C	G	C	2	100	G	A
C1a2b	G->C	G	C	2	100	G	A
C1a2b	C->A	C	A	4	100	C	A
C1a2b	C->G	C	G	4	100	C	A
C1a2b	C->T	C	T	3	100	C	A
C1a2b	G->A	G	A	3	100	G	A
C1a2b	G->T	G	T	4	100	G	A
C1a2b	A->G	A	G	3	100	A	A
C1a2b	C->T	C	T	2	100	C	A
C1a2b	C->T	C	T	2	100	C	A
C1a2b	G->A	G	A	2	100	G	A
C1a2b	C->T	C	T	2	100	C	A
C1a2b	C->T	C	T	2	100	C	A
C1a2b	G->A	G	A	5	100	G	A
C1a2b	T->C	T	C	2	100	T	A
C1a2b	G->T	G	T	3	100	G	A
C1a2b	C->T	C	T	2	100	C	A
C1a2b	G->T	G	T	2	100	G	A
C1a2b	G->A	G	A	3	100	G	A
C1a2b	G->C	G	C	2	100	G	A
C1a2b	C->T	C	T	2	100	C	A
C1a2b	C->A	C	A	4	100	C	A
C1a2b	G->T	G	T	2	100	G	A
C1a2b	A->T	A	T	2	100	A	A
C1a2b	C->G	C	G	2	100	C	A
C1a2b	G->T	G	T	2	100	G	A
C1a2b	G->A	G	A	2	100	G	A
C1a2b	A->T	A	T	2	100	A	A
C1a2b2~	A->G	A	G	2	100	A	A
C1a2~	C->T	C	T	2	100	C	A
C1b1a1	G->A	G	A	3	100	G	A
C1b1a1	G->A	G	A	2	100	G	A
C1b1a1	T->C	T	C	4	100	T	A
C1b1a1	T->C	T	C	2	100	T	A
C1b1a1	T->C	T	C	3	100	T	A
C1b1a1	C->G	C	G	3	100	C	A
C1b1a1	C->T	C	T	2	100	C	A
C1b1a1	C->G	C	G	3	100	C	A
C1b1a1	C->T	C	T	2	100	C	A
C1b1a1	T->A	T	A	3	100	T	A
C1b1a1	G->A	G	A	4	100	G	A
C1b1a1	G->A	G	A	2	100	G	A
C1b1a1	G->A	G	A	2	100	G	A
C1b1a1	G->A	G	A	3	100	G	A
C1b1a1	G->C	G	C	2	100	G	A
C1b1a1	G->A	G	A	4	100	G	A
C1b1a1	T->C	T	C	2	100	T	A
C1b1a1	A->G	A	G	2	100	A	A
C1b1a1	G->A	G	A	2	100	G	A
C1b1a1	G->A	G	A	2	100	G	A
C1b1a1	C->G	C	G	2	100	C	A
C1b1a1	C->T	C	T	2	100	C	A
C1b1a1	T->C	T	C	3	100	T	A
C1b1a1	C->T	C	T	2	100	C	A
C1b1a1	C->T	C	T	2	100	C	A
C1b1a1	A->G	A	G	4	100	A	A
C1b1a1	C->T	C	T	2	100	C	A
C1b1a1	T->C	T	C	2	100	T	A
C1b1a1	A->G	A	G	2	100	A	A
C1b1a1	G->A	G	A	2	100	G	A
C1b1a1	C->T	C	T	2	100	C	A
C1b1a1	A->G	A	G	2	100	A	A
C1b1a1	C->G	C	G	2	100	C	A
C1b1a1	T->C	T	C	4	100	T	A
C1b1a1	C->T	C	T	2	100	C	A
C1b1a1	T->G	T	G	4	100	T	A
C1b1a1	G->T	G	T	2	100	G	A
C1b1a1	C->A	C	A	2	100	C	A
C1b1a1	G->A	G	A	3	100	G	A
C1b1a1a	T->G	T	G	2	100	T	A
C1b1a1a	G->A	G	A	3	100	G	A
C1b1a1a	G->A	G	A	3	100	G	A
C1b1a1a	G->A	G	A	2	100	G	A
C1b1a1a	A->G	A	G	2	100	A	A
C1b1a1a	T->C	T	C	3	100	T	A
C1b1a1a	G->A	G	A	2	100	G	A
C1b1a1a	G->T	G	T	2	100	G	A
C1b1a1a	G->A	G	A	3	100	G	A
C1b1a1a	A->G	A	G	2	100	A	A
C1b1a1a	C->G	C	G	4	100	C	A
C1b1a1a	T->C	T	C	2	100	T	A
C1b1a1a	G->A	G	A	3	100	G	A
C1b1a1a	G->T	G	T	4	100	G	A
C1b1a1a	A->G	A	G	5	100	A	A
C1b1a1a	A->G	A	G	2	100	A	A
C1b1a1a	C->T	C	T	2	100	C	A
C1b1a1a	T->C	T	C	2	100	T	A
C1b1a1a	C->T	C	T	2	100	C	A
C1b1a1a1	G->A	G	A	4	100	G	A
C1b1a1a1	T->A	T	A	3	100	T	A
C1b1a1a1	G->A	G	A	3	100	G	A
C1b1a1a1	G->A	G	A	2	100	G	A
C1b1a1a1	C->T	C	T	2	100	C	A
C1b1a1a1	C->G	C	G	2	100	C	A
C1b1a1a1	G->A	G	A	3	100	G	A
C1b1a1a1	T->G	T	G	2	100	T	A
[truncated: 20,969 more rows]

## Sheet: 10.MDS pops information
Supplementary Data 10. Individuals used in the MDS analysis
Individual ID	Population ID	Label	Publication	Culture
I1577	Austria_KremsWA3	Austria_KremsWA3	Fu et al., 2016	Gravettian
GoyetQ116-1	Belgium_UP_GoyetQ116_1_published_all	Belgium_UP_GoyetQ116_1	Fu et al., 2016	Aurignacian
GoyetQ-2	Belgium_UP_Magdalenian	Belgium_UP_Magdalenian	Fu et al., 2016	Magdalenian
I1875	Croatia_Mesolithic_HG	Croatia_Mesolithic_HG	Mathieson et al., 2018	HG
Vestonice13	Czech_Vestonice13	Czech_Vestonice13	Fu et al., 2016	Gravettian
Vestonice16	Czech_Vestonice16	Czech_Vestonice16	Fu et al., 2016	Gravettian
Vestonice43	Czech_Vestonice43	Czech_Vestonice43	Fu et al., 2016	Gravettian
ZlatyKun	Czech_ZlatyKun	Czech_ZlatyKun	Prufer et al., 2021	UP
Chaudardes1	France_Chaudardes_published	France_Chaudardes	Fu et al., 2016	WHG
Iboussieres31-2	France_Iboussieres31_2	France_Iboussieres31_2	Mathieson et al., 2018	WHG
Ranchot88	France_Ranchot88_published	France_Ranchot88	Fu et al., 2016	WHG
Rochedane	France_Rochedane	France_Rochedane	Mathieson et al., 2018	WHG
KK1	Georgia_Kotias.SG	Georgia_Kotias	Jones et al., 2015	CHG
SATP	Georgia_Satsurblia.SG	Georgia_Satsurblia	Jones et al., 2015	CHG
I0018	Germany_EN_LBK_Stuttgart_published.DG	Germany_EN_LBK_Stuttgart	Lazaridis et al., 2014	Early_Neolithic
Falkenstein	Germany_Falkenstein	Germany_Falkenstein	Mathieson et al., 2018	WHG
I1507	Hungary_EN_HG_Koros_published.SG	Hungary_EN_HG_Koros	Gamba et al., 2014	Early_Neolithic
AC16	Italy_AareneCandide16	Italy_AreneCandide16	Posth et al., 2023	Epigravettian
R11	Italy_Mesolithic.SG	Italy_Continenza	Antonio et al., 2019	HG
R15	Italy_Mesolithic.SG	Italy_Continenza	Antonio et al., 2019	HG
R7	Italy_Mesolithic.SG	Italy_Continenza	Antonio et al., 2019	HG
Villabruna	Italy_North_Villabruna_HG	Italy_Villabruna	Fu et al., 2016	Epigravettian
PA12	Italy_Paglicci12	Italy_Paglicci12	Posth et al., 2023	Gravettian
PRD	Italy_Pradis	Italy_Pradis	Posth et al., 2023	Epigravettian
RIP	Italy_RiparoTagliente	Italy_RiparoTagliente	Bortolini et al., 2021	Epigravettian
STO2	Italy_SanTeodoro	Italy_SanTeodoro	Posth et al., 2023	Epigravettian
STO3	Italy_SanTeodoro	Italy_SanTeodoro	Scorrano et al., 2022	Epigravettian
STO5	Italy_SanTeodoro	Italy_SanTeodoro	Scorrano et al., 2022	Epigravettian
I2158	Italy_Sicily_HG_OrienteC	Italy_OrienteC	Mathieson et al., 2018; Catalano et al., 2020	Epigravettian
Ostuni1	Italy_South_HG_Ostuni1	Italy_Ostuni1	Fu et al., 2016	Gravettian
Paglicci133	Italy_South_HG_Paglicci133_published	Italy_Paglicci133	Fu et al., 2016	Gravettian
UZZ096	Italy_Uzzo_EM	Italy_Uzzo_EM	Ye et al., 2022	Epigravettian
UZZ5054	Italy_Uzzo_EM	Italy_Uzzo_EM	Ye et al., 2022	Epigravettian
I4432	Latvia_HG	Latvia_HG	Mathieson et al., 2018	EHG
I4434	Latvia_HG	Latvia_HG	Mathieson et al., 2018	EHG
I4438	Latvia_HG	Latvia_HG	Mathieson et al., 2018	EHG
I4439	Latvia_HG	Latvia_HG	Mathieson et al., 2018	EHG
I4440	Latvia_HG	Latvia_HG	Mathieson et al., 2018	EHG
I4441	Latvia_HG	Latvia_HG	Mathieson et al., 2018	EHG
I4550	Latvia_HG	Latvia_HG	Mathieson et al., 2018	EHG
I4551	Latvia_HG	Latvia_HG	Mathieson et al., 2018	EHG
I4552	Latvia_HG	Latvia_HG	Mathieson et al., 2018	EHG
I4553	Latvia_HG	Latvia_HG	Mathieson et al., 2018	EHG
I4626	Latvia_HG	Latvia_HG	Mathieson et al., 2018	EHG
I4628	Latvia_HG	Latvia_HG	Mathieson et al., 2018	EHG
I4595	Latvia_HG	Latvia_HG	Mathieson et al., 2018	EHG
I4596	Latvia_HG	Latvia_HG	Mathieson et al., 2018	EHG
I4630	Latvia_HG	Latvia_HG	Mathieson et al., 2018	EHG
I4632	Latvia_HG	Latvia_HG	Mathieson et al., 2018	EHG
I0001	Luxembourg_Loschbour	Luxembourg_Loschbour	Mathieson et al., 2018	WHG
Hum1	Norway_Mesolithic.SG	Norway_Mesolithic	Gunther et al., 2018	EHG
Hum2	Norway_Mesolithic.SG	Norway_Mesolithic	Gunther et al., 2018	EHG
M95	Romania_IronGates_Mesolithic.SG	Romania_IronGates_Mesolithic	Gonzalez-Fortes et al., 2017	EHG
M96	Romania_IronGates_Mesolithic.SG	Romania_IronGates_Mesolithic	Gonzalez-Fortes et al., 2017	EHG
I5408	Romania_IronGates_Mesolithic.SG	Romania_IronGates_Mesolithic	Gonzalez-Fortes et al., 2017	EHG
Muierii2	Romania_Muierii	Romania_Muierii	Fu et al., 2016
Oase1	Romania_Oase	Romania_Oase	Fu et al., 2015
AfontovaGora3	Russia_AfontovaGora3	Russia_AfontovaGora3	Fu et al., 2016	EHG
UzOO77	Russia_EHG	Russia_EHG	Mittnik et al., 2018	EHG
I0211	Russia_HG_Karelia	Russia_HG_Karelia	Mathieson et al., 2015	EHG
I0061	Russia_HG_Karelia	Russia_HG_Karelia	Mathieson et al., 2015	EHG
I0124	Russia_HG_Samara	Russia_HG_Samara	Mathieson et al., 2015	EHG
Kostenki14	Russia_Kostenki14	Russia_Kostenki14	Fu et al., 2016
MA1	Russia_MA1_HG.SG	Russia_MA1_HG	Raghavan et al., 2013	EHG
Popovo2	Russia_Popovo_HG	Russia_Popovo_HG	Mittnik et al., 2018	EHG
I8743	Russia_Sidelkino_HG.SG	Russia_Sidelkino_HG	Damgaard et al., 2018	EHG
Sunghir1	Russia_Sunghir1.SG	Russia_Sunghir1	Sikora et al., 2017
Ust_Ishim	Russia_Ust_Ishim_HG_published.DG	Russia_Ust_Ishim_HG	Fu et al., 2014
I4871	Serbia_IronGates_Mesolithic	Serbia_IronGates_Mesolithic	Mathieson et al., 2018	EHG
I4872	Serbia_IronGates_Mesolithic	Serbia_IronGates_Mesolithic	Mathieson et al., 2018	EHG
I4873	Serbia_IronGates_Mesolithic	Serbia_IronGates_Mesolithic	Mathieson et al., 2018	EHG
I4874	Serbia_IronGates_Mesolithic	Serbia_IronGates_Mesolithic	Mathieson et al., 2018	EHG
I4875	Serbia_IronGates_Mesolithic	Serbia_IronGates_Mesolithic	Mathieson et al., 2018	EHG
I4876	Serbia_IronGates_Mesolithic	Serbia_IronGates_Mesolithic	Mathieson et al., 2018	EHG
I4877	Serbia_IronGates_Mesolithic	Serbia_IronGates_Mesolithic	Mathieson et al., 2018	EHG
I4878	Serbia_IronGates_Mesolithic	Serbia_IronGates_Mesolithic	Mathieson et al., 2018	EHG
I4880	Serbia_IronGates_Mesolithic	Serbia_IronGates_Mesolithic	Mathieson et al., 2018	EHG
I4915	Serbia_IronGates_Mesolithic	Serbia_IronGates_Mesolithic	Mathieson et al., 2018	EHG
I4916	Serbia_IronGates_Mesolithic	Serbia_IronGates_Mesolithic	Mathieson et al., 2018	EHG
I4917	Serbia_IronGates_Mesolithic	Serbia_IronGates_Mesolithic	Mathieson et al., 2018	EHG
I5233	Serbia_IronGates_Mesolithic	Serbia_IronGates_Mesolithic	Mathieson et al., 2018	EHG
I5234	Serbia_IronGates_Mesolithic	Serbia_IronGates_Mesolithic	Mathieson et al., 2018	EHG
I5235	Serbia_IronGates_Mesolithic	Serbia_IronGates_Mesolithic	Mathieson et al., 2018	EHG
I5236	Serbia_IronGates_Mesolithic	Serbia_IronGates_Mesolithic	Mathieson et al., 2018	EHG
I5237	Serbia_IronGates_Mesolithic	Serbia_IronGates_Mesolithic	Mathieson et al., 2018	EHG
I5238	Serbia_IronGates_Mesolithic	Serbia_IronGates_Mesolithic	Mathieson et al., 2018	EHG
I5239	Serbia_IronGates_Mesolithic	Serbia_IronGates_Mesolithic	Mathieson et al., 2018	EHG
I5240	Serbia_IronGates_Mesolithic	Serbia_IronGates_Mesolithic	Mathieson et al., 2018	EHG
I5242	Serbia_IronGates_Mesolithic	Serbia_IronGates_Mesolithic	Mathieson et al., 2018	EHG
I5244	Serbia_IronGates_Mesolithic	Serbia_IronGates_Mesolithic	Mathieson et al., 2018	EHG
I5771	Serbia_IronGates_Mesolithic	Serbia_IronGates_Mesolithic	Mathieson et al., 2018	EHG
I5772	Serbia_IronGates_Mesolithic	Serbia_IronGates_Mesolithic	Mathieson et al., 2018	EHG
I5401	Serbia_IronGates_Mesolithic	Serbia_IronGates_Mesolithic	Mathieson et al., 2018	EHG
I5402	Serbia_IronGates_Mesolithic	Serbia_IronGates_Mesolithic	Mathieson et al., 2018	EHG
I5407	Serbia_IronGates_Mesolithic	Serbia_IronGates_Mesolithic	Mathieson et al., 2018	EHG
I4660	Serbia_IronGates_Mesolithic	Serbia_IronGates_Mesolithic	Mathieson et al., 2018	EHG
I4870	Serbia_IronGates_Mesolithic	Serbia_IronGates_Mesolithic	Mathieson et al., 2018	EHG
ElMiron	Spain_ElMiron	Spain_ElMiron	Fu et al., 2016	Magdalenian
Canes	Spain_HG.SG	Spain_HG	Gonzalez-Fortes et al., 2017	WHG
Chan	Spain_HG.SG	Spain_HG	Gonzalez-Fortes et al., 2017	WHG
I0585 (LaBrana1)	Spain_HG_published.SG	Spain_LaBraña	Olalde et al., 2014	WHG
StoraForvar11	Sweden_HG.SG	Sweden_HG	Skoglund et al., 2014	EHG
SBj	Sweden_Mesolithic.SG	Sweden_Mesolithic	Gunther et al., 2018	EHG
SF12	Sweden_Mesolithic.SG	Sweden_Mesolithic	Gunther et al., 2018	EHG
SF9	Sweden_Mesolithic.SG	Sweden_Mesolithic	Gunther et al., 2018	EHG
I0013	Sweden_Motala_HG	Sweden_Motala_HG	Lazaridis et al., 2014	EHG
I0011	Sweden_Motala_HG	Sweden_Motala_HG	Lazaridis et al., 2014	EHG
I0015	Sweden_Motala_HG	Sweden_Motala_HG	Lazaridis et al., 2014	EHG
I0012	Sweden_Motala_HG	Sweden_Motala_HG	Lazaridis et al., 2014	EHG
I0014	Sweden_Motala_HG	Sweden_Motala_HG	Lazaridis et al., 2014	EHG
I0017	Sweden_Motala_HG	Sweden_Motala_HG	Lazaridis et al., 2014	EHG
MotalaAA	Sweden_Motala_HG	Sweden_Motala_HG	Lazaridis et al., 2014	EHG
Bichon	Switzerland_Bichon.SG	Switzerland_Bichon	Jones et al., 2015	WHG
I1819	Ukraine_Mesolithic	Ukraine_Mesolithic	Mathieson et al., 2018	EHG
I5876	Ukraine_Mesolithic	Ukraine_Mesolithic	Mathieson et al., 2018	EHG
I1763	Ukraine_Mesolithic	Ukraine_Mesolithic	Mathieson et al., 2018	EHG
I1733	Ukraine_Mesolithic	Ukraine_Mesolithic	Mathieson et al., 2018	EHG
References
Antonio ML, Gao Z, Moots HM, Lucci M, Candilio F, Sawyer S, Oberreiter V, Calderon D, Devitofranceschi K, et al. 2019. Ancient Rome: A genetic crossroads of Europe and the Mediterranean. Science 366(6466):708-714
Bortolini E, Pagani E, Oxilia G, Posth C et al. 2021. Early Alpine occupation backdates westward human migration in Late Glacial Europe. Curr. Biol. 31:1-10
Catalano G, Lo Vetro D., Fabbri PF et al. 2020. Late Upper Palaeolithic hunter-gatherers in the Central Mediterranean: New archaeological and genetic data from the Late Epigravettian burial Oriente C (Favignana, Sicily). Quaternary International 537:24-32
Fu Q, Li H, Moorjani P, Jay F, Slepchenko SM, Bondarev AA, Johnson PL, Aximu-Petri A, Prüfer K, de Filippo C, Meyer M, et al. 2014. Genome sequence of a 45,000-year-old modern human from western Siberia. Nature 514(7523):445-9
Fu Q, Hajdinjak M, Moldovan O.T, Constantin S, Mallick S, Skoglund P, et al. 2015. An early modern human from Romania with recent Neanderthal ancestor. Nature 524: 216-219
Fu Q, Posth C, Hajdinjak M, Petr M, Mallick S, Fernandes D, Furtwangler A, Haak W, Meyer M, Mittnik A et al. 2016. The genetic history of Ice Age Europe. Nature. 534(7606):200-205
Gamba C, Jones R.J, Teasdale M.D, McLaughlin R.L, Gonzalez-Fortes G, et al. 2014. Genome flux and stasis in a five millennium transect of European prehistory. Nat. Commun. 5, 5257
Gonzalez-Fortes, Jones E.R, Lightfoot E, Bonsall C, Lazar C, et al. 2017. Paloegenomic evidence for multi-generational mixing between Neolithic farmers and Mesolithic hunter-gatherers in the lower Danube Basin. Curr Biol. 27(12): 1801-1810
Günther T, Malmström H, Svensson E.M, Omrak A, Sánchez-Quinto F, et al. 2018. Population genomics of Mesolithic Scandinavia: Investigating early postglacial migration routes and high-latitude adaptation. PLoS Biol 16(1): e2003703
Jones E, Gonzalez-Fortes G, Connell S, et al. 2015. Upper Palaeolithic genomes reveal deep roots of modern Eurasians. Nat Commun 6, 8912
Lazaridis I, Patterson N, Mittnik A, Renaud G, Mallick S, Kirsanow K, Sudmant P.H, et. al. 2014. Ancient human genomes suggest three ancestral populations for present-day Europeans. Nature 513(7518):409-413
Mathieson, I., Alpaslan-Roodenberg, S., Posth, C. et al. 2018. The genomic history of southeastern Europe. Nature 555, 197–203
Olalde I, Allentoft M.E, Sánchez-Quinto F, Santpere G, Chiang C.W, DeGiorgio M, Prado-Martinez J, et al. 2014. Derived immune and ancestral pigmentation alleles in a 7,000-year-old Mesolithic European. Nature 507(7491):224-228
Posth, C., Yu, H., Ghalichi, A. et al. 2023. Palaeogenomics of Upper Palaeolithic to Neolithic European hunter-gatherers. Nature 615, 117–126
Prüfer K, Posth C, Yu H, Stoessel A, Spyrou MA, Deviese T, Mattonai M, et al. 2021. A genome sequence from a modern human skull over 45,000 years old from Zlatý kůň in Czechia. Nat Ecol Evol. 5(6):820-825
Skoglund P, Malmström H, Omrak A, Raghavan M, Valdiosera C, Günther T, et al. 2014. Genomic diversity and admixture differs for Stone-Age Scandinavian foragers and farmers. Science, 344(6185):747-750
Scorrano G, Nielsen SH, Vetro DL, Sawafuji R, Mackie M, Margaryan A, Fotakis AK, Martínez-Labarga C, et al. 2022. Genomic ancestry, diet and microbiomes of Upper Palaeolithic hunter-gatherers from San Teodoro cave. Commun Biol. 5(1):1262
Yu H, van de Loosdrecht MS, Mannino MA, Talamo S, Rohrlach AB, Childebayeva A, Villalba-Mouco V, et al., 2022. Genomic and dietary discontinuities during the Mesolithic and Neolithic in Sicily. iScience, 25(5): 104244

[truncated: 18 more sheets: 11.Outgroup-f3 statistics, 12.PCA pops information, 13.F4-statistics, 14.F4-statistics, 15. qpAdm, 16.qpWave, 17.qpGraph, 18.PMR, 19.hapROH, 20.F4-statistics, 21.F4-statistics, 22.Neanderthal Admixture, 23.HIRISPLEX-S_output, 24.SNPs, 25.MtDNA, 26.Pre-Neolithic mitogenomes, 27.Mitogenomes for Beast, 28. BEAST Results]
