# Supplementary material for: Life history and ancestry of the late Upper Palaeolithic infant from Grotta delle Mura, Italy
Source: Springer Nature journal article supplement (doi:10.1038/s41467-024-51150-x), 2024-09-20
Supplement: MOESM6 [file 41467_2024_51150_MOESM6_ESM.xlsx]

## Sheet: Figure 4a + S6b
Figure 4a + Supplementary Figure 6b: MDS plot and genetic affinity among post-LGM Italian hunter-gatherers
Dissimilarity matrix for MDS analysis based on 1-outgroup f3-statistics
	Czech_Vestonice13	Czech_Vestonice16	Austria_KremsWA3	Czech_Vestonice43	Italy_Ostuni1	Russia_Sunghir1	Russia_Kostenki14	Romania_Muierii	Italy_Paglicci133	Italy_Paglicci12	Belgium_UP_GoyetQ116_1	Spain_ElMiron	Belgium_UP_Magdalenian	Russia_HG_Karelia	Russia_EHG	Russia_Sidelkino_HG	Russia_HG_Samara	Ukraine_Mesolithic	Russia_Popovo_HG	Russia_MA1_HG	Russia_AfontovaGora3	Italy_OrienteC	Italy_Uzzo_EM	Italy_LeMura1	Italy_SanTeodoro	Italy_AreneCandide16	Italy_Continenza	Italy_Villabruna	Italy_RiparoTagliente	Switzerland_Bichon	Croatia_Mesolithic_HG	France_Chaudardes	France_Ranchot88	Luxembourg_Loschbour	France_Rochedane	Germany_Falkenstein	France_Iboussieres31_2	Italy_Pradis	Hungary_EN_HG_Koros	Spain_LaBraña	Spain_HG	Serbia_IronGates_Mesolithic	Latvia_HG	Romania_IronGates_Mesolithic	Sweden_Motala_HG	Sweden_Mesolithic	Sweden_HG	Norway_Mesolithic	Romania_Oase
Czech_Vestonice13	0	0.649597	0.640426	0.697452	0.691746	0.712792	0.7237	0.725798	0.702599	0.69529	0.726081	0.725591	0.722634	0.737896	0.741386	0.745564	0.743307	0.738895	0.738569	0.746533	0.759134	0.716911	0.725349	0.723177	0.722424	0.723471	0.722367	0.722227	0.727913	0.728571	0.725648	0.728537	0.724542	0.735747	0.723775	0.723357	0.731289	0.728161	0.730261	0.728426	0.728468	0.730351	0.727901	0.735381	0.736168	0.734918	0.751816	0.738481	0.779514
Czech_Vestonice16	0.649597	0	0.661216	0.704576	0.699162	0.714126	0.727725	0.73234	0.716574	0.699327	0.731828	0.724689	0.728309	0.740201	0.744144	0.74544	0.748515	0.738178	0.733791	0.742847	0.754112	0.722761	0.720936	0.72319	0.721567	0.720725	0.722946	0.724748	0.72137	0.726308	0.720194	0.728342	0.722442	0.734134	0.726548	0.728648	0.731535	0.730408	0.72898	0.730371	0.726292	0.72923	0.73092	0.733681	0.733376	0.735977	0.747198	0.739031	0.789047
Austria_KremsWA3	0.640426	0.661216	0	0.680605	0.698228	0.714624	0.727025	0.733848	0.720048	0.693531	0.728155	0.719034	0.72562	0.741051	0.738644	0.744085	0.742466	0.730892	0.736769	0.744569	0.746603	0.711372	0.709987	0.711776	0.710696	0.715681	0.714815	0.714642	0.709532	0.717278	0.718781	0.71225	0.718082	0.727907	0.719194	0.717775	0.726156	0.730788	0.725434	0.718801	0.723853	0.72325	0.723779	0.72797	0.728803	0.729831	0.744263	0.733776	0.785784
Czech_Vestonice43	0.697452	0.704576	0.680605	0	0.699481	0.723739	0.72715	0.718204	0.709256	0.702344	0.733113	0.721049	0.725221	0.744596	0.747866	0.744459	0.754444	0.739178	0.742954	0.751616	0.749466	0.71395	0.709601	0.713536	0.710193	0.713878	0.712842	0.718309	0.717275	0.71984	0.709743	0.709918	0.715395	0.732032	0.720211	0.731406	0.734068	0.720659	0.727047	0.730961	0.726342	0.726871	0.728019	0.731643	0.731706	0.734995	0.741096	0.739062	0.79145
Italy_Ostuni1	0.691746	0.699162	0.698228	0.699481	0	0.721537	0.732426	0.734565	0.688693	0.659397	0.732852	0.725616	0.730427	0.744839	0.748908	0.749539	0.752703	0.740047	0.741336	0.748124	0.753467	0.720576	0.717396	0.722004	0.719059	0.721843	0.721561	0.720979	0.724925	0.725381	0.722309	0.726499	0.720923	0.735548	0.727523	0.731356	0.731211	0.723835	0.732757	0.727983	0.729052	0.730312	0.730578	0.735816	0.73689	0.738039	0.744481	0.743017	0.781332
Russia_Sunghir1	0.712792	0.714126	0.714624	0.723739	0.721537	0	0.715574	0.73216	0.723875	0.713274	0.733909	0.735748	0.73515	0.746703	0.75065	0.751801	0.750702	0.744731	0.741734	0.743971	0.752009	0.735222	0.732342	0.733806	0.732828	0.731866	0.731458	0.739054	0.735476	0.73395	0.730754	0.739804	0.735096	0.748372	0.735721	0.739346	0.744659	0.736066	0.739283	0.736912	0.734849	0.738237	0.740706	0.740406	0.742524	0.742507	0.74883	0.743161	0.791762
Russia_Kostenki14	0.7237	0.727725	0.727025	0.72715	0.732426	0.715574	0	0.725495	0.736964	0.72913	0.733651	0.737538	0.738549	0.745842	0.746698	0.751217	0.753066	0.743783	0.746311	0.74579	0.756182	0.73927	0.738038	0.738059	0.738816	0.737286	0.738166	0.738719	0.736347	0.737324	0.737734	0.74491	0.737211	0.747576	0.738292	0.74505	0.741543	0.739851	0.741483	0.738357	0.738045	0.740249	0.741268	0.74172	0.742874	0.742828	0.75274	0.744858	0.788168
Romania_Muierii	0.725798	0.73234	0.733848	0.718204	0.734565	0.73216	0.725495	0	0.72436	0.73024	0.736147	0.738791	0.74554	0.749655	0.756488	0.754326	0.755452	0.747032	0.751515	0.755398	0.75486	0.73822	0.735206	0.740725	0.735653	0.734738	0.733057	0.735493	0.735257	0.739202	0.722649	0.727279	0.737969	0.750974	0.737375	0.74104	0.731737	0.731579	0.742485	0.73968	0.737067	0.739001	0.739138	0.741054	0.741714	0.745001	0.757904	0.748012	0.780487
Italy_Paglicci133	0.702599	0.716574	0.720048	0.709256	0.688693	0.723875	0.736964	0.72436	0	0.694741	0.732639	0.738183	0.724888	0.747035	0.755854	0.751034	0.751935	0.739832	0.756044	0.75318	0.761344	0.733689	0.730262	0.73084	0.725054	0.72556	0.729757	0.727989	0.721097	0.729551	0.731425	0.748281	0.728097	0.741174	0.736954	0.743594	0.73055	0.739687	0.735191	0.732959	0.727556	0.735076	0.736001	0.73638	0.739047	0.741803	0.754878	0.743729	0.793245
Italy_Paglicci12	0.69529	0.699327	0.693531	0.702344	0.659397	0.713274	0.72913	0.73024	0.694741	0	0.729314	0.717125	0.72449	0.738736	0.742866	0.737007	0.745181	0.735325	0.732345	0.741247	0.748446	0.714462	0.712816	0.716075	0.713221	0.717201	0.714128	0.717755	0.718156	0.720464	0.716463	0.723071	0.717715	0.725139	0.720187	0.727113	0.720915	0.722688	0.724431	0.722855	0.719479	0.724124	0.726566	0.726556	0.729482	0.729344	0.737505	0.736132	0.788805
Belgium_UP_GoyetQ116_1	0.726081	0.731828	0.728155	0.733113	0.732852	0.733909	0.733651	0.736147	0.732639	0.729314	0	0.700064	0.685054	0.742693	0.74721	0.748957	0.744146	0.740963	0.73979	0.740401	0.751916	0.731746	0.7306	0.733191	0.732459	0.73362	0.729999	0.73417	0.731761	0.731712	0.731815	0.737416	0.726087	0.737067	0.728605	0.734643	0.736697	0.736857	0.73771	0.721899	0.712779	0.736672	0.734345	0.740436	0.736478	0.737475	0.74781	0.740964	0.783475
Spain_ElMiron	0.725591	0.724689	0.719034	0.721049	0.725616	0.735748	0.737538	0.738791	0.738183	0.717125	0.700064	0	0.645125	0.732649	0.734039	0.736225	0.736021	0.725572	0.729238	0.746994	0.750576	0.671841	0.673905	0.681908	0.676717	0.679691	0.680964	0.69313	0.690593	0.686238	0.695334	0.686345	0.67789	0.694814	0.683318	0.687954	0.697521	0.698567	0.708074	0.67883	0.67635	0.70495	0.705178	0.713037	0.713478	0.716998	0.731744	0.72389	0.78892
Belgium_UP_Magdalenian	0.722634	0.728309	0.72562	0.725221	0.730427	0.73515	0.738549	0.74554	0.724888	0.72449	0.685054	0.645125	0	0.734385	0.735361	0.737124	0.737131	0.729936	0.715373	0.743143	0.751561	0.705176	0.707126	0.709424	0.706923	0.704038	0.701416	0.713868	0.716945	0.697837	0.713383	0.695096	0.695483	0.713138	0.695976	0.698495	0.705468	0.713881	0.717588	0.687524	0.67398	0.717156	0.71223	0.725513	0.718998	0.720876	0.730442	0.727746	0.788016
Russia_HG_Karelia	0.737896	0.740201	0.741051	0.744596	0.744839	0.746703	0.745842	0.749655	0.747035	0.738736	0.742693	0.732649	0.734385	0	0.666829	0.680945	0.687869	0.686481	0.676222	0.709446	0.691817	0.714382	0.716529	0.715969	0.719001	0.711894	0.713203	0.715352	0.709758	0.71379	0.703623	0.712896	0.714031	0.723243	0.720127	0.716089	0.720066	0.709712	0.706473	0.71556	0.721532	0.702788	0.696182	0.706368	0.69345	0.694062	0.71296	0.688032	0.786621
Russia_EHG	0.741386	0.744144	0.738644	0.747866	0.748908	0.75065	0.746698	0.756488	0.755854	0.742866	0.74721	0.734039	0.735361	0.666829	0	0.68411	0.690782	0.68665	0.681463	0.707437	0.693471	0.718813	0.718055	0.718627	0.723002	0.718479	0.717699	0.718246	0.712617	0.720507	0.70615	0.720457	0.718433	0.732124	0.714976	0.725289	0.724389	0.709591	0.710333	0.721388	0.722651	0.707589	0.700701	0.707439	0.695596	0.698403	0.70949	0.693131	0.787878
Russia_Sidelkino_HG	0.745564	0.74544	0.744085	0.744459	0.749539	0.751801	0.751217	0.754326	0.751034	0.737007	0.748957	0.736225	0.737124	0.680945	0.68411	0	0.688652	0.688313	0.687985	0.70931	0.695942	0.715951	0.716442	0.717758	0.718557	0.713498	0.711062	0.715702	0.708955	0.714988	0.707645	0.712432	0.716841	0.727999	0.716841	0.71813	0.724676	0.71108	0.707264	0.716895	0.720817	0.705137	0.700938	0.703718	0.693104	0.693075	0.713846	0.686938	0.79167
Russia_HG_Samara	0.743307	0.748515	0.742466	0.754444	0.752703	0.750702	0.753066	0.755452	0.751935	0.745181	0.744146	0.736021	0.737131	0.687869	0.690782	0.688652	0	0.690591	0.690386	0.716056	0.696794	0.722017	0.718855	0.721064	0.723764	0.713151	0.716506	0.716548	0.713252	0.718641	0.711223	0.717022	0.72209	0.728916	0.720796	0.721402	0.719599	0.716609	0.712584	0.720993	0.727398	0.708416	0.701886	0.711459	0.698221	0.702499	0.713923	0.696041	0.792093
Ukraine_Mesolithic	0.738895	0.738178	0.730892	0.739178	0.740047	0.744731	0.743783	0.747032	0.739832	0.735325	0.740963	0.725572	0.729936	0.686481	0.68665	0.688313	0.690591	0	0.685933	0.718699	0.709824	0.703326	0.701571	0.705375	0.70827	0.700826	0.702264	0.696707	0.693441	0.703866	0.688865	0.701643	0.70245	0.715827	0.700439	0.707285	0.712011	0.692946	0.693817	0.707287	0.712192	0.68878	0.686376	0.691588	0.685745	0.687574	0.707171	0.686916	0.788358
Russia_Popovo_HG	0.738569	0.733791	0.736769	0.742954	0.741336	0.741734	0.746311	0.751515	0.756044	0.732345	0.73979	0.729238	0.715373	0.676222	0.681463	0.687985	0.690386	0.685933	0	0.712229	0.702986	0.715924	0.710378	0.714793	0.719223	0.717425	0.710645	0.711396	0.704277	0.704076	0.709034	0.702227	0.713379	0.724923	0.719004	0.707597	0.72457	0.707958	0.705742	0.711648	0.717006	0.702506	0.692989	0.699137	0.683959	0.69613	0.708868	0.679326	0.791659
Russia_MA1_HG	0.746533	0.742847	0.744569	0.751616	0.748124	0.743971	0.74579	0.755398	0.75318	0.741247	0.740401	0.746994	0.743143	0.709446	0.707437	0.70931	0.716056	0.718699	0.712229	0	0.676974	0.738508	0.741554	0.740817	0.742828	0.742656	0.740374	0.743467	0.741481	0.737835	0.736711	0.736561	0.740154	0.750103	0.741434	0.744034	0.745904	0.741011	0.738697	0.740497	0.740672	0.736218	0.729731	0.734494	0.725069	0.725101	0.738927	0.720633	0.786223
Russia_AfontovaGora3	0.759134	0.754112	0.746603	0.749466	0.753467	0.752009	0.756182	0.75486	0.761344	0.748446	0.751916	0.750576	0.751561	0.691817	0.693471	0.695942	0.696794	0.709824	0.702986	0.676974	0	0.747278	0.747145	0.747983	0.748174	0.742871	0.745952	0.745275	0.742994	0.742781	0.734701	0.737755	0.744326	0.758565	0.741933	0.741995	0.752134	0.742753	0.743185	0.744304	0.746669	0.738288	0.727765	0.739551	0.722375	0.724543	0.731621	0.716859	0.782194
Italy_OrienteC	0.716911	0.722761	0.711372	0.71395	0.720576	0.735222	0.73927	0.73822	0.733689	0.714462	0.731746	0.671841	0.705176	0.714382	0.718813	0.715951	0.722017	0.703326	0.715924	0.738508	0.747278	0	0.505139	0.578868	0.564318	0.597768	0.593504	0.618518	0.616192	0.622655	0.638498	0.642003	0.625728	0.646467	0.639904	0.637615	0.629723	0.640019	0.657623	0.652415	0.656915	0.660144	0.664029	0.669686	0.680251	0.684289	0.707237	0.694941	0.788282
Italy_Uzzo_EM	0.725349	0.720936	0.709987	0.709601	0.717396	0.732342	0.738038	0.735206	0.730262	0.712816	0.7306	0.673905	0.707126	0.716529	0.718055	0.716442	0.718855	0.701571	0.710378	0.741554	0.747145	0.505139	0	0.573347	0.555768	0.586977	0.589736	0.617627	0.612898	0.61792	0.633836	0.629493	0.621089	0.642841	0.636768	0.627779	0.633775	0.637476	0.654067	0.652893	0.652503	0.657599	0.662147	0.664395	0.678096	0.679943	0.692514	0.694393	0.788589
Italy_LeMura1	0.723177	0.72319	0.711776	0.713536	0.722004	0.733806	0.738059	0.740725	0.73084	0.716075	0.733191	0.681908	0.709424	0.715969	0.718627	0.717758	0.721064	0.705375	0.714793	0.740817	0.747983	0.578868	0.573347	0	0.582901	0.585563	0.586876	0.617144	0.608307	0.616829	0.627713	0.628804	0.627287	0.6407	0.634227	0.631915	0.637229	0.642059	0.653163	0.655302	0.652368	0.657601	0.664427	0.664861	0.680267	0.681986	0.703406	0.693714	0.791002
Italy_SanTeodoro	0.722424	0.721567	0.710696	0.710193	0.719059	0.732828	0.738816	0.735653	0.725054	0.713221	0.732459	0.676717	0.706923	0.719001	0.723002	0.718557	0.723764	0.70827	0.719223	0.742828	0.748174	0.564318	0.555768	0.582901	0	0.595358	0.597931	0.622522	0.621586	0.623376	0.63786	0.637135	0.625981	0.647352	0.637857	0.638273	0.647689	0.64773	0.659012	0.659377	0.659062	0.66516	0.669897	0.673148	0.684536	0.686702	0.703318	0.700794	0.790352
Italy_AreneCandide16	0.723471	0.720725	0.715681	0.713878	0.721843	0.731866	0.737286	0.734738	0.72556	0.717201	0.73362	0.679691	0.704038	0.711894	0.718479	0.713498	0.713151	0.700826	0.717425	0.742656	0.742871	0.597768	0.586977	0.585563	0.595358	0	0.590335	0.619247	0.610644	0.615011	0.628269	0.628591	0.620161	0.637267	0.62685	0.622496	0.629889	0.642275	0.651022	0.651275	0.653266	0.654249	0.660272	0.661667	0.678414	0.680579	0.692203	0.692741	0.788636
Italy_Continenza	0.722367	0.722946	0.714815	0.712842	0.721561	0.731458	0.738166	0.733057	0.729757	0.714128	0.729999	0.680964	0.701416	0.713203	0.717699	0.711062	0.716506	0.702264	0.710645	0.740374	0.745952	0.593504	0.589736	0.586876	0.597931	0.590335	0	0.623669	0.612689	0.614668	0.628368	0.630353	0.620838	0.640585	0.630031	0.629631	0.636425	0.638573	0.648632	0.648767	0.650983	0.654464	0.660169	0.660615	0.675759	0.677099	0.696784	0.690337	0.791708
Italy_Villabruna	0.722227	0.724748	0.714642	0.718309	0.720979	0.739054	0.738719	0.735493	0.727989	0.717755	0.73417	0.69313	0.713868	0.715352	0.718246	0.715702	0.716548	0.696707	0.711396	0.743467	0.745275	0.618518	0.617627	0.617144	0.622522	0.619247	0.623669	0	0.619014	0.643966	0.633707	0.641795	0.639551	0.66057	0.640923	0.646298	0.653509	0.650315	0.659462	0.668528	0.669838	0.657802	0.667267	0.667395	0.680508	0.68155	0.69837	0.696611	0.786409
Italy_RiparoTagliente	0.727913	0.72137	0.709532	0.717275	0.724925	0.735476	0.736347	0.735257	0.721097	0.718156	0.731761	0.690593	0.716945	0.709758	0.712617	0.708955	0.713252	0.693441	0.704277	0.741481	0.742994	0.616192	0.612898	0.608307	0.621586	0.610644	0.612689	0.619014	0	0.630518	0.62469	0.632452	0.632233	0.651957	0.639327	0.641039	0.648138	0.643199	0.651414	0.660021	0.663889	0.650924	0.661798	0.655923	0.674171	0.677354	0.697108	0.689722	0.78994
Switzerland_Bichon	0.728571	0.726308	0.717278	0.71984	0.725381	0.73395	0.737324	0.739202	0.729551	0.720464	0.731712	0.686238	0.697837	0.71379	0.720507	0.714988	0.718641	0.703866	0.704076	0.737835	0.742781	0.622655	0.61792	0.616829	0.623376	0.615011	0.614668	0.643966	0.630518	0	0.641423	0.641528	0.636191	0.655771	0.62856	0.635051	0.646109	0.651632	0.658088	0.657147	0.65632	0.66134	0.667	0.668351	0.681576	0.680905	0.702583	0.69433	0.791314
Croatia_Mesolithic_HG	0.725648	0.720194	0.718781	0.709743	0.722309	0.730754	0.737734	0.722649	0.731425	0.716463	0.731815	0.695334	0.713383	0.703623	0.70615	0.707645	0.711223	0.688865	0.709034	0.736711	0.734701	0.638498	0.633836	0.627713	0.63786	0.628269	0.628368	0.633707	0.62469	0.641423	0	0.65268	0.644405	0.661184	0.647208	0.651723	0.657883	0.648421	0.649341	0.664749	0.671394	0.646631	0.660773	0.652493	0.671454	0.678011	0.693919	0.688193	0.788738
France_Chaudardes	0.728537	0.728342	0.71225	0.709918	0.726499	0.739804	0.74491	0.727279	0.748281	0.723071	0.737416	0.686345	0.695096	0.712896	0.720457	0.712432	0.717022	0.701643	0.702227	0.736561	0.737755	0.642003	0.629493	0.628804	0.637135	0.628591	0.630353	0.641795	0.632452	0.641528	0.65268	0	0.630552	0.64506	0.643482	0.638352	0.647691	0.650092	0.675212	0.656115	0.660815	0.663454	0.664229	0.671804	0.68162	0.682041	0.688958	0.691445	0.78886
France_Ranchot88	0.724542	0.722442	0.718082	0.715395	0.720923	0.735096	0.737211	0.737969	0.728097	0.717715	0.726087	0.67789	0.695483	0.714031	0.718433	0.716841	0.72209	0.70245	0.713379	0.740154	0.744326	0.625728	0.621089	0.627287	0.625981	0.620161	0.620838	0.639551	0.632233	0.636191	0.644405	0.630552	0	0.647718	0.638365	0.62668	0.637995	0.652666	0.657476	0.656675	0.656508	0.660638	0.663228	0.672052	0.680567	0.684782	0.687132	0.69508	0.785036
Luxembourg_Loschbour	0.735747	0.734134	0.727907	0.732032	0.735548	0.748372	0.747576	0.750974	0.741174	0.725139	0.737067	0.694814	0.713138	0.723243	0.732124	0.727999	0.728916	0.715827	0.724923	0.750103	0.758565	0.646467	0.642841	0.6407	0.647352	0.637267	0.640585	0.66057	0.651957	0.655771	0.661184	0.64506	0.647718	0	0.663836	0.655229	0.664109	0.668118	0.675244	0.674587	0.674618	0.677153	0.679716	0.684628	0.692893	0.693951	0.713984	0.706319	0.794229
France_Rochedane	0.723775	0.726548	0.719194	0.720211	0.727523	0.735721	0.738292	0.737375	0.736954	0.720187	0.728605	0.683318	0.695976	0.720127	0.714976	0.716841	0.720796	0.700439	0.719004	0.741434	0.741933	0.639904	0.636768	0.634227	0.637857	0.62685	0.630031	0.640923	0.639327	0.62856	0.647208	0.643482	0.638365	0.663836	0	0.653954	0.658771	0.646668	0.664811	0.666567	0.667832	0.66613	0.668887	0.677965	0.68416	0.689533	0.698097	0.69853	0.782252
Germany_Falkenstein	0.723357	0.728648	0.717775	0.731406	0.731356	0.739346	0.74505	0.74104	0.743594	0.727113	0.734643	0.687954	0.698495	0.716089	0.725289	0.71813	0.721402	0.707285	0.707597	0.744034	0.741995	0.637615	0.627779	0.631915	0.638273	0.622496	0.629631	0.646298	0.641039	0.635051	0.651723	0.638352	0.62668	0.655229	0.653954	0	0.651651	0.656681	0.669394	0.664396	0.66443	0.667591	0.669885	0.677269	0.684605	0.689434	0.704727	0.700625	0.794618
France_Iboussieres31_2	0.731289	0.731535	0.726156	0.734068	0.731211	0.744659	0.741543	0.731737	0.73055	0.720915	0.736697	0.697521	0.705468	0.720066	0.724389	0.724676	0.719599	0.712011	0.72457	0.745904	0.752134	0.629723	0.633775	0.637229	0.647689	0.629889	0.636425	0.653509	0.648138	0.646109	0.657883	0.647691	0.637995	0.664109	0.658771	0.651651	0	0.65823	0.670046	0.667599	0.670338	0.672985	0.676504	0.684012	0.692199	0.692798	0.728934	0.702347	0.776496
Italy_Pradis	0.728161	0.730408	0.730788	0.720659	0.723835	0.736066	0.739851	0.731579	0.739687	0.722688	0.736857	0.698567	0.713881	0.709712	0.709591	0.71108	0.716609	0.692946	0.707958	0.741011	0.742753	0.640019	0.637476	0.642059	0.64773	0.642275	0.638573	0.650315	0.643199	0.651632	0.648421	0.650092	0.652666	0.668118	0.646668	0.656681	0.65823	0	0.659246	0.667747	0.679512	0.659001	0.668896	0.665464	0.680669	0.682586	0.704603	0.692534	0.790948
Hungary_EN_HG_Koros	0.730261	0.72898	0.725434	0.727047	0.732757	0.739283	0.741483	0.742485	0.735191	0.724431	0.73771	0.708074	0.717588	0.706473	0.710333	0.707264	0.712584	0.693817	0.705742	0.738697	0.743185	0.657623	0.654067	0.653163	0.659012	0.651022	0.648632	0.659462	0.651414	0.658088	0.649341	0.675212	0.657476	0.675244	0.664811	0.669394	0.670046	0.659246	0	0.675535	0.681056	0.657487	0.6693	0.664061	0.678755	0.676967	0.689621	0.688924	0.790003
Spain_LaBraña	0.728426	0.730371	0.718801	0.730961	0.727983	0.736912	0.738357	0.73968	0.732959	0.722855	0.721899	0.67883	0.687524	0.71556	0.721388	0.716895	0.720993	0.707287	0.711648	0.740497	0.744304	0.652415	0.652893	0.655302	0.659377	0.651275	0.648767	0.668528	0.660021	0.657147	0.664749	0.656115	0.656675	0.674587	0.666567	0.664396	0.667599	0.667747	0.675535	0	0.657898	0.676536	0.679944	0.682449	0.691716	0.690267	0.706328	0.702484	0.788441
Spain_HG	0.728468	0.726292	0.723853	0.726342	0.729052	0.734849	0.738045	0.737067	0.727556	0.719479	0.712779	0.67635	0.67398	0.721532	0.722651	0.720817	0.727398	0.712192	0.717006	0.740672	0.746669	0.656915	0.652503	0.652368	0.659062	0.653266	0.650983	0.669838	0.663889	0.65632	0.671394	0.660815	0.656508	0.674618	0.667832	0.66443	0.670338	0.679512	0.681056	0.657898	0	0.683165	0.684761	0.689314	0.696853	0.696443	0.711826	0.705124	0.79116
Serbia_IronGates_Mesolithic	0.730351	0.72923	0.72325	0.726871	0.730312	0.738237	0.740249	0.739001	0.735076	0.724124	0.736672	0.70495	0.717156	0.702788	0.707589	0.705137	0.708416	0.68878	0.702506	0.736218	0.738288	0.660144	0.657599	0.657601	0.66516	0.654249	0.654464	0.657802	0.650924	0.66134	0.646631	0.663454	0.660638	0.677153	0.66613	0.667591	0.672985	0.659001	0.657487	0.676536	0.683165	0	0.667041	0.659161	0.675404	0.6775	0.696399	0.688156	0.79015
Latvia_HG	0.727901	0.73092	0.723779	0.728019	0.730578	0.740706	0.741268	0.739138	0.736001	0.726566	0.734345	0.705178	0.71223	0.696182	0.700701	0.700938	0.701886	0.686376	0.692989	0.729731	0.727765	0.664029	0.662147	0.664427	0.669897	0.660272	0.660169	0.667267	0.661798	0.667	0.660773	0.664229	0.663228	0.679716	0.668887	0.669885	0.676504	0.668896	0.6693	0.679944	0.684761	0.667041	0	0.676513	0.675996	0.679571	0.698113	0.686623	0.789091
Romania_IronGates_Mesolithic	0.735381	0.733681	0.72797	0.731643	0.735816	0.740406	0.74172	0.741054	0.73638	0.726556	0.740436	0.713037	0.725513	0.706368	0.707439	0.703718	0.711459	0.691588	0.699137	0.734494	0.739551	0.669686	0.664395	0.664861	0.673148	0.661667	0.660615	0.667395	0.655923	0.668351	0.652493	0.671804	0.672052	0.684628	0.677965	0.677269	0.684012	0.665464	0.664061	0.682449	0.689314	0.659161	0.676513	0	0.679361	0.679023	0.697853	0.689279	0.793811
Sweden_Motala_HG	0.736168	0.733376	0.728803	0.731706	0.73689	0.742524	0.742874	0.741714	0.739047	0.729482	0.736478	0.713478	0.718998	0.69345	0.695596	0.693104	0.698221	0.685745	0.683959	0.725069	0.722375	0.680251	0.678096	0.680267	0.684536	0.678414	0.675759	0.680508	0.674171	0.681576	0.671454	0.68162	0.680567	0.692893	0.68416	0.684605	0.692199	0.680669	0.678755	0.691716	0.696853	0.675404	0.675996	0.679361	0	0.665963	0.693227	0.680013	0.787964
Sweden_Mesolithic	0.734918	0.735977	0.729831	0.734995	0.738039	0.742507	0.742828	0.745001	0.741803	0.729344	0.737475	0.716998	0.720876	0.694062	0.698403	0.693075	0.702499	0.687574	0.69613	0.725101	0.724543	0.684289	0.679943	0.681986	0.686702	0.680579	0.677099	0.68155	0.677354	0.680905	0.678011	0.682041	0.684782	0.693951	0.689533	0.689434	0.692798	0.682586	0.676967	0.690267	0.696443	0.6775	0.679571	0.679023	0.665963	0	0.68438	0.67795	0.79063
Sweden_HG	0.751816	0.747198	0.744263	0.741096	0.744481	0.74883	0.75274	0.757904	0.754878	0.737505	0.74781	0.731744	0.730442	0.71296	0.70949	0.713846	0.713923	0.707171	0.708868	0.738927	0.731621	0.707237	0.692514	0.703406	0.703318	0.692203	0.696784	0.69837	0.697108	0.702583	0.693919	0.688958	0.687132	0.713984	0.698097	0.704727	0.728934	0.704603	0.689621	0.706328	0.711826	0.696399	0.698113	0.697853	0.693227	0.68438	0	0.703421	0.788294
Norway_Mesolithic	0.738481	0.739031	0.733776	0.739062	0.743017	0.743161	0.744858	0.748012	0.743729	0.736132	0.740964	0.72389	0.727746	0.688032	0.693131	0.686938	0.696041	0.686916	0.679326	0.720633	0.716859	0.694941	0.694393	0.693714	0.700794	0.692741	0.690337	0.696611	0.689722	0.69433	0.688193	0.691445	0.69508	0.706319	0.69853	0.700625	0.702347	0.692534	0.688924	0.702484	0.705124	0.688156	0.686623	0.689279	0.680013	0.67795	0.703421	0	0.789398
Romania_Oase	0.779514	0.789047	0.785784	0.79145	0.781332	0.791762	0.788168	0.780487	0.793245	0.788805	0.783475	0.78892	0.788016	0.786621	0.787878	0.79167	0.792093	0.788358	0.791659	0.786223	0.782194	0.788282	0.788589	0.791002	0.790352	0.788636	0.791708	0.786409	0.78994	0.791314	0.788738	0.78886	0.785036	0.794229	0.782252	0.794618	0.776496	0.790948	0.790003	0.788441	0.79116	0.79015	0.789091	0.793811	0.787964	0.79063	0.788294	0.789398	0
Russia_Ust_Ishim_HG	0.774322	0.772007	0.77482	0.782452	0.777472	0.773846	0.770676	0.775502	0.781938	0.775019	0.767095	0.773576	0.775223	0.779458	0.780618	0.779243	0.781115	0.777274	0.778304	0.770493	0.779206	0.775327	0.774527	0.776374	0.774237	0.777206	0.773321	0.774974	0.774983	0.77305	0.774727	0.777112	0.778003	0.782124	0.775494	0.780239	0.778046	0.776061	0.779125	0.775096	0.772708	0.776171	0.77745	0.777141	0.776216	0.775586	0.785431	0.778635	0.792497
Czech_ZlatyKun	0.781082	0.782282	0.784731	0.781109	0.781422	0.782444	0.782246	0.791463	0.787827	0.783738	0.779002	0.783626	0.78534	0.783793	0.785631	0.787142	0.783126	0.780659	0.781293	0.78235	0.788876	0.781146	0.778473	0.785866	0.783274	0.782661	0.78441	0.782874	0.780406	0.785276	0.777891	0.776309	0.78282	0.792092	0.785115	0.789029	0.787004	0.784206	0.78526	0.784178	0.783969	0.783121	0.783331	0.78403	0.782899	0.78448	0.791587	0.782735	0.790127
Georgia_Kotias	0.759768	0.76554	0.762598	0.766905	0.76627	0.761634	0.764638	0.768843	0.763949	0.758477	0.764942	0.76137	0.760333	0.744623	0.750992	0.749021	0.750753	0.747898	0.745392	0.754774	0.755607	0.755583	0.749091	0.752511	0.752278	0.750692	0.750118	0.753052	0.748219	0.750417	0.749249	0.748795	0.752544	0.76029	0.751422	0.757403	0.749177	0.748723	0.748993	0.752234	0.752986	0.747226	0.74729	0.746415	0.745936	0.745822	0.747003	0.747489	0.801969
Georgia_Satsurblia	0.766071	0.768634	0.763177	0.771604	0.769532	0.765112	0.766298	0.770075	0.768078	0.760282	0.769356	0.767059	0.766594	0.750311	0.755386	0.751985	0.753435	0.750743	0.756071	0.756187	0.75459	0.757022	0.753709	0.757324	0.758597	0.75585	0.75372	0.757453	0.753336	0.753368	0.756528	0.753706	0.759447	0.760884	0.7601	0.757993	0.760752	0.753504	0.750814	0.758512	0.759187	0.75176	0.754087	0.749701	0.750891	0.750637	0.744728	0.749191	0.802
Germany_EN_LBK_Stuttgart	0.756513	0.753771	0.751551	0.755105	0.758657	0.755689	0.759383	0.754518	0.746469	0.750445	0.756266	0.748725	0.750979	0.745975	0.751616	0.747954	0.748294	0.742741	0.745587	0.760616	0.763464	0.739182	0.738001	0.73539	0.739313	0.734901	0.734426	0.736662	0.736817	0.736335	0.729207	0.731735	0.738837	0.744905	0.734067	0.738141	0.735813	0.734156	0.729584	0.740032	0.742386	0.732725	0.736465	0.732582	0.735272	0.736108	0.735499	0.738564	0.798767
[truncated: 5 more columns]

## Sheet: Figure 4b
Figure 4b: MDS plot and genetic affinity among post-LGM Italian hunter-gatherers
COLUMN	DESCRIPTION
Pop1	First population: Le Mura 1
Pop2	Second population: Sicilian Hunter-Gatherers (Group3)
Pop3	Thrird population: populations from Group1 and Group2
Pop4	Outgroup population: Mbuti.SDG
F4	Value of f4-statistics
Z	D/standard error
BABA	counts of observed site patterns
ABBA	counts of observed site patterns
#SNP	Number of SNPs that all populations have data
Pop1	Pop2	Pop3	Pop4	F4	Z	BABA	ABBA	#SNPs
Le Mura 1	Uzzo_EM	Italy_North_Villabruna_HG	Mbuti.SDG	0,000353	0,479	25131	24917	606999
Le Mura 1	Uzzo_EM	RIP	Mbuti.SDG	0,00083	1052	14732	14439	353563
Le Mura 1	Uzzo_EM	PRD	Mbuti.SDG	-0,000853	-1095	6695	6840	170415
Le Mura 1	Uzzo_EM	Italy_Mesolithic.SG	Mbuti.SDG	0,000488	0,854	30002	29660	702137
Le Mura 1	Uzzo_EM	AC16	Mbuti.SDG	0,000303	0,391	24378	24202	580308
Le Mura 1	Italy_OrienteC	Italy_North_Villabruna_HG	Mbuti.SDG	0,001151	1366	10213	9938	238519
Le Mura 1	Italy_OrienteC	RIP	Mbuti.SDG	0,001056	1204	5889	5743	138505
Le Mura 1	Italy_OrienteC	PRD	Mbuti.SDG	0,000069	0,067	2776	2771	68580
Le Mura 1	Italy_OrienteC	Italy_Mesolithic.SG	Mbuti.SDG	0,001316	2063	11266	10927	257543
Le Mura 1	Italy_OrienteC	AC16	Mbuti.SDG	0,002436	2731	9406	8880	215939
Le Mura 1	San_Teodoro	Italy_North_Villabruna_HG	Mbuti.SDG	0,001488	2068	31417	30336	726235
Le Mura 1	San_Teodoro	RIP	Mbuti.SDG	0,003395	4655	17969	16583	408072
Le Mura 1	San_Teodoro	PRD	Mbuti.SDG	0,00147	1996	8163	7877	194292
Le Mura 1	San_Teodoro	Italy_Mesolithic.SG	Mbuti.SDG	0,002717	5,07	39645	37241	884933
Le Mura 1	San_Teodoro	AC16	Mbuti.SDG	0,002304	3134	29719	28171	671985

## Sheet: Figure 5a
Figure 5a: Population structure of the post-LGM Italian hunter-gatherers
Bottom-left dissimilarity matrix for NJ tree of Italian Epigravettian and Mesolithic individuals
#mega
#NE-Italy_GrottaPradis_(13ka)
#NE-Italy_Tagliente2_(17ka)
#NE-Italy_Villabruna_(14ka)
#NW-Italy_AreneCandide16_(13ka)
#C-Italy_Continenza_(9-12ka)
#S-Italy_Mura_(17ka)
#Sicily-Italy_Uzzo_(10ka)
#Sicily-Italy_OrienteC_(14ka)
#Sicily_Italy_SanTeodoro_(13ka)
0.643199
0.650315	0.619014
0.642275	0.610644	0.619247
0.638573	0.612689	0.623669	0.590335
0.642059	0.608307	0.617144	0.585563	0.586876
0.637476	0.612898	0.617627	0.586977	0.589736	0.573347
0.640019	0.616192	0.618518	0.597768	0.593504	0.578868	0.505139
0.64773	0.621586	0.622522	0.595358	0.597931	0.582901	0.555768	0.564318

## Sheet: Figure 5b
Figure 5b: Population structure of the post-LGM Italian hunter-gatherers
worst f-statistic used in qpGraph to model the phylogenetic relationship of the main post-LGM Italian indiviiduals (Tagliente2, AreneCandide16, Uzzo_EM) using default parameters
COLUMN	DESCRIPTION
Fit	Fitted f4 value
Obs	Observed f4 value
Diff	Difference between Fit and Obs data
SE	Standard error
Z	Z-score
Fit	Obs	Diff	SE	Z
0	0.001642	0.001642	0.000993	1.653

## Sheet: Figure S5a
Supplementary Figure 5a: misincorporation and length distribution of the molecules for mitochondrial DNA
Tables and plots are produced by mapDamage version 2.0.8
COLUMN	DESCRIPTON
pos	Nuclotide position in the read
5pC>T	Frequencies of Cytosine to Thymine mutations per position from the 5'-ends
3pG>A	Frequencies of Guanine to Adenine mutations per position from the 3'-ends
Std	Strand of reads
Length	Length of reads in base paire
Occurences	number of reads with the given length
pos	5pC>T	3pG>A			Std	Length	Occurences
1	0.151568910078723	0.154157549234136			+	30	467
2	0.00689296397450904	0.00539544676931175			+	31	557
3	0.00534876105228687	0.00364278617949001			+	32	633
4	0.00295372497538563	0.00323624595469256			+	33	740
5	0.00349576271186441	0.00365866781448402			+	34	908
6	0.00249973961045724	0.00222858962113976			+	35	905
7	0.00251598700073383	0.00242385920539572			+	36	936
8	0.00234239739280986	0.0021978021978022			+	37	882
9	0.0020259319286872	0.00196078431372549			+	38	952
10	0.0025409086289257	0.00235270049099836			+	39	915
11	0.0017001700170017	0.00215605749486653			+	40	901
12	0.002077767883645	0.00232041969330105			+	41	894
13	0.00216160576428204	0.00142479136983513			+	42	807
14	0.00178979815054191	0.00140675241157556			+	43	798
15	0.00201477501678979	0.00145377011048653			+	44	751
16	0.00199700449326011	0.00241643173580346			+	45	697
17	0.00228106714271546	0.00148485448426054			+	46	666
18	0.00239051443870721	0.00233735878457343			+	47	607
19	0.00189886068358985	0.00121777958189568			+	48	596
20	0.00270378529941919	0.00179694519317161			+	49	582
21	0.00191589232685123	0.00187432179145704			+	50	501
22	0.00100928542591845	0.00202654777586382			+	51	470
23	0.00218774860779634	0.00290610281591342			+	52	447
24	0.00147058823529412	0.00235756385068762			+	53	406
25	0.00204339787875839	0.00121077590555948			+	54	367
					+	55	363
					+	56	348
					+	57	325
					+	58	282
					+	59	274
					+	60	212
					+	61	224
					+	62	241
					+	63	177
					+	64	194
					+	65	174
					+	66	167
					+	67	156
					+	68	131
					+	69	129
					+	70	117
					+	71	101
					+	72	101
					+	73	82
					+	74	91
					+	75	82
					+	76	83
					+	77	62
					+	78	59
					+	79	58
					+	80	52
					+	81	46
					+	82	43
					+	83	43
					+	84	50
					+	85	44
					+	86	39
					+	87	36
					+	88	37
					+	89	27
					+	90	36
					+	91	22
					+	92	20
					-	30	495
					-	31	540
					-	32	665
					-	33	739
					-	34	796
					-	35	861
					-	36	899
					-	37	904
					-	38	849
					-	39	854
					-	40	863
					-	41	820
					-	42	793
					-	43	760
					-	44	752
					-	45	661
					-	46	638
					-	47	596
					-	48	562
					-	49	558
					-	50	484
					-	51	466
					-	52	439
					-	53	419
					-	54	402
					-	55	370
					-	56	316
					-	57	294
					-	58	281
					-	59	259
					-	60	236
					-	61	229
					-	62	243
					-	63	199
					-	64	187
					-	65	171
					-	66	164
					-	67	133
					-	68	153
					-	69	122
					-	70	135
					-	71	95
					-	72	98
					-	73	103
					-	74	86
					-	75	82
					-	76	74
					-	77	63
					-	78	54
					-	79	53
					-	80	53
					-	81	60
					-	82	56
					-	83	35
					-	84	41
					-	85	39
					-	86	31
					-	87	36
					-	88	42
					-	89	37
					-	90	31
					-	91	23
					-	92	28

## Sheet: Figure S5b
Supplementary Figure 5b: misincorporation and length distribution of the molecules for the nuclear genome
Tables and plots are produced by mapDamage version 2.0.8
COLUMN	DESCRIPTON
Pos	Nuclotide position in the read
5pC>T	Frequencies of Cytosine to Thymine mutations per position from the 5'-ends
3pG>A	Frequencies of Guanine to Adenine mutations per position from the 3'-ends
Std	Strand of reads
Length	Length of reads in base paire
Occurences	number of reads with the given length
pos	5pC>T	3pG>A			Std	Length	Occurences
1	0.168680146601247	0.168071887785751			+	27	109
2	0.0175331428810337	0.0173772922113192			+	28	1102
3	0.00781534356632178	0.00772207673402517			+	29	11280
4	0.00485719963592982	0.00486100220030031			+	30	1572667
5	0.00343979154445855	0.00341642526281961			+	31	1805239
6	0.00268296466300086	0.00268009017417176			+	32	2023061
7	0.00215421783908836	0.00216570707284377			+	33	2218215
8	0.00188822434931855	0.00189826000870311			+	34	2390742
9	0.00174529133639578	0.00174208689669538			+	35	2520666
10	0.00160240820466117	0.00159418586705546			+	36	2626652
11	0.00155106647163816	0.00154225592844176			+	37	2698074
12	0.00152517905130357	0.00153193621393955			+	38	2713851
13	0.00150819147711868	0.00151904041444604			+	39	2691961
14	0.0014887023936328	0.0014950399174177			+	40	2661576
15	0.00147193045803086	0.00146691689302695			+	41	2605985
16	0.00146532407660874	0.0014706395348277			+	42	2537528
17	0.00146723028897916	0.00149297852878454			+	43	2449188
18	0.00145274117780505	0.00144765889815039			+	44	2341944
19	0.00141446591068658	0.00143034585954001			+	45	2224796
20	0.00138603652361425	0.00138509431137423			+	46	2109184
21	0.00136504060352908	0.00135720402375979			+	47	1972464
22	0.00131737135189906	0.00132847305976059			+	48	1880023
23	0.00130079127466261	0.00130578313441614			+	49	1782278
24	0.00126766570209686	0.00128751774413296			+	50	1688843
25	0.00126187767885788	0.00127248198053974			+	51	1606454
					+	52	1514045
					+	53	1424863
					+	54	1341261
					+	55	1260438
					+	56	1182628
					+	57	1115583
					+	58	1045998
					+	59	982247
					+	60	918409
					+	61	861283
					+	62	810683
					+	63	756891
					+	64	712316
					+	65	667314
					+	66	623951
					+	67	585080
					+	68	549347
					+	69	513251
					+	70	482638
					+	71	451334
					+	72	422526
					+	73	396961
					+	74	371370
					+	75	349481
					+	76	326794
					+	77	306528
					+	78	287333
					+	79	270097
					+	80	253002
					+	81	236785
					+	82	222963
					+	83	206910
					+	84	194358
					+	85	182261
					+	86	171637
					+	87	161723
					+	88	150911
					+	89	139659
					+	90	131913
					+	91	123896
					+	92	115845
					+	93	2013
					+	94	213
					+	95	83
					+	96	49
					+	97	9
					-	27	89
					-	28	1105
					-	29	11276
					-	30	1571123
					-	31	1809642
					-	32	2021480
					-	33	2216048
					-	34	2387454
					-	35	2516729
					-	36	2626385
					-	37	2698533
					-	38	2708070
					-	39	2690157
					-	40	2656013
					-	41	2605723
					-	42	2537677
					-	43	2446369
					-	44	2343416
					-	45	2223450
					-	46	2108099
					-	47	1969366
					-	48	1881269
					-	49	1781076
					-	50	1689057
					-	51	1606495
					-	52	1512132
					-	53	1423479
					-	54	1340383
					-	55	1259653
					-	56	1182433
					-	57	1112525
					-	58	1046938
					-	59	980005
					-	60	918470
					-	61	862480
					-	62	809876
					-	63	756185
					-	64	711269
					-	65	665137
					-	66	625347
					-	67	585311
					-	68	549325
					-	69	512988
					-	70	480855
					-	71	450886
					-	72	421422
					-	73	396456
					-	74	371565
					-	75	348316
					-	76	326725
					-	77	306588
					-	78	287259
					-	79	268924
					-	80	253123
					-	81	236773
					-	82	221704
					-	83	206667
					-	84	193774
					-	85	183292
					-	86	171710
					-	87	161512
					-	88	151497
					-	89	140344
					-	90	132344
					-	91	124101
					-	92	116678
					-	93	2088
					-	94	188
					-	95	82
					-	96	51
					-	97	9

## Sheet: Figure S6a
Supplementary Figure 6a: Principal Component Analysis (PCA) of LGM and post-LGM hunter-gatherers
Eigenvectors for modern and ancient populations used in PCA analysis
COLUMN	DESCRIPTION
Ind	ID label
PC1	First principal component
PC2	Second principal component
PC3	Thrid principal component
PC4	Fourth principal component
PC5	Fifth principal component
PC6	Sixth principal component
PC7	Seventh principal component
PC8	Eighth principal component
PC9	Ninth principal component
PC10	Tenth principal component
Pop	Population label
Ind	PC1	PC2	PC3	PC4	PC5	PC6	PC7	PC8	PC9	PC10	Pop
Adg-185	0.0025	-0.0047	-0.0011	-0.0014	-0.0046	0.0014	0.0005	0.0006	-0.0003	-0.0001	Adygei
Adg-192	0.0018	-0.0049	-0.0005	-0.0013	-0.0048	0.0012	-0.0001	-0.0001	-0.0004	0.0001	Adygei
Adg-194	0.0018	-0.0048	-0.0002	-0.0012	-0.0031	0.0008	-0.0003	-0.0002	0.0008	-0.0003	Adygei
Adg-222	0.0011	-0.0039	-0.0004	-0.001	-0.0026	0.0005	-0.0001	-0.0002	0	-0.0002	Adygei
Adg-224	0.0021	-0.005	-0.0015	-0.0015	-0.0032	0.0012	0.0002	-0.0002	-0.0002	-0.0001	Adygei
Adg-226	0.003	-0.0054	-0.0015	-0.0017	-0.0049	0.0014	0.0002	0.0004	0	0	Adygei
Adg-227	0.0027	-0.0054	-0.0019	-0.0013	-0.0024	0.0004	-0.0003	0	0.0003	0.0002	Adygei
Adg-238	0.0018	-0.0051	-0.0011	-0.0012	-0.0051	0.0006	0.0001	-0.0001	-0.0003	0	Adygei
GEO-002	0.0038	-0.0026	-0.0028	-0.0008	-0.0003	-0.0007	-0.0002	-0.0003	0.0003	0.0013	Georgian
GEO-005	0.0035	-0.0031	-0.0015	-0.0013	-0.0006	0.0013	0.0004	0.0002	0.0001	-0.0002	Georgian
GEO-010	0.0041	-0.003	-0.0033	-0.0017	-0.0023	0.0002	0	-0.0006	0	0.0002	Georgian
GEO-015	0.004	-0.0035	-0.0017	-0.0013	-0.0001	0	0.0005	-0.0002	-0.0003	-0.0001	Georgian
GEO-020	0.004	-0.0031	-0.0032	-0.0018	-0.0025	0.0003	0.0005	-0.0005	-0.0007	-0.0002	Georgian
GEO-028	0.0035	-0.004	-0.0028	-0.0017	-0.0033	0.0006	-0.0001	-0.0004	-0.0002	-0.0001	Georgian
GEO-031	0.004	-0.0036	-0.0028	-0.0016	-0.002	0.001	0.0001	0.0005	0.0003	0.0002	Georgian
GEO-032	0.0039	-0.0035	-0.0034	-0.0014	-0.0029	0.0011	-0.0002	0.0001	0.0004	0.0001	Georgian
GEO-039	0.0038	-0.0046	-0.0027	-0.0017	-0.0042	-0.0007	0	0	0.0004	-0.0002	Georgian
GEO-051	0.0039	-0.0039	-0.0034	-0.0019	-0.0028	0.0013	0.0001	0.0003	-0.001	-0.0004	Georgian
GEO-061	0.0041	-0.0045	-0.0026	-0.0018	-0.0043	0.0003	-0.0005	-0.0001	0.0001	0	Georgian
GEO-082	0.004	-0.0046	-0.0026	-0.0019	-0.0043	-0.0003	0.0005	-0.0003	0.0003	-0.0003	Georgian
GEO001	0.0042	-0.0036	-0.003	-0.0015	-0.0024	0	0.0002	0.0003	0.0002	0.0001	Georgian
lpgh-303	0.0019	-0.0048	-0.0013	-0.0014	-0.0034	0.0013	0.0004	0.0005	0.0005	0.0001	Adygei
MOE-001	-0.0044	-0.0029	0.0046	0.0009	0.002	0.0004	-0.0003	0.0002	0.0002	0.0002	Mordovian
MOE-002	-0.0046	-0.0033	0.0047	0.001	0.0009	-0.0005	0.0001	0.0002	-0.0003	0.0002	Mordovian
MOE-010	-0.0042	-0.0033	0.0041	0.0008	0.0005	0.0015	0.0002	0.0006	-0.0003	0.0001	Mordovian
MOE-014	-0.0037	-0.0031	0.0039	0.001	0.0017	0.0007	0.0004	0	0.0003	-0.0002	Mordovian
MOE-015	-0.0044	-0.0029	0.0041	0.0006	0.0013	-0.0002	-0.0004	0	0.0001	-0.0002	Mordovian
MOE-020	-0.0041	-0.0029	0.0033	0.0009	0.0025	-0.0013	0	-0.0002	-0.0003	0.0003	Mordovian
MOE-025	-0.0041	-0.0034	0.0039	0.0006	0.0009	-0.0003	-0.0001	0.0001	0.0001	0	Mordovian
MOE-036	-0.0045	-0.0035	0.0037	0.0008	0.0012	0.0004	-0.0011	-0.0007	-0.0005	0.0001	Mordovian
MOE-043	-0.0043	-0.0034	0.0044	0.0009	0.0012	0	-0.0005	0.0002	-0.0002	0.0003	Mordovian
MOE-045	-0.0047	-0.0035	0.0048	0.001	0.0023	0.0004	-0.0001	0.0006	0.0004	0.0002	Mordovian
MOE-433	-0.0041	-0.0021	0.0034	0.0009	0.0022	0.0002	-0.0002	0	0	-0.0001	Mordovian
MOE-445	-0.0042	-0.0033	0.0047	0.0007	0.0028	-0.0005	-0.0001	-0.0005	0.0004	0	Mordovian
MOE-450	-0.0043	-0.0027	0.004	0.0007	0.0024	-0.0003	-0.0006	-0.0004	0.0006	0.0003	Mordovian
MOE-451	-0.0048	-0.0029	0.0038	0.0008	0.0039	-0.0009	-0.0001	0.0003	-0.0001	0.0003	Mordovian
MOE-452	-0.0043	-0.0029	0.0039	0.0009	0.0022	0.0007	-0.0003	0	-0.0004	-0.0001	Mordovian
MOE-455	-0.0045	-0.0029	0.0049	0.0011	0.0034	0.0002	-0.0008	0.0003	-0.0002	0.0002	Mordovian
MOE-475	-0.0046	-0.0027	0.0046	0.0007	0.0003	0.0006	0.0001	0.0001	-0.0007	-0.0002	Mordovian
MOE-485	-0.0046	-0.0028	0.0046	0.001	0.0027	0.0005	-0.0006	0.0004	-0.0004	0.0003	Mordovian
MOE-491	-0.0042	-0.003	0.0041	0.0005	0.0024	-0.0003	-0.001	0.0006	-0.0007	-0.0003	Mordovian
MOE-492	-0.0047	-0.0034	0.0044	0.0009	0.0013	0.0005	-0.0006	-0.0001	-0.0007	0.0003	Mordovian
MOE-495	-0.0045	-0.0025	0.0042	0.0011	0.0029	-0.0012	-0.0004	0.0001	-0.0005	-0.0001	Mordovian
MOE-497	-0.0044	-0.0029	0.0042	0.0008	0.0013	-0.0001	-0.0003	-0.0003	-0.0001	0.0002	Mordovian
Rbgp-200	-0.0043	-0.0016	0.0027	0.0005	0.0034	-0.0014	-0.0002	0.0003	-0.0004	0.0001	Russian
Rbgp-201	-0.0045	-0.0018	0.0035	0.0011	0.0026	-0.0001	0	-0.0003	-0.0002	-0.0002	Russian
Rbgp-203	-0.0038	-0.0016	0.0023	0.0007	0.0027	-0.001	0.0002	-0.0001	0.0001	0	Russian
Rbgp-205	-0.0046	-0.0016	0.0034	0.0005	0.002	-0.0004	0.0002	0.0008	-0.0006	0	Russian
Rkbo-12	-0.0049	-0.0019	0.004	0.0007	0.0021	-0.0015	-0.0007	0.0004	-0.0003	-0.0005	Russian
Rkbo-16	-0.0046	-0.002	0.0031	0.0003	0.0012	0.0006	0	0.0001	0.0003	0.0003	Russian
Rkbo-44	-0.0047	-0.0018	0.0031	0.0009	0.0025	-0.0005	0.0003	0.0004	0	-0.0001	Russian
Rkbo-58	-0.0049	-0.0017	0.004	0.0007	0.0023	-0.0005	-0.0004	0.0002	-0.0004	0.0002	Russian
Rksh-402	-0.0046	-0.0027	0.0037	0.0005	0.0017	0.0001	0	-0.0004	0	-0.0002	Russian
Rksh-405	-0.0043	-0.0019	0.0041	0.0013	0.0019	-0.0002	-0.0002	-0.0001	-0.0007	-0.0004	Russian
Rksh-407	-0.0043	-0.0025	0.005	0.0013	-0.002	0.0007	-0.0003	-0.0029	0.0064	-0.0118	Russian
Rksh-412	-0.0048	-0.0021	0.0036	0.0009	0.0036	-0.0003	0.0003	-0.0002	-0.0007	0.0003	Russian
Rkuch-03	-0.0044	-0.0015	0.0036	0.0009	0.0029	0.0004	-0.0007	0	-0.0001	-0.0001	Russian
Rkuch-05	-0.005	-0.002	0.0032	0.001	0.003	-0.0013	0.0001	0.0003	-0.0004	0.0004	Russian
Rkuch-53	-0.0038	-0.0018	0.003	0.0012	0.0038	-0.0001	0.0001	-0.0002	-0.0004	-0.0001	Russian
Rkuch-58	-0.0045	-0.0018	0.0031	0.0008	0.0015	-0.0007	-0.0003	-0.0005	-0.0002	0	Russian
Rorl-102	-0.0046	-0.0021	0.0042	0.0009	0.0017	-0.0004	-0.0004	0	-0.0004	0.0007	Russian
Rorl-110	-0.0044	-0.0019	0.0043	0.0008	0.0036	-0.0011	-0.0004	0	-0.0007	-0.0001	Russian
Rorl-114	-0.0042	-0.002	0.0034	0.0008	0.0023	-0.0009	-0.0002	-0.0003	-0.0007	0	Russian
Rorl-155	-0.0043	-0.0018	0.0031	0.0011	0.003	-0.0012	-0.0002	0	0.0004	0.0005	Russian
Rps-002	-0.0048	-0.0019	0.0038	0.0009	0.0029	-0.0014	-0.0005	-0.0002	0.0003	0.0002	Russian
Rps-004	-0.0054	-0.0019	0.0045	0.0009	0.0025	-0.001	0.0004	-0.0001	0.0002	0	Russian
Rps-006	-0.0055	-0.0017	0.005	0.001	0.004	-0.0004	-0.0006	-0.0004	-0.0004	-0.0001	Russian
Rps-012	-0.0052	-0.0015	0.0038	0.0007	0.0023	-0.0006	0.0001	-0.0008	-0.0003	-0.0004	Russian
Rps-090	-0.0053	-0.002	0.0048	0.0014	0.0031	-0.0001	-0.0002	0	0	0	Russian
Rps-091	-0.0046	-0.0015	0.0036	0.001	0.0041	-0.0007	0	0	0.0002	0.0005	Russian
Rps-098	-0.0049	-0.0021	0.0044	0.0009	0.0023	-0.0003	0.0003	0.0006	-0.0003	0.0003	Russian
Rrzm-08	-0.0043	-0.0019	0.0031	0.0007	0.0014	-0.001	0.0001	0.0003	0.0002	0.0006	Russian
Rrzm-10	-0.0046	-0.0021	0.0047	0.0016	0.0023	0	0.0002	-0.0002	0	-0.0006	Russian
Rrzm-13	-0.0043	-0.0025	0.0038	0.0008	0.0011	0.0007	-0.0004	0.0006	-0.0006	-0.0003	Russian
Rrzm-16	-0.0046	-0.0022	0.004	0.0013	0.0028	0.0001	-0.0005	0.0001	-0.0003	0.0002	Russian
Rrzm-83	-0.0043	-0.0023	0.003	0.0008	0.0016	-0.0011	0.0001	-0.0001	-0.0005	-0.0001	Russian
Rrzs-3	-0.0049	-0.002	0.0038	0.0008	0.0017	0.0004	-0.0005	0.0002	0.0002	0.0001	Russian
Rrzs-7	-0.0046	-0.0022	0.0038	0.0009	0.0016	-0.0013	-0.0006	-0.0003	-0.0002	-0.0003	Russian
Rrzs-11	-0.0045	-0.0021	0.0034	0.0007	0.003	0.0004	-0.0003	-0.0002	0.0004	0.0003	Russian
Rrzs-32	-0.0048	-0.002	0.0037	0.0009	0.0016	-0.0005	0.0004	0.0002	-0.0003	0	Russian
Rrzs-58	-0.0041	-0.0026	0.0036	0.0009	0.0034	-0.0004	0.0003	0	-0.0006	0.0001	Russian
Rrzs-66	-0.0045	-0.0022	0.0034	0.0006	0.0012	-0.0002	0	0.0002	0.0004	0	Russian
Rrzs-88	-0.0043	-0.0021	0.0042	0.0008	0.0012	0.001	-0.0003	0.0006	0.0003	-0.0001	Russian
Rsm-103	-0.0047	-0.0017	0.0037	0.001	0.0018	0.0003	0.0004	0.0001	-0.0005	-0.0001	Russian
Rsm-109	-0.0049	-0.0017	0.0034	0.0008	0.0024	-0.0009	0	0.0002	-0.0004	-0.0001	Russian
Rsm-166	-0.0048	-0.0017	0.003	0.0007	0.0029	-0.0006	0.0002	0.0007	-0.0006	-0.0003	Russian
Rsm-171	-0.005	-0.0021	0.0037	0.0012	0.0034	-0.0006	0.0001	0.0003	0.0003	0.0002	Russian
Rsm-176	-0.0042	-0.002	0.003	0.0008	0.0023	-0.0008	-0.0002	0.0001	-0.0002	0	Russian
Rsm-179	-0.0044	-0.0019	0.004	0.001	0.0025	-0.0006	-0.0002	0.0001	0.0001	0	Russian
Rsm-181	-0.0048	-0.0018	0.0035	0.0009	0.0018	-0.0013	-0.0006	-0.0002	-0.0003	0.0002	Russian
RYAR-173	-0.005	-0.0016	0.0041	0.001	0.0028	0.0003	-0.0006	-0.0006	0	0	Russian
RYAR-223	-0.005	-0.0022	0.0043	0.0009	0.0024	-0.0002	-0.0001	0	-0.0004	0.0005	Russian
RYAR-232	-0.0046	-0.0021	0.0036	0.0008	0.002	0.0001	-0.0004	-0.0001	0.0005	0	Russian
Shap-55	0.0024	-0.0047	-0.001	-0.0014	-0.0034	0.0011	0.0002	0.0002	0.0004	-0.0003	Adygei
Shap-156	0.0024	-0.0049	-0.0013	-0.0016	-0.0034	0.0005	0.0004	-0.0002	-0.0001	-0.0005	Adygei
Shap-225	0.0024	-0.0047	-0.0011	-0.0013	-0.0039	0.0018	0.0002	-0.0001	0.0002	-0.0001	Adygei
UKR-1283	-0.004	-0.0012	0.0024	0.0003	0.0019	-0.0003	0.0001	0	-0.0008	0.0002	Ukrainian
UKR-1291	-0.0045	-0.0014	0.0021	0.0005	0.002	-0.0007	-0.0005	0.0001	-0.0001	0	Ukrainian
UKR-1292	-0.0045	-0.0016	0.0033	0.0005	0.0007	-0.0004	0	0	-0.0004	0.0001	Ukrainian
UKR-1377	-0.0044	-0.0015	0.0028	0.0007	0.0015	-0.0009	0.0002	0.0001	0.0002	0.0001	Ukrainian
YY-2	0.0022	-0.0048	-0.0016	-0.0012	-0.0051	0.0008	-0.0007	0.0002	0.0001	0.0003	Adygei
YY-18	0.002	-0.0048	-0.0013	-0.0017	-0.0032	0.0009	0.0004	0	0.0004	0	Adygei
YY-36	0.0024	-0.0053	-0.0011	-0.0014	-0.0043	0.0012	0.0003	0	0.0005	0.0002	Adygei
HGDP00511	-0.003	0.0011	0.0001	-0.0003	-0.0011	0.0005	0.0001	0.0006	0.0007	-0.0002	French
HGDP00512	-0.0024	0.0013	-0.0007	-0.0006	-0.0017	-0.0002	0	-0.0003	0.0002	0.0001	French
HGDP00513	-0.0026	0.0012	-0.0008	-0.0002	0	0.0009	0.0001	-0.0002	-0.0002	0.0002	French
HGDP00514	-0.0029	0.001	-0.0003	-0.0002	0.0001	-0.0013	0.0006	0.0002	-0.0002	-0.0002	French
HGDP00515	-0.0033	0.0012	-0.0003	-0.0001	-0.0011	-0.0001	0.0003	-0.0004	-0.0001	0.0001	French
HGDP00516	-0.0022	0.0007	-0.0012	-0.0006	-0.0014	-0.0005	0	0.0001	-0.0001	-0.0002	French
HGDP00517	-0.0029	0.0012	-0.0004	-0.0001	-0.0005	0.0013	-0.0002	-0.0001	0.0006	0.0006	French
HGDP00518	-0.003	0.001	-0.0007	-0.0001	0.0003	-0.0001	0.0004	0.0003	0.0001	-0.0007	French
HGDP00519	-0.0035	0.0005	-0.0001	-0.0006	-0.0009	-0.001	0.0009	-0.0002	0.0002	0.0003	French
HGDP00522	-0.0026	0.0012	-0.0011	-0.0007	-0.0002	0.0001	0.0008	0.0001	0.0006	-0.0001	French
HGDP00523	-0.0035	0.0009	-0.0003	-0.0002	0.0006	-0.001	0.0003	0.0008	-0.0003	-0.0005	French
HGDP00524	-0.0025	0.002	-0.0013	-0.0006	-0.0014	-0.0001	-0.0001	0.0001	-0.0004	-0.0002	French
HGDP00525	-0.0027	0.0012	-0.0005	-0.0001	0	-0.0004	0.0003	-0.0001	0.0002	-0.0006	French
HGDP00526	-0.003	0.0009	-0.0003	-0.0004	-0.0006	0.0004	0	0.0005	-0.0003	-0.0004	French
HGDP00527	-0.0031	0.0008	-0.0001	-0.0003	-0.0007	-0.0009	-0.0001	0	0.0002	0.0001	French
HGDP00528	-0.003	0.001	0	-0.0003	-0.0005	0.0002	0.0001	-0.0003	-0.0003	-0.0002	French
HGDP00529	-0.0026	0.001	-0.0004	-0.0002	0.0002	0.0002	-0.0004	-0.0001	0.0001	0	French
HGDP00531	-0.0029	0.0029	-0.0019	-0.0004	-0.0027	-0.0002	0.0007	0.0003	0.0003	0.0001	French
HGDP00533	-0.0038	0	-0.0005	-0.0007	-0.0026	-0.0009	0.0003	0	0.0005	-0.0004	French
HGDP00534	-0.003	0.0009	0.0005	0	-0.0001	0.0001	-0.0004	0	0.0009	0.0004	French
HGDP00535	-0.0035	0.0006	-0.0001	-0.0004	-0.0019	0.0001	0.0006	-0.0002	-0.0001	0.0001	French
HGDP00536	-0.0019	0.0017	-0.0005	0	0.0013	-0.0002	-0.0003	-0.0001	-0.0001	-0.0002	French
HGDP00537	-0.0026	0.0013	-0.001	-0.0002	-0.001	0.0005	0.0001	-0.0007	-0.0001	0.0001	French
HGDP00538	-0.0026	0.0013	-0.0002	-0.0003	-0.0018	0.0008	0.0005	-0.0004	0.0005	-0.0005	French
HGDP00539	-0.0025	0.0018	-0.001	-0.0005	-0.0004	0.0002	-0.0004	-0.0002	-0.0001	0	French
HGDP00557	0.0055	0.0001	-0.0019	0.0007	0.0574	0.0042	-0.0035	-0.005	-0.0045	0.0012	Druze
HGDP00558	0.0058	0.0002	-0.0024	0.0007	0.0259	-0.0199	0.001	0.0012	0.0031	-0.0004	Druze
HGDP00559	0.005	-0.0001	-0.0018	0.0007	0.032	-0.0028	-0.0015	-0.0021	-0.0018	0.0042	Druze
HGDP00560	0.0054	-0.0007	-0.0023	0.0006	0.0396	0.0012	0	-0.0027	-0.0018	0.0027	Druze
HGDP00561	0.0053	0.0003	-0.0019	0.0009	0.027	0.0012	-0.001	-0.0023	-0.0037	0.0032	Druze
HGDP00562	0.0054	0	-0.0019	0.0007	0.0602	0.0057	-0.0037	-0.0039	-0.0093	0.0029	Druze
HGDP00563	0.0054	-0.0002	-0.0012	0.0006	0.005	-0.0016	0	0.0001	-0.0001	0	Druze
HGDP00564	0.0053	0.0001	-0.0024	0.0006	0.0429	0.0048	-0.0003	-0.0038	-0.0087	-0.0015	Druze
HGDP00565	0.0057	0.0002	-0.0029	0.0009	0.0751	0.0034	-0.0025	-0.004	-0.012	0.0029	Druze
HGDP00566	0.0054	0.0004	-0.0006	0.0001	0.0059	-0.0019	0.0004	0.0007	0	0	Druze
HGDP00567	0.006	0.0002	-0.0014	0.0006	0.0252	-0.018	0.0009	0.0015	0.0022	-0.0017	Druze
HGDP00568	0.0055	-0.0008	-0.0025	0.0001	0.0257	-0.0178	0.0007	0.002	0.0027	-0.0015	Druze
HGDP00569	0.0051	0	-0.0014	0.0003	0.0087	-0.0038	-0.0002	0.0002	0.0003	0.0002	Druze
HGDP00571	0.0047	-0.0004	-0.002	0.0001	0.0164	-0.0029	0	0	0.0002	0.0002	Druze
HGDP00572	0.0057	-0.0001	-0.002	0.0005	0.0533	0.0066	-0.0023	-0.0047	-0.003	0.0082	Druze
HGDP00573	0.0052	0	-0.0018	0.0005	0.0394	-0.0026	-0.002	-0.0026	-0.0054	0.0006	Druze
HGDP00574	0.0061	-0.0002	-0.0022	0.001	0.0256	-0.0161	0.0003	0.0023	0.0018	-0.0014	Druze
HGDP00575	0.0053	0	-0.0022	0.0005	0.043	0.0005	-0.001	-0.0028	-0.0014	0.0038	Druze
HGDP00577	0.0057	0	-0.0015	0.0008	0.018	-0.0124	0.0005	0.0024	0.0015	-0.0011	Druze
HGDP00578	0.0053	0.0007	-0.0019	0.0006	0.0185	-0.0016	0	-0.0011	-0.0009	0.0001	Druze
HGDP00579	0.005	0.0006	-0.0019	-0.0002	0.0025	-0.0011	-0.0003	-0.0006	0.0001	-0.0001	Druze
HGDP00580	0.0048	-0.0003	-0.0009	0.0006	0.0112	-0.0031	-0.0001	0	0	0	Druze
HGDP00582	0.0054	0.0002	-0.0015	0.0009	0.0187	-0.0018	-0.001	-0.001	0	0.0002	Druze
HGDP00583	0.0058	-0.0006	-0.0023	0.0005	0.0271	-0.0198	0.0006	0.0025	0.0016	-0.0015	Druze
HGDP00584	0.005	-0.0005	-0.0014	0.0005	0.008	-0.0034	0	0	0.0004	0.0003	Druze
HGDP00586	0.0052	0.0007	-0.001	0.0006	0.0127	-0.0024	0	0	-0.0001	0.0001	Druze
HGDP00587	0.0046	0.0002	-0.0016	0.0004	0.0039	-0.0024	-0.0001	0.0004	0	-0.0001	Druze
HGDP00588	0.0059	0	-0.0016	0.0007	0.0228	-0.0158	0.0008	0.0017	0.0025	-0.0009	Druze
HGDP00591	0.005	-0.0001	-0.0019	0.0008	0.0719	0.0042	-0.0055	-0.0049	-0.0094	0.006	Druze
HGDP00594	0.0055	0.0007	-0.0018	0.0009	0.0775	0.0224	-0.0087	-0.0109	-0.0176	-0.0015	Druze
HGDP00595	0.0051	-0.0004	-0.0016	0.0005	0.0237	-0.0038	0	-0.0012	-0.0002	0.0019	Druze
HGDP00597	0.0052	0.0001	-0.0012	0	0.004	-0.0024	0	0.0003	0.0003	-0.0002	Druze
HGDP00598	0.0055	0.0003	-0.0019	0.001	0.0381	0.0006	-0.0002	-0.0037	-0.0031	0.007	Druze
HGDP00599	0.0047	-0.0007	-0.0023	0.0003	0.0215	-0.0056	0.0001	-0.0003	-0.0005	0	Druze
HGDP00600	0.005	0.0002	-0.0012	0.0004	0.005	-0.0015	0.0002	0	0.0003	0.0001	Druze
HGDP00601	0.0058	-0.0003	-0.0014	0.0005	0.0241	-0.0013	-0.0015	-0.0017	-0.0011	0.0014	Druze
HGDP00602	0.0048	0.0001	-0.0017	-0.0003	0.0036	-0.0017	0.0007	0.0006	-0.0001	-0.0004	Druze
HGDP00604	0.0055	-0.0004	-0.0019	0.0004	0.0454	-0.002	-0.0021	-0.0019	-0.0031	0.0042	Druze
HGDP00606	0.0051	0.0001	-0.0018	0.0008	0.0317	0.0031	-0.0005	-0.0035	-0.0038	-0.0013	Druze
HGDP00607	0.0105	0.0064	0.0122	-0.0004	0.0035	0.0002	0.0035	-0.0071	0.0067	-0.0051	BedouinB
HGDP00608	0.0089	0.0047	0.0068	0.0001	0.0027	0.0064	0.0404	-0.077	0.0026	-0.0087	BedouinB
HGDP00609	0.0076	0.0027	0.003	0.0031	0.001	0.0032	-0.0007	-0.0024	-0.0003	0.0012	BedouinA
HGDP00610	0.0106	0.0075	0.0148	-0.0015	0.0013	0.0018	0.0014	0.0002	0.0017	0.0035	BedouinB
HGDP00611	0.0085	0.0039	0.0028	0.0043	0.0029	0.0041	-0.002	-0.0003	-0.0001	0.0009	BedouinA
HGDP00612	0.0111	0.0078	0.0161	-0.0025	-0.0001	0.0001	0.0016	-0.0011	0	0.0011	BedouinB
HGDP00613	0.007	0.0014	0.0014	0.0023	0	0.0015	-0.0007	-0.0013	-0.001	-0.0004	BedouinA
HGDP00614	0.0074	0.0017	0.0015	0.0025	0.0004	0.0015	0.0002	-0.0003	-0.0007	0.0003	BedouinA
HGDP00615	0.007	0.0017	0.0014	0.0019	0.0024	-0.0001	0.0002	-0.0009	0.0002	0.0001	BedouinA
HGDP00616	0.0103	0.0081	0.0164	-0.0023	0	0.0013	0.0006	0	0.0019	-0.0008	BedouinB
HGDP00618	0.0107	0.0075	0.0148	-0.0019	0.0012	0.0013	0.003	-0.0002	0.0003	0.0022	BedouinB
HGDP00619	0.0071	0.0022	0.0012	0.0022	0.0041	0.0011	-0.0009	-0.0007	0.0004	0	BedouinA
HGDP00620	0.0084	0.0029	0.003	0.0037	0.0027	0.0019	-0.0005	-0.001	-0.0003	-0.0013	BedouinA
HGDP00622	0.0074	0.0025	0.0029	0.0022	-0.0012	0.0012	-0.0001	0.0001	0.0009	-0.0003	BedouinA
HGDP00623	0.0109	0.0075	0.0139	-0.0012	0.0009	-0.0004	0.0833	-0.0081	-0.0573	-0.2263	BedouinB
HGDP00624	0.0103	0.0062	0.0109	-0.0009	-0.0008	-0.0043	0.0096	-0.019	-0.0141	-0.0094	BedouinB
HGDP00625	0.0069	0.0024	0.003	0.0014	0	0.0031	0.0008	-0.0004	-0.0005	0.0005	BedouinA
HGDP00626	0.007	0.0021	0.0023	0.0024	0.0005	0.002	0.0004	0.0001	0.0005	0	BedouinA
HGDP00628	0.0068	0.0018	0.0026	0.0019	0.0004	0.0027	0.0003	0.0004	0.0008	0.0007	BedouinA
HGDP00629	0.0071	0.0025	0.0024	0.0024	0.002	0.0024	-0.0002	-0.0011	0.0001	0.001	BedouinA
HGDP00630	0.0112	0.0078	0.0193	-0.0048	-0.0079	-0.0042	-0.0016	0.0001	-0.0011	0.0016	BedouinB
HGDP00631	0.011	0.0073	0.015	-0.0014	0.0006	0.0013	0.0022	0.0001	0.0037	-0.0014	BedouinB
HGDP00632	0.0083	0.0032	0.0035	0.0032	-0.0015	0.0011	-0.0012	-0.0016	0.0016	0.0011	BedouinA
HGDP00634	0.008	0.0028	0.003	0.0036	0.0001	0.0005	-0.001	-0.0007	-0.0016	0	BedouinA
HGDP00635	0.0074	0.0023	0.0022	0.0029	0.0021	0.0026	-0.0001	0.0003	-0.0007	-0.0004	BedouinA
HGDP00636	0.0098	0.0054	0.0106	-0.0012	-0.0011	-0.0026	-0.0151	0	0.0005	0.0104	BedouinB
HGDP00637	0.008	0.0024	0.003	0.0029	0.0055	0.0044	-0.001	-0.0014	0.0005	0.0024	BedouinA
HGDP00638	0.0082	0.0035	0.0028	0.0038	0.0015	0.0033	-0.0009	-0.0012	0.0004	0.0003	BedouinA
HGDP00639	0.0087	0.0049	0.0089	0.0025	-0.0216	0.2024	-0.2779	0.3977	-0.4214	0.2189	BedouinA
HGDP00640	0.0083	0.0035	0.003	0.0044	-0.0006	0.0026	-0.0011	-0.0011	0.0012	0.0002	BedouinA
HGDP00641	0.0099	0.0061	0.0124	-0.0012	0	0	0.0006	0.0011	0.0032	-0.01	BedouinB
HGDP00642	0.0074	0.0021	0.0019	0.0015	0.0012	0.0015	-0.0003	-0.0014	-0.0003	0	BedouinA
HGDP00643	0.01	0.0065	0.0124	-0.0015	-0.0001	-0.0002	0	0.0001	0.0002	0	BedouinB
HGDP00644	0.0067	0.0016	0.0016	0.0033	0.0212	0.0256	-0.1343	-0.0313	-0.0002	-0.1205	BedouinA
HGDP00645	0.0074	0.0021	0.0011	0.003	0.0013	0.0034	-0.0002	-0.0017	0.0006	0.0003	BedouinA
HGDP00646	0.0089	0.0041	0.0031	0.0044	0.0018	0.0029	-0.0015	0	0.0002	-0.0008	BedouinA
HGDP00647	0.0071	0.0022	0.002	0.0024	0.0005	0.0027	-0.0022	-0.0015	0.0007	0.0009	BedouinA
HGDP00648	0.0098	0.0061	0.0129	-0.0013	-0.0001	0	0.0012	-0.0004	0.0011	0.0001	BedouinB
HGDP00649	0.0107	0.0074	0.0164	-0.0024	-0.0008	-0.0004	-0.0004	-0.0009	-0.0141	-0.0257	BedouinB
HGDP00650	0.0095	0.0061	0.0133	-0.0019	-0.0008	-0.0006	0	-0.0028	0.0026	-0.0043	BedouinB
HGDP00651	0.01	0.0064	0.011	-0.0007	-0.0059	-0.0052	0.0598	-0.0113	-0.1963	-0.0401	BedouinB
HGDP00653	0.0102	0.0057	0.0127	-0.0012	0.0017	0.0015	-0.0001	-0.0001	-0.0041	0.0076	BedouinB
HGDP00654	0.0061	0.0005	0.002	0.0017	0.0254	0.0404	0.0459	-0.0318	-0.1008	0.1026	BedouinA
HGDP00666	-0.0002	0.0054	-0.0049	-0.0006	0.0022	-0.0003	-0.0004	0.0001	0.0001	0.0001	Sardinian
HGDP00667	-0.0008	0.005	-0.004	-0.0003	0.0034	-0.0011	-0.0003	0.0001	0.0001	0.0002	Sardinian
HGDP00668	-0.0003	0.0057	-0.0043	-0.0008	0.0017	0.0002	-0.0004	0.0001	-0.0002	0.0001	Sardinian
HGDP00669	-0.0003	0.0056	-0.0041	-0.001	0.0015	-0.0011	-0.0004	0.0003	0.0001	0.0002	Sardinian
HGDP00670	-0.0004	0.0057	-0.0047	-0.0005	0.0014	-0.001	-0.0003	0.0002	-0.0004	0.0002	Sardinian
HGDP00671	-0.0005	0.0054	-0.0046	-0.0007	0.0014	-0.0008	-0.0002	0.0003	0.0002	0.0001	Sardinian
HGDP00672	0.0001	0.0053	-0.0046	-0.0008	0.0015	0	-0.0006	0	0	-0.0002	Sardinian
HGDP00673	0.0001	0.0052	-0.0041	-0.0006	0.0011	0.0003	-0.0001	0	-0.0003	0.0001	Sardinian
HGDP00674	-0.0005	0.0057	-0.0047	-0.0007	0.0022	-0.0009	0	0	-0.0001	-0.0001	Sardinian
HGDP00675	0.0068	0.0011	0.0006	0.0044	-0.0138	-0.0036	0.0031	-0.0021	0.0004	-0.0002	Palestinian
HGDP00676	0.0064	0.0014	-0.0003	0.0025	-0.0012	0	-0.0012	0.001	0.003	-0.0007	Palestinian
HGDP00677	0.0064	0.0014	0	0.0043	-0.0105	-0.0031	0.0017	-0.0022	-0.0025	0.0011	Palestinian
HGDP00679	0.0064	0.001	0.0003	0.0037	-0.0043	0.0139	0.0005	0.0001	0.0059	-0.0532	Palestinian
HGDP00680	0.0077	0.0023	0.0033	0.0023	0.0013	0.0027	0.0004	-0.0009	0	-0.0004	Palestinian
HGDP00683	0.0072	0.0014	0.0014	0.0037	-0.0084	0.0005	0.0018	-0.0014	-0.0012	0.0007	Palestinian
HGDP00684	0.0072	0.0024	0.001	0.0046	-0.0018	0.1462	0.3138	-0.0173	-0.1934	-0.1973	Palestinian
HGDP00685	0.0076	0.0026	0.0012	0.0043	-0.0048	-0.0001	0.0014	-0.0017	-0.0003	0.0008	Palestinian
HGDP00686	0.007	0.0022	0.001	0.0029	-0.0002	0.0044	0.0012	0.003	0.0031	0	Palestinian
HGDP00687	0.0068	0.0015	0.0003	0.0032	-0.0051	0.0042	0.0018	-0.002	-0.0008	-0.0075	Palestinian
HGDP00688	0.0065	0.0011	-0.0005	0.0118	-0.1545	-0.1174	-0.3794	-0.3631	-0.1976	0.1064	Palestinian
HGDP00689	0.0063	0.0013	-0.0007	0.0029	0.0012	0.003	-0.0009	0.0018	-0.0052	-0.0052	Palestinian
HGDP00690	0.0065	0.0013	0.0003	0.0037	-0.009	-0.0016	0.0002	0.0009	0.0028	0.0011	Palestinian
HGDP00691	0.0071	0.002	0.0004	0.0085	-0.0992	-0.1744	0.3886	0.4728	0.4146	0.2824	Palestinian
HGDP00694	0.006	0.0008	0.0001	0.0025	-0.0007	0.0001	0.0011	-0.0021	0.0054	-0.0064	Palestinian
HGDP00696	0.0063	0.0007	0.0002	0.0065	-0.0223	0.0075	-0.0141	0.0055	-0.0179	-0.1251	Palestinian
HGDP00697	0.0067	0.0019	0.0016	0.0051	-0.0191	-0.0072	0.0028	-0.0017	-0.0024	0.0007	Palestinian
HGDP00698	0.0067	0.0016	-0.0001	0.003	-0.0022	0.002	-0.0004	0.0005	-0.0007	0.0005	Palestinian
HGDP00699	0.0062	0.0013	0.0001	0.002	-0.0004	-0.0001	-0.0036	-0.0058	-0.01	-0.0129	Palestinian
HGDP00700	0.0067	0.0021	0.0016	0.0027	0.0004	0.0008	-0.0004	-0.0006	0.0003	0.0002	Palestinian
HGDP00701	0.0103	0.0071	0.0153	-0.0021	0	0.0006	0.0003	0.0003	-0.0002	0.0008	BedouinB
HGDP00722	0.0065	0.001	0.001	0.0047	-0.0311	0.0339	0.0658	0.0706	0.2858	-0.0245	Palestinian
HGDP00724	0.0065	0.0015	0.0007	0.0041	-0.009	-0.0017	0.0022	-0.0018	-0.002	0.002	Palestinian
HGDP00725	0.0064	0.0013	0.0007	0.0039	-0.011	-0.0022	0.0026	-0.0003	-0.0013	0.0007	Palestinian
HGDP00726	0.0077	0.002	0.0011	0.0114	-0.0782	-0.049	0.0807	-0.1131	-0.3234	0.1856	Palestinian
HGDP00727	0.0069	0.0016	0.0005	0.0111	-0.1327	-0.1026	-0.3797	-0.362	-0.0031	0.0812	Palestinian
HGDP00729	0.0069	0.0015	0.0003	0.0059	-0.0147	0.0034	0.0742	0.0314	0.0939	0.202	Palestinian
HGDP00730	0.0066	0.0012	-0.0001	0.0062	-0.0347	-0.0194	-0.0036	0.0273	-0.2328	-0.0955	Palestinian
HGDP00731	0.0079	0.0026	0.0008	0.0055	-0.0108	-0.0047	0.003	-0.0054	-0.0055	-0.0024	Palestinian
HGDP00732	0.0068	0.0021	0.0004	0.0046	-0.0138	-0.0054	0.001	-0.0011	0.0025	0.0005	Palestinian
HGDP00733	0.0066	0.0015	0.0002	0.0049	-0.0216	0.0044	0.0123	0.0678	0.0085	-0.0099	Palestinian
HGDP00734	0.0072	0.0014	0.0007	0.0086	-0.0542	-0.0556	0.0131	-0.2106	-0.0689	-0.1905	Palestinian
HGDP00735	0.0065	0.0016	-0.0003	0.0046	-0.0247	-0.0131	-0.0174	0.083	-0.0144	-0.3295	Palestinian
HGDP00736	0.0062	0.001	-0.0003	0.0023	-0.0002	0.0008	-0.0008	0.0001	0.0022	-0.0085	Palestinian
HGDP00737	0.007	0.0018	0.0005	0.0054	-0.0175	-0.0051	0.0028	-0.0036	-0.0003	0	Palestinian
HGDP00739	0.0072	0.0017	0.0021	0.0035	-0.0053	-0.0001	-0.0008	-0.0003	-0.0004	-0.0014	Palestinian
HGDP00740	0.0061	0.0015	0.0001	0.0034	0.0062	0.012	-0.004	0.0043	0.002	-0.0071	Palestinian
HGDP00741	0.0065	0.0017	0.0002	0.0025	-0.0023	0.0024	-0.0006	0.0002	-0.0008	0.0004	Palestinian
HGDP00745	0.0065	0.0009	0.0004	0.0029	-0.0243	-0.0313	-0.2712	-0.0577	-0.1777	-0.0906	Palestinian
HGDP00794	-0.0038	0.0002	0.0001	-0.0006	-0.0027	0.0005	0	0.0001	0.0001	-0.0003	Orcadian
HGDP00796	-0.0039	0.0003	0.0008	0.0002	-0.0015	-0.0004	0.0009	0.0003	-0.0001	-0.0005	Orcadian
HGDP00797	-0.004	0.0004	0.0002	-0.0001	-0.0019	-0.0009	0.0003	-0.0001	0.0002	0	Orcadian
HGDP00798	-0.0037	0.0002	0.0001	0	-0.0018	0.0002	-0.0001	0.0001	0.0003	-0.0005	Orcadian
HGDP00799	-0.0043	0.0002	0.0008	-0.0004	-0.0026	-0.0007	0.0007	0.0004	0.0003	-0.0004	Orcadian
HGDP00800	-0.0039	0.0003	0.0002	-0.0004	-0.0002	-0.0011	0.0007	0.0003	0.0006	-0.0003	Orcadian
HGDP00802	-0.0042	0.0004	0.0008	-0.0004	-0.0009	-0.0007	0.0009	-0.0001	-0.0002	-0.0001	Orcadian
HGDP00803	-0.0038	0.0002	0.0005	-0.0005	-0.002	0.0004	0.0006	0.0001	-0.0001	-0.0004	Orcadian
HGDP00805	-0.0042	0.0002	0.0002	-0.0004	-0.0024	-0.0003	0.0006	-0.0005	-0.0002	-0.0004	Orcadian
HGDP00806	-0.0039	0.0002	0.001	-0.0004	0	-0.0005	0.001	0.0002	0.0003	-0.0003	Orcadian
HGDP00807	-0.0042	0.0001	0.0006	-0.0005	-0.0003	-0.0002	0.0006	-0.0003	0.0001	-0.0003	Orcadian
HGDP00808	-0.0041	0.0002	0.001	-0.0003	-0.0018	0.0002	0.0004	-0.0001	0.001	-0.0001	Orcadian
HGDP00810	-0.0037	0.0003	-0.0002	-0.0003	-0.0016	-0.0007	0.0004	0.0003	0.0007	-0.0006	Orcadian
HGDP00879	-0.0046	-0.0032	0.0042	0.001	0.0028	-0.0011	-0.0001	-0.0004	-0.0002	0.0002	Russian
HGDP00880	-0.0048	-0.0031	0.0041	0.001	0.0007	0	-0.0003	-0.0006	0.0002	-0.0003	Russian
HGDP00882	-0.0047	-0.0032	0.0049	0.0007	0.0003	0.0003	-0.0003	-0.0002	0.0001	0.0002	Russian
HGDP00883	-0.0051	-0.003	0.0045	0.0006	0.0009	0.0002	0.0001	0.0004	-0.0001	-0.0003	Russian
HGDP00884	-0.0046	-0.0024	0.0036	0.0009	0.0009	0.0019	-0.0006	0.0004	-0.0005	0.0001	Russian
HGDP00887	-0.0045	-0.0028	0.0044	0.0006	0.0002	0.0007	-0.0001	-0.0002	-0.0002	0.0001	Russian
HGDP00888	-0.0043	-0.0025	0.0039	0.0006	0.0033	0.0002	-0.0001	0.0001	0	0.0002	Russian
HGDP00889	-0.0047	-0.0028	0.0041	0.0009	0.0014	0.0005	-0.0003	-0.0005	0.0001	-0.0004	Russian
HGDP00890	-0.005	-0.0029	0.0036	0.0007	0.0006	-0.0001	-0.0001	-0.0004	-0.0001	0.0001	Russian
HGDP00891	-0.0045	-0.0032	0.0044	0.0009	0.0014	0.0001	0	-0.0001	0	0	Russian
HGDP00892	-0.005	-0.003	0.0043	0.0009	0.0014	-0.0005	0	0	-0.0004	0.0002	Russian
HGDP00893	-0.0048	-0.0032	0.0041	0.0007	0.0024	-0.0001	0	-0.0001	-0.0005	-0.0004	Russian
HGDP00894	-0.0044	-0.003	0.0046	0.0006	0.0005	0.0006	0	-0.0003	-0.0001	-0.0001	Russian
HGDP00895	-0.0048	-0.0029	0.004	0.0009	0.0021	0.0007	-0.0001	-0.0002	-0.0002	0.0001	Russian
HGDP00896	-0.0045	-0.0032	0.0045	0.0009	0.0024	0.0001	-0.0001	0	-0.0005	-0.0001	Russian
HGDP00897	-0.0045	-0.0032	0.0042	0.0006	0.0018	0.0001	-0.0002	0.0003	0.0005	-0.0001	Russian
HGDP00898	-0.0046	-0.0038	0.0047	0.0006	0.0024	0.0009	0	0.0001	0.0005	0.0004	Russian
HGDP00899	-0.0044	-0.003	0.0037	0.0008	0.0026	-0.0001	0	-0.0001	-0.0007	0.0002	Russian
HGDP00900	-0.0046	-0.0025	0.004	0.0009	0.0018	0.0007	-0.0006	-0.0005	0.0006	-0.0001	Russian
HGDP00901	-0.0046	-0.003	0.0046	0.0008	0.002	-0.0007	0.0002	-0.0007	-0.0003	-0.0001	Russian
HGDP00902	-0.0045	-0.0031	0.004	0.0008	0.001	0	0.0002	-0.0005	-0.0001	0	Russian
HGDP00903	-0.0048	-0.0026	0.0042	0.0009	0.0017	0.0005	-0.0005	0.0009	0.0004	-0.0003	Russian
HGDP01062	-0.0002	0.0055	-0.0048	-0.0007	0.001	0.0003	-0.0003	0.0004	-0.0006	0.0001	Sardinian
HGDP01063	-0.0002	0.0055	-0.0045	-0.0007	0.002	-0.0001	-0.0001	-0.0001	-0.0003	-0.0001	Sardinian
HGDP01064	-0.0002	0.0061	-0.0053	-0.0007	0.0016	0.0007	0.0001	0.0006	-0.001	0	Sardinian
HGDP01065	-0.0007	0.0056	-0.0046	-0.0004	0	0.0002	-0.0003	-0.0002	-0.0008	0	Sardinian
HGDP01066	-0.0003	0.0061	-0.0043	-0.0005	0.0009	0.0001	-0.0003	0.0008	-0.0002	0.0001	Sardinian
HGDP01067	0.0001	0.0055	-0.0047	-0.0006	0.0014	-0.0001	-0.0002	0.0001	-0.0002	0.0002	Sardinian
HGDP01068	0.0001	0.0053	-0.0046	-0.0007	0.0014	0.0005	-0.0006	0.0001	-0.0001	0.0002	Sardinian
HGDP01069	-0.0004	0.0058	-0.0051	-0.0011	0.0019	-0.0014	-0.0009	0.0003	-0.0001	-0.0002	Sardinian
HGDP01070	-0.0002	0.0056	-0.0047	-0.0007	0.0023	-0.0004	-0.0005	0.0003	-0.0003	0	Sardinian
HGDP01071	-0.0001	0.0052	-0.0045	-0.0005	0.0006	-0.0001	-0.0002	0.0001	-0.0001	0.0001	Sardinian
HGDP01072	0.0002	0.0053	-0.0045	-0.0006	0.0011	-0.0002	-0.0001	0.0003	0.0005	0	Sardinian
HGDP01073	-0.0002	0.0057	-0.0053	-0.0004	0.0018	-0.0007	-0.0004	0.0001	0.0001	0.0002	Sardinian
HGDP01074	-0.0003	0.0055	-0.0046	-0.0005	0.0014	-0.0003	-0.0005	0.0002	0.0001	-0.0001	Sardinian
HGDP01075	0	0.0058	-0.0048	-0.0006	0.0021	-0.0003	-0.0007	0	-0.0001	0	Sardinian
HGDP01076	-0.0001	0.0055	-0.0049	-0.0006	0.0016	-0.0005	0.0002	-0.0002	-0.0008	-0.0001	Sardinian
HGDP01077	-0.0002	0.005	-0.005	-0.0005	0.0013	-0.0005	-0.0005	-0.0003	-0.0005	-0.0001	Sardinian
HGDP01078	-0.0003	0.0051	-0.0045	-0.0006	0.0008	-0.0003	-0.0001	0	0.0002	-0.0001	Sardinian
HGDP01079	-0.0005	0.0054	-0.0046	-0.0006	0.0013	-0.0007	-0.0005	0	0	0	Sardinian
HGDP01147	-0.0014	0.0016	-0.0018	-0.0003	0.0005	-0.0009	-0.0002	0.0001	0.0005	0.0002	Italian_North
HGDP01151	-0.0015	0.002	-0.0024	-0.0006	0.0002	0.0011	0.0004	-0.0006	-0.0007	0.0002	Italian_North
HGDP01152	-0.0008	0.0017	-0.002	-0.0003	0	-0.0003	-0.0001	0.0002	0.0005	0	Italian_North
HGDP01153	-0.001	0.002	-0.0018	-0.0004	0.0009	-0.0001	0.0001	0.0002	0.0005	0.0002	Italian_North
HGDP01155	-0.0008	0.0019	-0.0019	-0.0003	0.0006	0.0009	0.0003	0	0.0004	0	Italian_North
HGDP01156	-0.0008	0.0021	-0.0023	-0.0008	-0.0011	0.001	0.0003	-0.0002	0	0.0007	Italian_North
HGDP01157	-0.0013	0.0014	-0.0022	-0.0005	0.0002	-0.0008	-0.0004	0	0.0008	0.0004	Italian_North
HGDP01161	0	0.0016	-0.0018	-0.0002	0.0009	-0.0007	-0.0008	-0.0003	0.0003	0.0002	Italian_North
HGDP01162	0.0001	0.001	-0.002	-0.0005	0	0.0012	-0.0008	0	-0.0004	0.0003	Italian_North
HGDP01163	-0.0002	0.0009	-0.0016	-0.0005	-0.0002	-0.0003	0.0004	-0.0004	0.0003	-0.0002	Italian_North
HGDP01164	-0.0001	0.0017	-0.002	-0.0005	-0.0002	-0.0004	-0.0003	-0.0001	0.0004	0.0004	Italian_North
HGDP01166	-0.0003	0.0015	-0.0021	-0.0004	0.0019	-0.0006	0	-0.0002	0	0	Italian_North
HGDP01167	0	0.0012	-0.0017	-0.0003	-0.0008	-0.0001	-0.0003	-0.0001	0.0002	0.0002	Italian_North
HGDP01168	-0.0002	0.0012	-0.0019	-0.0003	-0.0005	-0.0001	-0.0003	0.0003	-0.0004	0.0003	Italian_North
HGDP01169	0.0001	0.0013	-0.0018	-0.0007	0.0005	-0.0004	0.0003	-0.0001	-0.0002	-0.0001	Italian_North
HGDP01171	-0.0009	0.0018	-0.0018	-0.0007	0.0006	-0.0008	0	0.0002	-0.0001	-0.0001	Italian_North
HGDP01172	-0.0007	0.0012	-0.0014	-0.0006	-0.0003	0.0005	-0.0001	0	0	0.0001	Italian_North
HGDP01173	-0.0014	0.0019	-0.0021	-0.0005	-0.0011	-0.0007	-0.0001	-0.0001	0.0002	0.0004	Italian_North
HGDP01174	-0.0006	0.0021	-0.0018	-0.0003	-0.0003	-0.0008	0	-0.0002	0.0002	0.0002	Italian_North
HGDP01177	-0.0013	0.002	-0.0022	-0.0001	-0.0003	0	0.0001	0.0002	0.0006	-0.0001	Italian_North
HGDP01357	-0.003	0.0042	-0.003	-0.0012	-0.0044	-0.0001	0.0012	-0.0001	0.0005	-0.0004	Basque
HGDP01358	-0.0033	0.0043	-0.0024	-0.0012	-0.0047	0.0008	0.0007	0.0006	0.0004	-0.0003	Basque
HGDP01359	-0.0034	0.0042	-0.0029	-0.0008	-0.0051	0.0008	0.0009	0.0004	0.0006	-0.0003	Basque
HGDP01360	-0.0041	0.0046	-0.0027	-0.0012	-0.0064	0.0009	0.0015	0.0003	0.0006	-0.0002	Basque
HGDP01362	-0.0033	0.0042	-0.0027	-0.001	-0.0047	-0.0001	0.0012	0.0005	0.0007	-0.0002	Basque
HGDP01363	-0.0032	0.0041	-0.0026	-0.0012	-0.0066	0.0007	0.0011	0.0005	0.0002	-0.0003	Basque
HGDP01364	-0.0027	0.0039	-0.0027	-0.0011	-0.0041	0.0001	0.0012	0.0008	0.0008	-0.0007	Basque
HGDP01365	-0.003	0.0041	-0.0028	-0.0008	-0.0057	0.0002	0.0013	0.0006	0.001	-0.0003	Basque
HGDP01366	-0.0034	0.0041	-0.0024	-0.0011	-0.0047	0.0008	0.0011	0.0004	0.0005	-0.0005	Basque
HGDP01367	-0.0036	0.0042	-0.003	-0.001	-0.0041	0.0005	0.0009	0.0001	0.0006	-0.0003	Basque
HGDP01368	-0.003	0.0036	-0.0029	-0.001	-0.0035	0.0009	0.0011	0	0.0007	-0.0003	Basque
HGDP01370	-0.0033	0.0044	-0.0029	-0.001	-0.0041	0.0004	0.0012	0.0006	0.0008	-0.0004	Basque
HGDP01371	-0.0035	0.0038	-0.0027	-0.0013	-0.0053	0.0004	0.0009	0	0.0004	-0.0003	Basque
HGDP01373	-0.0032	0.0044	-0.0026	-0.0012	-0.0072	0.0014	0.0009	0.0002	0.0002	-0.0002	Basque
HGDP01374	-0.0034	0.0047	-0.0023	-0.0013	-0.006	0.0007	0.0004	0	0.0005	-0.0007	Basque
HGDP01375	-0.0031	0.0042	-0.0034	-0.0015	-0.0049	0.0008	0.0013	0	0.0007	-0.0001	Basque
HGDP01377	-0.0033	0.0041	-0.0032	-0.0011	-0.0057	0.0009	0.0007	0.0003	0.0004	-0.0002	Basque
HGDP01378	-0.0033	0.0039	-0.0024	-0.0011	-0.0045	0.001	0.0008	0.0006	0.001	-0.0009	Basque
HGDP01379	-0.0034	0.0044	-0.0027	-0.0013	-0.0052	0.0004	0.0008	0.0002	0	-0.0002	Basque
HGDP01380	-0.0032	0.0046	-0.0032	-0.0013	-0.0064	0.0011	0.0013	0.0003	0.0003	-0.0004	Basque
HGDP01381	0.0019	-0.0055	-0.0009	-0.0014	-0.0054	0.0002	0.0003	-0.0001	0.0003	-0.0001	Adygei
HGDP01382	0.002	-0.005	-0.0008	-0.0015	-0.0052	0.0013	0.0007	-0.0001	-0.0003	0	Adygei
HGDP01383	0.0022	-0.0047	-0.0011	-0.0017	-0.002	-0.0002	0.0002	-0.0003	0.0001	0.0005	Adygei
HGDP01385	0.0019	-0.0049	-0.0004	-0.0014	-0.0034	0	-0.0002	-0.0004	0.0001	0.0001	Adygei
HGDP01386	0.0022	-0.0047	-0.0018	-0.0013	-0.0037	0.0003	0.0003	-0.0001	-0.0002	-0.0001	Adygei
HGDP01387	0.0022	-0.0049	-0.0012	-0.0015	-0.0058	0.0009	0.0004	0.0002	0.0006	-0.0001	Adygei
HGDP01396	0.0005	-0.0042	0.0004	-0.001	-0.0024	0.0004	0.0001	0	-0.0005	0	Adygei
HGDP01397	0.0019	-0.0052	-0.0007	-0.001	-0.0041	0.001	0.0002	-0.0004	0.0003	0	Adygei
HGDP01398	0.0028	-0.0052	-0.0015	-0.0016	-0.003	0.0016	0.0002	-0.0002	0.0006	-0.0001	Adygei
HGDP01399	0.0024	-0.0049	-0.0016	-0.0015	-0.0044	0.0006	0	0	0.0003	-0.0004	Adygei
HGDP01400	0.0023	-0.0049	-0.0011	-0.0015	-0.0047	0.0014	0.0004	0.0003	0	-0.0001	Adygei
HGDP01401	0.0023	-0.005	-0.0016	-0.0014	-0.0062	0.001	0.0006	0	0.0001	0	Adygei
HGDP01402	0.0015	-0.0048	-0.0017	-0.0016	-0.0038	0.0004	0.0005	0.0001	0.0004	-0.0005	Adygei
HGDP01403	0.002	-0.0042	-0.001	-0.0015	-0.0031	0.0015	0.0006	-0.0003	0	-0.0005	Adygei
HGDP01404	0.0026	-0.0053	-0.0008	-0.0016	-0.0048	0.0019	0.0004	-0.0003	-0.0004	0	Adygei
BulgarianD6	-0.0016	-0.0002	-0.0001	0	0.0018	0.0001	-0.0001	-0.0002	-0.0003	0	Bulgarian
BulgarianA4	-0.0018	-0.0001	0.0005	0.0004	0.0017	-0.0001	-0.0009	0.0001	-0.0001	0.0001	Bulgarian
hungary3	-0.0028	-0.0002	0.0009	0.0001	0.0021	-0.0001	-0.0001	0.0001	0.0001	0	Hungarian
LithuanianF1	-0.0062	-0.0018	0.0045	0.0007	0.0014	-0.0007	0.0005	0	0	0.0002	Lithuanian
iran19	0.0041	-0.003	-0.0005	-0.0003	-0.0018	0.0011	-0.0003	-0.0009	0.0005	-0.0001	Iranian
iran14	0.0037	-0.0035	-0.0002	0.0002	-0.001	0.0008	0	-0.0002	0.0001	0.0001	Iranian
syria464	0.0069	0.0004	0.0017	0.0015	0.0012	0.0033	-0.0005	-0.0009	0.0005	0.0005	Syrian
Lebanon5	0.0075	0.0022	0.0013	0.0031	0.0028	0.0015	0.0007	-0.0015	0.0002	-0.0002	Lebanese
Jordan543	0.006	0.0014	0.0007	0.0017	0.0006	0.0085	0.0041	-0.0102	-0.0216	0.009	Jordanian
BulgarianE2	-0.0014	-0.0003	0.0004	0.0003	0.0031	-0.0008	-0.0004	0.0002	-0.0005	0.0003	Bulgarian
BulgarianB4	-0.0009	-0.0007	0	0.0002	0.0006	-0.0003	-0.0001	0	0.0005	0.0002	Bulgarian
hungary6	-0.0028	-0.0001	0.001	0.0003	0.0022	0.0004	-0.0003	-0.0003	-0.0009	-0.0001	Hungarian
lithuania3	-0.0054	-0.0017	0.0038	0.0007	0.0028	-0.0004	0	0.0005	-0.0001	-0.0003	Lithuanian
iran2	0.0039	-0.0041	-0.0003	-0.0001	-0.0005	-0.0003	0.0002	0	-0.0003	-0.0003	Iranian
iran20	0.0043	-0.0034	-0.0006	-0.0001	0.0003	0.0002	0.0003	-0.0001	-0.0001	0.0001	Iranian
syria361	0.0043	-0.0013	-0.0026	-0.0005	-0.0012	-0.0007	0.0001	-0.0002	0.0002	0.0002	Syrian
Lebanon6	0.0045	-0.0019	0.0002	0.0007	0.0006	0.0006	-0.0004	0.0003	0	0.0003	Lebanese
SaudiA5	0.009	0.0045	0.0065	0.0014	0.0437	0.073	0.01	-0.1739	0.0005	0.0579	Saudi
Jordan214	0.0056	0.0006	-0.0001	0.0014	0.0007	0.0007	0.0001	-0.0001	-0.0003	0.0008	Jordanian
BulgarianA1	-0.001	-0.0003	-0.0002	0.0002	0.0011	0.0005	-0.0002	-0.0003	0	-0.0001	Bulgarian
HungarianC5	-0.0035	-0.0011	0.0023	0.0005	0.0016	-0.0013	0.0002	0.0004	0.0003	-0.0001	Hungarian
hungary7	-0.0033	-0.0006	0.0011	0	-0.0006	0.0005	-0.0006	-0.0002	0	-0.0005	Hungarian
lithuania10	-0.0061	-0.0021	0.0042	0.0008	0.003	-0.0002	-0.0001	0.0002	0.0001	-0.0001	Lithuanian
iran3	0.0046	-0.0033	0	0	0.0014	0.0008	0.0008	-0.0004	-0.0004	-0.0003	Iranian
syria485	0.0049	0.0002	0.0001	0.001	0.0002	0.0025	0.002	0.0031	-0.0009	-0.0022	Syrian
Lebanon7	0.0049	0.0004	0.0002	0.0011	0.0043	0.0006	0	0	-0.0039	0.0074	Lebanese
SaudiA6	0.0073	0.0019	0.003	0.0012	0.0071	0.0057	-0.0061	-0.0104	-0.0047	0.0023	Saudi
Jordan445	0.006	0.0013	0	0.0026	-0.0087	0.1004	-0.19	-0.2876	0.1615	0.1749	Jordanian
BulgarianB1	-0.0012	0.0001	-0.0002	0	0.0003	-0.0016	-0.0001	0	0	0	Bulgarian
HungarianE5	-0.0031	-0.0004	0.0012	0	0.0007	-0.0004	0	0.0001	0.0001	0.0001	Hungarian
HungarianH3	-0.0034	-0.0003	0.0016	0.0005	0.0026	-0.0011	-0.0005	-0.0002	0.0006	-0.0001	Hungarian
lithuania9	-0.0058	-0.0016	0.0043	0.0009	0.0018	-0.0005	-0.0006	-0.0002	0.0002	-0.0006	Lithuanian
syria520	0.0063	0.0015	0.0016	0.0026	0.0029	-0.0001	-0.0012	0	0.0007	0.0002	Syrian
syria4	0.0054	0.0003	-0.0003	0.0007	0.0022	0.0011	0	-0.0001	-0.0003	0	Syrian
Lebanon8	0.0045	-0.0011	-0.0005	0.0003	0.001	0.0002	0.0003	-0.0004	-0.0001	0	Lebanese
SaudiA7	0.0052	0.0004	-0.0008	0.0004	0.0026	0	-0.0003	0.0002	-0.0005	0.0004	Saudi
Jordan62	0.0073	0.0015	0.0013	0.0033	-0.0003	0.0032	0.0003	-0.0002	0.0007	-0.0004	Jordanian
BulgarianC1	-0.0005	-0.0001	-0.0003	-0.0001	0.0015	-0.0001	0.0003	0.0001	0.0004	0	Bulgarian
hungary15	-0.0029	-0.0008	0.0014	0.0003	0.0011	-0.0015	0.0001	-0.0001	0.0006	0.0001	Hungarian
LithuanianA1	-0.0059	-0.0014	0.0043	0.001	0.0031	-0.0003	0.0003	0.0004	-0.0001	0.0001	Lithuanian
LithuanianE2	-0.0055	-0.0016	0.0044	0.0008	0.0032	-0.0012	0	0.0005	0.0002	0.0005	Lithuanian
iran11	0.004	-0.0038	-0.0017	-0.0008	-0.0004	0.0004	0.0002	-0.0005	0.0001	-0.0003	Iranian
syria461	0.0076	0.0006	0.0026	0.0024	0.0025	0.0024	-0.0004	-0.0001	0.0003	0.0004	Syrian
Lebanon1	0.0052	0	-0.0012	0.0003	0.0024	0.0001	0.0004	0.0003	-0.0005	-0.0005	Lebanese
saudi1434	0.0087	0.0047	0.0058	0.0009	0.056	0.0871	-0.0165	-0.1277	-0.053	0.0549	Saudi
Jordan603	0.0062	0.001	0.0009	0.0022	-0.0006	0.0003	-0.0016	-0.0006	-0.0009	0	Jordanian
BulgarianF1	-0.0013	-0.0005	0.0002	-0.0002	0.0029	-0.0004	-0.0003	0.0005	-0.0005	0.0002	Bulgarian
hungary20	-0.0034	-0.0002	0.0011	0.0003	0.0004	0	0.0004	0.0001	0.0008	-0.0005	Hungarian
lithuania1	-0.0055	-0.0014	0.0036	0.0007	0.0029	-0.0008	-0.0004	0.0002	-0.0004	-0.0001	Lithuanian
lithuania8	-0.0056	-0.0017	0.0038	0.0008	0.0026	-0.0017	0	-0.0001	-0.0003	0	Lithuanian
iran16	0.0043	-0.0038	-0.0011	-0.0003	-0.0005	-0.0005	-0.0006	0.0001	0.0002	-0.0002	Iranian
Lebanon2	0.0052	0.0001	-0.0006	0.0004	0.0013	0.0002	0.0004	0	0	0.0001	Lebanese
saudi1424	0.0088	0.004	0.0062	0.0006	0.0094	0.0084	-0.0107	-0.0073	-0.0001	0.0149	Saudi
SaudiA9	0.0068	0.0006	0.0018	0.0011	0.0041	0.0019	0.0021	-0.002	0.003	0.0048	Saudi
Jordan307	0.006	0.0019	0.0022	0.002	-0.0035	0.003	-0.0003	-0.0003	-0.0002	-0.0004	Jordanian
BulgarianH2	-0.0004	-0.0001	0	-0.0001	0.0007	-0.0004	0	-0.0002	-0.0001	0	Bulgarian
hungary2	-0.0031	-0.0007	0.0012	0.0004	0.0008	-0.0005	-0.0003	-0.0003	0	0	Hungarian
lithuania2	-0.0059	-0.0018	0.0043	0.0009	0.0034	-0.0014	0.0002	0	-0.0008	-0.0001	Lithuanian
iran17	0.0044	-0.0037	0.0001	0.0001	-0.0016	0.0012	0	0	-0.0002	0	Iranian
syria6	0.007	0.0005	0.0018	0.0022	0.0001	0.0033	0.0011	0.0005	-0.0004	-0.0005	Syrian
Lebanon3	0.0048	0.0004	-0.0005	0.0008	0.0008	0.0002	0.0002	0.0002	0	0.0002	Lebanese
Jordan503	0.0056	-0.0005	0.0004	0.0013	0	-0.0004	0.0001	-0.0003	0.0024	-0.0161	Jordanian
BulgarianF2	-0.0015	-0.0004	0.0002	0.0002	0.0006	-0.0007	-0.0008	0.0006	0.0001	0.0001	Bulgarian
HungarianD1	-0.0021	-0.0006	0.001	0.0001	0.0013	0	-0.0003	0.0004	-0.0008	0	Hungarian
LithuanianD1	-0.0054	-0.0013	0.0035	0.0009	0.0011	0	0.0003	-0.0008	-0.0002	0.0003	Lithuanian
syria7	0.007	0.0007	0.0021	0.002	0.0011	0.0023	0.0002	-0.0001	0.0008	0.0009	Syrian
Lebanon4	0.0071	0.0019	0.0008	0.0022	0.0047	0.0023	-0.0005	0.0001	-0.0008	0	Lebanese
SaudiA1	0.009	0.0042	0.0063	0.0013	0.0254	0.0438	0.0018	-0.1249	0.0302	0.067	Saudi
Jordan646	0.0063	0.0008	0.0006	0.0022	0.0127	0.0254	0.096	-0.0173	0.3218	0.202	Jordanian
Jordan384	0.0066	0.0013	0.0007	0.0022	0.0032	0.0016	-0.0006	-0.0009	-0.0001	-0.0001	Jordanian
bal102	0.0018	-0.0049	-0.0006	-0.0013	-0.0025	0.0009	0.0004	0.0004	0.0006	-0.0003	Balkar
bal64	0.002	-0.005	-0.0006	-0.0012	-0.0016	0.0014	0.0003	-0.0001	0.0003	-0.0002	Balkar
mg43	0.0035	-0.0048	-0.0029	-0.0019	-0.0036	0.0019	-0.0002	-0.0003	-0.0003	0	Georgian
ch126	0.0019	-0.0052	-0.0007	-0.0012	-0.0037	0.0007	0.001	-0.0002	0.0001	0	Chechen
abh27	0.0033	-0.0046	-0.0023	-0.0022	-0.0037	0.0013	-0.0001	0.0004	-0.0001	-0.0003	Abkhasian
armenia176	0.0042	-0.002	-0.0022	-0.0008	-0.0004	0.0002	-0.0004	-0.0001	-0.0003	0.0002	Armenian
lez38	0.0021	-0.0047	-0.0003	-0.0005	-0.0032	0	0.0003	-0.0003	-0.0002	-0.0012	Lezgin
bal124	0.0019	-0.0048	-0.0005	-0.001	-0.0045	0.0007	-0.0003	0.0006	-0.0001	-0.0004	Balkar
bal97	0.0026	-0.0052	-0.0003	-0.001	-0.0027	0.002	0.0005	-0.0005	0	0.0001	Balkar
mg47	0.0037	-0.0044	-0.0031	-0.0017	-0.004	0.0012	0.0002	-0.0002	0.0003	-0.0001	Georgian
ch16	0.002	-0.0047	-0.0003	-0.0009	-0.0027	0.0006	-0.0001	0.0001	-0.0002	0.0001	Chechen
abh107	0.0036	-0.0049	-0.0025	-0.0017	-0.0026	0.0008	0.0005	0.0001	-0.0002	0.0002	Abkhasian
abh41	0.0033	-0.0051	-0.0018	-0.0017	-0.0033	0	0	0	0	0	Abkhasian
armenia191	0.0039	-0.0025	-0.0023	-0.0009	-0.0007	0.0011	-0.0003	0.0006	-0.0005	0.0001	Armenian
lez40	0.0016	-0.0054	-0.0004	-0.0008	-0.003	0.0007	-0.0001	0.0002	0.0004	-0.0001	Lezgin
kumyks44	0.0023	-0.0047	-0.0001	-0.0008	-0.0035	0.0009	-0.0002	-0.0001	-0.0001	0.0001	Kumyk
bal136	0.0019	-0.0048	-0.0003	-0.0014	-0.0036	0.0011	-0.0001	-0.0003	0.0003	-0.0002	Balkar
mg22	0.0036	-0.0042	-0.0029	-0.0018	-0.0024	0.0002	0.0004	-0.0002	0.0003	-0.0003	Georgian
mg49	0.004	-0.0043	-0.0031	-0.0017	-0.0043	0.0007	0.0005	-0.0002	-0.0003	0.0001	Georgian
ch174	0.0014	-0.0046	-0.0008	-0.0013	-0.0041	0	0.0005	-0.0001	0.0002	-0.0001	Chechen
abh119	0.0036	-0.0047	-0.0026	-0.0018	-0.0048	0.0003	0.0004	0.0003	0.0005	-0.0002	Abkhasian
armenia86	0.0038	-0.0023	-0.0021	-0.0006	-0.0003	-0.001	0.0002	0.0002	0.0003	0.0005	Armenian
armenia279	0.0049	-0.0019	-0.0022	-0.0004	0.0005	-0.0017	0.0005	0.0006	-0.0005	0.0002	Armenian
bal22	0.0021	-0.0049	-0.0011	-0.0014	-0.0039	0.0004	-0.0003	0.0002	-0.0002	0	Balkar
mg23	0.0038	-0.0042	-0.0024	-0.0021	-0.0021	0.0006	-0.0003	0.0002	0	-0.0003	Georgian
mg62	0.0041	-0.0044	-0.0031	-0.0019	-0.0018	0.0009	0	-0.0008	-0.0003	-0.0001	Georgian
ch179	0.002	-0.0048	-0.0006	-0.001	-0.0039	-0.0002	0.0002	-0.0001	0	0	Chechen
abh122	0.0033	-0.0043	-0.0021	-0.0017	-0.0041	0.0017	0.0003	0.0001	-0.0001	0.0001	Abkhasian
armenia91	0.0047	-0.0019	-0.002	-0.0008	0.0005	-0.0002	-0.0003	0.0002	-0.0001	-0.0001	Armenian
armenia293	0.0042	-0.0028	-0.0023	-0.0006	-0.001	-0.0003	-0.0003	0.0001	0	0.0002	Armenian
lez49	0.0016	-0.0046	-0.0001	-0.001	-0.0039	0.0002	-0.0003	-0.0001	-0.0001	-0.0003	Lezgin
kumyks93	0.002	-0.0048	-0.0007	-0.001	-0.0016	-0.0011	0.0005	0	0.0003	0.0002	Kumyk
bal41	0.002	-0.0051	-0.0009	-0.0011	-0.0043	0.0005	0.0004	-0.0004	0.0001	-0.0004	Balkar
mg27	0.0042	-0.0044	-0.0028	-0.002	-0.003	0	-0.0003	0.0002	-0.0001	0.0002	Georgian
ch193	0.0023	-0.0051	-0.0004	-0.0009	-0.0018	-0.0004	-0.0002	0	0.0002	-0.0001	Chechen
abh133	0.0036	-0.0054	-0.0027	-0.002	-0.0045	0.0009	0.0007	-0.0002	-0.0001	-0.0001	Abkhasian
armenia102	0.0037	-0.0024	-0.0022	-0.0005	-0.0008	0.0003	-0.0001	-0.0001	0.0001	-0.0002	Armenian
lez31	0.0016	-0.0049	-0.0001	-0.0009	-0.0033	0.0006	0.0005	0.0001	0.0003	0	Lezgin
lez7	0.0019	-0.0047	-0.0004	-0.0007	-0.0014	0.0017	0.0001	-0.0002	0.0006	-0.0002	Lezgin
kumyks98	0.002	-0.0046	-0.0003	-0.0008	-0.003	0.0004	-0.0003	0.0002	0	-0.0004	Kumyk
bal42	0.0019	-0.0048	-0.0012	-0.0009	-0.0031	0.001	0.0003	0.0003	0	0	Balkar
mg31	0.0036	-0.004	-0.0029	-0.0018	-0.0038	-0.0002	0.0003	0.0002	0.0002	-0.0003	Georgian
ch21	0.0016	-0.0052	-0.0009	-0.0013	-0.0046	0.0007	0.0001	-0.0003	-0.0002	-0.0002	Chechen
abh147	0.0035	-0.0049	-0.0025	-0.0018	-0.003	-0.0004	0.0003	-0.0002	-0.0005	-0.0002	Abkhasian
armenia106	0.004	-0.0027	-0.0023	-0.0007	0.0013	-0.0006	-0.0004	-0.0002	-0.0002	-0.0001	Armenian
lez33	0.0014	-0.0048	-0.0002	-0.0009	-0.0027	0.0013	0.0001	0.0005	-0.0003	-0.0001	Lezgin
lez9	0.0014	-0.0046	-0.0004	-0.0008	-0.0026	0.0003	0.0003	-0.0009	-0.0001	0.0006	Lezgin
kumyks90	0.0012	-0.0047	-0.001	-0.0006	-0.003	0.0007	-0.0004	-0.0001	0	-0.0005	Kumyk
bal45	0.0021	-0.0052	-0.0012	-0.0013	-0.0042	0.0005	0.0001	-0.0007	0.0004	0.0002	Balkar
mg34	0.0037	-0.0044	-0.003	-0.0019	-0.005	-0.0007	0.0002	-0.0002	0.0001	-0.0001	Georgian
ch3	0.0019	-0.0045	-0.0002	-0.0007	-0.0045	0.0007	0.0002	-0.0003	-0.0003	0.0001	Chechen
abh154	0.0039	-0.0044	-0.0025	-0.0016	-0.0034	0.0007	0.0001	-0.0002	-0.0001	-0.0001	Abkhasian
armenia139	0.0046	-0.0015	-0.0021	-0.0004	0.0014	-0.0001	-0.0003	-0.0007	0.0003	0	Armenian
lez36	0.002	-0.0048	0.0001	-0.0008	-0.0043	0.0016	0.0004	0	0.0001	-0.0004	Lezgin
kumyks40	0.0026	-0.0033	-0.0017	-0.001	-0.0037	0.0005	0.0001	0.0004	0.0001	0	Kumyk
kumyks94	0.0022	-0.0048	-0.0001	-0.0005	-0.0013	0.0012	-0.0003	0.0002	-0.0006	-0.0006	Kumyk
bal50	0.0018	-0.0045	-0.0008	-0.0014	-0.0043	0.0008	-0.0002	0.0001	0	-0.0001	Balkar
mg40	0.0039	-0.0046	-0.0029	-0.0017	-0.0053	0.0001	0.0005	-0.0001	-0.0004	-0.0001	Georgian
ch113	0.0019	-0.0051	-0.0008	-0.0011	-0.0044	0.0009	0	-0.0002	-0.0003	-0.0001	Chechen
ch31	0.0016	-0.0044	-0.0007	-0.0015	-0.0033	0.0008	0.0001	-0.0001	-0.0001	0.0001	Chechen
abh24	0.0041	-0.0041	-0.0024	-0.0011	-0.002	0.0004	-0.0005	0	0	0	Abkhasian
armenia162	0.0044	-0.0022	-0.0024	-0.0009	-0.0019	0.0002	-0.0004	0.0002	-0.0003	-0.0001	Armenian
lez37	0.0019	-0.0051	-0.0006	-0.0008	-0.0029	0.0011	0.0002	-0.0002	-0.0002	-0.0004	Lezgin
kumyks41	0.0016	-0.0047	-0.0004	-0.0009	-0.004	0.0011	-0.0005	-0.0001	0	-0.0002	Kumyk
kumyks97	0.0015	-0.0041	-0.0004	-0.0007	-0.0022	0.0006	0	0.0001	-0.0007	0	Kumyk
bel43s	-0.0049	-0.0018	0.0036	0.0008	0.003	-0.0003	-0.0001	-0.0004	-0.0001	0.0002	Belarusian
UkrBel618	-0.0046	-0.0018	0.003	0.0005	0.0003	0.0004	0.0003	0.0002	-0.0007	0.0001	Ukrainian
UkrLv240	-0.0032	-0.0013	0.0019	0.0004	-0.0001	-0.0001	0	-0.0002	0.0001	0	Ukrainian
Est393	-0.0057	-0.0018	0.0038	0.0006	0.0035	-0.0011	-0.0002	-0.0003	0.0002	-0.0002	Estonian
Mordovians27	-0.0043	-0.0032	0.0038	0.0007	0.0007	0.0004	0.0003	0	-0.0006	0.0001	Mordovian
bel30s	-0.0048	-0.0013	0.0036	0.0008	0.0032	0	0.0004	0.0005	0.0001	0.0001	Belarusian
UkrBel620	-0.0042	-0.0013	0.0027	0.0007	0.0019	-0.0006	-0.0007	0.0001	-0.0004	0.0003	Ukrainian
Est375	-0.0057	-0.0019	0.0036	0.001	0.0019	0	0	0.0002	-0.0002	0.0001	Estonian
Est380	-0.0058	-0.0017	0.0038	0.001	0.0021	-0.0006	-0.0001	0.0003	-0.0002	0.0003	Estonian
Mordovians28	-0.0045	-0.0029	0.0039	0.0007	0.0002	-0.0001	-0.0004	0.0002	0.0001	0	Mordovian
bel72c	-0.0043	-0.0017	0.0033	0.0007	0.0014	-0.0005	0	-0.0002	0.0001	-0.0005	Belarusian
UkrBel622	-0.004	-0.0019	0.003	0.0006	0.0014	0.0002	0.0005	0.0001	-0.0002	0.0003	Ukrainian
Est391	-0.006	-0.002	0.0042	0.0008	0.0013	0.0001	-0.0002	0.0003	-0.0001	-0.0003	Estonian
Est377	-0.0059	-0.0021	0.0049	0.0009	0.0034	-0.0002	-0.0005	0	-0.0002	-0.0002	Estonian
Mordovians30	-0.004	-0.0037	0.0039	0.0007	0.0007	0.0002	-0.0002	0.0001	-0.0003	0.0005	Mordovian
bel93c	-0.005	-0.0017	0.0035	0.0008	0.0013	-0.0001	-0.0003	-0.0003	0.0004	0	Belarusian
UkrBel733	-0.0044	-0.0016	0.0034	0.0003	0.0014	0.0003	-0.0007	0.0006	-0.0004	0	Ukrainian
Est372	-0.0058	-0.0019	0.004	0.001	0.0012	-0.001	-0.0001	0.0004	-0.0003	0.0001	Estonian
Mordovians4	-0.0043	-0.0027	0.0046	0.0011	0.0025	-0.0001	-0.0005	-0.0002	0	0	Mordovian
Mordovians31	-0.0043	-0.0031	0.0038	0.0006	0.0015	-0.0003	-0.0002	0.0001	0.0005	-0.0002	Mordovian
bel110c	-0.0046	-0.0019	0.0037	0.0012	0.0018	0.0001	-0.0001	0.0002	0.0005	0.0002	Belarusian
UkrBel736	-0.004	-0.0022	0.0034	0.0009	0.0021	-0.0014	-0.0003	-0.0004	0.0004	0.0003	Ukrainian
Est358	-0.0056	-0.0016	0.0037	0.0005	0.0028	-0.0006	0.0004	-0.0006	0.0001	-0.0003	Estonian
Mordovians17	-0.0044	-0.0029	0.0042	0.001	0.0008	-0.0006	0.0004	-0.0002	0.0001	0.0001	Mordovian
Mordovians1	-0.0041	-0.0032	0.0037	0.0003	0.0013	0.0001	0	-0.0001	0.0004	0	Mordovian
bel8s	-0.0041	-0.0016	0.0035	0.0008	0.0018	-0.0005	0	-0.0002	-0.0004	-0.0001	Belarusian
belarusian23vp	-0.0044	-0.0021	0.0033	0.0005	0.0009	-0.0016	-0.0005	0.0002	-0.0001	-0.0002	Belarusian
Est400	-0.005	-0.0019	0.0035	0.0011	0.0028	-0.0015	-0.0001	-0.0004	0.0004	0.0001	Estonian
Mordovians22	-0.0044	-0.0032	0.0045	0.0009	0.0008	-0.0003	-0.0006	0.0004	-0.0003	0.0001	Mordovian
bel23s	-0.0053	-0.0017	0.0035	0.0009	0.0042	-0.0007	-0.0002	-0.0004	-0.0001	-0.0001	Belarusian
belarusian47zp	-0.0048	-0.0015	0.0027	0.0007	0.0015	-0.0006	-0.0001	-0.0002	0.0006	0	Belarusian
UkrLv228	-0.0038	-0.0015	0.0029	0.0005	0.0029	-0.0002	-0.0005	0.0005	0	-0.0001	Ukrainian
Est397	-0.0052	-0.0016	0.0039	0.0008	0.0011	-0.0007	-0.0002	0.0004	-0.0002	0.0003	Estonian
Mordovians32	-0.0045	-0.0033	0.0041	0.0007	0	0.0002	-0.0002	0.0005	-0.0003	0.0001	Mordovian
bel82s	-0.0047	-0.0015	0.0032	0.0008	0.003	-0.0006	-0.0009	-0.0001	-0.0005	0	Belarusian
UkrBel614	-0.0045	-0.0024	0.0038	0.0007	-0.001	-0.0006	0.0002	0.0004	-0.0003	0.0002	Ukrainian
UkrLv237	-0.0039	-0.0011	0.0025	0.0005	0.0036	-0.0011	-0.0003	0.0001	-0.0001	0.0004	Ukrainian
Est394	-0.0054	-0.0018	0.0044	0.0012	0.003	-0.0005	0.0003	0.0008	0.0004	0.0004	Estonian
Mordovians5	-0.0047	-0.0028	0.0043	0.0008	0.0024	-0.0002	-0.0005	0	-0.0007	0.0003	Mordovian
saudi1403	0.009	0.0043	0.0064	0.0009	0.0359	0.0489	-0.0205	-0.0414	-0.0181	0.03	Saudi
NA15202	-0.0036	0	0.0016	0.0001	0.002	0.0007	-0.0003	0.0002	-0.0005	-0.0002	Hungarian
NA15725	-0.0039	-0.0003	0.0018	0.0004	0.0015	-0.0004	0.0001	-0.0003	-0.0002	-0.0002	Czech
NA15733	-0.0038	-0.0013	0.002	0.0007	0.003	-0.0006	-0.0004	0.0004	0.0003	0.0001	Czech
NA15762	-0.0044	-0.0002	0.0008	-0.0006	-0.0017	-0.001	0.0002	0.0003	-0.0002	-0.0002	Icelandic
NA17373	0.0001	0.0007	-0.001	-0.0006	0.0018	-0.0004	0	-0.0002	0.0008	0.0001	Greek
NA15203	-0.0035	-0.0004	0.0009	0.0001	0.0002	-0.0009	0.0003	0.0003	0.0002	-0.0001	Hungarian
NA15726	-0.0036	-0.0005	0.0012	0.0001	0.002	0.0001	0.0001	0.0009	0.0005	0.0002	Czech
NA15755	-0.0049	0.0004	0.0009	-0.0002	-0.0006	-0.002	0.0008	-0.0004	-0.0001	0.0004	Icelandic
NA15763	-0.0043	-0.0001	0.0006	-0.0005	-0.0021	0.0002	0	0.0001	-0.0001	0.0001	Icelandic
NA17374	0.0039	-0.0016	-0.0029	-0.0009	-0.0006	0.0003	-0.0001	0.0001	-0.0006	0.0002	Greek
NA15204	-0.0028	-0.0008	0.0013	0.0004	0.0011	-0.0002	-0.0005	0.0005	0.0004	-0.0002	Hungarian
NA15727	-0.0039	-0.0003	0.0018	0.0002	0.0019	-0.0006	-0.0002	0.0002	0	0.0003	Czech
NA15756	-0.0043	0.0002	0.0011	-0.0003	-0.0002	0.0003	0.0008	-0.0003	-0.0001	-0.0003	Icelandic
NA15764	-0.0038	0.0001	0.0008	-0.0004	-0.0018	-0.0008	0.0005	0.0004	0.0001	0	Icelandic
NA17375	0.0014	-0.0001	-0.0012	-0.0001	0.0034	-0.0001	0.0002	0.0001	0	0.0001	Greek
NA15205	-0.0035	-0.0004	0.0015	0.0001	0.0022	-0.0007	0.0006	0	-0.001	-0.0002	Hungarian
NA15728	-0.0036	-0.0004	0.0017	0.0001	0.0012	-0.0017	-0.0001	-0.0003	-0.0004	-0.0001	Czech
NA15757	-0.004	0.0001	0.0006	-0.0001	-0.0005	-0.0005	0	0.0002	-0.0002	-0.0003	Icelandic
NA15765	-0.0046	0.0001	0.0014	0	-0.0006	-0.0006	0	-0.0003	0.0002	0.0001	Icelandic
NA17376	0.0028	-0.0001	-0.0018	-0.0004	0.0026	-0.0004	-0.0002	-0.0001	0.0002	0.0003	Greek
NA13626	0.0021	-0.0053	-0.0006	-0.0012	-0.0037	0.0014	0	0.0002	-0.0001	0.0001	Adygei
NA15206	-0.003	0	0.0005	0	-0.0002	-0.0006	0.0004	0.0001	0.0007	0.0001	Hungarian
NA15729	-0.0036	-0.0005	0.0015	0.0001	0.0008	0.0001	0.0005	0.0001	0	-0.0001	Czech
NA15758	-0.0041	-0.0003	0.0013	-0.0004	-0.0023	-0.0001	0.0008	0.0002	-0.0002	0.0002	Icelandic
NA15766	-0.0043	0	0.0008	-0.0005	-0.0025	-0.0001	0.0008	0.0001	-0.0002	0.0001	Icelandic
NA17377	-0.0002	-0.0001	-0.0005	-0.0003	0.0009	0.0002	0.0003	-0.0007	-0.0004	0.0003	Greek
NA15199	-0.0033	-0.0002	0.0009	0.0001	0.0008	-0.0005	-0.0008	-0.0001	-0.0005	0.0001	Hungarian
NA15207	-0.003	-0.001	0.0015	0.0004	0.0011	-0.0006	0.0001	0.0004	0.0003	0	Hungarian
NA15730	-0.0034	-0.0002	0.0014	-0.0001	0.0013	-0.0013	0.0003	-0.0002	0.0002	0.0002	Czech
NA15759	-0.0045	0	0.0009	-0.0002	-0.0003	-0.0006	0.0006	0.0004	-0.0005	0.0001	Icelandic
NA15200	-0.0035	-0.0005	0.0019	0.0006	0.0011	-0.0011	0.0004	0	-0.0003	0.0001	Hungarian
NA15208	-0.0033	0	0.0012	0.0005	0.0004	-0.0013	0	0.0001	-0.0003	-0.0001	Hungarian
NA15731	-0.004	-0.0005	0.0015	0.0002	-0.0002	-0.0004	-0.0003	0.0004	0.0006	-0.0001	Czech
NA15760	-0.0045	-0.0003	0.0012	0.0001	-0.0009	-0.0008	0.0006	0.0003	0.0001	0.0001	Icelandic
NA15201	-0.0031	-0.0005	0.0008	0.0003	0.0019	-0.0002	-0.0002	0.0004	0.0001	-0.0003	Hungarian
NA15724	-0.004	-0.0007	0.0016	0.0003	-0.0022	-0.0005	-0.0004	0.0002	-0.0004	-0.0003	Czech
NA15732	-0.0041	-0.001	0.0019	0.0003	0.0024	0.0002	0.0005	-0.0006	-0.0002	0.0004	Czech
NA15761	-0.0046	-0.0003	0.0015	-0.0001	-0.0013	-0.0011	0.0005	-0.0002	-0.0002	-0.0003	Icelandic
NA17372	0.0009	0.0001	-0.0007	0	0	-0.0005	-0.0001	0.0005	0	-0.0001	Greek
HG00103	-0.0041	0.0003	0.0006	0	-0.0001	0	0.0007	-0.0002	0.0006	-0.0001	Scottish
HG00104	-0.0036	-0.0001	0.0002	-0.0004	-0.0021	-0.0007	0.0006	-0.0001	0.0003	-0.0001	Scottish
HG00105	-0.0041	0.0006	0.0007	-0.0004	-0.0001	-0.0004	0.0001	-0.0001	-0.0001	-0.0002	Scottish
HG00106	-0.0041	0	0.0005	-0.0004	-0.002	-0.0006	0.0006	-0.0005	0.0008	0.0001	Scottish
HG00128	-0.0036	0.0007	0	-0.0004	-0.0007	0	-0.0002	-0.0004	-0.0002	0.0002	English
HG00129	-0.0038	0.0007	0.0004	-0.0005	-0.0015	0.0002	0.0006	-0.0006	0	-0.0003	English
HG00130	-0.0034	0.0006	-0.0001	-0.0001	-0.0021	0.0008	-0.0002	0.0006	-0.0006	0.0003	English
HG00131	-0.0034	0.0006	0	-0.0002	0	-0.0005	-0.0002	0.0002	0	-0.0003	English
HG00233	-0.0037	0.0012	-0.0001	-0.0002	0.0007	0	-0.0002	0.0006	0	0.0001	English
HG00234	-0.0037	0.0004	0	-0.0004	-0.0023	-0.0003	0.0007	0.0001	-0.0002	-0.0003	English
HG00232	-0.0036	0.0006	-0.0001	-0.0001	-0.0004	0.0003	0.0004	0.0001	0.0008	0.0001	English
HG01500	-0.0011	0.0027	-0.0014	0.0001	-0.0027	0.0004	-0.0003	0	0.0002	-0.0001	Spanish
HG01501	-0.0012	0.0027	-0.0009	0	-0.0008	0.0013	-0.0002	-0.0002	0.0001	-0.0002	Spanish
HG01503	-0.0017	0.0027	-0.002	-0.0004	-0.0026	0.0007	-0.0002	-0.0002	0.0007	-0.0001	Spanish
HG01504	-0.0012	0.0035	-0.0017	-0.0003	-0.001	0.0006	0.0001	-0.0001	-0.0002	-0.0006	Spanish
HG01506	-0.0015	0.0028	-0.0013	-0.0002	-0.0018	-0.0002	0.0002	-0.0001	0.0006	0	Spanish
HG01507	-0.0018	0.0027	-0.0015	0	-0.0013	-0.0005	-0.0002	-0.0001	0.0002	0.0002	Spanish
HG01509	-0.0008	0.0031	-0.0008	-0.0002	-0.0002	0	0.0007	0.0006	0.0007	-0.0001	Spanish
HG01510	-0.0016	0.0026	-0.0009	-0.0003	0.0001	-0.0005	-0.0006	0	0.0003	-0.0002	Spanish
HG01512	-0.0024	0.003	-0.0017	-0.0007	-0.0008	0.001	0	0.0002	0.0007	-0.0003	Spanish
HG01513	-0.0023	0.0031	-0.0018	-0.0003	-0.0007	-0.0003	0.0002	-0.0009	0.0006	0	Spanish
HG01515	-0.0029	0.0034	-0.0014	-0.0006	-0.0026	0.0005	-0.0001	0.0004	-0.0003	-0.0002	Spanish_North
HG01516	-0.0032	0.0038	-0.0023	-0.0006	-0.0036	0.0004	0.0006	0.0005	0.0013	-0.0008	Spanish_North
HG01518	-0.0031	0.0034	-0.0021	-0.0007	-0.0028	-0.0003	0.0007	0.0003	0.0001	-0.0004	Spanish_North
HG01524	-0.0013	0.0029	-0.0012	-0.0002	-0.0012	0.0006	-0.0001	-0.0006	-0.0006	0.0002	Spanish
HG01527	-0.0008	0.0029	-0.001	0.0004	-0.002	-0.0003	0.0002	0.0001	-0.0004	0	Spanish
HG01528	-0.0014	0.0031	-0.0017	0.0002	-0.0009	0.0011	-0.0001	-0.0004	-0.0004	-0.0001	Spanish
HG01530	-0.0016	0.0027	-0.0014	0	-0.0006	0.0002	-0.0002	0	-0.0002	-0.0001	Spanish
HG01536	-0.0022	0.0025	-0.0011	-0.0002	-0.0012	0.0004	0.0003	-0.0001	0.0001	0	Spanish
HG01537	-0.0019	0.0022	-0.0019	-0.0002	-0.0017	-0.0005	0.0002	0.0002	-0.0003	-0.0005	Spanish
HG01605	-0.0018	0.0028	-0.0022	-0.0006	-0.001	0.0015	0.0005	-0.0003	0.0002	-0.0001	Spanish
HG01606	-0.0021	0.0028	-0.0015	-0.0002	-0.0023	0.0015	-0.0002	-0.0004	0.0001	0.0004	Spanish
HG01607	-0.0012	0.0026	-0.0019	-0.0001	-0.0012	-0.0008	0.0001	-0.0003	-0.0001	0.0003	Spanish
HG01608	-0.0017	0.0027	-0.0016	-0.0001	-0.0013	0.0006	0	0.0003	0.0009	-0.0004	Spanish
HG01613	-0.0017	0.0023	-0.0018	-0.0003	-0.0015	0.0001	0.0002	0.0008	0.0002	-0.0004	Spanish
HG01615	-0.0018	0.0023	-0.0017	-0.0002	-0.0013	0.0008	0.0004	0.0003	-0.0001	-0.0001	Spanish
HG01617	-0.0014	0.0027	-0.0017	-0.0003	-0.0008	0.0006	-0.0004	0.0005	0.0002	-0.0001	Spanish
HG01618	-0.0015	0.0025	-0.0016	-0.0004	-0.0024	-0.0008	-0.0003	-0.0001	0.0003	-0.0007	Spanish
HG01619	-0.0012	0.0029	-0.0016	-0.0001	-0.0009	0.0005	-0.0001	0.0003	0.0002	0.0001	Spanish
HG01620	-0.0012	0.0026	-0.0016	-0.0002	-0.0011	0.0007	0.0001	-0.0003	0.0007	-0.0002	Spanish
HG01623	-0.0012	0.0031	-0.0018	-0.0001	-0.0005	0.0009	0.0004	-0.0009	-0.0004	0.0003	Spanish
HG01624	-0.0011	0.0033	-0.0015	-0.0002	-0.0023	0.0013	-0.0003	0.0003	-0.0002	0	Spanish
HG01625	-0.0016	0.0023	-0.0014	-0.0003	-0.0027	0.0004	0.0006	0.0001	-0.0006	0.0003	Spanish
HG01626	-0.0002	0.0022	-0.0023	-0.0001	0.0004	0.0004	-0.0002	0	0.0001	0	Spanish
HG00171	-0.0059	-0.0029	0.0046	0.0011	0.0016	0.0001	0.0003	0.0001	0.0001	-0.0002	Finnish
HG00174	-0.0048	-0.0014	0.0033	0.0004	0.0003	0.0006	-0.0006	0	0.0004	-0.0005	Finnish
HG00190	-0.005	-0.0016	0.0035	0.0008	0.0024	-0.0001	0	0.0005	-0.0003	0.0002	Finnish
HG00266	-0.0051	-0.0021	0.0039	0.0009	0.0028	0.0004	0.0002	-0.0001	-0.0001	0.0003	Finnish
HG00231	-0.0034	0.0001	-0.0002	-0.0004	0.0006	0	0.0001	0	-0.0001	0.0001	English
HG00183	-0.0048	-0.0028	0.0038	0.0009	0.0018	0.0001	0	0.0003	-0.0003	-0.0001	Finnish
HG00126	-0.0039	0.0006	-0.0002	-0.0002	-0.0017	-0.0004	0.0004	0.0003	-0.0003	-0.0007	English
HG00173	-0.0055	-0.0024	0.0043	0.0005	0.0019	0.0001	-0.0002	-0.0004	0.0001	0.0002	Finnish
HG00181	-0.0034	-0.0014	0.0031	0.0007	0.0012	0	0.0001	0.0001	-0.0003	-0.0001	Finnish
HG00182	-0.0052	-0.003	0.0047	0.0007	0.0001	0.0005	0.0005	0.0004	0.0001	-0.0001	Finnish
HG01747	-0.0017	0.0028	-0.0018	-0.0005	-0.003	0.0004	0.0006	0	0.0004	0.0003	Spanish
HG01746	-0.002	0.0029	-0.0017	-0.0003	-0.0025	-0.0003	0.0001	0.0005	-0.0001	-0.0002	Spanish
HG01675	-0.002	0.0033	-0.0021	-0.0004	-0.0015	-0.0004	0.0008	-0.0002	0	-0.0001	Spanish
HG01680	-0.002	0.003	-0.0021	-0.0001	-0.0018	-0.0008	0	-0.0006	-0.0002	0.0002	Spanish
HG01682	-0.0022	0.0028	-0.0016	-0.0003	-0.0018	-0.0002	0	-0.0002	-0.0004	-0.0001	Spanish
HG01700	-0.0031	0.0036	-0.0027	-0.001	-0.0046	0.0011	0.0005	0.0001	0.0001	0	Spanish_North
HG01679	-0.0018	0.0031	-0.002	-0.0004	-0.001	-0.0002	0.0001	0.0003	0.0002	0.0002	Spanish
HG01702	-0.0031	0.004	-0.0023	-0.001	-0.0037	0.0005	0.0008	0.0004	0.0002	-0.0004	Spanish_North
HG01676	-0.0025	0.0036	-0.002	-0.0006	-0.0023	0.0014	0.0005	0.0001	0.0003	-0.0006	Spanish
HG01684	-0.0021	0.0029	-0.0019	-0.0004	-0.001	-0.001	0.0006	0	0.0001	-0.0002	Spanish
HG01705	-0.0014	0.003	-0.0016	0.0001	-0.0015	0.0003	0.0001	0.0001	0	0.0003	Spanish
HG01707	-0.0016	0.0027	-0.0014	-0.0001	0.0013	-0.0009	0.0001	0.0001	0.0005	0.0004	Spanish
HG01685	-0.0011	0.0025	-0.0013	0.0002	-0.0023	0.0003	-0.0004	0.0002	0.0002	0.0003	Spanish
HG01686	-0.0018	0.003	-0.0005	0.0001	-0.0014	-0.0005	-0.0006	0.0002	0	0.0001	Spanish
HG01704	-0.0008	0.0026	-0.001	0.0004	-0.0007	-0.0004	-0.0006	-0.0005	0.0003	0	Spanish
HG01673	-0.0018	0.0027	-0.0016	-0.0001	-0.0008	0.0007	0.0002	0.0001	-0.0002	-0.0003	Spanish
HG01695	-0.0002	0.0033	-0.0007	0.0007	-0.0021	0.0011	-0.0011	-0.0004	-0.0005	0.0004	Canary_Islander
HG01694	-0.0001	0.0029	-0.0012	0.0005	-0.002	-0.0003	-0.0013	0.0006	0	0.0004	Canary_Islander
HG01761	-0.002	0.0032	-0.002	-0.0001	-0.0015	-0.0009	0	-0.0003	0	-0.0004	Spanish
HG01770	-0.0016	0.003	-0.0022	-0.0002	-0.0013	-0.0004	0.0005	0.0003	0	-0.0003	Spanish
HG01762	-0.0023	0.0026	-0.0011	-0.0001	-0.0027	0.0002	0	0.0007	-0.0009	0.0003	Spanish
HG01773	-0.002	0.0032	-0.0023	-0.0002	-0.0021	0.0012	0	0.0007	-0.0002	-0.0004	Spanish
HG02220	-0.0017	0.0021	-0.0016	-0.0002	-0.002	-0.0001	-0.0002	-0.0001	0.0001	-0.0003	Spanish
HG02238	-0.0017	0.0032	-0.0013	-0.0004	-0.0015	0.0006	0.0002	0.0001	0.0001	-0.0001	Spanish
HG01678	-0.0017	0.0032	-0.0021	-0.0002	-0.0019	0.001	0.0005	0.0002	0.0004	-0.0003	Spanish
HG01699	-0.0011	0.0031	-0.0014	-0.0002	-0.0012	0.0009	-0.0007	-0.0001	0.0001	0	Spanish
HG01697	-0.0012	0.0026	-0.0013	0.0001	-0.0012	0.0008	-0.0003	0.0001	-0.0002	0.0001	Spanish
HG00160	-0.0039	0.0005	0.0005	-0.0002	0.0003	-0.0007	0.0005	0.0001	0.0001	-0.0005	English
LibyanJew1438	0.0052	0.0028	-0.0011	0.003	0.0127	0.0059	-0.0073	-0.0049	-0.0058	0.0045	Jew_Libyan
Malta4AM91	0.0017	0.0012	-0.0009	0.0008	0.0023	0.0001	-0.0005	-0.0005	-0.0026	-0.0008	Maltese
Malta8AM91	0.0018	0.0015	-0.0014	0.0006	0	0.0002	-0.0004	-0.0007	0.0002	0.0003	Maltese
CRO53	-0.0028	-0.0001	0.0008	0	0.0014	0.0002	0	0.0006	-0.0005	0.0002	Croatian
AshkenaziJew5779	0.0022	0.0009	-0.0014	0.0003	0.0019	-0.0001	-0.0005	0.0003	-0.0001	-0.0002	Jew_Ashkenazi
SephardiJewTurkey4955	0.003	0.0009	-0.0014	0.0004	0.0009	0.0008	-0.0006	-0.0005	0	0.0002	Jew_Turkish
NOR119	-0.0042	-0.0001	0.0011	-0.0004	-0.0004	-0.0006	-0.0002	0.0002	0.0001	0	Norwegian
NOR124	-0.0042	-0.0001	0.0013	0	-0.0007	-0.0001	0	-0.0007	-0.0003	-0.0001	Norwegian
CRO103	-0.0025	-0.0005	0.0015	0.0002	0.003	-0.0002	-0.0004	0.0003	0.0002	0.0002	Croatian
CRO107	-0.0027	-0.0007	0.0011	0.0001	0.004	-0.0003	0.0003	0.0005	0.0005	-0.0002	Croatian
TunisianJew1421	0.0049	0.0022	-0.0016	0.0018	0.0059	0.0044	-0.0061	-0.0037	-0.0049	0.004	Jew_Tunisian
SephardiJewTurkey5877	0.003	0.0008	-0.0019	0.0002	0.0018	0.001	-0.0009	0.0001	-0.0003	0.0005	Jew_Turkish
TP08	0.0013	0.0011	-0.0015	0	0.0006	0.0005	-0.0003	-0.0003	0.0005	-0.0001	Sicilian
GREEKGRALPOP18	-0.0003	0.0006	-0.0015	0.0001	0.0027	-0.0009	-0.0001	0.0001	0.0002	0.0004	Greek
AshkenaziJew5782	0.0019	0.0009	-0.0015	0.0001	0.0029	0.0018	-0.0009	0.0002	-0.0006	0	Jew_Ashkenazi
BEL57	0.0016	0.001	-0.0019	0.0001	0.0019	-0.0009	0.0002	0	0.0002	0.0002	Italian_South
BAS35	-0.0035	0.0041	-0.0029	-0.0013	-0.0051	0.0012	0.0013	0.0003	0.0005	-0.0005	Basque
SR23	0.0014	0.0008	-0.0023	0.0001	0.0007	0.0002	-0.0004	0.0001	-0.0002	-0.0001	Sicilian
CRO47	-0.0032	-0.0001	0.0006	0.0002	0.0016	0.0001	0	0.0001	-0.0004	-0.0002	Croatian
NOR106	-0.0038	0.0001	0.0006	0	-0.0018	-0.0007	0.0002	0.0002	0.0007	-0.0003	Norwegian
CRO41	-0.0028	-0.0005	0.0011	0.0001	0.0027	-0.0011	0.0004	-0.0002	-0.0005	-0.0003	Croatian
Malta7AM91	0.0023	0.0017	-0.001	0.0004	0.0036	0.0002	-0.0005	0.0002	-0.0005	0	Maltese
SephardiJewTurkey4953	0.0035	0.002	-0.0012	0.0006	0.003	0.0006	-0.0011	-0.0004	-0.0007	-0.0003	Jew_Turkish
SephardiJewTurkey6077	0.0034	0.0017	-0.0013	0.0003	0.0045	0.0002	-0.0005	-0.0004	-0.0005	0.0003	Jew_Turkish
NOR101	-0.004	0.0005	0.0006	-0.0004	-0.001	0.0003	0	-0.0001	0	-0.0002	Norwegian
SephardiJewTurkey5832	0.0035	0.001	-0.0016	0.0002	0.004	0.0009	-0.0005	0.0002	-0.0004	0.0003	Jew_Turkish
YemeniteJew4684	0.0078	0.0025	0.0017	0.0024	0.0062	0.0063	0.0025	0.0017	-0.0005	-0.0002	Jew_Yemenite
TP05	0.0019	0.0014	-0.001	0.0004	0.0011	-0.0006	-0.0005	-0.0004	-0.0002	-0.0003	Sicilian
Kayseri24392	0.0028	-0.002	-0.0015	-0.0002	-0.0003	0.0009	0	0.0001	0	0	Turkish
YemeniteJew4695	0.0083	0.0031	0.0022	0.0021	0.0071	0.0052	0.002	0.0003	0.0008	-0.0001	Jew_Yemenite
SR60	0.0019	0.0011	-0.0009	0.0001	0.0027	0.0002	-0.0002	0.0001	0	0.0001	Sicilian
NOR146	-0.0042	0	0.0009	-0.0003	-0.0017	0.0005	0	-0.0001	-0.0007	0.0005	Norwegian
TP06	0.0011	0.0013	-0.0017	0.0002	0.0012	0.0005	-0.0003	0.0006	0.0009	0	Sicilian
NOR108	-0.0044	0.0002	0.0011	-0.0003	-0.0013	-0.0009	0.0008	-0.0006	0.0003	-0.0005	Norwegian
CRO66	-0.002	-0.0006	0.0009	0.0004	0.0023	0	0.0005	0	-0.0003	0.0004	Croatian
IranianJew1409	0.0052	-0.0019	-0.0017	-0.0003	0.0032	-0.001	0	-0.0004	0	0.0002	Jew_Iranian
NOR126	-0.0043	0.0001	0.001	-0.0004	-0.0013	0	0.0005	0.0002	-0.0003	-0.0001	Norwegian
SephardiJewTurkey5075	0.0027	0.001	-0.0014	-0.0001	0.0012	0.0005	-0.0013	0.0001	-0.0001	0.0006	Jew_Turkish
GREEKGRALPOP13	0.0002	0.0005	-0.0013	-0.0002	-0.0011	0.0006	-0.0006	0.0002	-0.0005	0.0004	Greek
TP07	0.002	0.0013	-0.0013	0.0003	-0.0001	0.0008	-0.0004	-0.0003	0.0003	-0.0001	Sicilian
BAS31	-0.0035	0.0043	-0.0028	-0.0013	-0.0044	0.001	0.0009	0.0003	0.0004	-0.0002	Basque
ALB191	-0.0006	-0.0002	-0.0008	-0.0001	0.0019	-0.001	-0.0006	0.0001	0.0004	0.0002	Albanian
GREEKGRALPOP15	-0.0003	-0.0001	-0.0012	0.0002	-0.0005	-0.0005	-0.0004	-0.0003	-0.0002	0	Greek
SephardiJewTurkey4950	0.0025	0.0007	-0.0014	0.0002	0.0015	0.0006	-0.0003	0.0002	0.0002	0.0003	Jew_Turkish
NOR107	-0.0044	-0.0003	0.0009	0	0.0009	0.0007	-0.0007	0.0001	0.0004	-0.0003	Norwegian
SephardiJewTurkey5033	0.0031	0.0015	-0.0018	0.0005	0.0029	-0.0001	-0.0002	-0.0007	-0.0005	-0.0001	Jew_Turkish
GREEKGRALPOP5	0.0001	0.0003	-0.001	-0.0004	0.0024	-0.0002	0.0001	-0.0005	-0.0003	-0.0002	Greek
YemeniteJew4675	0.0077	0.0022	0.0006	0.0019	0.0077	0.005	-0.0071	-0.0031	-0.0061	0.002	Jew_Yemenite
CRO153	-0.0024	-0.0005	0.001	0	0.0019	-0.0006	0	0.0003	0	0.0001	Croatian
NOR109	-0.0046	0.0002	0.0008	-0.0003	0	-0.0012	0.0004	0.0004	-0.0001	0.0002	Norwegian
SouthFrench3326	-0.0032	0.0031	-0.0025	-0.0006	-0.0022	0.0012	0	0.0002	-0.0002	-0.0005	French
GREEKGRALPOP9	-0.0003	0.0004	-0.001	-0.0001	0.0014	-0.0004	0	-0.0001	-0.0001	0.0004	Greek
TP04	0.001	0.0014	-0.0017	0	0.001	0.0014	-0.0001	-0.0006	-0.0001	-0.0002	Sicilian
CRO31	-0.0026	-0.0003	0.0012	0.0003	0.0025	-0.0012	-0.0009	0.0001	-0.0002	-0.0002	Croatian
TP25	0.0015	0.0013	-0.002	0.0001	0.0006	-0.0001	-0.0003	0.0004	-0.0006	0.0002	Sicilian
GREEKGRALPOP4	0.0006	0.0004	-0.0012	-0.0005	0.0017	-0.0007	0.0001	-0.0004	0.0003	0.0006	Greek
LibyanJew1601	0.0045	0.0021	-0.0013	0.0021	0.0223	0.0119	-0.084	0.0645	-0.0041	-0.1179	Jew_Libyan
CRO93	-0.0026	-0.0002	0.0014	0.0004	0.0015	-0.0013	-0.0002	-0.0001	-0.0002	0.0002	Croatian
Malta17AM91	0.002	0.002	-0.0014	0.0008	0.0012	-0.0004	-0.0006	-0.0001	0	0	Maltese
SouthFrench3947	-0.0028	0.0032	-0.0019	-0.0005	-0.004	0.0008	0.0007	0.0003	-0.0005	0.0001	French
SouthFrench1323	-0.003	0.0032	-0.0026	-0.0008	-0.003	0.0008	0.0008	0.0004	0.0004	-0.0003	French
SR48R	0.0016	0.0009	-0.0013	0.0001	0.0016	0.0013	0.0001	0.0002	-0.0003	0	Sicilian
YemeniteJew4938	0.0078	0.0021	0.0017	0.0012	0.0093	0.0036	-0.0045	-0.0031	-0.0017	0.0004	Jew_Yemenite
SR44	0.0016	0.0012	-0.0016	0.0003	0.0007	-0.0002	-0.0003	0.0001	-0.0006	0.0003	Sicilian
SR64	0.0016	0.0009	-0.0014	0.0003	0.0017	-0.0001	-0.0001	-0.0005	0.0003	0	Sicilian
NOR148	-0.0048	-0.0004	0.0013	0.0001	-0.0008	0.0003	0.0001	0.0004	0.0001	-0.0003	Norwegian
IraqiJew4061	0.0052	-0.0009	-0.0014	-0.0002	0.0019	-0.0006	0.0005	0.0002	-0.0004	0	Jew_Iraqi
CYP19	0.0036	0.0005	-0.0026	0.0001	0.0011	0.0006	-0.0001	-0.0001	-0.0001	0	Cypriot
CRO48	-0.0025	-0.0003	0.0003	0.0002	0.0026	-0.0009	-0.0002	0.0001	-0.0006	-0.0001	Croatian
GREEKGRALPOP17	-0.0003	0	-0.0005	0.0001	0.0026	-0.0007	0	0.0001	-0.0001	0.0001	Greek
ALB213	0	0.0002	-0.0014	-0.0004	-0.0004	-0.0001	0.0002	0	0	0.0001	Albanian
Turkish7BA57	0.0018	-0.002	-0.0009	-0.0003	0.0013	0.0011	0.0003	0.0001	0.0006	-0.0003	Turkish
BAS22	-0.0034	0.0042	-0.0025	-0.0009	-0.006	0.0007	0.0006	0.0004	0.0002	-0.0002	Basque
GREEKGRALPOP16	0.0002	0.0004	-0.0012	-0.0002	0.0016	-0.0006	-0.0007	0	-0.0002	0.0006	Greek
LibyanJew1104	0.0044	0.0017	-0.0014	0.0018	0.0126	0.0139	-0.0549	0.007	-0.0299	-0.1381	Jew_Libyan
NOR111	-0.0043	0.0002	0.001	-0.0001	0.0002	0.0002	0.0004	-0.0002	0	-0.0001	Norwegian
SouthFrench3951	-0.0027	0.0039	-0.0026	-0.0007	-0.0031	0.0001	0.0011	0.0001	-0.0004	-0.0003	French
BAS25	-0.0034	0.0043	-0.0029	-0.0014	-0.0054	0.0005	0.0012	0.0004	0.0003	-0.0005	Basque
BAS32	-0.0031	0.0045	-0.0032	-0.0011	-0.0035	0.0006	0.0005	0.0003	-0.0003	-0.0003	Basque
GREEKGRALPOP11	-0.0001	0.0001	-0.001	0.0002	0.0013	0.0001	0.0004	-0.0001	0.0001	-0.0003	Greek
GREEKGRALPOP10	0.0002	-0.0002	-0.0009	-0.0004	0.0011	0.0002	0.0001	0.0006	0.0005	-0.0001	Greek
Malta2AM91	0.0026	0.0007	-0.0013	0.0006	0.002	0.0001	-0.0015	-0.0002	-0.0001	0	Maltese
GREEKGRALPOP3	-0.0003	0.0006	-0.0011	-0.0001	0.0023	0.0005	-0.0002	-0.0001	-0.0003	0	Greek
Malta16AM91	0.0025	0.0019	-0.0015	0.0009	0.0017	-0.0009	-0.0009	0.0001	0.0006	-0.0003	Maltese
GREEKGRALPOP8	-0.0004	0.0003	-0.0011	-0.0005	0.0017	-0.0011	0.0002	0	-0.0004	0.0005	Greek
IranianJew1132	0.0052	-0.0014	-0.0018	-0.0001	0.0033	-0.001	0.0006	-0.0001	0	0	Jew_Iranian
MoroccanJew5126	0.0034	0.0022	-0.0019	0.0008	0.0034	0.0022	-0.0011	0.0004	0.001	0.0004	Jew_Moroccan
Turkish8BA62	0.0008	-0.002	0.0003	0	-0.0009	0.0013	0.0002	-0.0002	0.0002	0.0001	Turkish
LibyanJew1462	0.0042	0.0022	-0.0018	0.0017	0.0137	0.0121	-0.0242	0.0084	-0.0159	-0.0816	Jew_Libyan
CYP5	0.0038	0.0001	-0.0021	0.0001	0.0021	-0.0004	-0.0007	-0.0003	0.0004	-0.0001	Cypriot
SouthFrench3068	-0.003	0.0034	-0.0024	-0.0005	-0.0039	0.0014	0.0001	0.0004	0.0004	-0.0004	French
Cyprus13AJ19	0.0028	0.0002	-0.0014	-0.0001	0.0016	0.0007	-0.0007	-0.0003	0	0.0001	Cypriot
TunisianJew1763	0.0048	0.0027	-0.0013	0.002	0.0193	0.0135	-0.0833	0.0366	-0.0583	-0.1763	Jew_Tunisian
Malta15AM91	0.0019	0.0014	-0.0015	0.0003	-0.0002	0.0004	-0.0003	0.0006	-0.0002	0.0002	Maltese
MoroccanJew4634	0.0036	0.0015	-0.0012	0.0009	0.0027	0.0015	-0.0021	0.0001	0	-0.0011	Jew_Moroccan
LibyanJew1263	0.0048	0.0028	-0.0012	0.002	0.0073	0.0047	-0.0062	-0.0046	-0.0057	0.002	Jew_Libyan
Istanbul20010	0.0035	-0.0027	-0.001	-0.0005	-0.0017	0.0002	0.0002	-0.0003	0	-0.0005	Turkish
BAS30	-0.0035	0.0049	-0.0025	-0.0012	-0.0057	0.0005	0.001	0.0001	0	-0.0007	Basque
Cyprus24AJ19	0.0037	0.0005	-0.0021	0.0001	0.003	-0.0002	-0.0002	0.0001	-0.0001	-0.0001	Cypriot
YemeniteJew4667	0.0084	0.0032	0.0022	0.0024	0.0205	0.0012	-0.0069	-0.0514	-0.0143	0.0033	Jew_Yemenite
TunisianJew1507	0.0052	0.0026	-0.0011	0.0022	0.0086	0.0031	-0.0046	-0.0037	-0.0044	0.0031	Jew_Tunisian
IraqiJew4241	0.0055	-0.0012	-0.0017	-0.0001	0.0007	0.0009	-0.0002	-0.0001	0.0001	0.0002	Jew_Iraqi
TunisianJew1544	0.004	0.0017	-0.0015	0.0011	0.0053	0.0007	-0.0124	0.0116	0.0055	-0.0032	Jew_Tunisian
AshkenaziJew5783	0.0015	0.0004	-0.0007	0.0002	0.0018	0.0016	-0.0006	-0.0002	-0.0003	0.0005	Jew_Ashkenazi
Turkish4BA57	0.0021	-0.0025	0	-0.0006	-0.0008	0.0006	0	-0.0003	0.0003	0.0006	Turkish
AshkenaziJew5704	0.002	0.0008	-0.0014	0.0002	0.0033	0.0001	-0.0019	-0.0001	-0.0005	0.0001	Jew_Ashkenazi
MoroccanJew4789	0.0035	0.0016	-0.0019	0.001	0.0032	0.0013	-0.0011	0.0001	-0.0005	-0.0009	Jew_Moroccan
IranianJew1159	0.0054	-0.0015	-0.0017	-0.0004	0.0033	-0.0001	0.0001	-0.0001	-0.0008	0.0001	Jew_Iranian
MoroccanJew5168	0.0035	0.0016	-0.0011	0.001	0.0028	0.0022	-0.0011	0	0	0.0008	Jew_Moroccan
IranianJew1513	0.0052	-0.0016	-0.0017	-0.0004	0.0027	0.0002	-0.0001	-0.0003	-0.0005	0.0003	Jew_Iranian
AshkenaziJew5728	0.0016	0.0007	-0.0013	0.0003	0.0003	0.0002	-0.0005	-0.0001	0	-0.0002	Jew_Ashkenazi
ALB202	-0.0001	-0.0001	-0.0014	-0.0006	0.002	-0.0008	-0.0002	-0.0005	0.0002	-0.0003	Albanian
YemeniteJew4960	0.0078	0.0027	0.002	0.0024	0.0275	0.0104	-0.0234	-0.061	-0.0087	-0.0008	Jew_Yemenite
GREEKGRALPOP12	0.0004	-0.0002	-0.001	0.0001	0.0032	-0.0002	-0.0002	0	-0.0001	0.0003	Greek
SouthFrench1112	-0.0027	0.0034	-0.0025	-0.0007	-0.0031	-0.0001	0.0004	-0.0001	0.0003	-0.0002	French
AshkenaziJew5790	0.0016	0.0016	-0.0008	0.0004	0.0024	0.0003	-0.0009	-0.0001	-0.0002	0.0004	Jew_Ashkenazi
CYP2	0.0036	0.0002	-0.0021	-0.0002	0.0002	0.0004	-0.0003	-0.0004	-0.0003	0.0001	Cypriot
GeorgianJew1607	0.0044	-0.0024	-0.0014	-0.0003	0.0011	0.0001	-0.0003	-0.0002	0	-0.0001	Jew_Georgian
GeorgianJew1671	0.0045	-0.0019	-0.002	-0.0006	0.0002	0.0016	-0.0001	-0.0001	-0.0007	-0.0003	Jew_Georgian
Cyprus2AJ19	0.0053	0.0005	-0.002	0.0001	0.0024	0.0005	0.0004	0.0003	0.0003	-0.0001	Cypriot
Adana23114	0.0034	-0.0024	-0.0014	-0.0005	-0.0015	0.001	0.0001	-0.0001	0.0002	0.0001	Turkish
GREEKGRALPOP14	0.0001	0.0007	-0.0013	0.0001	0.0029	-0.0007	-0.0006	-0.0001	0.0001	0.0002	Greek
IranianJew1556	0.005	-0.0012	-0.0017	-0.0005	0.0021	0.0004	0	0.0004	-0.0007	-0.0001	Jew_Iranian
TunisianJew1170	0.0043	0.0024	-0.0015	0.001	0.0079	0.0092	-0.0295	0.0139	0.0033	-0.0458	Jew_Tunisian
TunisianJew1531	0.0044	0.0025	-0.0015	0.0017	0.018	0.0159	-0.0981	0.018	-0.1516	-0.1983	Jew_Tunisian
SouthFrench4018	-0.0029	0.0038	-0.003	-0.0009	-0.0047	-0.0001	0.0012	-0.0002	0.0003	-0.0006	French
Trabzon21177	0.0044	-0.0024	-0.0031	-0.0013	-0.0015	0.0008	-0.0001	0.0005	-0.0001	0.0001	Turkish
GeorgianJew1577	0.0044	-0.0019	-0.002	-0.0011	-0.001	0.0008	-0.0001	0.0002	0.0001	-0.0002	Jew_Georgian
BAS28	-0.0034	0.0042	-0.0032	-0.0012	-0.0051	0.0013	0.0005	0.0009	0.0004	-0.0007	Basque
Aydin18784	0.0023	-0.0024	-0.0001	0	-0.0004	0.0022	-0.0012	-0.0003	-0.0009	0	Turkish
IraqiJew1417	0.0055	-0.001	-0.002	-0.0004	0.0009	0.0005	0.0003	-0.0004	-0.0001	-0.0001	Jew_Iraqi
Istanbul19810	0.0025	-0.0029	-0.0014	-0.0007	-0.0007	0.0005	0	-0.0001	0.0001	-0.0005	Turkish
Trabzon21557	0.0044	-0.0021	-0.004	-0.0011	0.0009	-0.0003	-0.0004	-0.0001	0.0006	0.0001	Turkish
LibyanJew1611	0.0043	0.0023	-0.0014	0.002	0.0197	0.0183	-0.0708	0.0687	-0.0213	-0.1597	Jew_Libyan
IranianJew1557	0.0043	-0.0024	-0.0013	0	0.0023	0.0007	0.0003	0	0.0003	0	Jew_Iranian
GeorgianJew1971	0.0043	-0.0019	-0.0015	-0.0006	0.0011	0.0014	-0.0002	0	-0.0008	-0.0004	Jew_Georgian
GeorgianJew1594	0.0047	-0.0019	-0.0024	-0.0007	0.0006	0.0002	0	0.0001	0.0002	-0.0001	Jew_Georgian
MoroccanJew4692	0.0037	0.002	-0.0019	0.0007	0.0012	0.0016	-0.0022	-0.0002	-0.0004	-0.0012	Jew_Moroccan
ALB212	-0.0001	0.0009	-0.0015	-0.0001	0.0022	0.0006	-0.0006	0.0005	0.0003	0.0002	Albanian
IraqiJew1771	0.0051	-0.0009	-0.0018	-0.0002	0.002	-0.0009	0.0003	-0.0002	-0.0007	0.0001	Jew_Iraqi
YemeniteJew5433	0.008	0.0028	0.0018	0.002	0.0125	0.0014	-0.0082	-0.0038	-0.0096	0.0023	Jew_Yemenite
ALB220	0.0004	0.0004	-0.0009	0.0001	0.0028	-0.0004	0	0	0.0004	0.0002	Albanian
Cyprus22AJ19	0.0035	0.0009	-0.0021	-0.0004	0.001	0.0002	-0.0002	0.0001	-0.0008	-0.0001	Cypriot
YemeniteJew4937	0.0081	0.002	0.0014	0.0021	0.0087	0.0121	-0.0101	-0.0289	0.0199	0.0276	Jew_Yemenite
Malta12AM91	0.0021	0.002	-0.0014	0.0005	0.0002	0.0008	0.0006	0.0002	0.0006	0.0004	Maltese
Trabzon21534	0.0039	-0.0019	-0.0028	-0.001	0.0012	0.0008	0	-0.0003	-0.0001	0.0001	Turkish
LibyanJew1605	0.0045	0.0024	-0.0014	0.0021	0.0188	0.0198	-0.1395	0.0412	-0.01	-0.1829	Jew_Libyan
BAS27	-0.0033	0.0043	-0.0033	-0.0011	-0.0038	-0.0003	0.001	0.0001	0.0003	-0.0004	Basque
Cyprus21AJ19	0.0045	0.0001	-0.0018	0	0.0004	0.0005	-0.0002	0.0001	0.0001	0.0001	Cypriot
TunisianJew1511	0.0044	0.0022	-0.001	0.0017	0.0236	0.0211	-0.1822	0.0884	-0.0154	-0.2229	Jew_Tunisian
Turkish9BA57	0.0029	-0.003	-0.0007	-0.0003	-0.0016	0.0012	-0.0009	0.0001	0.0002	0.0002	Turkish
Kayseri24075	0.0034	-0.0023	-0.0014	-0.0008	-0.0021	0.0002	-0.0004	0	-0.0003	-0.0005	Turkish
IraqiJew4291	0.0055	-0.0008	-0.0018	-0.0001	0.0012	0.0022	0.0001	0.0004	-0.0004	0	Jew_Iraqi
ALB230	-0.0005	0.0005	-0.0008	-0.0001	0.0027	-0.0011	0	0.0005	-0.0004	0	Albanian
Adana23108	0.0049	0.0001	-0.0019	0.0002	0.0013	0.0005	0.0004	0	-0.0005	-0.0001	Turkish
IranianJew1143	0.0057	-0.0013	-0.0021	-0.0002	0.0026	0.0002	-0.0006	0.0001	-0.0003	0.0004	Jew_Iranian
MoroccanJew4683	0.0034	0.0017	-0.0015	0.0008	0.0035	0.0014	-0.0012	0.0003	-0.0012	-0.0006	Jew_Moroccan
IranianJew1832	0.005	-0.0016	-0.0015	-0.0001	0.0014	0.0014	-0.0002	-0.0002	-0.0002	0.0003	Jew_Iranian
GeorgianJew1654	0.0048	-0.0019	-0.0019	0	0.0013	-0.0003	0.0005	0	-0.0002	0	Jew_Georgian
BAS33	-0.0032	0.0041	-0.0026	-0.0011	-0.0029	-0.0001	0.001	0.0005	0.0003	-0.0002	Basque
GeorgianJew1883	0.0045	-0.0025	-0.0013	-0.0004	0.0009	0.0011	-0.0001	0.0004	-0.0003	-0.0002	Jew_Georgian
LibyanJew1639	0.0048	0.0022	-0.0009	0.0018	0.0254	0.0251	-0.1505	0.0084	-0.0925	-0.2437	Jew_Libyan
LibyanJew1659	0.0047	0.0028	-0.0014	0.0033	0.0413	0.0567	-0.1644	0.1304	-0.079	-0.2437	Jew_Libyan
Kayseri24266	0.003	-0.0026	-0.0009	-0.0004	-0.001	0.0004	-0.0001	-0.0004	-0.0001	-0.0003	Turkish
Istanbul25095	-0.0007	-0.0018	0.0009	0	0.0011	-0.0002	-0.0007	-0.001	0.0001	0.0003	Turkish
Aydin18112	0.0027	-0.0027	-0.0005	-0.0003	-0.001	0.0005	0.0004	0.0003	-0.0001	-0.0001	Turkish
Kayseri24402	0.0027	-0.0021	-0.0013	-0.0003	0.0002	0.0002	0.0003	0.0004	-0.0003	0.0001	Turkish
Istanbul25081	0.0019	-0.0023	-0.0007	0	0.0014	0.0001	-0.0003	-0.0007	0.0003	0.0003	Turkish
Aydin18596	0.0021	-0.0037	0.0005	-0.0003	-0.0022	0.0012	-0.0003	-0.0002	0.0002	-0.0002	Turkish
Istanbul17778	0.003	-0.0036	-0.0008	-0.0009	-0.001	0	-0.0003	-0.0001	0	-0.0001	Turkish
IraqiJew1430	0.0055	-0.0012	-0.0016	-0.0004	0.0026	0.0011	-0.0006	-0.0003	-0.0006	0.0003	Jew_Iraqi
Istanbul15781	0.0005	-0.0009	0.0002	0.0002	-0.0005	-0.0001	-0.0003	0.0001	0	0.0005	Turkish
Adana23136	0.0046	-0.0001	-0.0014	0.0001	0.0021	0.0004	-0.0003	0.0002	-0.0003	0.0001	Turkish
AshkenaziJew5788	0.0019	0.0008	-0.0014	0.0002	0.0017	0.0005	-0.0011	-0.0006	-0.0013	0.0005	Jew_Ashkenazi
Adana23113	0.0037	-0.0037	-0.0011	-0.0002	-0.0005	0.001	0.0002	0	0.0003	0.0001	Turkish
Trabzon21575	0.0039	-0.0025	-0.0035	-0.0009	0.0001	0	0	0.0001	0.0001	-0.0002	Turkish
Aydin18636	0.0025	-0.0028	0.0002	-0.0002	-0.0004	0.0012	-0.0002	0.0001	-0.0001	-0.0001	Turkish
Istanbul20040	0.0038	-0.0033	-0.0008	0.0001	-0.0015	-0.0005	0.0001	0.0006	0.0001	0.0001	Turkish
Adana23144	0.0034	-0.0036	0	0.0003	-0.0025	0.0002	0	0	0	0	Turkish
Kayseri23967	0.0032	-0.0031	-0.001	-0.0005	-0.0022	0.0015	-0.0001	0.0002	0	-0.0001	Turkish
IranianJew1845	0.0053	-0.0016	-0.0013	-0.0001	0.0009	-0.0005	0.0009	-0.0005	-0.0001	0.0002	Jew_Iranian
Trabzon21174	0.0036	-0.0026	-0.0028	-0.0009	-0.0011	0	0	-0.0003	0.0002	0.0002	Turkish
Aydin18873	0.0017	-0.0023	-0.0001	0	0.0009	0.0011	-0.0005	0.0002	-0.0004	0.0001	Turkish
Kayseri23892	0.0034	-0.0024	-0.0008	-0.0001	0.0003	0.001	0	0.0001	-0.0003	0	Turkish
Istanbul19185	0.0025	-0.0027	-0.0007	-0.0003	-0.0013	0.0004	0.0007	-0.0002	0	-0.0003	Turkish
Istanbul25098	-0.0008	-0.0002	-0.0005	-0.0002	0.0017	-0.0002	0.0001	0.0004	-0.0005	-0.0003	Turkish
Adana23133	0.0036	-0.0021	-0.0006	-0.0004	-0.0018	0.0012	0	-0.0001	-0.0003	-0.0003	Turkish
Trabzon21515	0.0036	-0.0018	-0.0035	-0.0012	-0.0007	0.0006	-0.0005	0.0006	0	0.0003	Turkish
Kayseri24032	0.0033	-0.0023	-0.0011	-0.0007	-0.0017	0	-0.0002	-0.0001	0.0002	0.0001	Turkish
Kayseri23549	0.0035	-0.0028	-0.0005	-0.0001	-0.0017	0.0015	-0.0004	0.0001	0.0002	0.0004	Turkish
Trabzon21544	0.004	-0.0026	-0.0031	-0.0011	-0.0005	-0.0004	-0.0003	-0.0001	-0.0003	0	Turkish
Adana23150	0.0019	-0.0023	0.0001	0	-0.0007	0.0006	-0.0003	-0.0003	-0.0008	0	Turkish
Kayseri23271	0.0034	-0.0021	-0.0018	-0.0008	-0.0002	0.0003	0.0004	-0.0003	0.0002	-0.0002	Turkish
Trabzon21645	0.0035	-0.0028	-0.0024	-0.0011	-0.001	0.0003	0.0001	0	0.0004	0.0004	Turkish
Adana23147	0.0038	-0.001	-0.0009	-0.0002	-0.0007	0.0013	-0.0003	0.0001	-0.0003	-0.0001	Turkish
Aydin18483	0.0027	-0.0041	0	-0.0002	-0.0029	0.0014	-0.0003	0	0.0004	0	Turkish
Aydin18419	0.002	-0.003	-0.0004	0	0.0017	0.0012	-0.0007	-0.0003	-0.0008	0	Turkish
Kayseri24276	0.0038	-0.0024	-0.0014	-0.0007	0.0003	0.0021	-0.0006	0.0002	-0.0008	0.0002	Turkish
Istanbul19708	0.003	-0.0037	0.0001	-0.0005	-0.0008	0.001	-0.0001	-0.0007	-0.0002	0.0004	Turkish
Trabzon21173	0.0043	-0.0026	-0.0036	-0.0014	-0.0009	0.0002	0.0004	-0.0005	0	0.0002	Turkish
Adana23112	0.0031	-0.0027	-0.0004	-0.0003	-0.0007	0.0017	-0.0003	0.0002	-0.0009	0.0003	Turkish
Adana23117	0.0031	-0.0024	-0.0004	-0.0001	-0.003	0.0008	-0.0001	0.0004	0	0	Turkish
French23812	-0.0042	0.0009	-0.0006	-0.0005	-0.0025	0.0002	0.0004	0	0.0005	0	French
French23814	-0.0031	0.0011	0.0003	-0.0004	0	-0.001	0.0004	0.0003	-0.0001	-0.0004	French
French23821	-0.0012	0.0008	-0.001	0.0002	-0.0006	-0.0004	0.0004	-0.0003	0	0.0001	French
French23830	-0.0034	0.001	0.0001	-0.0002	-0.0021	0.0002	0.0003	0	0	0	French
French23833	-0.0039	0.0007	0.0006	-0.0004	-0.0022	0.0004	0.0005	0.0001	0.0003	-0.0001	French
French23862	-0.0035	0.001	0.0005	-0.0001	-0.0015	-0.0001	0.0002	0.0002	-0.0005	-0.0002	French
French23915	-0.0031	0.0006	-0.0003	-0.0004	0.0002	-0.0007	0	-0.0004	0.0006	-0.0002	French
French23919	-0.0025	0.0014	-0.0004	-0.0003	-0.0011	0.0001	0.0003	0	-0.0001	-0.0001	French
French23989	-0.0043	0.0011	0.0006	-0.0002	-0.0053	-0.0004	0.0007	-0.0009	0.0012	0.0001	French
French24061	-0.0033	0.001	-0.0004	-0.0005	-0.0014	0.0003	0.0003	0	0.001	-0.0003	French
French24075	-0.0029	0.0017	-0.0007	-0.0002	-0.0012	-0.0005	0	-0.0001	0	0	French
French24076	-0.0027	0.001	-0.0008	0	0.0001	-0.0001	0.0002	-0.0001	0	0.0002	French
French24090	-0.0041	0.0003	-0.0002	-0.0004	-0.0025	0.0002	0	0.0006	-0.0002	0	French
French24118	-0.0038	0.0014	-0.0001	-0.0007	-0.0034	0.0001	-0.0002	-0.0002	0.0005	0.0003	French
French24120	-0.0038	0.0011	0.0003	-0.0001	-0.0017	-0.0002	0.0004	-0.0002	0.0003	-0.0001	French
French24124	-0.0025	0.0014	-0.0004	-0.0003	-0.0013	0	0.0003	-0.0001	0.0002	0	French
French24144	-0.0024	0.0018	0.0006	0.0002	-0.0038	0.0006	0.0005	-0.0004	0.0009	0.0004	French
French24148	-0.0027	0.0013	-0.0009	-0.0004	-0.0004	-0.0002	-0.0002	-0.0002	-0.0002	-0.0002	French
French24178	-0.0029	0.0012	0.0006	-0.0001	-0.0023	-0.0012	0.0008	-0.0004	0.0013	-0.0001	French
French24247	-0.0041	0.0008	0.0004	-0.0004	-0.0042	0.0003	0.0004	-0.0001	0.0002	-0.0003	French
French24381	-0.004	0.0008	0.0002	-0.0004	-0.0022	0	0.0004	0.0004	0.0005	0	French
French24400	-0.0041	0.0012	0.0004	-0.0004	-0.002	-0.0004	0.0007	0.0001	0.0001	-0.0006	French
French24408	-0.0029	0.0011	-0.0003	-0.0005	-0.0017	-0.0002	0.0003	-0.0003	0.0004	0.0001	French
French24433	-0.0029	0.0014	0.0006	-0.0002	-0.0036	-0.0013	0.0008	-0.0012	0.0004	0.0005	French
French24434	-0.0033	0.0004	0.0002	0.0001	-0.0012	0.0011	0	-0.0005	0.0005	-0.0002	French
French24437	-0.0026	0.0007	-0.0001	-0.0001	0.0003	0.0011	0.0003	0.0006	0.0003	-0.0001	French
French24690	-0.0029	0.0008	-0.0006	-0.0004	-0.0007	-0.0005	0.0006	0.0002	0.0008	0.0001	French
French24817	-0.003	0.0013	0.0001	-0.0002	-0.0045	0.0008	0.0005	-0.0008	0.001	0.0001	French
French25068	-0.003	0.0014	-0.0004	-0.0004	0.0007	-0.0005	0.0003	-0.0003	0.0001	0	French
PV019	0.0046	-0.005	-0.001	-0.0004	-0.0015	0.0003	0.0008	-0.0002	0.0001	-0.0002	Iranian
PV020	0.0043	-0.004	-0.0008	-0.0004	-0.0023	0.0002	0.0009	0	0.0002	0.0003	Iranian
PV021	0.004	-0.0049	-0.0005	-0.0006	-0.0011	0.0011	0.0005	0.0002	0	0.0003	Iranian
PV022	0.0044	-0.0046	-0.0013	-0.0004	-0.0003	0.0007	0.0003	-0.0001	0.0005	-0.0001	Iranian
PV023	0.0046	-0.0051	-0.001	-0.0005	-0.0019	0.0001	0.0001	-0.0002	0.0002	0.0003	Iranian
PV024	0.0045	-0.0048	-0.0008	-0.0005	-0.001	0.0006	-0.0001	-0.0001	-0.0003	-0.0003	Iranian
PV025	0.0046	-0.0045	-0.0007	-0.0005	-0.0008	0.0003	0.001	-0.0004	0.0004	0.0001	Iranian
PV026	0.0044	-0.0052	-0.0013	-0.0004	-0.002	0.0005	0.0003	-0.0001	-0.0002	0.0003	Iranian
PV027	0.0045	-0.0049	-0.001	-0.0002	-0.0004	0.0007	0.0001	0	0.0007	0.0001	Iranian
PV028	0.0045	-0.005	-0.0013	-0.0006	-0.0012	0.0004	-0.0001	-0.0003	0.0004	0	Iranian
ITS4	0.002	0.0007	-0.0017	-0.0002	0.0009	0.0003	-0.0001	0.0003	0.0004	-0.0001	Italian_South
ITS5	0.0015	0.0011	-0.0014	-0.0003	0.0001	-0.0006	0.0001	-0.0002	0.0004	0.0001	Italian_South
ITS7	0.0015	0.001	-0.0017	0.0002	0.0005	-0.0011	-0.0002	0.0006	0.0002	0.0006	Italian_South
PV009	0.0043	-0.0031	-0.001	-0.0001	-0.0008	0.0009	-0.0006	0	0	-0.0003	Iranian
PV010	0.0043	-0.0033	-0.0004	-0.0002	-0.0023	0.0001	0.0002	0	-0.0002	-0.0001	Iranian
PV011	0.0043	-0.0035	-0.0007	-0.0002	-0.0005	0.0007	0.0002	0.0003	-0.0008	-0.0002	Iranian
PV012	0.005	-0.0035	-0.0014	-0.0004	0.0003	0.0004	-0.0001	-0.0005	0.0003	0.0005	Iranian
PV013	0.0044	-0.004	-0.0004	-0.0001	-0.0003	0.0002	0.0004	-0.0001	-0.0001	-0.0004	Iranian
PV014	0.0038	-0.0037	-0.001	-0.0007	-0.001	0.0002	0.0005	0.0001	0.0004	-0.0004	Iranian
PV015	0.0045	-0.0034	-0.0007	-0.0001	-0.0027	0.0004	0.0006	-0.0001	0	-0.0003	Iranian
PV016	0.0048	-0.0033	-0.0006	-0.0004	-0.001	0.0002	0.0002	0.0004	-0.0001	-0.0005	Iranian
PV017	0.0042	-0.0038	-0.0008	-0.0005	-0.0019	0.0008	0.0007	-0.0002	-0.0001	-0.0002	Iranian
PV018	0.0043	-0.0038	-0.0007	-0.0003	-0.0007	-0.0001	0.0006	-0.0001	-0.0003	-0.0002	Iranian
PV029	0.0047	-0.0034	-0.0007	-0.0004	-0.0018	0.0005	0.0002	0.0001	0.0003	0	Iranian
PV030	0.0046	-0.0035	-0.0003	-0.0001	0.0002	0.001	0.0001	-0.0003	0.0002	0.0002	Iranian
PV031	0.0047	-0.0042	0.0005	0.0002	-0.0003	0.0013	0.0001	-0.0002	-0.0002	-0.0001	Iranian
PV032	0.0045	-0.0039	0.0002	-0.0003	-0.0005	0.0009	0.0006	0	-0.0006	-0.0002	Iranian
PV033	0.0042	-0.0036	0.0005	0	0.0007	0.0011	0	-0.0004	0.0004	0.0001	Iranian
PV034	0.0042	-0.0034	-0.0004	-0.0002	-0.0008	0.0006	0.0002	-0.0001	-0.0002	-0.0002	Iranian
PV035	0.0042	-0.0038	0	-0.0004	-0.0013	0.0006	0.0003	0.0002	0	0.0001	Iranian
PV036	0.005	-0.0035	-0.0003	0.0004	-0.0015	0.0006	0.0005	0.0002	0	0	Iranian
PV037	0.0047	-0.0032	-0.0001	0.0005	-0.0013	0.0015	0.0018	0.0004	-0.0002	-0.0001	Iranian
PV038	0.0041	-0.0039	-0.0005	0	-0.0003	0.0009	-0.0001	0.0001	-0.001	0.0001	Iranian
ALB126	-0.002	0.0028	-0.0014	0	-0.0017	-0.001	0.0009	-0.0006	-0.0002	-0.0004	Spanish
ALB231	-0.002	0.003	-0.0015	-0.0001	-0.0006	-0.0001	-0.0001	0	0.0004	-0.0004	Spanish
ALB389	-0.0013	0.0025	-0.0013	0	-0.0013	0.0005	-0.0002	0.0001	-0.0005	0.0002	Spanish
ALE005	-0.0014	0.0027	-0.0009	0.0002	0.0004	0.0002	-0.0003	-0.0001	0	0.0001	Spanish
ALE009	-0.0015	0.0029	-0.0017	-0.0003	-0.0018	0.0012	-0.0004	0.0003	-0.0002	0.0001	Spanish
ALE088	-0.0018	0.0018	-0.0018	-0.0004	-0.0013	0.0004	0.0004	-0.0009	-0.0002	-0.0003	Spanish
ALE339	-0.0014	0.0022	-0.0015	-0.0001	0.0006	0.0003	0.0003	-0.0002	-0.0003	-0.0001	Spanish
ARM005	-0.0017	0.0028	-0.0017	-0.0001	-0.0013	0.0003	0.0001	-0.0005	0.0004	-0.0001	Spanish
BON076	-0.0017	0.0032	-0.0017	0	-0.0007	0.001	0.0003	-0.0004	0	-0.0001	Spanish
BOS010	-0.0023	0.0031	-0.0015	-0.0003	-0.0018	-0.0006	0.0008	0.0001	-0.0002	-0.0001	Spanish
BOS011	-0.002	0.0021	-0.002	-0.0006	-0.0006	0.0001	-0.0002	0	0	-0.0001	Spanish
BOS015	-0.0021	0.002	-0.0009	-0.0006	-0.0018	0.0012	-0.0006	0.0004	0.0001	-0.0004	Spanish
BOS027	-0.0016	0.0027	-0.0018	0	-0.001	-0.0003	0	0	0.0001	0	Spanish
BOS029	-0.0019	0.0028	-0.0017	-0.0001	-0.0013	0.0006	0.0002	0.0006	-0.0001	0.0004	Spanish
CAL026	-0.0016	0.0021	-0.001	-0.0001	-0.0015	-0.0012	0.0003	-0.0004	0.0001	0.0004	Spanish
CAL053	-0.0018	0.0026	-0.0022	-0.0005	-0.0017	0.0003	0.0007	-0.0002	0	-0.0001	Spanish
CAL107	-0.0022	0.0025	-0.0019	-0.0005	-0.0007	-0.001	-0.0004	-0.0003	-0.0002	-0.0001	Spanish
CAR007	-0.0015	0.0022	-0.0013	-0.0002	-0.0007	-0.0009	0.001	-0.0001	0.0004	0.0005	Spanish
CAR016	-0.002	0.0027	-0.0011	-0.0003	-0.0016	0.0004	-0.0002	-0.0001	-0.0003	-0.0005	Spanish
CAR023	-0.0021	0.0023	-0.0013	-0.0001	-0.0003	-0.0007	0.0001	-0.0001	0.0003	-0.0001	Spanish
CAR048	-0.0023	0.0024	-0.002	-0.0005	-0.0008	0.0002	0.0001	-0.0005	0.0004	-0.0003	Spanish
CAR200	-0.0021	0.0033	-0.0015	-0.0003	-0.003	0.0007	0.0002	0.0001	0	0.0002	Spanish
CAR212	-0.0011	0.0029	-0.0019	-0.0002	0.0003	0.0005	0.0003	-0.0003	0.0004	0	Spanish
CAR256	-0.0015	0.0024	-0.0016	-0.0001	-0.0012	-0.0001	-0.0001	0.0001	0.0005	0	Spanish
CAR257	-0.0014	0.0022	-0.0016	-0.0004	-0.0021	0.0007	0	0.0001	-0.0004	-0.0004	Spanish
COD068	-0.0021	0.0023	-0.0011	0	0.0008	0.0025	0.0004	-0.0002	0.0006	-0.0001	Spanish
COD147	-0.0023	0.0029	-0.0014	-0.0002	-0.0016	0.001	0.0002	-0.0005	0.0003	0.0001	Spanish
COM032	-0.002	0.0026	-0.0015	-0.0004	-0.0016	0.0011	0.0001	0.0002	0.0008	0	Spanish
DAN072	-0.0021	0.0023	-0.0016	-0.0001	-0.0009	-0.0009	0.0002	-0.0005	0.0008	-0.0004	Spanish
EST038	-0.0019	0.0028	-0.0019	-0.0005	-0.0005	0.0011	0.0002	0.0003	0.0009	-0.0003	Spanish
EST093	-0.0017	0.0028	-0.0015	-0.0001	-0.0024	0.0009	0.0003	-0.0004	0.0001	0.0001	Spanish
FER007	-0.0018	0.0024	-0.0017	-0.0004	-0.001	0.0003	0.0001	-0.0001	0	0.0001	Spanish
FER015	-0.0018	0.0028	-0.001	-0.0003	-0.0007	0.0011	0.0007	-0.0001	-0.0003	-0.0002	Spanish
FER023	-0.0013	0.0034	-0.0016	0.0003	-0.0024	0.0005	0.0003	-0.0004	0.0003	0.0002	Spanish
FER033	-0.0023	0.0032	-0.0013	0	-0.0005	0.001	0.0003	0.0001	-0.0001	-0.0001	Spanish
FER039	-0.0019	0.0028	-0.0018	-0.0002	-0.0012	-0.0002	0.0001	0	0.0002	-0.0003	Spanish
FER052	-0.0016	0.0031	-0.0018	-0.0006	-0.0016	-0.0008	0	-0.0004	-0.0005	-0.0001	Spanish
FER054	-0.0012	0.0028	-0.0011	0	0.0002	0.0001	0.0004	0	0.0001	0.0002	Spanish
FER097	-0.0015	0.0025	-0.0014	-0.0006	-0.0025	0.0003	0.0006	0.0004	0.0003	-0.0004	Spanish
FER101	-0.0023	0.003	-0.0011	-0.0003	-0.001	0.0003	0.0005	0.0002	0.0002	-0.0001	Spanish
FOR066	-0.0021	0.0029	-0.0016	-0.0002	0.0004	0.0001	0.0007	-0.0002	0.0004	-0.0001	Spanish
FOR067	-0.0018	0.0025	-0.0011	0	-0.0014	-0.0003	0.0003	0.0002	0.0002	-0.0002	Spanish
FOR094	-0.0011	0.0022	-0.0014	-0.0001	-0.0013	0	0	0.0003	0	0.0008	Spanish
GRA011	-0.0021	0.0028	-0.0011	-0.0003	-0.0013	-0.0006	0.0001	0	0.0003	0.0002	Spanish
GRA016	-0.0018	0.0026	-0.0012	-0.0003	-0.0009	-0.0009	0.0005	0.0003	-0.0007	0.0002	Spanish
GRA020	-0.0019	0.0028	-0.002	-0.0003	-0.0033	-0.0001	0	0.0002	-0.0003	0.0002	Spanish
GRA029	-0.0021	0.0021	-0.0021	-0.0005	-0.0018	-0.0004	0.0005	0.0001	0.0003	-0.0003	Spanish
GRA035	-0.0023	0.0029	-0.0019	-0.0001	-0.0013	0.0008	0	0	0.0003	-0.0001	Spanish
GRA135	-0.0016	0.0023	-0.001	-0.0002	-0.0011	0.001	-0.0005	-0.0001	-0.0005	-0.0003	Spanish
GUL190	-0.002	0.002	-0.0008	-0.0007	-0.0003	-0.0003	0.0011	-0.0002	0.0001	-0.0001	Spanish
GUS007	-0.0012	0.0025	-0.0016	-0.0002	0.0015	0.0004	-0.0002	-0.0003	-0.0003	-0.0003	Spanish
GUS008	-0.0015	0.0025	-0.0014	-0.0005	-0.0017	-0.0006	0.0002	-0.0001	0.0003	0	Spanish
GUS014	-0.002	0.002	-0.001	-0.0002	-0.0013	-0.0001	-0.0001	0	0.0005	0.0004	Spanish
GUS029	-0.0015	0.0023	-0.0017	-0.0006	-0.0011	0.0004	0.0004	0.0006	-0.0008	-0.0003	Spanish
GUS036	-0.0018	0.0024	-0.0017	-0.0003	0.0009	0	0.0005	0.0002	0.0004	0.0002	Spanish
GUS040	-0.0019	0.0028	-0.0016	-0.0001	-0.0006	-0.0002	-0.0002	0.0004	0.0003	0.0002	Spanish
GUS119	-0.0017	0.0023	-0.0011	0.0001	-0.0008	0.0006	-0.0001	0.0001	-0.0001	0.0006	Spanish
GUS199	-0.0014	0.0024	-0.0018	-0.0003	-0.0022	0.0001	0.0003	-0.0005	-0.0002	0.0007	Spanish
GUS202	-0.0021	0.0022	-0.0013	-0.0004	-0.0022	0	0.0005	0.0001	0	0	Spanish
GUS203	-0.0014	0.0023	-0.0011	-0.0003	-0.0014	0.0007	0.0006	-0.0002	0.0002	-0.0001	Spanish
MAS003	-0.0019	0.0028	-0.0007	0.0003	-0.0032	0.0004	-0.0006	-0.0001	-0.0001	0.0003	Spanish
MAS016	-0.0021	0.0019	-0.0014	-0.0004	-0.0008	-0.0003	0.0004	-0.0002	-0.0001	-0.0002	Spanish
MAS064	-0.0012	0.0028	-0.0016	-0.0002	-0.0005	0.0004	0	-0.0004	0.0004	-0.0002	Spanish
MAY035	-0.0018	0.0026	-0.0019	-0.0003	0.0012	0.0004	-0.0003	0.0007	-0.0001	0.0003	Spanish
MEL022	-0.0014	0.0025	-0.0017	-0.0003	-0.0001	0.0002	-0.0002	0.0001	0	-0.0001	Spanish
MIQ133	-0.0021	0.0015	-0.0017	-0.0003	-0.0014	0.0004	-0.0001	-0.0003	-0.0001	0.0003	Spanish
MOR061	-0.0018	0.002	-0.0018	-0.0002	-0.0013	-0.0001	0.0002	-0.0003	-0.0002	0.0001	Spanish
MOR068	-0.0022	0.0023	-0.0012	0.0001	-0.0003	0.0005	-0.0003	0.0001	0.0002	0.0002	Spanish
MST073	-0.0023	0.002	-0.0015	-0.0002	-0.0007	-0.0004	0	-0.0004	-0.0005	0.0003	Spanish
MST075	-0.0024	0.0025	-0.0017	-0.0001	-0.0015	0.0004	0.0003	-0.0002	0.0002	0.0003	Spanish
NAC135	-0.0017	0.0029	-0.0012	-0.0002	-0.0022	0.0005	-0.0001	0.0002	0.0002	0.0001	Spanish
PIT001	-0.0016	0.0029	-0.002	-0.0003	0.0002	0.001	-0.0001	-0.0007	0.0002	0.0004	Spanish
PON058	-0.0018	0.0022	-0.0017	-0.0003	-0.0014	0.0006	0.0001	0.0004	-0.0002	-0.0003	Spanish
RAG111	-0.0016	0.003	-0.0018	-0.0003	-0.0021	-0.0009	-0.0006	0.0003	0.0005	-0.0004	Spanish
REI087	-0.0022	0.0027	-0.0016	-0.0003	-0.0004	0.001	-0.0005	-0.0002	-0.0002	-0.0001	Spanish
RIC076	-0.0022	0.0026	-0.002	-0.0005	-0.0002	0.001	0.0006	-0.0004	-0.0001	0.0002	Spanish
RIC106	-0.0017	0.0021	-0.0013	-0.0004	-0.0003	0.0004	0.0003	0	-0.0001	0.0002	Spanish
ROB016	-0.0017	0.0015	-0.0018	-0.0003	-0.0005	-0.0004	0.0007	-0.0005	-0.0002	-0.0005	Spanish
ROB116	-0.002	0.0026	-0.0023	-0.0003	-0.0016	0.0005	-0.0001	-0.0002	0.0003	0.0001	Spanish
ROB127	-0.0019	0.0024	-0.0014	-0.0003	-0.002	0.001	0.0004	-0.0006	-0.0001	0.0003	Spanish
ROI027	-0.0016	0.0024	-0.0017	-0.0007	-0.0005	-0.0003	0.0005	-0.0001	0.0001	0.0001	Spanish
ROI042	-0.002	0.0024	-0.0017	-0.0004	-0.0007	0.0014	0.0006	0	0	-0.0006	Spanish
ROI096	-0.0014	0.0023	-0.0014	-0.0002	0.0006	0.0004	0.0008	0	-0.0005	0.0002	Spanish
ROS005	-0.0022	0.0029	-0.0015	-0.0001	0.0004	0	0.0004	-0.0001	-0.0006	-0.0003	Spanish
ROS008	-0.0018	0.0031	-0.0018	-0.0003	-0.0001	0	-0.0003	-0.0002	-0.0008	-0.0006	Spanish
ROS025	-0.002	0.0023	-0.0014	-0.0008	-0.0017	-0.0006	0.0002	0.0001	-0.0001	-0.0002	Spanish
SAB009	-0.0013	0.0022	-0.0014	-0.0001	-0.0019	-0.0009	0.0002	-0.0002	-0.0004	-0.0004	Spanish
SAB014	-0.0021	0.0027	-0.0016	-0.0003	-0.0002	0.0004	0	-0.0007	0	0	Spanish
SAB019	-0.0017	0.0025	-0.0019	-0.0002	-0.0011	-0.0003	0.0001	-0.0001	-0.0003	0.0002	Spanish
SAB131	-0.0016	0.0029	-0.0016	-0.0002	-0.0024	0.0003	0.0004	-0.0001	0.0004	-0.0007	Spanish
SAB137	-0.0022	0.0025	-0.0021	-0.0007	-0.0022	0.0003	0	-0.0002	0.0006	-0.0003	Spanish
SER011	-0.002	0.0026	-0.0007	-0.0004	-0.0016	0.0007	0.001	0.0001	-0.0003	-0.0003	Spanish
SER015	-0.002	0.0023	-0.0018	-0.0004	0	0.0006	0.0001	-0.0003	0.0003	0	Spanish
SER018	-0.0022	0.0019	-0.0012	-0.0002	-0.0012	-0.0005	0.0001	0.0004	0.0002	0.0005	Spanish
SER022	-0.0022	0.0022	-0.001	-0.0003	0.0004	0.001	0.0002	0.0001	-0.0004	-0.0004	Spanish
SER027	-0.0022	0.0026	-0.0013	-0.0001	-0.0012	0.0005	-0.0002	0.0002	0.0004	0.0006	Spanish
SER064	-0.0016	0.0024	-0.0017	-0.0001	-0.0007	0.0016	0.0003	-0.0003	0	0.0004	Spanish
SLA017	-0.0014	0.0032	-0.0017	-0.0006	-0.0006	0.0004	-0.0002	-0.0002	0	-0.0001	Spanish
SLM078	-0.0019	0.0024	-0.0014	-0.0003	-0.0001	0.0008	-0.0002	0.0003	0.0009	-0.0002	Spanish
SOL051	-0.0017	0.0026	-0.0016	-0.0002	-0.0026	0	0.0009	0.0001	0.0006	0.0001	Spanish
SOL053	-0.0017	0.0025	-0.0015	-0.0002	-0.0014	0.0007	0	-0.0003	-0.0003	0.0003	Spanish
SOL083	-0.0022	0.0023	-0.0014	-0.0006	-0.0001	-0.0008	0.0005	0	0.0005	0	Spanish
SOL084	-0.0016	0.0028	-0.0015	-0.0002	-0.0014	0.0009	0.0005	0.0007	0.0001	0	Spanish
STC091	-0.0022	0.0027	-0.0012	-0.0006	-0.0006	0.0006	0.0004	-0.0008	0.0002	-0.0003	Spanish
VID003	-0.002	0.0022	-0.0013	-0.0002	-0.002	-0.0004	0.0006	0	-0.0001	-0.0003	Spanish
VID014	-0.0024	0.0026	-0.0016	-0.0002	-0.0011	0.0016	0.0001	-0.0005	0.0005	-0.0001	Spanish
VID016	-0.0027	0.0021	-0.001	-0.0002	0.0002	0.0006	0.0006	-0.0001	0.0001	-0.0002	Spanish
VID037	-0.0025	0.0025	-0.0018	-0.0004	-0.0016	-0.0004	-0.0007	0.0002	-0.0001	0.0003	Spanish
VID044	-0.0021	0.0022	-0.0019	-0.0005	-0.0014	0.0001	0.0002	-0.0001	0.0006	-0.0002	Spanish
VID048	-0.0021	0.0028	-0.0015	-0.0004	-0.0029	0.0001	0.0008	-0.0005	0.0002	0.0002	Spanish
VID057	-0.0022	0.0028	-0.0015	-0.0001	0.0001	-0.001	-0.0005	0.0001	0	-0.0003	Spanish
EIV009_2	-0.0017	0.0025	-0.0012	0	-0.0011	0.0003	-0.0001	0	0	-0.0002	Spanish
EIV010_2	-0.0015	0.0025	-0.0016	0	-0.0003	-0.0003	0.0001	-0.0001	0.0008	0.0001	Spanish
EIV011_2	-0.0017	0.0028	-0.0011	-0.0002	-0.0017	0.0011	0.0002	-0.0009	0	0.0001	Spanish
EIV001_2	-0.0009	0.0028	-0.0025	-0.0003	-0.0016	-0.0006	0.0006	0.0009	0.0005	-0.0001	Spanish
EIV004_2	-0.0015	0.0024	-0.0018	-0.0001	-0.0011	0.0009	0	-0.0002	0.0006	-0.0001	Spanish
EIV012_2	-0.0016	0.0032	-0.0013	-0.0002	0.0003	0.0004	0	0.0004	0.0005	0.0003	Spanish
EIV013_2	-0.0018	0.0027	-0.0015	-0.0002	-0.0007	0.0011	0.0002	-0.0002	-0.0009	0.0007	Spanish
EIV014_2	-0.0016	0.0028	-0.0015	-0.0002	-0.0015	0.0012	0	-0.0003	-0.0003	0.0008	Spanish
EIV015_2	-0.0019	0.0031	-0.0014	-0.0004	-0.0011	-0.0002	0	0.0002	0.0004	0	Spanish
S_Polish-1.DG	-0.0039	-0.0009	0.0023	0.0008	0.0021	-0.0012	0.0002	-0.0002	-0.0003	0.0002	Polish.DG
S_North_Ossetian-1.DG	0.0023	-0.0053	-0.0011	-0.0014	-0.0055	0.0009	-0.0001	-0.0004	0.0002	-0.0002	Russia_NorthOssetian.DG
S_North_Ossetian-2.DG	0.0023	-0.005	-0.0011	-0.001	-0.0033	0.0016	-0.0001	-0.0008	-0.0001	0.0001	Russia_NorthOssetian.DG
NA20502.SG	0.0002	0.0012	-0.0021	-0.0006	0.0004	-0.0003	0	-0.0003	0.0007	-0.0001	TSI.SG
NA20503.SG	0.0001	0.0011	-0.0015	-0.0003	0.0024	-0.0007	-0.0001	-0.0001	-0.0007	0.0002	TSI.SG
NA20504.SG	0.0001	0.0009	-0.002	-0.0004	-0.001	-0.0003	-0.0001	-0.0011	-0.0005	0.0005	TSI.SG
NA20505.SG	-0.0003	0.0015	-0.0022	-0.0005	-0.0006	-0.0004	-0.0006	-0.0001	-0.0004	0.0002	TSI.SG
NA20506.SG	0.0003	0.001	-0.0014	0	0.0008	0.0002	0.0002	-0.0005	-0.0003	0.0005	TSI.SG
NA20507.SG	0	0.0013	-0.0019	-0.0003	-0.0003	-0.0004	-0.0005	0.0002	0.0004	0.0004	TSI.SG
NA20508.SG	-0.0001	0.0008	-0.0022	-0.0004	0.0011	-0.0007	0	-0.0004	-0.0005	0.0001	TSI.SG
NA20509.SG	0.0002	0.002	-0.0022	0	-0.0003	-0.0008	-0.0001	0.0002	0.0003	0.0003	TSI.SG
NA20510.SG	-0.0002	0.0013	-0.0016	-0.0003	-0.0012	0.0002	-0.0002	0	-0.0003	-0.0002	TSI.SG
NA20511.SG	-0.0005	0.001	-0.0018	-0.0006	-0.0004	-0.0009	0.0003	-0.0003	-0.0007	-0.0001	TSI.SG
NA20512.SG	0.0003	0.0014	-0.0022	-0.0004	-0.001	0.0003	-0.0005	-0.0005	0.0007	0.0003	TSI.SG
NA20513.SG	0.0004	0.0009	-0.0022	-0.0007	0.0008	0.0002	0	0.0004	0.0001	0.0003	TSI.SG
NA20514.SG	-0.0001	0.0013	-0.002	-0.0005	-0.0016	-0.0007	-0.0005	0.0015	-0.0003	0	TSI.SG
NA20515.SG	-0.0004	0.0011	-0.0019	-0.0003	-0.0015	0.0002	-0.0005	-0.0001	0.0003	0.0001	TSI.SG
NA20516.SG	-0.0002	0.0012	-0.0017	-0.0009	0.0007	-0.0004	-0.0001	0.0005	0.0012	0.0002	TSI.SG
NA20517.SG	-0.0005	0.0015	-0.0019	-0.0006	0.0006	0.0011	-0.0004	-0.0005	-0.0001	0.0002	TSI.SG
NA20518.SG	-0.0006	0.0012	-0.0015	-0.0003	0.0005	-0.0021	0	0.0002	0.0006	-0.0008	TSI.SG
NA20519.SG	-0.0002	0.0012	-0.0021	-0.0003	0.001	-0.0009	0.0001	0.0001	-0.0002	0.0008	TSI.SG
NA20520.SG	-0.0002	0.0014	-0.0019	-0.0001	0.0023	0.0001	0.0001	0	-0.0002	0.001	TSI.SG
NA20521.SG	-0.0001	0.0014	-0.0014	-0.0004	0.0004	0.0004	-0.0003	0	-0.0005	-0.0006	TSI.SG
NA20522.SG	-0.0003	0.0013	-0.0015	-0.0001	0.0001	0.001	0.0005	-0.0008	0.0005	0	TSI.SG
NA20524.SG	-0.0008	0.001	-0.0016	-0.0006	0.0013	-0.0002	-0.0003	0.0005	-0.0001	0	TSI.SG
NA20525.SG	-0.0001	0.0015	-0.0019	-0.0002	0.001	-0.0006	-0.0006	-0.0005	0	-0.0001	TSI.SG
NA20526.SG	-0.0003	0.0013	-0.0024	-0.0002	0.001	-0.002	-0.0007	0	-0.0002	0	TSI.SG
NA20527.SG	-0.0004	0.0019	-0.0018	-0.0002	0.0001	-0.001	-0.0005	0.0004	-0.0001	-0.0004	TSI.SG
NA20528.SG	-0.0001	0.0009	-0.0015	-0.0004	0.0002	-0.001	-0.0001	-0.0005	-0.0004	0.0001	TSI.SG
NA20529.SG	0.0002	0.0015	-0.0021	-0.0004	0.0003	-0.0004	0.0001	-0.0001	0.0009	0.0001	TSI.SG
NA20530.SG	-0.0005	0.002	-0.0019	-0.0004	-0.0007	0.0001	0.0004	-0.0002	0.0005	0.0008	TSI.SG
NA20531.SG	-0.0001	0.0014	-0.0022	-0.0003	-0.0005	-0.0006	-0.0004	0.0004	0	-0.0002	TSI.SG
NA20532.SG	0.0002	0.0015	-0.002	-0.0004	-0.0001	-0.0002	-0.0003	0.0003	-0.0004	-0.0005	TSI.SG
NA20533.SG	-0.0002	0.0014	-0.0024	0	0.0017	0.0003	0.0005	0.0004	0.0001	0.0006	TSI.SG
NA20534.SG	0.0001	0.0013	-0.002	-0.0006	-0.0012	-0.0014	0.0003	-0.0002	-0.0006	0.0003	TSI.SG
NA20535.SG	-0.0003	0.0013	-0.0016	-0.0003	0.0001	-0.001	0.0001	0.0001	-0.0001	-0.0003	TSI.SG
NA20536.SG	-0.0002	0.0011	-0.0011	-0.0002	0.0017	-0.0011	-0.0002	-0.0001	-0.0006	0	TSI.SG
NA20538.SG	-0.0001	0.0019	-0.0015	-0.0003	0.0018	0.0001	-0.0005	0.0001	0	0.0005	TSI.SG
NA20539.SG	0.0001	0.0012	-0.0017	-0.0007	0.0018	-0.0009	-0.0008	-0.0006	-0.0005	0.0002	TSI.SG
NA20540.SG	-0.0003	0.0015	-0.0019	-0.0005	0.0002	0.0009	0	0.0006	-0.0003	0	TSI.SG
NA20541.SG	-0.0004	0.0016	-0.002	-0.0002	-0.0013	-0.0003	0.0006	-0.0002	-0.0001	0.0002	TSI.SG
NA20542.SG	-0.0003	0.0013	-0.0024	-0.0002	0.0003	-0.0006	-0.0002	0.0008	-0.0001	-0.0002	TSI.SG
NA20543.SG	-0.0003	0.0015	-0.0011	-0.0003	0.0004	-0.0006	0.0004	0.0002	0.0001	0.0004	TSI.SG
NA20544.SG	0	0.0013	-0.0011	-0.0006	0.0004	0.0006	0.0003	0.0003	0.0004	-0.0002	TSI.SG
NA20581.SG	-0.0001	0.0015	-0.0019	-0.0005	0.0002	0.0004	0.0003	-0.0001	0	0.0001	TSI.SG
NA20582.SG	0.0001	0.0012	-0.0018	-0.0004	-0.0012	-0.0006	-0.0003	-0.0001	0.0007	0.0004	TSI.SG
NA20585.SG	0.0002	0.0015	-0.0018	-0.0007	0.0012	0.0004	-0.0002	0.0002	0.0001	0.0001	TSI.SG
NA20586.SG	0.0002	0.0014	-0.0018	-0.0004	0.0027	-0.0008	0.0003	0.0003	0.0002	0.0003	TSI.SG
NA20587.SG	-0.0006	0.0015	-0.0016	-0.0002	0.0019	0.0004	-0.0007	0.0001	0.0003	-0.0006	TSI.SG
NA20588.SG	-0.0001	0.0015	-0.0025	-0.0005	0.0018	0.0001	0.0002	0.0002	-0.0001	-0.0003	TSI.SG
NA20589.SG	0.0001	0.0014	-0.0019	-0.0005	0.0022	-0.0009	0	0.0002	0.0001	-0.0001	TSI.SG
NA20752.SG	0	0.0015	-0.0017	-0.0008	-0.0018	0.0009	-0.0003	-0.0001	0.0003	-0.0008	TSI.SG
NA20753.SG	0.0003	0.0012	-0.0016	-0.0002	0.001	-0.0003	-0.0006	0.0004	-0.0003	0.0004	TSI.SG
NA20754.SG	0.0001	0.0009	-0.002	-0.0001	-0.0002	0.0004	-0.0001	-0.0001	-0.0004	0	TSI.SG
NA20755.SG	0.0002	0.0018	-0.002	-0.0008	0.0005	0	-0.0004	0	0.0005	0.0003	TSI.SG
NA20756.SG	0	0.0015	-0.0015	-0.0003	0.0001	-0.0004	0	0.0004	-0.0007	0.0005	TSI.SG
NA20757.SG	0.0003	0.0016	-0.0014	-0.0002	0.0004	0.0013	-0.0003	0.0001	0.0002	0	TSI.SG
NA20758.SG	0.0001	0.001	-0.0013	0.0003	0.0012	-0.0001	0.0006	0	0.0001	-0.0005	TSI.SG
NA20759.SG	0.0001	0.0012	-0.0021	-0.0004	0.0004	-0.0012	-0.0001	0.0006	0.0011	-0.0002	TSI.SG
NA20760.SG	-0.0006	0.001	-0.0011	-0.0003	0.0002	0.0004	-0.0003	0.0004	-0.0007	-0.0001	TSI.SG
NA20761.SG	-0.0005	0.0013	-0.0017	-0.0001	0.0019	0.0007	0.0001	0.0007	0.0001	0.0001	TSI.SG
NA20762.SG	-0.0002	0.0013	-0.0023	-0.0002	0.0001	0.0002	0.0002	0.0003	-0.0003	-0.0003	TSI.SG
NA20763.SG	-0.0004	0.0016	-0.0018	-0.0005	0.0007	0.0007	-0.0009	-0.0008	0.0004	-0.0001	TSI.SG
NA20764.SG	-0.0002	0.0013	-0.0017	-0.0003	0.0018	0.0009	-0.0005	-0.0003	0	0.0008	TSI.SG
NA20765.SG	-0.0002	0.0013	-0.002	-0.0007	-0.0009	-0.001	-0.0001	0.0001	-0.001	0.0002	TSI.SG
NA20766.SG	0.0004	0.0013	-0.0018	-0.0004	-0.0004	0.0004	-0.0001	-0.0002	0.0002	0.0002	TSI.SG
NA20767.SG	-0.0001	0.0016	-0.0013	0	0.0015	-0.0004	-0.0008	0.001	0.0013	-0.0008	TSI.SG
NA20768.SG	-0.0005	0.0014	-0.0021	-0.0003	0	-0.0005	-0.0006	0.0001	-0.0003	-0.0002	TSI.SG
NA20769.SG	0	0.0011	-0.0017	-0.0004	-0.0005	-0.0009	-0.0009	-0.0003	-0.0001	-0.0005	TSI.SG
NA20770.SG	0	0.0008	-0.0022	-0.0002	0.0008	-0.0004	-0.0004	-0.0001	0.0004	-0.0003	TSI.SG
NA20771.SG	0.0001	0.0014	-0.0017	-0.0005	0.0007	0.0003	0.0001	0.0001	0.0006	0.0003	TSI.SG
NA20772.SG	0.0001	0.0011	-0.0012	-0.0003	-0.0005	0.0002	-0.0005	0.0001	-0.0001	-0.0001	TSI.SG
NA20773.SG	0.0001	0.0011	-0.002	-0.0006	-0.0017	-0.0006	-0.0001	-0.0007	0.0011	0.0002	TSI.SG
NA20774.SG	0.0003	0.0015	-0.0021	-0.0002	-0.0003	0.0001	0.0004	-0.0002	0.0002	0.0002	TSI.SG
NA20775.SG	-0.0001	0.0011	-0.0015	0	0.002	0	-0.0006	-0.0005	-0.0002	0	TSI.SG
NA20778.SG	-0.0002	0.0015	-0.0018	-0.0003	0.0003	-0.0018	-0.0003	0.0001	0.0001	0.0001	TSI.SG
NA20783.SG	0.0002	0.0014	-0.0021	-0.0004	-0.0003	0.0002	0.0004	-0.0001	0.0003	0.0001	TSI.SG
NA20785.SG	-0.0003	0.001	-0.0018	-0.0001	0.0005	-0.0014	0.0004	-0.0008	-0.0001	-0.0002	TSI.SG
NA20786.SG	0.0002	0.0013	-0.0016	-0.0004	0.0009	0.0003	0.0006	0.0007	-0.0001	0	TSI.SG
NA20787.SG	0.0005	0.0014	-0.0018	-0.0006	-0.0005	-0.0008	-0.0007	-0.0003	0.0003	0.0008	TSI.SG
NA20790.SG	-0.0004	0.0012	-0.0017	-0.0006	0.001	-0.0007	-0.001	0.0001	0.0001	-0.0001	TSI.SG
NA20792.SG	-0.0001	0.0014	-0.0029	-0.0006	0.0003	-0.0019	-0.0002	0.0004	-0.0003	0.0002	TSI.SG
NA20795.SG	0.0004	0.0012	-0.0022	-0.0005	0.0021	0.0002	-0.0006	0.0001	0	-0.0001	TSI.SG
NA20796.SG	0.0001	0.0015	-0.0024	0.0002	0.0005	0.0008	-0.0008	-0.0002	-0.0007	0.0004	TSI.SG
NA20797.SG	0.0004	0.0013	-0.0019	-0.0001	0.0021	0.0001	0.0005	0	0.0006	0.0006	TSI.SG
NA20798.SG	0.0002	0.0012	-0.0019	-0.0006	-0.0005	-0.0002	0.0002	0.0001	0.0002	0.0001	TSI.SG
NA20799.SG	0.0001	0.0016	-0.0025	-0.0002	-0.0005	0.0008	-0.0005	0.0004	-0.0003	0.0002	TSI.SG
NA20800.SG	0.0001	0.0016	-0.0027	-0.0003	-0.0015	0.0002	-0.0002	-0.0006	0.0003	-0.0006	TSI.SG
NA20801.SG	-0.0001	0.0012	-0.0017	-0.0004	-0.0007	0.0006	0.0001	0.0005	0.0005	-0.0001	TSI.SG
NA20802.SG	0.0001	0.0018	-0.0021	0	0.0005	0.0004	-0.0005	0.0006	0.0005	0.0007	TSI.SG
NA20803.SG	-0.0006	0.0015	-0.0019	-0.0004	0.0005	-0.0006	-0.0001	0.0002	-0.0003	0	TSI.SG
NA20804.SG	0.0001	0.0012	-0.0021	-0.0003	0.0008	0.0004	-0.0006	0.0005	0.0003	0.0002	TSI.SG
NA20805.SG	0	0.0016	-0.0016	-0.0003	0.0003	-0.0006	-0.0004	0.0002	-0.0001	0.0004	TSI.SG
NA20806.SG	0	0.002	-0.0019	-0.0004	0.0014	-0.0008	-0.0004	0.0001	0.0002	0.0005	TSI.SG
NA20807.SG	0	0.001	-0.0025	-0.0004	-0.0002	-0.0015	-0.0002	0.0004	0.0004	0.0007	TSI.SG
NA20808.SG	-0.0001	0.0016	-0.0023	-0.0002	0.0004	-0.0001	-0.0006	0	0.0001	0.0009	TSI.SG
NA20809.SG	0	0.0015	-0.0016	-0.0002	0.0006	-0.0001	-0.0005	-0.0008	0.0006	0.0003	TSI.SG
NA20810.SG	-0.0001	0.0013	-0.0017	-0.0005	0.0017	-0.0007	-0.0001	0	0.001	-0.0002	TSI.SG
NA20811.SG	-0.0001	0.001	-0.0012	-0.0003	0.0023	0.0009	-0.0002	0	0.0004	-0.0002	TSI.SG
NA20812.SG	-0.0001	0.0009	-0.0019	-0.0003	0.0005	-0.0001	-0.0002	-0.0002	-0.0004	0.0004	TSI.SG
NA20813.SG	0	0.0011	-0.002	-0.0001	0.0006	-0.0005	-0.0007	0.0004	-0.0004	0.0004	TSI.SG
NA20814.SG	0	0.0014	-0.0013	-0.0005	0.0002	0	-0.0004	-0.0005	0.0002	0.0004	TSI.SG
NA20815.SG	0.0002	0.0019	-0.0013	0	0.0009	-0.0006	-0.0005	0.0001	0.0005	0.0003	TSI.SG
NA20818.SG	0	0.001	-0.0013	-0.0008	0.001	-0.0005	0.0002	0	0.0003	0	TSI.SG
NA20819.SG	-0.0001	0.0009	-0.0015	-0.0004	0.0001	-0.0007	-0.0001	-0.0009	0.0005	-0.0005	TSI.SG
NA20821.SG	0.0004	0.0013	-0.0019	-0.0005	-0.0002	-0.0002	-0.0005	-0.0004	0.0004	0	TSI.SG
NA20822.SG	0.0001	0.0014	-0.0023	-0.0002	0.0002	-0.0003	-0.0004	0	-0.0002	0.0002	TSI.SG
NA20826.SG	-0.0004	0.0016	-0.0015	-0.0002	-0.0001	-0.0007	0.0004	0.0006	0.0001	0	TSI.SG
NA20827.SG	0.0003	0.0011	-0.0016	-0.0002	0.0013	0.0004	-0.0003	0	-0.0006	0.0003	TSI.SG
NA20828.SG	0.0002	0.0013	-0.0019	-0.0005	-0.001	-0.0001	-0.0006	-0.0004	-0.0002	0.0003	TSI.SG
NA20832.SG	0	0.0017	-0.0018	-0.0001	0.0021	0.0003	-0.0004	-0.0002	-0.0008	0.0004	TSI.SG
Grotta_Mura	-0.0131	0.0057	0.0055	0.0017	-0.0016	0.0004	0.0013	-0.0002	0.0001	0.0001	Mura
Bon001.SG	0.0022	0.0049	-0.0039	0.0005	0.0018	0.002	-0.0006	-0.0009	0.0021	-0.0006	Anatolia_N
Bon002.SG	0.002	0.0048	-0.0037	0.0003	0.0015	0	-0.0013	-0.0007	-0.0011	0.0003	Anatolia_N
Bon004.SG	0.0028	0.0057	-0.0043	0.0017	0.001	0.0015	-0.0016	-0.0012	0.0016	0.0001	Anatolia_N
Bon005.SG	0.0007	0.0051	-0.0022	0.0002	0.002	0.0015	0.0004	0.0008	0.0022	-0.0003	Anatolia_N
Bar31.SG	0.0035	0.0056	-0.0033	0.0008	0.0014	0.0015	-0.0012	0.0003	0.0005	0.0012	Anatolia_N
Bar8.SG	0.0026	0.0052	-0.0036	0.0005	0.0032	0.0011	-0.0005	-0.0001	0.0009	-0.0001	Anatolia_N
GoyetQ116-1_published	-0.0005	-0.0001	0.0049	0.0027	-0.0031	0.0029	0.0012	-0.0008	0.0002	0.0001	GoyetQ116_1
Paglicci133_published	0.0017	0.0024	0.0045	0.0051	-0.0028	0.0015	0.0004	0.0011	0.0013	-0.001	Vestonice_cluster
GoyetQ-2	-0.0045	0.002	0.0049	0.0032	-0.004	0.0042	-0.0012	-0.0021	0.0005	-0.0012	GoyetQ2
Iboussieres31-2	-0.0103	0.0041	0.0066	0.0024	0.0027	0.0034	-0.0003	-0.001	-0.0007	-0.0001	WHG
Rochedane	-0.0111	0.0048	0.005	0.0027	-0.0007	-0.0002	0.0008	0.0012	0.0013	-0.0005	WHG
I0001	-0.0129	0.0046	0.0064	0.0014	-0.0003	0.0005	0.0006	0.0004	-0.0004	-0.0001	WHG
I0124	-0.0077	-0.0053	0.0083	0.0015	-0.0035	0.0012	0.0007	0	-0.0003	0.0006	EHG
I0211	-0.0091	-0.0049	0.0095	0.0022	-0.001	-0.001	0.0014	-0.0005	-0.0012	0	EHG
I1100	0.0022	0.006	-0.0045	-0.0005	0.002	-0.0021	-0.0008	-0.0005	-0.0006	0	Anatolia_N
I1102	0.0027	0.0054	-0.0045	0	0.0072	-0.0005	-0.0017	-0.0001	-0.0003	0.0005	Anatolia_N
I1099	0.0024	0.0053	-0.0046	0.0001	0.0051	0.0007	-0.0017	0.0008	0.0008	-0.0002	Anatolia_N
I1103	0.0031	0.0046	-0.004	0.0004	0.0031	0.0002	-0.0009	0.0001	0.0008	0.0001	Anatolia_N
I1101	0.0027	0.0058	-0.0042	0.0001	0.0029	0	-0.0008	-0.0004	-0.0004	0.0006	Anatolia_N
I1097	0.0025	0.0057	-0.0049	0	0.0022	0	-0.0014	-0.001	-0.0002	0.0006	Anatolia_N
I0744	0.0029	0.0055	-0.0047	0	0.0044	-0.0008	-0.0015	-0.0004	-0.0002	0.0006	Anatolia_N
I1096	0.0024	0.0055	-0.0043	0.0003	0.0035	-0.0003	-0.0011	0.0002	-0.0002	0.0001	Anatolia_N
I1098	0.0026	0.0051	-0.0043	-0.0001	0.0041	0.0002	-0.0008	-0.0005	-0.0014	0.0006	Anatolia_N
I0708	0.0029	0.004	-0.0042	0.0001	0.0026	0.0009	-0.0004	-0.0005	-0.0003	0.0005	Anatolia_N
I0745	0.0026	0.0053	-0.004	0	0.0018	-0.0008	-0.0012	-0.0002	-0.0006	0.0007	Anatolia_N
I0746	0.0026	0.005	-0.0045	-0.0002	0.0014	-0.0009	-0.0011	0.0009	-0.0004	0.0003	Anatolia_N
I0707	0.0028	0.0056	-0.005	-0.0005	0.0039	-0.0002	-0.0004	-0.001	0.0003	0.0005	Anatolia_N
I0709	0.0025	0.0057	-0.0049	0	0.0024	0.001	-0.001	-0.0001	0.0002	0.0007	Anatolia_N
I0736	0.0026	0.0054	-0.0044	-0.0004	0.0036	-0.0003	-0.0001	-0.0003	0.0001	0.0005	Anatolia_N
MA1.SG	-0.0034	-0.0085	0.008	0.0018	-0.0024	0.0018	-0.0003	0.0009	-0.0007	0.0002	Malta
LaBrana1_published.SG	-0.0098	0.0032	0.0057	0.0018	-0.0018	0.0016	0.0016	0.0002	0.0005	-0.0004	WHG
I0726	0.0022	0.0057	-0.0053	-0.0004	0.0025	0.0004	-0.0004	-0.0002	0.0006	0.0016	Anatolia_N
Villabruna	-0.0106	0.0054	0.0075	0.0035	-0.0017	0.0035	-0.0003	-0.0009	-0.0005	-0.0003	Villabruna_cluster
Vestonice16	-0.0016	0.0001	0.0038	0.002	-0.0013	0.004	0.0003	0.0005	0.0002	0	Vestonice_cluster
Vestonice13_d	-0.0008	-0.0007	0.0041	0.0031	-0.0026	0.0042	-0.0006	0.0009	0.0004	-0.002	Vestonice_cluster
Vestonice43_d	-0.003	0.0007	0.0044	0.0024	0.0023	0.002	-0.0007	0.0001	0.0002	-0.0004	Vestonice_cluster
Ostuni1_d	-0.0018	0.0003	0.0044	0.0024	-0.0015	0.0035	0.0005	0.0009	-0.0002	0.0018	Vestonice_cluster
ElMiron_d	-0.0065	0.0029	0.0042	0.002	-0.0016	0.0027	0.0009	0.0003	-0.0002	0.0005	ElMiron
AfontovaGora3_d	-0.0043	-0.0083	0.0102	0.004	-0.0077	0.0033	0.0005	-0.0035	0.0002	-0.0004	AfontovaGora3
I1577	-0.0021	0.0006	0.0052	0.0028	0.0007	0.0021	-0.0007	0.0006	0.0012	-0.0012	Vestonice_cluster
Bichon.SG	-0.0123	0.0044	0.0053	0.0019	-0.0029	0.001	0.0005	-0.0002	-0.0001	-0.0004	WHG
KK1.SG	0.0049	-0.0087	-0.0015	-0.0025	-0.0105	0.0025	0.0006	-0.0003	0.0006	-0.0013	CHG
SATP.SG	0.0052	-0.0091	-0.0008	-0.0013	-0.0098	0.0037	0	-0.0008	0.0006	0.0002	CHG
Canes.SG	-0.0099	0.0037	0.0061	0.0025	-0.0017	0.0017	0.0016	-0.0001	0.0003	-0.0003	WHG
Chan.SG	-0.0082	0.0036	0.0046	0.002	-0.0026	0.001	0.0016	-0.0002	0.0004	-0.0004	WHG
Chaudardes1_published_d	-0.0107	0.0058	0.006	0.0054	-0.0044	-0.0007	-0.0005	0.001	-0.0007	0.0015	WHG
Ranchot88_published_d	-0.0104	0.006	0.0073	0.0039	-0.0022	0.0027	0.0015	-0.0007	-0.0011	0.0008	WHG
Popovo2	-0.0082	-0.0043	0.0079	0.0034	0.0018	0.0016	0.003	-0.001	-0.0005	-0.0007	EHG
UzOO77	-0.0083	-0.0058	0.0092	0.0013	-0.0022	0.0005	0.0005	0.0006	0	0.0001	EHG
Sidelkino.SG	-0.0079	-0.0044	0.009	0.0024	-0.0027	0.0014	0	-0.0004	0.0004	0.0006	EHG
I1583.SG	0.0026	0.0059	-0.0045	-0.0001	0.004	0.0005	-0.0012	-0.001	0.0002	0.0004	Anatolia_N
ZHAG_BON004.A0101_Luk10	0.0012	0.0045	-0.0043	-0.0004	0.0041	-0.0007	-0.0001	-0.0002	0.0004	0.001	Anatolia_N
ZHAJ_BON034.A0101_Luk9	0.001	0.005	-0.0035	-0.0006	0.0017	-0.0018	-0.0008	0.0002	0	0.0002	Anatolia_N
ZHJ_BON024.A0101_Luk84	0.0009	0.0043	-0.0046	0.0001	0.0018	-0.0003	-0.0005	-0.0002	0.0004	-0.0003	Anatolia_N
ZKO_BON001.A0101_Luk7	0.0012	0.0048	-0.004	-0.0007	0.0001	-0.0001	-0.0012	-0.0002	-0.0012	0.0005	Anatolia_N
ZMOJ_BON014.A0101_Luk21	0.0018	0.0045	-0.0038	-0.0001	0.0045	0.0002	-0.0017	-0.0009	0.0004	0.0012	Anatolia_N
R11.SG	-0.013	0.0055	0.0049	0.0017	-0.002	0.0015	0.0012	0	-0.0008	-0.0003	Villabruna_cluster
R15.SG	-0.0135	0.0059	0.0059	0.0015	-0.0016	-0.0001	0.0009	-0.0009	-0.0001	-0.0004	Villabruna_cluster
R7.SG	-0.0133	0.0055	0.0054	0.0014	-0.0021	0.0013	0.0017	-0.0003	0	-0.0011	Villabruna_cluster
UZZ096	-0.0127	0.0054	0.0048	0.001	0.0007	0.0019	-0.0001	-0.0012	0.0006	0.0004	Villabruna_cluster
I2158_v2	-0.0124	0.0054	0.0054	0.0017	-0.0003	0.0018	0.0004	-0.0022	0.0013	-0.0002	Villabruna_cluster
UZZ5054	-0.0129	0.0056	0.005	0.001	-0.0019	0.0004	0.0012	0.0003	-0.0003	0.0001	Villabruna_cluster
Italy_SanTeodoro001.A0101	-0.0118	0.0053	0.0059	0.0015	-0.002	0.001	0.0001	0	0.0007	-0.0001	Villabruna_cluster
Italy_AreneCandide16	-0.0134	0.0053	0.0057	0.0015	-0.0008	0.0003	0.002	-0.0005	0.0002	-0.0001	Villabruna_cluster
Italy_Paglicci12	-0.0022	-0.0002	0.0045	0.0016	0.0032	0.0037	0.0009	0	0.0005	-0.0003	Vestonice_cluster
Italy_GrottaPradis001.A0101	-0.0113	0.0034	0.0053	0.0011	0.0022	0.002	0.0011	-0.0003	0	-0.0012	Villabruna_cluster
Italy_Tagliente2001.A0101	-0.0131	0.004	0.0058	0.0012	0	0	0.0004	-0.0002	0.0002	-0.0005	Villabruna_cluster
Italy_SanTeodoro3	-0.0108	0.0055	0.0056	0.0021	-0.0008	0.0015	0.001	-0.0005	0.0003	0.0005	Villabruna_cluster
Italy_SanTeodoro5	-0.0104	0.0051	0.0069	0.0027	-0.0041	-0.0028	-0.0007	0.0009	-0.0016	0.001	Villabruna_cluster

## Sheet: Figure S7
Supplementary Figure 7: Shared genetic drift between Le Mura 1 and other ancient samples using outgroup f3-statistics
COLUMN	DESCRIPTION
PopA	First population: Le Mura 1
PopB	Second population
Outgroup	Outgroup population: Mbuti.SDG
F3	Value of f3-statistics
SE	Standard error
Z	Z-score
#SNPs	Number of SNPs that all populations have data
PopA	PopB (X)	Outgroup	F3	SE	Z	#SNPs
Le Mura 1	Italy_Uzzo_EM	Mbuti.SDG	0,426653	0,003932	108514	549130
Le Mura 1	Italy_OrienteC	Mbuti.SDG	0,421132	0,004453	94579	201205
Le Mura 1	Italy_SanTeodoro	Mbuti.SDG	0,417099	0,003915	106535	696895
Le Mura 1	Italy_AreneCandide16	Mbuti.SDG	0,414437	0,003964	104551	578066
Le Mura 1	Italy_Continenza	Mbuti.SDG	0,413124	0,003365	122781	806251
Le Mura 1	Italy_Tagliente2	Mbuti.SDG	0,391693	0,003818	102582	346684
Le Mura 1	Switzerland_Bichon	Mbuti.SDG	0,383171	0,003856	99,36	794654
Le Mura 1	Italy_Villabruna	Mbuti.SDG	0,382856	0,003868	98971	619389
Le Mura 1	France_Ranchot88	Mbuti.SDG	0,372713	0,004012	92905	272932
Le Mura 1	Croatia_Mesolithic_HG	Mbuti.SDG	0,372287	0,004255	87,49	258364
Le Mura 1	France_Chaudardes	Mbuti.SDG	0,371196	0,004908	75635	60850
Le Mura 1	Germany_Falkenstein	Mbuti.SDG	0,368085	0,004319	85231	125488
Le Mura 1	France_Rochedane	Mbuti.SDG	0,365773	0,00451	81094	100690
Le Mura 1	France_Iboussieres31_2	Mbuti.SDG	0,362771	0,005165	70239	55851
Le Mura 1	Luxembourg_Loschbour	Mbuti.SDG	0,3593	0,003793	94734	317613
Le Mura 1	Italy_GrottaPradis	Mbuti.SDG	0,357941	0,004191	85408	163925
Le Mura 1	Spain_HG	Mbuti.SDG	0,347632	0,003139	110737	746959
Le Mura 1	Hungary_EN_HG_Koros	Mbuti.SDG	0,346837	0,003568	97207	545227
Le Mura 1	Spain_LaBraña	Mbuti.SDG	0,344698	0,003357	102675	737274
Le Mura 1	Serbia_IronGates_Mesolithic	Mbuti.SDG	0,342399	0,002856	119881	863825
Le Mura 1	Latvia_HG	Mbuti.SDG	0,335573	0,002868	117022	800307
Le Mura 1	Romania_IronGates_Mesolithic	Mbuti.SDG	0,335139	0,003049	109909	810278
Le Mura 1	Sweden_Motala_HG	Mbuti.SDG	0,319733	0,003	106585	751656
Le Mura 1	Spain_ElMiron	Mbuti.SDG	0,318092	0,003885	81874	440348
Le Mura 1	Sweden_Mesolithic	Mbuti.SDG	0,318014	0,003058	104,01	810192
Le Mura 1	Norway_Mesolithic	Mbuti.SDG	0,306286	0,003206	95535	778400
Le Mura 1	Sweden_HG	Mbuti.SDG	0,296594	0,004306	68879	71314
Le Mura 1	Ukraine_Mesolithic	Mbuti.SDG	0,294625	0,002815	104668	682227
Le Mura 1	Belgium_UP_Magdalenian	Mbuti.SDG	0,290576	0,003563	81548	293008
Le Mura 1	Austria_KremsWA3	Mbuti.SDG	0,288224	0,004036	71405	155426
Le Mura 1	Czech_Vestonice43	Mbuti.SDG	0,286464	0,00446	64237	88636
Le Mura 1	Russia_Popovo_HG	Mbuti.SDG	0,285207	0,005432	52505	46680
Le Mura 1	Russia_HG_Karelia	Mbuti.SDG	0,284031	0,003202	88714	708412
Le Mura 1	PA12	Mbuti.SDG	0,283925	0,003419	83054	487423
Le Mura 1	Russia_Sidelkino_HG	Mbuti.SDG	0,282242	0,003251	86816	674952
Le Mura 1	Russia_EHG	Mbuti.SDG	0,281373	0,003367	83578	377476
Le Mura 1	Russia_HG_Samara	Mbuti.SDG	0,278936	0,003344	83411	330457
Le Mura 1	Italy_South_HG_Ostuni1	Mbuti.SDG	0,277996	0,003543	78459	221992
Le Mura 1	Czech_Vestonice13	Mbuti.SDG	0,276823	0,004522	61212	80090
Le Mura 1	Czech_Vestonice16	Mbuti.SDG	0,27681	0,003413	81096	514112
Le Mura 1	Italy_South_HG_Paglicci133_published	Mbuti.SDG	0,26916	0,004926	54645	52962
Le Mura 1	Belgium_UP_GoyetQ116_1_published_all	Mbuti.SDG	0,266809	0,003425	77902	539682
Le Mura 1	Russia_Sunghir1.SG	Mbuti.SDG	0,266194	0,003284	81065	555816
Le Mura 1	Germany_EN_LBK_Stuttgart	Mbuti.SDG	0,26461	0,003172	83431	804994
Le Mura 1	Russia_Kostenki14	Mbuti.SDG	0,261941	0,003233	81027	745411
Le Mura 1	Romania_Muierii	Mbuti.SDG	0,259275	0,005	51,86	56228
Le Mura 1	Russia_MA1_HG	Mbuti.SDG	0,259183	0,003254	79641	562869
Le Mura 1	Russia_AfontovaGora3	Mbuti.SDG	0,252017	0,003716	67,81	187361
Le Mura 1	Georgia_Kotias	Mbuti.SDG	0,247489	0,003028	81736	801331
Le Mura 1	Georgia_Satsurblia	Mbuti.SDG	0,242676	0,003052	79504	558710
Le Mura 1	Russia_Ust_Ishim_HG	Mbuti.SDG	0,223626	0,003059	73093	814675
Le Mura 1	Czech_Zlaty_kun	Mbuti.SDG	0,214134	0,003084	69432	470790
Le Mura 1	Romania_Oase	Mbuti.SDG	0,208998	0,00371	56332	137243

## Sheet: Figure S8 a + b
Supplementary Figure 8: Pairwise mismatch rate (PMR) between Italian Epigravettian and Mesolithic individuals
PMR values used for boxplott in case of Le Mura 1 is grouped into Group 2 and Group 3 respectevely
COLUMN	DESCRIPTION
Ind1	ID sample1
Ind2	ID sample2
pMismatch	Pairwise mismatch rate
Label	Group into which individuals are grouped
Ind1	Ind2	pMismatch	Label				Ind1	Ind2	pMismatch	Label
R11.SG	R15.SG	0.19636	Group2				STO001.A0101	UZZ096	0.18121	Group3
R11.SG	R7.SG	0.19011	Group2				STO001.A0101	I2158_v2	0.18473	Group3
R11.SG	AC16	0.19526	Group2				STO001.A0101	UZZ5054	0.17856	Group3
R15.SG	R7.SG	0.19296	Group2				STO001.A0101	STO3	0.16928	Group3
R15.SG	AC16	0.1953	Group2				STO001.A0101	STO5	0.16368	Group3
R7.SG	AC16	0.19581	Group2				STO001.A0101	Grotta_Mura	0.19303	Group3
R11.SG	Grotta_Mura	0.19649	Group2				UZZ096	I2158_v2	0.16241	Group3
R15.SG	Grotta_Mura	0.19738	Group2				UZZ096	UZZ5054	0.15585	Group3
R7.SG	Grotta_Mura	0.19567	Group2				UZZ096	STO3	0.16832	Group3
AC16	Grotta_Mura	0.19242	Group2				UZZ096	STO5	0.15694	Group3
STO001.A0101	UZZ096	0.18121	Group3				UZZ096	Grotta_Mura	0.18827	Group3
STO001.A0101	I2158_v2	0.18473	Group3				I2158_v2	UZZ5054	0.153	Group3
STO001.A0101	UZZ5054	0.17856	Group3				I2158_v2	STO3	0.16914	Group3
STO001.A0101	STO3	0.16928	Group3				I2158_v2	STO5	0.16711	Group3
STO001.A0101	STO5	0.16368	Group3				I2158_v2	Grotta_Mura	0.19113	Group3
UZZ096	I2158_v2	0.16241	Group3				UZZ5054	STO3	0.16518	Group3
UZZ096	UZZ5054	0.15585	Group3				UZZ5054	STO5	0.16365	Group3
UZZ096	STO3	0.16832	Group3				UZZ5054	Grotta_Mura	0.18619	Group3
UZZ096	STO5	0.15694	Group3				STO3	STO5	0.14316	Group3
I2158_v2	UZZ5054	0.153	Group3				STO3	Grotta_Mura	0.18571	Group3
I2158_v2	STO3	0.16914	Group3				STO5	Grotta_Mura	0.18512	Group3
I2158_v2	STO5	0.16711	Group3				R11.SG	R15.SG	0.19636	Group2
UZZ5054	STO3	0.16518	Group3				R11.SG	R7.SG	0.19011	Group2
UZZ5054	STO5	0.16365	Group3				R11.SG	AC16	0.19526	Group2
STO3	STO5	0.14316	Group3				R15.SG	R7.SG	0.19296	Group2
Villabruna	PRD001.A0101	0.21837	Group1				R15.SG	AC16	0.1953	Group2
Villabruna	RIP001.A0101	0.20826	Group1				R7.SG	AC16	0.19581	Group2
PRD001.A0101	RIP001.A0101	0.211	Group1				Villabruna	PRD001.A0101	0.21837	Group1
							Villabruna	RIP001.A0101	0.20826	Group1
							PRD001.A0101	RIP001.A0101	0.211	Group1

## Sheet: Figure S10a
Supplementary Figure S10a: D statistics to estimate admixture with archaic humans
a) Neanderthal Vindija 33.19
COLUMN	DESCRIPTION
W	tested individual
X	African reference genome (24 YRI -Yoruba in Ibadan, Nigeria- West Africans)
Y	archaic reference genome
Z	outgroup
D	D statistic value
stderr	standard error of the D statistics calculated using the block jackknife
Zscore	Z-score value
BABA	counts of observed site patterns
ABBA	counts of observed site patterns
nsnps	number of SNPs used for a given calculation
W	X	Y	Z	D	stderr	Zscore	BABA	ABBA	nsnps
Le Mura1	Yoruba	Vindija_Neanderthal.DG	Chimp.REF	0.0308	0.004789	6.434	30446	28627	912946
Tagliente2	Yoruba	Vindija_Neanderthal.DG	Chimp.REF	0.0342	0.007885	4.34	5641	5268	169675
Mbuti	Yoruba	Vindija_Neanderthal.DG	Chimp.REF	0.0033	0.001892	1.75	31729	31520	1020444
Villabruna	Yoruba	Vindija_Neanderthal.DG	Chimp.REF	0.0285	0.005044	5.654	26796	25310	796217
Oase1	Yoruba	Vindija_Neanderthal.DG	Chimp.REF	0.0896	0.010406	8.609	6236	5211	177370

[truncated: 4 more sheets: Figure S10b, Figure S11a, Figure S11b, Figure S12]
